# Supplementary material for: Early structural and functional plasticity alterations in a susceptibility period of DYT1 dystonia mouse striatum
Source: eLife. 2018 Mar 5;7:e33331. doi: 10.7554/eLife.33331 (PMC5849413; doi:10.7554/eLife.33331)
Supplement: Figure 1—source data 1. [file elife-33331-fig1-data1.xlsx]

## Sheet: Figure 1
Figure 1A		action potential amplitude
		Tor1a+/+	N=11			Tor1a+/Δgag	N=8			Student's t test
		mean	SEM	n		mean	SEM	n
		69.62	1.14	11		66.65	1.68	11		p>0,05
Figure 1B		paired pulse ratio
		Tor1a+/+	N=3			Tor1a+/Δgag	N=3		2way-ANOVA
	ISI	mean	SEM	n	ISI	mean	sem	n
	25	1.23578	0.19883	5	25	1.21603	0.05383	5	p<0,05
	50	1.19973	0.12154	5	50	1.18917	0.08302	5	p<0,06
	100	1.02171	0.08858	5	100	1.018	0.04874	5
	200	0.98526	0.04787	5	200	1.01674	0.03389	5
	500	0.9615	0.03847	5	500	0.94356	0.02487	5
	1000	0.98449	0.04749	5	1000	0.94718	0.02986	5
Figure 1C		sEPSC							Figure 1D		mEPSC
			sEPSCs								mEPSCs
			P26 Tor1a+/+ (N=9)	n	P26 Tor1a+/Δgag	n	p				P26 Tor1a+/+	n	P26 Tor1a+/Δgag	n	p
					(N=8)						(N=9)		(N=8)
		Frequency (Hz)	2.51 ± 0.41	11	2.99 ± 0.47	9	>0.05			Frequency (Hz)	1.73 ± 0.29	11	2.37 ± 0.40	9	>0.05
		Amplitude (pA)	9.00 ± 0.99	11	10.46 ± 0.99	9	>0.05			Amplitude (pA)	7.45 ± 1.09	9	10.11 ± 0.97	9	<0.05
Figure 1E		sIPSC							Figure 1F		mIPSC
			sIPSCs								mIPSCs
			P26 Tor1a+/+ (N=9)	n	P26 Tor1a+/Δgag (N=9)	n	p				P26 Tor1a+/+ (N=9)	n	P26 Tor1a+/Δgag	n	p
													(N=9)
		Frequency (Hz)	2.01 ± 0.18	11	2.09 ± 0.24	10	>0,05			Frequency (Hz)	1.60 ± 0.16	9	1.53 ± 0.20	9	>0.05
		Amplitude (pA)	14.58 ±1.61	10	13.96 ± 1.80	10	>0.05			Amplitude (pA)	14.28 ±2.39	8	12.87 ± 1.75	9	>0.05
