# Supplementary material for: Early structural and functional plasticity alterations in a susceptibility period of DYT1 dystonia mouse striatum
Source: eLife. 2018 Mar 5;7:e33331. doi: 10.7554/eLife.33331 (PMC5849413; doi:10.7554/eLife.33331)
Supplement: Figure 2—source data 1. [file elife-33331-fig2-data1.xlsx]

## Sheet: Figure 2
	Figure 2A		time-course LTD Tor1a+/+							Figure 2B		time-course LTD Tor1a+/∆gag							Figure 2C		time-course LTP Tor1a+/+							Figure 2D		time-course LTP Tor1a+/∆gag							Figure 2E	LTD			Figure 2F	LTP
			P15-27	N=9, n=10			P28-35	N=8, n=8				P15-27	N=8, n=12			P28-35	N=8, n=12		Tor1a+/+		P15-23	N=6, n=10			P24-35	N=6, n=10		Tor1a+/∆gag		P15-23	N=6, n=10			P24-35	N=9, n=10		Tor1a+/+				Tor1a+/+
																																					P15-27	pre-HFS	post-HFS		P15-23	pre-HFS	post-HFS
			EPSP amplitude				EPSP amplitude					EPSP amplitude				EPSP amplitude					EPSP amplitude				EPSP amplitude					EPSP amplitude				EPSP amplitude			mean	99.06	99.4568		mean	99.6665	104.678
		time (s)	mean	sem		time (s)	mean	sem			time (s)	mean	sem		time (s)	mean	sem			time (s)	mean	sem		time (s)	mean	sem			time (s)	mean	sem		time (s)	mean	sem		SEM	4.01025	4.65012		SEM	0.601808	8.99303
		-520	98.7346	4.49677		-520	104.107	3.22161			-520	100.54	4.22228		-520	105.252	2.07566			-520	102.319	4.12305		-520	104.439	6.38314			-520	106.496	8.28627		-520	98.8705	3.89381		n=10	paired Student's t test p>0,05			n=10	paired Student's t test p>0,05
		-500	105.36	3.7386		-500	101.846	3.74875			-500	97.242	1.89102		-500	97.8684	2.00653			-500	98.7088	5.88186		-500	103.51	6.53875			-500	104.312	6.2297		-500	93.7733	3.00164
		-480	103.685	5.72352		-480	102.909	9.53999			-480	97.3011	3.37091		-480	106.66	3.82295			-480	103.512	2.16448		-480	98.5615	7.41782			-480	105.724	7.95323		-480	97.2112	2.88197		Tor1a+/+				Tor1a+/+
		-460	96.6478	8.1161		-460	90.4554	2.70376			-460	100.662	3.46815		-460	100.861	1.65887			-460	102.996	3.44739		-460	94.9271	3.00049			-460	103.829	5.44341		-460	102.105	5.93776		P28-35	pre-HFS	post-HFS		P24-35	pre-HFS	post-HFS
		-440	102.703	6.58752		-440	97.5213	3.67314			-440	102.418	3.93852		-440	105.088	3.60977			-440	96.8641	4.0747		-440	90.6462	3.78791			-440	103.592	5.72627		-440	91.16	3.82838		mean	100	59.6326		mean	101.345	148.798
		-420	95.6938	2.50081		-420	100.769	6.31921			-420	102.667	3.96565		-420	102.238	2.50235			-420	99.708	3.61081		-420	100.741	4.65606			-420	106.069	7.19212		-420	92.3072	3.20486		SEM	2.9604	2.63067		SEM	0.547569	15.3905
		-400	100.349	7.73747		-400	100.598	5.68023			-400	104.387	3.27576		-400	94.8031	4.29853			-400	104.637	4.32127		-400	100.633	4.25714			-400	100.917	5.6213		-400	95.3566	2.6703		n=8	paired Student's t test p<0,05			n=10	paired Student's t test p<0,05
		-380	102.689	3.37459		-380	100.502	5.78208			-380	103.571	5.98495		-380	103.669	3.49145			-380	101.959	5.10353		-380	94.6962	4.85871			-380	97.5129	5.08049		-380	97.0953	3.31617
		-360	97.2617	3.5872		-360	108.139	3.91663			-360	102.608	3.18447		-360	102.161	1.43362			-360	101.409	3.24784		-360	98.6956	4.07975			-360	107.256	5.81615		-360	94.3768	4.5525		Tor1a+/∆gag				Tor1a+/∆gag
		-340	105.088	2.86868		-340	95.6992	8.28921			-340	103.115	4.29269		-340	102.019	4.95113			-340	103.889	4.14363		-340	103.698	2.19927			-340	95.164	5.73933		-340	101.463	4.29488		P15-27	pre-HFS	post-HFS		P15-23	pre-HFS	post-HFS
		-320	97.8566	4.53815		-320	100.421	2.03007			-320	103.593	4.03122		-320	100.61	1.3512			-320	101.079	4.33961		-320	94.8451	5.86563			-320	100.363	3.56605		-320	100.125	2.48607		mean	98.0946	96.8527		mean	102	174.681
		-300	95.9026	3.3458		-300	98.2264	11.5512			-300	98.1783	2.85379		-300	103.791	2.03377			-300	95.1829	4.15896		-300	92.4214	3.80408			-300	93.1722	2.14477		-300	95.8393	2.95722		SEM	1.8429	11.3523		SEM	1.28127	22.5869
		-280	96.0082	2.59912		-280	96.4367	3.85548			-280	100.497	5.64238		-280	103.256	2.90963			-280	103.659	4.6041		-280	91.5384	4.50218			-280	94.4593	3.75752		-280	101.682	4.02555		n=12	paired Student's t test p>0,05			n=10	paired Student's t test p<0,05
		-260	99.9768	1.99031		-260	106.001	6.6011			-260	105.419	4.03315		-260	102.843	5.26912			-260	103.192	4.30678		-260	99.6702	3.77727			-260	100.604	3.25769		-260	99.8938	4.77084
		-240	97.8299	4.14351		-240	91.774	1.7811			-240	103.671	2.70757		-240	99.482	3.04408			-240	102.29	4.93336		-240	98.6111	2.54919			-240	97.3916	3.3894		-240	99.2852	4.07912		Tor1a+/∆gag				Tor1a+/∆gag
		-220	101.388	3.18352		-220	102.611	2.72719			-220	102.312	3.44746		-220	97.5404	1.9368			-220	97.5501	3.73554		-220	92.9659	3.97294			-220	98.3334	4.41753		-220	100.573	2.5679		P28-35	pre-HFS	post-HFS		P24-35	pre-HFS	post-HFS
		-200	101.423	1.73454		-200	105.517	2.62059			-200	98.1418	5.40673		-200	100.111	3.50181			-200	102.596	4.59274		-200	101.726	2.4635			-200	94.6859	4.61695		-200	107.095	4.85297		mean	98.5946	100.293		mean	101.32	172.353
		-180	104.312	6.93805		-180	100.177	7.68266			-180	96.9377	2.37237		-180	94.7597	3.40176			-180	97.1735	5.09882		-180	107.433	3.62408			-180	92.0103	4.7833		-180	103.692	2.69481		SEM	1.0428	4.16466		SEM	0.66285	11.0574
		-160	100.208	4.0644		-160	102.797	3.9888			-160	104.634	3.80258		-160	98.2616	3.76644			-160	91.3494	3.0756		-160	103.624	4.65257			-160	96.7259	4.76194		-160	99.1191	2.79828		n=12	paired Student's t test p>0,05			n=10	paired Student's t test p<0,05
		-140	99.344	4.83366		-140	104.214	3.35868			-140	95.562	1.70776		-140	97.6978	2.06081			-140	97.1355	1.83415		-140	106.109	4.79896			-140	100.076	2.98214		-140	100.477	3.22068
		-120	95.943	2.07629		-120	99.5613	2.28113			-120	97.6466	4.24029		-120	97.6997	3.19537			-120	97.713	4.01615		-120	93.9566	7.09738			-120	102.607	2.55203		-120	102.559	5.24054
		-100	91.4212	2.1565		-100	101.526	0.53231			-100	95.1828	3.85324		-100	96.6829	1.93128			-100	104.863	5.91679		-100	109.423	5.35036			-100	99.973	4.98588		-100	104.557	4.43664
		-80	97.6924	2.06825		-80	95.5794	7.42248			-80	98.7138	5.57321		-80	96.5826	2.40553			-80	97.2506	3.72232		-80	108.25	13.5101			-80	96.8161	5.76089		-80	105.7	3.53234
		-60	104.835	3.93656		-60	101.214	2.63755			-60	106.814	3.50637		-60	100.17	1.20393			-60	97.8172	6.7776		-60	104.801	3.37067			-60	103.306	3.85173		-60	108.023	2.99334
		-40	102.154	5.31334		-40	98.2655	3.5439			-40	91.1786	4.2818		-40	105.282	2.96048			-40	99.0017	2.67253		-40	96.7268	5.55536			-40	103.559	4.9846		-40	101.579	2.87123
		-20	100.946	11.0231		-20	96.9628	2.17865			-20	95.0252	3.92099		-20	96.3799	3.09985			-20	103.811	4.76653		-20	101.226	2.99254			-20	99.619	3.67557		-20	107.338	3.10644
		hfs	***************			hfs	***************				hfs	***************			hfs	***************				hfs	***************			hfs	***************				hfs	***************			hfs	***************
		20	98.6874	13.1017		20	66.6903	4.76018			20	92.3654	11.2101		20	88.3179	7.18158			20	109.766	18.37		20	135.627	6.82022			20	155.059	5.2516		20	166.231	15.0621
		40	97.6652	13.0087		40	64.4776	5.85127			40	91.2088	13.0958		40	95.4429	5.73211			40	108.765	9.79006		40	138.656	17.7982			40	157.774	13.6775		40	167.096	18.2305
		60	98.1398	8.24456		60	62.6122	2.83696			60	94.3414	13.7285		60	98.2956	4.25969			60	114.609	13.1569		60	140.066	12.3592			60	163.837	15.1952		60	168.642	16.2195
		80	99.0702	6.41576		80	62.0933	5.69252			80	98.7402	9.37569		80	101.977	3.21057			80	105.209	8.84153		80	152.682	9.58613			80	167.656	14.0089		80	161.859	16.1525
		100	95.2605	5.3572		100	60.4106	7.66536			100	98.7084	6.2829		100	98.6301	5.70725			100	107.254	15.2783		100	144.085	6.25227			100	171.002	12.7787		100	162.192	16.2021
		120	97.5723	2.58639		120	63.2508	3.9115			120	95.8795	9.48101		120	97.483	5.93704			120	99.8859	15.2972		120	144.212	4.23862			120	147.972	16.7972		120	164.502	17.5921
		140	101.641	3.85575		140	57.2493	5.99671			140	98.8845	9.85963		140	99.8871	7.05288			140	103.659	14.1883		140	151.835	8.56401			140	152.003	20.0585		140	161.776	14.4496
		160	105.557	3.4187		160	53.6111	10.9594			160	98.1967	10.3919		160	96.9064	6.68326			160	110.399	10.8744		160	149.69	5.09648			160	165.294	20.1903		160	153.1	18.8827
		180	98.2016	3.94502		180	53.4184	6.82344			180	102.971	9.12556		180	101.09	5.82489			180	106.331	7.89177		180	138.561	8.97479			180	156.376	14.9919		180	166.168	17.4529
		200	98.9673	7.4598		200	61.2369	0.14131			200	102.555	8.75201		200	97.308	7.91407			200	100.11	13.5315		200	139.893	4.66711			200	149.801	16.4666		200	166.822	18.8
		220	103.074	5.85145		220	56.1594	3.24728			220	93.8207	8.50621		220	94.8962	9.17309			220	103.422	15.0872		220	141.597	2.61311			220	168.964	15.394		220	163.968	17.1378
		240	99.4533	5.68834		240	59.9017	3.23509			240	96.95	8.44652		240	96.0362	8.13313			240	107.255	7.96684		240	153.614	10.0412			240	173.382	14.5592		240	162.918	12.8436
		260	99.6354	4.12694		260	58.6227	6.94749			260	100.345	8.90158		260	96.6879	6.74075			260	106.31	9.97017		260	138.852	9.96846			260	168.899	6.79674		260	167.232	12.1462
		280	102.422	9.11118		280	56.2447	0.75209			280	96.3447	10.0088		280	99.4322	9.64254			280	107.258	12.7285		280	143.916	5.38972			280	175.494	13.7022		280	169.322	17.9322
		300	99.1813	10.0468		300	64.011	5.84418			300	90.786	12.4829		300	90.1175	6.02363			300	116.101	7.03257		300	145.398	7.96244			300	168.959	14.4819		300	161.239	17.0282
		320	99.6501	8.0153		320	60.1529	1.57132			320	95.9156	10.3598		320	95.1791	6.57993			320	114.323	11.9124		320	151.532	3.32576			320	160.538	16.1059		320	169.654	15.1279
		340	96.3144	7.2204		340	65.3162	1.86464			340	92.5347	7.37252		340	99.219	5.74838			340	105.953	9.26398		340	143.575	6.60762			340	167.403	17.4744		340	165.59	17.4174
		360	102.516	8.77424		360	61.8659	5.25853			360	93.5292	10.0878		360	97.2429	4.34902			360	105.424	6.50365		360	155.939	10.9714			360	173.994	6.93966		360	169.474	19.4763
		380	105.404	6.28395		380	62.9827	0.40085			380	94.8855	7.0004		380	98.9659	8.66917			380	107.801	15.0418		380	152.046	13.624			380	172.281	20.0088		380	169.792	18.7032
		400	101.713	7.2897		400	60.4432	0.61674			400	91.1554	7.34212		400	95.687	4.78424			400	95.9005	9.63006		400	148.143	7.36272			400	174.018	21.0129		400	168.177	17.584
		420	104.736	5.5738		420	61.5929	4.2829			420	97.0212	5.02394		420	100.912	4.6708			420	107.841	10.6387		420	148.835	18.2639			420	179.285	19.2323		420	166.995	10.8868
		440	104.701	4.21346		440	68.3937	3.10059			440	93.4714	6.16506		440	100.406	6.04429			440	106.796	6.34954		440	154.497	13.1351			440	175.752	13.235		440	164.786	17.1203
		460	99.8431	4.80096		460	59.1941	9.60333			460	91.2758	6.25844		460	96.6527	4.99364			460	108.411	14.1901		460	142.04	4.6505			460	185.898	10.1491		460	181.455	18.0191
		480	104.89	7.80591		480	67.5828	4.56709			480	96.1274	7.16578		480	92.0875	4.53778			480	98.8719	16.6064		480	154.993	9.64987			480	176.069	5.73051		480	170.959	10.8262
		500	106.228	8.3033		500	55.44	1.08153			500	92.9048	8.27848		500	101.753	6.75851			500	94.0113	12.5466		500	145.987	7.59213			500	172.319	21.0102		500	172.553	19.9205
		520	111.337	5.97137		520	60.3458	0.913			520	98.6079	4.17238		520	96.8116	5.55463			520	108.497	4.62042		520	149.101	3.156			520	179.236	6.56812		520	171.106	20.8583
		540	104.651	8.02764		540	63.0638	0.20871			540	105.062	10.6914		540	95.6743	4.72015			540	97.3923	11.6905		540	137.854	10.0495			540	166.901	17.227		540	178.563	12.5645
		560	105.543	6.22857		560	65.2132	2.36151			560	107.272	11.3654		560	103.526	4.07027			560	105.934	13.1826		560	147.771	14.9591			560	177.935	5.53515		560	171.469	20.3034
		580	101.81	6.75862		580	61.4117	3.22183			580	100.211	6.49975		580	96.4978	5.93922			580	109.512	10.4222		580	146.289	11.4587			580	174.672	21.6428		580	171.079	21.9488
		600	99.3984	6.17124		600	65.2977	3.38733			600	103.651	3.64658		600	100.907	4.89279			600	109.048	7.88526		600	149.387	12.9401			600	178.675	2.78244		600	171.89	19.9437
		620	97.398	6.18663		620	64.6709	2.97566			620	96.5014	6.88205		620	98.6618	4.50706			620	116.667	8.19468		620	152.84	8.85693			620	177.238	19.2176		620	172.392	20.1738
		640	94.7004	6.31726		640	59.9398	4.38836			640	99.0796	6.75146		640	96.2763	5.17645			640	96.4286	10.5675		640	146.003	11.415			640	169.774	22.1807		640	177.131	11.1646
		660	103.453	3.98217		660	59.0278	4.00377			660	106.109	10.0693		660	94.082	8.69752			660	99.8002	12.1923		660	152.551	14.4177			660	173.686	18.0542		660	170.465	20.1669
		680	102.331	6.41259		680	63.4625	3.20337			680	98.6665	5.02147		680	100.922	8.83096			680	101.322	12.5662		680	154.493	13.275			680	177.1	20.3165		680	171.373	20.4269
		700	92.9783	5.50539		700	62.3793	1.49441			700	93.164	5.89976		700	92.9352	6.54831			700	109.508	6.51598		700	150.055	14.1237			700	186.67	12.5234		700	171.84	23.059
		720	92.364	9.20748		720	70.1841	0.76775			720	92.1211	3.52124		720	98.6681	5.61588			720	109.527	8.4886		720	155.394	12.4916			720	184.751	17.091		720	178.588	18.7289
		740	100.526	5.89008		740	67.9789	2.14595			740	92.6481	4.57232		740	96.8372	6.36614			740	107.725	10.0866		740	153.58	15.6475			740	164.703	20.1377		740	176.101	20.6152
		760	103.097	1.94232		760	67.221	0.03262			760	92.0357	6.56002		760	93.1483	7.51642			760	103.788	17.0983		760	145.049	9.62018			760	180.276	16.3412		760	174.173	20.9163
		780	99.6196	4.93246		780	61.6091	1.51773			780	96.589	5.97233		780	95.8391	4.93107			780	100.378	6.47293		780	139.124	13.28			780	163.468	19.5456		780	175.996	20.5562
		800	99.7298	6.50347		800	70.3079	0.32749			800	96.2744	5.22121		800	97.5325	5.63231			800	99.7556	6.41795		800	141.548	11.9386			800	165.615	15.6858		800	164.465	20.4352
		820	97.3227	6.09718		820	65.457	2.79625			820	98.7196	6.98819		820	94.0398	7.94523			820	97.2643	6.22463		820	151.857	18.4665			820	172.76	18.7881		820	172.645	20.1991
		840	100.95	5.19036		840	59.7878	2.00063			840	101.102	6.31054		840	98.9737	3.39417			840	95.4528	2.11977		840	152.439	13.959			840	180.224	22.5892		840	173.065	15.8771
		860	98.896	6.66841		860	63.159	0.83747			860	100.702	4.24068		860	101.199	5.65879			860	98.3095	5.49596		860	143.38	11.7279			860	176.754	17.833		860	176.068	19.7746
		880	93.1651	4.93044		880	64.2938	2.35027			880	93.5917	7.29426		880	101.323	3.88373			880	96.3643	5.47556		880	146.885	13.7325			880	158.79	20.527		880	168.092	16.8187
		900	100.364	5.82969		900	59.5252	5.3779			900	99.8363	7.21941		900	104.012	4.15671			900	104.657	8.74084		900	157.808	18.7626			900	167.705	18.8657		900	171.629	17.6571
		920	99.5602	9.14213		920	60.8917	0.3936			920	99.9054	1.86234		920	99.3343	4.75408			920	103.359	7.78416		920	153.637	15.1177			920	168.195	13.1705		920	173.638	17.4365
		940	104.115	7.24291		940	67.021	2.12012			940	95.7791	4.44006		940	99.484	6.73257			940	100.112	6.02985		940	149.513	9.00466			940	177.923	12.1784		940	165.695	18.1211
		960	103.535	7.29814		960	62.2364	6.05679			960	93.2439	4.50856		960	101.61	6.40845			960	96.486	5.02649		960	155.257	13.0775			960	191.477	21.2212		960	169.986	20.1933
		980	105.817	6.81257		980	61.8509	7.41978			980	95.9791	8.426		980	101.828	4.05328			980	97.4073	6.19177		980	155.391	16.0576			980	185.787	19.6534		980	169.321	25.6335
		1000	94.9969	5.74127		1000	64.303	9.61244			1000	98.5749	4.09455		1000	100.636	4.77832			1000	100.428	7.91222		1000	147.622	17.6311			1000	187.343	18.0691		1000	171.103	18.9827
		1020	101.029	5.49465		1020	57.9661	3.9209			1020	97.8871	4.97426		1020	103.686	4.54559			1020	92.8613	7.11645		1020	141.758	14.0638			1020	172.129	22.8479		1020	162.609	19.3617
		1040	98.5249	4.21173		1040	59.501	3.61974			1040	98.3052	6.94733		1040	96.9352	5.74949			1040	103.92	10.6276		1040	150.38	13.9071			1040	178	13.7975		1040	164.134	18.1604
		1060	97.2437	6.07462		1060	59.5288	6.58284			1060	94.7383	6.41365		1060	98.7836	5.97892			1060	106.511	4.36175		1060	148.359	11.946			1060	182.719	18.3699		1060	180.747	19.2031
		1080	95.4006	6.06741		1080	61.1648	7.42121			1080	99.7919	5.21916		1080	97.001	5.20106			1080	105.548	6.88014		1080	141.231	12.3899			1080	178.621	20.5227		1080	182.571	14.4787
		1100	96.3238	5.40779		1100	66.6188	3.671			1100	101.758	3.2219		1100	95.6291	6.39574			1100	95.4613	9.2959		1100	149.456	12.5024			1100	194.441	18.6707		1100	163.949	19.5217
		1120	101.741	3.23028		1120	59.7631	4.1875			1120	93.5767	11.5617		1120	102.498	7.25379			1120	92.7866	7.48582		1120	156.703	12.4735			1120	179.078	20.8268		1120	174.341	20.5813
		1140	97.1392	4.58076		1140	60.9625	1.98588			1140	98.032	9.64772		1140	101.978	5.86261			1140	106.311	6.93718		1140	152.779	13.098			1140	173.523	13.9779		1140	173.902	18.0774
		1160	99.5723	6.28586		1160	62.4766	7.34911			1160	99.2896	10.6158		1160	98.3407	8.27265			1160	105.403	12.74		1160	150.596	15.7368			1160	173.971	16.386		1160	184.068	16.4067
		1180	100.511	6.68499		1180	58.486	0.18918			1180	94.2981	8.57585		1180	101.242	7.92457			1180	91.6984	10.913		1180	145.98	13.0569			1180	197.727	16.1425		1180	176.196	14.0492
		1200	98.3047	6.92587		1200	53.2105	1.65847			1200	90.396	9.22633		1200	107.489	4.90399			1200	112.306	10.9894		1200	151.603	10.7944			1200	192.778	11.2228		1200	173.555	17.7824
		1220	97.534	3.21518		1220	54.8415	6.19972			1220	99.093	8.78189		1220	93.9638	8.66736			1220	104.788	9.68307		1220	154.098	17.8441			1220	181.006	17.9167		1220	180.74	11.5134
		1240	100.996	7.2162		1240	56.063	1.35868			1240	99.2764	9.70372		1240	100.402	4.89986			1240	105.897	9.13412		1240	155.395	12.2509			1240	177.249	16.7152		1240	174.874	20.6097
		1260	99.4018	5.6729		1260	57.2735	6.24259			1260	95.9588	7.86911		1260	101.753	2.91886			1260	99.1085	11.0973		1260	153.571	16.3263			1260	188.143	15.7231		1260	177.772	19.6933
		1280	101.113	5.02143		1280	50.9612	8.28259			1280	101.161	5.2596		1280	98.1364	8.34261			1280	105.213	9.09355		1280	143.544	13.1435			1280	179.927	19.2257		1280	168.36	14.8288
		1300	101.486	6.18028		1300	55.7707	9.19966			1300	94.3565	11.279		1300	100.772	7.1802			1300	111.369	13.5042		1300	145.868	13.7713			1300	176.199	15.8155		1300	187.774	12.4084
		1320	103.243	2.44858		1320	59.3227	1.79224			1320	95.4759	10.297		1320	96.3306	6.81234			1320	101.268	7.17572		1320	143.582	15.0117			1320	177.186	16.847		1320	185.944	24.1069
		1340	100.897	7.20029		1340	53.8969	0.96189			1340	95.8139	10.9589		1340	96.5424	8.34096			1340	103.248	6.14041		1340	153.558	20.1589			1340	185.693	16.9854		1340	168.228	21.0359
		1360	102.395	4.81332		1360	63.6443	0.54553			1360	97.1547	13.8512		1360	105.401	4.39092			1360	110.017	6.60433		1360	148.512	14.6123			1360	188.964	24.588		1360	177.36	13.4944
		1380	97.4588	6.8194		1380	54.7761	3.0619			1380	103.918	13.312		1380	97.1382	6.10536			1380	99.0347	7.73147		1380	145.133	10.8642			1380	179.996	19.2722		1380	180.405	18.6693
		1400	94.7913	8.03109		1400	60.4887	3.53492			1400	100.637	12.1645		1400	104.731	7.41148			1400	105.171	13.0493		1400	150.908	11.0795			1400	190.248	17.2701		1400	172.406	24.8203
		1420	95.2604	6.56387		1420	60.0964	1.88976			1420	98.0595	14.2479		1420	100.129	7.26299			1420	100.765	6.83778		1420	154.35	10.4585			1420	174.85	16.3361		1420	171.636	14.1298
		1440	98.0327	4.69618		1440	57.9549	3.79166			1440	100.831	15.0649		1440	101.384	3.79735			1440	101.976	6.14147		1440	153.191	7.83748			1440	182.259	16.5825		1440	170.261	12.8085
		1460	93.0133	5.28559		1460	64.2218	2.97024			1460	96.0153	7.97048		1460	96.058	8.45556			1460	94.3002	7.5608		1460	153.843	14.4479			1460	195.409	16.5498		1460	177.155	19.7786
		1480	97.5523	6.36826		1480	62.89	6.29302			1480	96.6723	7.34135		1480	96.5707	4.936			1480	104.765	6.40729		1480	157.232	13.2743			1480	185.68	15.9391		1480	171.788	21.1559
		1500	--	--		1500	59.4131	3.20492			1500	98.5567	9.48173		1500					1500	97.6023	7.24917		1500	145.687	10.6732			1500	178.757	15.5033		1500	180.245	19.3984
			--	--
