# Supplementary material for: Early structural and functional plasticity alterations in a susceptibility period of DYT1 dystonia mouse striatum
Source: eLife. 2018 Mar 5;7:e33331. doi: 10.7554/eLife.33331 (PMC5849413; doi:10.7554/eLife.33331)
Supplement: Figure 3—source data 1. [file elife-33331-fig3-data1.xlsx]

## Sheet: Figure 3
	Figure 3A		NMDAR/AMPAR ratio							Figure 3B		NMDAR/AMPAR ratio
		P26	Tor1a+/+	Tor1a+/Δgag							P60	Tor1a+/+	Tor1a+/Δgag
		mean	2.92017	1.80939							mean	1.75033	2.01125
		SEM	0.37696	0.25159							SEM	0.15	0.1214
			N=3, n=8	N=3, n=6								N=3, n=7	N=3, n=7
			Student's t test p<0,05									Student's t test p>0,05
	Figure 3C		AMPAR IV relationship							Figure 3D		AMPAR IV relationship in NASPM
		P26	Tor1a+/+			Tor1a+/Δgag					P26	Tor1a+/+			Tor1a+/Δgag
		HP (mV)	Mean	SEM	n	Mean	SEM	n			HP (mV)	Mean	SEM	n	Mean	SEM	n
		-70	-153.458	24.91	9	-364.75	107.86	8			-70	-113.79	29.28	5	-239.645	49.43	7
		-40	-107.979	17.86	7	-261.13	80.04	7			-40	-81.9262	27.05	5	-174.362	35.19	7
		-25	-75.3014	13.11	7	-170.624	54.98	7			-25	-56.0532	19.24	5	-120.206	26.68	7
		-10	-33.987	13.53	7	-99.8366	28.57	8			-10	-33.0154	13.97	5	-68.6429	21.64	7
		0	1.73847	6.77	8	-15.2278	11.01	8			0	2.91627	9.582	5	9.28238	5.404	7
		10	25.5421	8.574	8	33.1309	9.03	8			10	17.2169	3.589	5	28.1094	5.597	7
		25	54.7608	15.36	8	95.8194	25.33	8			25	37.1913	8.472	5	73.8573	18.08	7
		40	88.131	24.75	7	153.638	40.22	8			40	58.165	13.91	5	115.302	30.61	7
			2way ANOVA p<0,01 at HP=-70 mV									2way ANOVA p<0,01 at HP=-70 mV
		P26	AMPAR rectification index								P26	AMPAR rectification index in NASPM
			Tor1a+/+	Tor1a+/Δgag								Tor1a+/+	Tor1a+/Δgag
		mean	0.497728	0.426691							mean	0.52554	0.460788
		SEM	0.07441	0.03989							SEM	0.03478	0.03182
			n=7	n=8								n=5	n=7
			Student's t test p>0,05									Student's t test p>0,05
	Figure 3E		Normalized NMDAR IV relationship							Figure 3G		NMDAR rise and decay time
		P26	Tor1a+/+			Tor1a+/Δgag					P26	Tor1a+/+ (N=8)			Tor1a+/Δgag (N=6)
		HP (mV)	Mean	SEM	n	Mean	SEM	n			ms	Mean	SEM	n	Mean	SEM	n	Student's t test
		-70	-0.122481	0.01879	9	-0.1702	0.0696	8			Rise time	7.779	0.4199	9	9231	1371	7	p>0,05
		-40	-0.18396	0.01846	9	-0.241003	0.04763	8			Decay time	502.5	20.06	9	422.1	30.15	7	p<0,05
		-25	-0.31	0.017	8	-0.44	0.067	8
		-10	-0.3	0.027	6	-0.43	0.07	7
		0	-0.194939	0.04611	8	-0.23	0.091	5
		10	-0.00455249	0.06074	9	0.0938088	0.05593	8
		25	0.480125	0.04504	8	0.509614	0.0251	8
		40	1	0	9	1	0	8
			2way ANOVA p>0,05
