# Supplementary material for: Early structural and functional plasticity alterations in a susceptibility period of DYT1 dystonia mouse striatum
Source: eLife. 2018 Mar 5;7:e33331. doi: 10.7554/eLife.33331 (PMC5849413; doi:10.7554/eLife.33331)
Supplement: Figure 5—source data 1. [file elife-33331-fig5-data1.xls]

## Sheet: wt
					SPINES								DENDRITES												1.01003	0.516545	#DIV/0!			377	1.16042	0.629071			469	0.722411	0.445654			230	1.33357	0.487351			0	#VALUE!		#VALUE!	#VALUE!
Count	Angle	Length	Spine No. (Tot)	Neuron No.	Spine No.	Length	Width	Neck	RATIO L/W	RATIO W/N	TYPE	TYPE!	Neuron No.	Length		Length	Width	Neck	RATIO L/W	RATIO W/N			TYPE!	Neuron No.	Length	Width	Spines/10 mm	Neuron No.	TYPE!	No	Length	Width	Neuron No.	TYPE!	No	Length	Width	Neuron No.	TYPE!	No	Length	Width	Neuron No.	TYPE!		TOT	SPINES	M	S
1	63.435	0.622	1	1	1	0.622						S	1	25.802									<>P	1	0.792287	0.455205	9.89641	1	M	66	0.839318	0.539076	1	S	90	0.684567	0.391078	1	T	15	1.23167	0.470933	1	P	0	171	171	38.5965	52.6316
2	-18.435	0.408	1	1	1		0.408					S	1	34.7	Average	0.9689	0.491314	0.32486	2.12147	1.58343			TYPE!	Neuron No.				Neuron No.	TYPE!				Neuron No.	TYPE!				Neuron No.	TYPE!				Neuron No.	TYPE!
3	0	0.28	1	1	1			0.28	1.52451	1.45714	S	S	1	24.821	Std. Dev.	0.380668	0.171194	0.107756	0.941389	0.53113			<>P	2	0.96139	0.460595	11.2143	2	M	81	1.02343	0.558309	2	S	118	0.708424	0.418653	2	T	65	1.34331	0.414969	2	P	0	264	264	30.6818	44.697
4	135	0.96	2	1	2	0.96						S	1	25.665	Std. Err.	0.0116049	0.00521893	0.003285	0.0286987	0.0161918			TYPE!	Neuron No.				Neuron No.	TYPE!				Neuron No.	TYPE!				Neuron No.	TYPE!				Neuron No.	TYPE!
5	-135	0.449	2	1	2		0.449					S	1	29.22									<>P	3	0.914476	0.45983	12.3022	3	M	58	1.00788	0.543121	3	S	68	0.711603	0.399206	3	T	21	1.31343	0.426095	3	P	0	147	147	39.4558	46.2585
6	-153.435	0.272	2	1	2			0.272	2.13808	1.65074	S	S	1	32.582									TYPE!	Neuron No.				Neuron No.	TYPE!				Neuron No.	TYPE!				Neuron No.	TYPE!				Neuron No.	TYPE!
7	-14.036	1.094	3	1	3	1.094						T	2	41.806									<>P	4	0.915215	0.396063	8.6697	4	M	38	1.05658	0.484921	4	S	34	0.667324	0.305647	4	T	7	1.35186	0.352857	4	P	0	79	79	48.1013	43.038
8	-45	0.383	3	1	3		0.383					T	2	77.435	No of Spines	1076							TYPE!	Neuron No.				Neuron No.	TYPE!				Neuron No.	TYPE!				Neuron No.	TYPE!				Neuron No.	TYPE!
9	-135	0.281	3	1	3			0.281	2.8564	1.36299	T	T	2	19.61	No of Neurons	10							<>P	5	1.0799	0.566728	9.21532	5	M	38	1.25382	0.714263	5	S	46	0.743609	0.487304	5	T	30	1.37527	0.501633	5	P	0	114	114	33.3333	40.3509
10	-36.87	0.616	4	1	4	0.616						S	2	13.272	Tot. Dendrites Length	1099.85							TYPE!	Neuron No.				Neuron No.	TYPE!				Neuron No.	TYPE!				Neuron No.	TYPE!				Neuron No.	TYPE!
11	-135	0.462	4	1	4		0.462					S	2	36.938	Spines per 10 mm	9.78313							<>P	6	1.16287	0.616719	11.364	6	M	10	1.3086	0.6862	6	S	10	0.7369	0.5349	6	T	12	1.39642	0.627	6	P	0	32	32	31.25	31.25
12	-153.435	0.299	4	1	4			0.299	1.33333	1.54515	S	S	2	46.353									TYPE!	Neuron No.				Neuron No.	TYPE!				Neuron No.	TYPE!				Neuron No.	TYPE!				Neuron No.	TYPE!
13	180	0.545	5	1	5	0.545						S	3	31.029		TYPE	TYPE	TYPE	TYPE	TOT	TOT		<>P	7	1.03977	0.537419	10.8454	7	M	10	1.2945	0.6434	7	S	20	0.71865	0.50365	7	T	13	1.33785	0.507846	7	P	0	43	43	23.2558	46.5116
14	-116.565	0.334	5	1	5		0.334					S	3	64.445		M	S	T	P		SPINES		TYPE!	Neuron No.				Neuron No.	TYPE!				Neuron No.	TYPE!				Neuron No.	TYPE!				Neuron No.	TYPE!
15	-116.565	0.24	5	1	5			0.24	1.63174	1.39167	S	S	3	13.05	No	377	469	230	0	1076	1076		<>P	8	1.01329	0.536027	7.92438	8	M	43	1.05614	0.641744	8	S	37	0.707838	0.466919	8	T	32	1.30888	0.473875	8	P	0	112	112	38.3929	33.0357
16	-36.87	0.628	6	1	6	0.628						S	3	10.967	% TOT	0.350372	0.435874	0.213755	0	1	1		TYPE!	Neuron No.				Neuron No.	TYPE!				Neuron No.	TYPE!				Neuron No.	TYPE!				Neuron No.	TYPE!
17	-149.036	0.836	6	1	6		0.836					S	4	35.23	% SPINES	0.350372	0.435874	0.213755		1			<>P	9	1.07874	0.612857	14.6677	9	M	9	1.42233	0.811222	9	S	17	0.781882	0.504529	9	T	9	1.29589	0.619111	9	P	0	35	35	25.7143	48.5714
18	26.565	0.616	6	1	6			0.616	0.751196	1.35714	S	S	4	27.427									TYPE!	Neuron No.				Neuron No.	TYPE!				Neuron No.	TYPE!				Neuron No.	TYPE!				Neuron No.	TYPE!
19	135	0.76	7	1	7	0.76						M	4	24.429	Parameter								<>P	10	1.14232	0.524013	6.35442	10	M	24	1.34158	0.668458	10	S	29	0.76331	0.444655	10	T	26	1.38112	0.479192	10	P	0	79	79	30.3797	36.7089
20	-123.69	0.589	7	1	7		0.589					M	4	4.036	RATIO W/N	1.7							TYPE!						TYPE!					TYPE!					TYPE!					TYPE!
21	-153.435	0.299	7	1	7			0.299	1.29032	1.9699	M	M	5	86.621	H P	5							<>P				#DIV/0!		M					S					T					P		#VALUE!	#VALUE!	#VALUE!	#VALUE!
22	-45	0.726	8	1	8	0.726						M	5	28.011	H M	3							TYPE!						TYPE!					TYPE!					TYPE!					TYPE!
23	33.69	0.496	8	1	8		0.496					M	5	9.075	H S	1							<>P				#DIV/0!		M					S					T					P		#VALUE!	#VALUE!	#VALUE!	#VALUE!
24	-116.565	0.253	8	1	8			0.253	1.46371	1.96047	M	M	6	28.159									TYPE!						TYPE!					TYPE!					TYPE!					TYPE!
25	41.634	1.701	9	1	9	1.701						M	7	39.648									<>P				#DIV/0!		M					S					T					P		#VALUE!	#VALUE!	#VALUE!	#VALUE!
26	-53.13	0.631	9	1	9		0.631					M	8	28.038									TYPE!						TYPE!					TYPE!					TYPE!					TYPE!
27	-26.565	0.337	9	1	9			0.337	2.69572	1.8724	M	M	8	12.875	#1394	neurons 1-4							<>P				#DIV/0!		M					S					T					P		#VALUE!	#VALUE!	#VALUE!	#VALUE!
28	-150.255	0.992	10	1	10	0.992						S	8	46.067	#1395	neurons 5-8							TYPE!						TYPE!					TYPE!					TYPE!					TYPE!
29	-71.565	0.399	10	1	10		0.399					S	8	26.241	#1397	neurons 9-10		Neuron	NECK				<>P				#DIV/0!		M					S					T					P		#VALUE!	#VALUE!	#VALUE!	#VALUE!
30	-45	0.261	10	1	10			0.261	2.48622	1.52874	S	S	8	4.253									TYPE!						TYPE!					TYPE!					TYPE!					TYPE!
31	-7.125	1.216	11	1	11	1.216						M	8	23.862				1	0.277795				<>P				#DIV/0!		M					S					T					P		#VALUE!	#VALUE!	#VALUE!	#VALUE!
32	-63.435	0.888	11	1	11		0.888					M	9	23.862									TYPE!						TYPE!					TYPE!					TYPE!					TYPE!
33	-116.565	0.238	11	1	11			0.238	1.36937	3.73109	M	M	10	28.296				2	0.316758				<>P				#DIV/0!		M					S					T					P		#VALUE!	#VALUE!	#VALUE!	#VALUE!
34	180	0.568	12	1	12	0.568						M	10	20.016									TYPE!						TYPE!					TYPE!					TYPE!					TYPE!
35	68.199	0.65	12	1	12		0.65					M	10	76.011				3	0.289463				<>P				#DIV/0!		M					S					T					P		#VALUE!	#VALUE!	#VALUE!	#VALUE!
36	-90	0.33	12	1	12			0.33	0.873846	1.9697	M	M	10										TYPE!						TYPE!					TYPE!					TYPE!					TYPE!
37	14.036	1.145	13	1	13	1.145						M	10					4	0.225886				<>P				#DIV/0!		M					S					T					P		#VALUE!	#VALUE!	#VALUE!	#VALUE!
38	-75.964	0.651	13	1	13		0.651					M	10										TYPE!						TYPE!					TYPE!					TYPE!					TYPE!
39	-71.565	0.325	13	1	13			0.325	1.75883	2.00308	M	M	10					5	0.392254				<>P				#DIV/0!		M					S					T					P		#VALUE!	#VALUE!	#VALUE!	#VALUE!
40	131.186	1.503	14	1	14	1.503						T	10										TYPE!						TYPE!					TYPE!					TYPE!					TYPE!
41	-146.31	0.429	14	1	14		0.429					T	10		0.9689			6	0.428438				<>P				#DIV/0!		M					S					T					P		#VALUE!	#VALUE!	#VALUE!	#VALUE!
42	63.435	0.377	14	1	14			0.377	3.5035	1.13793	T	T	10										TYPE!						TYPE!					TYPE!					TYPE!					TYPE!
43	45	0.646	15	1	15	0.646						S	10					7	0.419674				<>P				#DIV/0!		M					S					T					P		#VALUE!	#VALUE!	#VALUE!	#VALUE!
44	-45	0.332	15	1	15		0.332					S	10
45	-90	0.258	15	1	15			0.258	1.94578	1.28682	S	S	10					8	0.334464
46	51.34	0.934	16	1	16	0.934						S	10
47	135	0.402	16	1	16		0.402					S	10					9	0.4512
48	-90	0.284	16	1	16			0.284	2.32338	1.41549	S	S	10
49	-18.435	0.946	17	1	17	0.946						M	10					10	0.358241
50	-116.565	0.545	17	1	17		0.545					M	10
51	-116.565	0.313	17	1	17			0.313	1.73578	1.74121	M	M	10
52	-153.435	0.586	18	1	18	0.586						S	10
53	-90	0.493	18	1	18		0.493					S	10
54	-90	0.33	18	1	18			0.33	1.18864	1.49394	S	S	10
55	-161.565	0.449	19	1	19	0.449						S	10
56	-90	0.421	19	1	19		0.421					S	10
57	-90	0.304	19	1	19			0.304	1.06651	1.38487	S	S	10
58	-53.13	0.611	20	1	20	0.611						S	10
59	-135	0.281	20	1	20		0.281					S	10
60	-135	0.297	20	1	20			0.297	2.17438	0.946128	S	S	10
61	11.31	0.797	21	1	21	0.797						M	10
62	123.69	0.948	21	1	21		0.948					M	10
63	-90	0.327	21	1	21			0.327	0.840717	2.89908	M	M	10
64	153.435	1.236	22	1	22	1.236						T	10
65	-135	0.356	22	1	22		0.356					T	10
66	-90	0.289	22	1	22			0.289	3.47191	1.23183	T	T	10
67	-168.69	0.797	23	1	23	0.797						S	10
68	-71.565	0.421	23	1	23		0.421					S	10
69	-116.565	0.273	23	1	23			0.273	1.89311	1.54212	S	S	10
70	135	0.826	24	1	24	0.826						S	10
71	45	0.396	24	1	24		0.396					S	10
72	45	0.234	24	1	24			0.234	2.08586	1.69231	S	S	10
73	180	0.631	25	1	25	0.631						S	10
74	-135	0.369	25	1	25		0.369					S	10
75	-90	0.374	25	1	25			0.374	1.71003	0.986631	S	S	10
76	26.565	1.275	26	1	26	1.275						M	10
77	-63.435	0.554	26	1	26		0.554					M	10
78	-90	0.21	26	1	26			0.21	2.30144	2.6381	M	M	10
79	-45	0.532	27	1	27	0.532						M	10
80	-135	0.446	27	1	27		0.446					M	10
81	-135	0.24	27	1	27			0.24	1.19283	1.85833	M	M	10
82	161.565	0.837	28	1	28	0.837						S	10
83	-135	0.396	28	1	28		0.396					S	10
84	-90	0.374	28	1	28			0.374	2.11364	1.05882	S	S	10
85	-120.964	0.823	29	1	29	0.823						S	10
86	-56.31	0.486	29	1	29		0.486					S	10
87	-26.565	0.332	29	1	29			0.332	1.69342	1.46386	S	S	10
88	26.565	0.992	30	1	30	0.992						S	10
89	-63.435	0.387	30	1	30		0.387					S	10
90	-63.435	0.23	30	1	30			0.23	2.56331	1.68261	S	S	10
91	-129.806	1.057	31	1	31	1.057						T	10
92	-63.435	0.377	31	1	31		0.377					T	10
93	-45	0.285	31	1	31			0.285	2.80371	1.32281	T	T	10
94	78.69	0.806	32	1	32	0.806						S	10
95	-26.565	0.24	32	1	32		0.24					S	10
96	0	0.257	32	1	32			0.257	3.35833	0.933852	S	S	10
97	45	0.611	33	1	33	0.611						M	10
98	-26.565	0.363	33	1	33		0.363					M	10
99	-45	0.2	33	1	33			0.2	1.6832	1.815	M	M	10
100	7.125	1.076	34	1	34	1.076						M	10
101	-63.435	0.377	34	1	34		0.377					M	10
102	-90	0.21	34	1	34			0.21	2.85411	1.79524	M	M	10
103	-126.87	0.777	35	1	35	0.777						M	10
104	-45	0.332	35	1	35		0.332					M	10
105	0	0.188	35	1	35			0.188	2.34036	1.76596	M	M	10
106	-143.13	0.778	36	1	36	0.778						S	10
107	-45	0.449	36	1	36		0.449					S	10
108	-63.435	0.266	36	1	36			0.266	1.73274	1.68797	S	S	10
109	68.199	0.752	37	1	37	0.752						S	10
110	-45	0.418	37	1	37		0.418					S	10
111	-26.565	0.251	37	1	37			0.251	1.79904	1.66534	S	S	10
112	-126.87	0.622	38	1	38	0.622						S	10
113	-45	0.396	38	1	38		0.396					S	10
114	0	0.235	38	1	38			0.235	1.57071	1.68511	S	S	10
115	57.995	1.355	39	1	39	1.355						M	10
116	-45	0.547	39	1	39		0.547					M	10
117	-26.565	0.251	39	1	39			0.251	2.47715	2.17928	M	M	10
118	-90	0.841	40	1	40	0.841						M	10
119	168.69	0.724	40	1	40		0.724					M	10
120	0	0.35	40	1	40			0.35	1.1616	2.06857	M	M	10
121	126.87	0.721	41	1	41	0.721						S	10
122	-161.565	0.414	41	1	41		0.414					S	10
123	0	0.304	41	1	41			0.304	1.74155	1.36184	S	S	10
124	-90	0.385	42	1	42	0.385						S	10
125	-153.435	0.284	42	1	42		0.284					S	10
126	-135	0.2	42	1	42			0.2	1.35563	1.42	S	S	10
127	-116.565	1.212	43	1	43	1.212						M	10
128	-14.036	0.532	43	1	43		0.532					M	10
129	-26.565	0.253	43	1	43			0.253	2.2782	2.10277	M	M	10
130	66.801	1.034	44	1	44	1.034						T	10
131	-56.31	0.479	44	1	44		0.479					T	10
132	-26.565	0.318	44	1	44			0.318	2.15866	1.50629	T	T	10
133	-120.964	0.794	45	1	45	0.794						S	10
134	-45	0.463	45	1	45		0.463					S	10
135	0	0.295	45	1	45			0.295	1.7149	1.56949	S	S	10
136	129.806	1.163	46	1	46	1.163						T	10
137	-135	0.398	46	1	46		0.398					T	10
138	0	0.235	46	1	46			0.235	2.92211	1.69362	T	T	10
139	-98.13	0.918	47	1	47	0.918						S	10
140	-18.435	0.446	47	1	47		0.446					S	10
141	0	0.28	47	1	47			0.28	2.0583	1.59286	S	S	10
142	111.801	0.702	48	1	48	0.702						M	10
143	-153.435	0.408	48	1	48		0.408					M	10
144	0	0.187	48	1	48			0.187	1.72059	2.18182	M	M	10
145	63.435	0.577	49	1	49	0.577						S	10
146	-26.565	0.285	49	1	49		0.285					S	10
147	135	0.23	49	1	49			0.23	2.02456	1.23913	S	S	10
148	-123.69	0.57	50	1	50	0.57						S	10
149	-26.565	0.402	50	1	50		0.402					S	10
150	-26.565	0.304	50	1	50			0.304	1.41791	1.32237	S	S	10
151	-90	0.514	51	1	51	0.514						S	10
152	0	0.35	51	1	51		0.35					S	10
153	-153.435	0.272	51	1	51			0.272	1.46857	1.28676	S	S	10
154	111.801	0.745	52	1	52	0.745						S	10
155	-153.435	0.295	52	1	52		0.295					S	10
156	45	0.22	52	1	52			0.22	2.52542	1.34091	S	S	10
157	153.435	0.533	53	1	53	0.533						S	10
158	-123.69	0.512	53	1	53		0.512					S	10
159	-135	0.347	53	1	53			0.347	1.04102	1.4755	S	S	10
160	75.964	0.614	54	1	54	0.614						S	10
161	-26.565	0.324	54	1	54		0.324					S	10
162	0	0.304	54	1	54			0.304	1.89506	1.06579	S	S	10
163	-116.565	0.658	55	1	55	0.658						S	10
164	-26.565	0.248	55	1	55		0.248					S	10
165	-26.565	0.261	55	1	55			0.261	2.65323	0.950192	S	S	10
166	-111.801	0.79	56	1	56	0.79						S	10
167	0	0.493	56	1	56		0.493					S	10
168	26.565	0.328	56	1	56			0.328	1.60243	1.50305	S	S	10
169	63.435	0.606	57	1	57	0.606						S	10
170	135	0.453	57	1	57		0.453					S	10
171	-26.565	0.334	57	1	57			0.334	1.33775	1.35629	S	S	10
172	53.13	0.641	58	1	58	0.641						S	10
173	-33.69	0.46	58	1	58		0.46					S	10
174	-26.565	0.289	58	1	58			0.289	1.39348	1.5917	S	S	10
175	-63.435	0.641	59	1	59	0.641						S	10
176	33.69	0.513	59	1	59		0.513					S	10
177	-153.435	0.369	59	1	59			0.369	1.24951	1.39024	S	S	10
178	90	0.495	60	1	60	0.495						S	10
179	0	0.353	60	1	60		0.353					S	10
180	180	0.257	60	1	60			0.257	1.40227	1.37354	S	S	10
181	120.964	0.733	61	1	61	0.733						S	10
182	-146.31	0.481	61	1	61		0.481					S	10
183	180	0.357	61	1	61			0.357	1.52391	1.34734	S	S	10
184	23.962	1.306	62	1	62	1.306						M	10
185	-56.31	0.547	62	1	62		0.547					M	10
186	-90	0.244	62	1	62			0.244	2.38757	2.2418	M	M	10
187	53.13	0.694	63	1	63	0.694						S	10
188	153.435	0.324	63	1	63		0.324					S	10
189	180	0.2	63	1	63			0.2	2.14198	1.62	S	S	10
190	-90	0.799	64	1	64	0.799						M	10
191	0	0.518	64	1	64		0.518					M	10
192	180	0.238	64	1	64			0.238	1.54247	2.17647	M	M	10
193	-135	0.799	65	1	65	0.799						M	10
194	-33.69	0.577	65	1	65		0.577					M	10
195	-45	0.251	65	1	65			0.251	1.38475	2.2988	M	M	10
196	45	0.799	66	1	66	0.799						S	10
197	-45	0.495	66	1	66		0.495					S	10
198	-63.435	0.293	66	1	66			0.293	1.61414	1.68942	S	S	10
199	-123.69	0.479	67	1	67	0.479						S	10
200	-45	0.332	67	1	67		0.332					S	10
201	153.435	0.266	67	1	67			0.266	1.44277	1.24812	S	S	10
202	90	0.958	68	1	68	0.958						M	10
203	-153.435	0.681	68	1	68		0.681					M	10
204	0	0.398	68	1	68			0.398	1.40675	1.71106	M	M	10
205	149.036	0.719	69	1	69	0.719						S	10
206	-135	0.383	69	1	69		0.383					S	10
207	-135	0.297	69	1	69			0.297	1.87728	1.28956	S	S	10
208	-18.435	0.4	70	1	70	0.4						S	10
209	-90	0.238	70	1	70		0.238					S	10
210	-135	0.182	70	1	70			0.182	1.68067	1.30769	S	S	10
211	-53.13	0.693	71	1	71	0.693						S	10
212	-153.435	0.282	71	1	71		0.282					S	10
213	0	0.244	71	1	71			0.244	2.45745	1.15574	S	S	10
214	90	0.568	72	1	72	0.568						M	10
215	0	0.539	72	1	72		0.539					M	10
216	180	0.235	72	1	72			0.235	1.0538	2.29362	M	M	10
217	-26.565	0.557	73	1	73	0.557						S	10
218	33.69	0.481	73	1	73		0.481					S	10
219	-90	0.362	73	1	73			0.362	1.158	1.32873	S	S	10
220	126.87	0.799	74	1	74	0.799						S	10
221	26.565	0.324	74	1	74		0.324					S	10
222	-116.565	0.318	74	1	74			0.318	2.46605	1.01887	S	S	10
223	113.199	1.063	75	1	75	1.063						T	10
224	26.565	0.356	75	1	75		0.356					T	10
225	-153.435	0.261	75	1	75			0.261	2.98596	1.36398	T	T	10
226	-56.31	0.58	76	1	76	0.58						S	10
227	45	0.38	76	1	76		0.38					S	10
228	-135	0.231	76	1	76			0.231	1.52632	1.64502	S	S	10
229	-90	0.469	77	1	77	0.469						M	10
230	18.435	0.429	77	1	77		0.429					M	10
231	-153.435	0.244	77	1	77			0.244	1.09324	1.7582	M	M	10
232	90	0.609	78	1	78	0.609						S	10
233	-45	0.258	78	1	78		0.258					S	10
234	-153.435	0.266	78	1	78			0.266	2.36047	0.969925	S	S	10
235	143.13	0.725	79	1	79	0.725						S	10
236	-135	0.396	79	1	79		0.396					S	10
237	-153.435	0.295	79	1	79			0.295	1.83081	1.34237	S	S	10
238	-53.13	0.668	80	1	80	0.668						S	10
239	26.565	0.418	80	1	80		0.418					S	10
240	180	0.258	80	1	80			0.258	1.59809	1.62016	S	S	10
241	-75.964	0.572	81	1	81	0.572						M	10
242	-161.565	0.446	81	1	81		0.446					M	10
243	180	0.258	81	1	81			0.258	1.28251	1.72868	M	M	10
244	-45	0.413	82	1	82	0.413						S	10
245	-116.565	0.266	82	1	82		0.266					S	10
246	-135	0.178	82	1	82			0.178	1.55263	1.49438	S	S	10
247	-14.036	0.555	83	1	83	0.555						S	10
248	-116.565	0.606	83	1	83		0.606					S	10
249	-116.565	0.408	83	1	83			0.408	0.915842	1.48529	S	S	10
250	125.538	1.205	84	1	84	1.205						T	10
251	161.565	0.493	84	1	84		0.493					T	10
252	-135	0.383	84	1	84			0.383	2.44422	1.28721	T	T	10
253	102.529	1.264	85	1	85	1.264						T	10
254	180	0.362	85	1	85		0.362					T	10
255	-135	0.251	85	1	85			0.251	3.49171	1.44223	T	T	10
256	-135	1.206	86	1	86	1.206						M	10
257	126.87	0.743	86	1	86		0.743					M	10
258	-26.565	0.261	86	1	86			0.261	1.62315	2.84674	M	M	10
259	68.199	0.835	87	1	87	0.835						M	10
260	-45	0.402	87	1	87		0.402					M	10
261	0	0.215	87	1	87			0.215	2.07711	1.86977	M	M	10
262	-45	0.421	88	1	88	0.421						S	10
263	-153.435	0.324	88	1	88		0.324					S	10
264	-153.435	0.313	88	1	88			0.313	1.29938	1.03514	S	S	10
265	98.13	0.963	89	1	89	0.963						M	10
266	-153.435	0.362	89	1	89		0.362					M	10
267	45	0.188	89	1	89			0.188	2.66022	1.92553	M	M	10
268	9.462	0.783	90	1	90	0.783						S	10
269	-63.435	0.324	90	1	90		0.324					S	10
270	-90	0.266	90	1	90			0.266	2.41667	1.21805	S	S	10
271	123.69	0.95	91	1	91	0.95						M	10
272	-146.31	0.574	91	1	91		0.574					M	10
273	26.565	0.209	91	1	91			0.209	1.65505	2.74641	M	M	10
274	0	0.864	92	1	92	0.864						M	10
275	-90	0.562	92	1	92		0.562					M	10
276	-90	0.222	92	1	92			0.222	1.53737	2.53153	M	M	10
277	18.435	0.924	93	1	93	0.924						S	10
278	-45	0.33	93	1	93		0.33					S	10
279	-135	0.198	93	1	93			0.198	2.8	1.66667	S	S	10
280	-168.69	0.623	94	1	94	0.623						M	10
281	-63.435	0.304	94	1	94		0.304					M	10
282	-45	0.165	94	1	94			0.165	2.04934	1.84242	M	M	10
283	-26.565	0.481	95	1	95	0.481						S	10
284	-108.435	0.414	95	1	95		0.414					S	10
285	-135	0.261	95	1	95			0.261	1.16184	1.58621	S	S	10
286	101.31	0.687	96	1	96	0.687						S	10
287	0	0.307	96	1	96		0.307					S	10
288	-153.435	0.238	96	1	96			0.238	2.23779	1.28992	S	S	10
289	-165.964	0.691	97	1	97	0.691						M	10
290	-63.435	0.304	97	1	97		0.304					M	10
291	-90	0.165	97	1	97			0.165	2.27303	1.84242	M	M	10
292	-153.435	0.377	98	1	98	0.377						S	10
293	153.435	0.253	98	1	98		0.253					S	10
294	-90	0.188	98	1	98			0.188	1.49012	1.34574	S	S	10
295	-21.801	0.773	99	1	99	0.773						M	10
296	-104.036	0.525	99	1	99		0.525					M	10
297	-116.565	0.266	99	1	99			0.266	1.47238	1.97368	M	M	10
298	135	0.595	100	1	100	0.595						S	10
299	-135	0.318	100	1	100		0.318					S	10
300	45	0.201	100	1	100			0.201	1.87107	1.58209	S	S	10
301	-63.435	0.597	101	1	101	0.597						S	10
302	-135	0.431	101	1	101		0.431					S	10
303	26.565	0.377	101	1	101			0.377	1.38515	1.14324	S	S	10
304	0	0.584	102	1	102	0.584						S	10
305	-116.565	0.295	102	1	102		0.295					S	10
306	-90	0.193	102	1	102			0.193	1.97966	1.5285	S	S	10
307	172.875	1.136	103	1	103	1.136						M	10
308	180	0.446	103	1	103		0.446					M	10
309	-90	0.235	103	1	103			0.235	2.54709	1.89787	M	M	10
310	180	0.707	104	1	104	0.707						M	10
311	-90	0.328	104	1	104		0.328					M	10
312	-90	0.188	104	1	104			0.188	2.15549	1.74468	M	M	10
313	-14.036	0.637	105	1	105	0.637						S	10
314	-108.435	0.418	105	1	105		0.418					S	10
315	63.435	0.253	105	1	105			0.253	1.52392	1.65217	S	S	10
316	-149.036	0.813	106	1	106	0.813						S	10
317	-45	0.266	106	1	106		0.266					S	10
318	-45	0.314	106	1	106			0.314	3.05639	0.847134	S	S	10
319	-126.87	0.766	107	1	107	0.766						M	10
320	-45	0.58	107	1	107		0.58					M	10
321	135	0.234	107	1	107			0.234	1.32069	2.47863	M	M	10
322	153.435	0.616	108	1	108	0.616						S	10
323	-135	0.35	108	1	108		0.35					S	10
324	-90	0.258	108	1	108			0.258	1.76	1.35659	S	S	10
325	-168.69	0.71	109	1	109	0.71						M	10
326	-45	0.365	109	1	109		0.365					M	10
327	-45	0.178	109	1	109			0.178	1.94521	2.05056	M	M	10
328	153.435	0.711	110	1	110	0.711						S	10
329	-135	0.253	110	1	110		0.253					S	10
330	-135	0.215	110	1	110			0.215	2.81028	1.17674	S	S	10
331	143.13	0.661	111	1	111	0.661						S	10
332	-135	0.396	111	1	111		0.396					S	10
333	63.435	0.266	111	1	111			0.266	1.66919	1.48872	S	S	10
334	-45	0.58	112	1	112	0.58						S	10
335	63.435	0.318	112	1	112		0.318					S	10
336	-135	0.22	112	1	112			0.22	1.8239	1.44545	S	S	10
337	146.31	0.958	113	1	113	0.958						S	10
338	-135	0.369	113	1	113		0.369					S	10
339	-116.565	0.23	113	1	113			0.23	2.59621	1.60435	S	S	10
340	135	0.628	114	1	114	0.628						M	10
341	-135	0.398	114	1	114		0.398					M	10
342	-135	0.234	114	1	114			0.234	1.57789	1.70085	M	M	10
343	141.34	0.921	115	1	115	0.921						S	10
344	-116.565	0.318	115	1	115		0.318					S	10
345	-116.565	0.23	115	1	115			0.23	2.89623	1.38261	S	S	10
346	-33.69	0.545	116	1	116	0.545						S	10
347	45	0.297	116	1	116		0.297					S	10
348	-116.565	0.234	116	1	116			0.234	1.83502	1.26923	S	S	10
349	-158.199	0.794	117	1	117	0.794						S	10
350	-45	0.421	117	1	117		0.421					S	10
351	-45	0.282	117	1	117			0.282	1.88599	1.49291	S	S	10
352	-156.801	1.138	118	1	118	1.138						M	10
353	-75.964	0.542	118	1	118		0.542					M	10
354	116.565	0.253	118	1	118			0.253	2.09963	2.14229	M	M	10
355	-153.435	0.899	119	1	119	0.899						M	10
356	-63.435	0.555	119	1	119		0.555					M	10
357	-63.435	0.313	119	1	119			0.313	1.61982	1.77316	M	M	10
358	-26.565	0.679	120	1	120	0.679						M	10
359	56.31	0.481	120	1	120		0.481					M	10
360	-116.565	0.24	120	1	120			0.24	1.41164	2.00417	M	M	10
361	-173.66	1.248	121	1	121	1.248						T	10
362	-90	0.469	121	1	121		0.469					T	10
363	-90	0.351	121	1	121			0.351	2.66098	1.33618	T	T	10
364	-45	0.693	122	1	122	0.693						S	10
365	45	0.402	122	1	122		0.402					S	10
366	-153.435	0.299	122	1	122			0.299	1.72388	1.34448	S	S	10
367	-45	0.76	123	1	123	0.76						M	10
368	-135	0.561	123	1	123		0.561					M	10
369	-153.435	0.266	123	1	123			0.266	1.35472	2.10902	M	M	10
370	170.538	0.811	124	1	124	0.811						S	10
371	180	0.284	124	1	124		0.284					S	10
372	-90	0.235	124	1	124			0.235	2.85563	1.20851	S	S	10
373	-144.462	1.257	125	1	125	1.257						T	10
374	-71.565	0.421	125	1	125		0.421					T	10
375	-90	0.304	125	1	125			0.304	2.98575	1.38487	T	T	10
376	-141.34	0.958	126	1	126	0.958						S	10
377	-45	0.453	126	1	126		0.453					S	10
378	116.565	0.357	126	1	126			0.357	2.11479	1.26891	S	S	10
379	-135	0.942	127	1	127	0.942						M	10
380	-33.69	0.479	127	1	127		0.479					M	10
381	153.435	0.272	127	1	127			0.272	1.9666	1.76103	M	M	10
382	146.31	0.93	128	1	128	0.93						S	10
383	-161.565	0.461	128	1	128		0.461					S	10
384	-116.565	0.324	128	1	128			0.324	2.01735	1.42284	S	S	10
385	-90	0.631	129	1	129	0.631						M	10
386	0	0.527	129	1	129		0.527					M	10
387	0	0.142	129	1	129			0.142	1.19734	3.71127	M	M	10
388	-153.435	0.649	130	1	130	0.649						M	10
389	-45	0.463	130	1	130		0.463					M	10
390	-90	0.257	130	1	130			0.257	1.40173	1.80156	M	M	10
391	71.565	1.322	131	1	131	1.322						T	10
392	-33.69	0.512	131	1	131		0.512					T	10
393	0	0.35	131	1	131			0.35	2.58203	1.46286	T	T	10
394	-45	0.496	132	1	132	0.496						S	10
395	26.565	0.408	132	1	132		0.408					S	10
396	-135	0.264	132	1	132			0.264	1.21569	1.54545	S	S	10
397	-161.565	0.525	133	1	133	0.525						M	10
398	-75.964	0.555	133	1	133		0.555					M	10
399	-90	0.258	133	1	133			0.258	0.945946	2.15116	M	M	10
400	99.462	0.889	134	1	134	0.889						M	10
401	33.69	0.545	134	1	134		0.545					M	10
402	180	0.284	134	1	134			0.284	1.63119	1.91901	M	M	10
403	-63.435	0.95	135	1	135	0.95						S	10
404	0	0.491	135	1	135		0.491					S	10
405	-116.565	0.365	135	1	135			0.365	1.93483	1.34521	S	S	10
406	105.945	0.925	136	1	136	0.925						M	10
407	-165.964	0.542	136	1	136		0.542					M	10
408	180	0.238	136	1	136			0.238	1.70664	2.27731	M	M	10
409	146.31	0.617	137	1	137	0.617						M	10
410	-153.435	0.416	137	1	137		0.416					M	10
411	-135	0.234	137	1	137			0.234	1.48317	1.77778	M	M	10
412	135	0.743	138	1	138	0.743						S	10
413	-135	0.413	138	1	138		0.413					S	10
414	-135	0.264	138	1	138			0.264	1.79903	1.56439	S	S	10
415	143.13	0.697	139	1	139	0.697						M	10
416	45	0.383	139	1	139		0.383					M	10
417	45	0.201	139	1	139			0.201	1.81984	1.90547	M	M	10
418	-59.036	0.859	140	1	140	0.859						M	10
419	33.69	0.47	140	1	140		0.47					M	10
420	26.565	0.244	140	1	140			0.244	1.82766	1.92623	M	M	10
421	146.31	0.586	141	1	141	0.586						S	10
422	63.435	0.389	141	1	141		0.389					S	10
423	-116.565	0.253	141	1	141			0.253	1.50643	1.53755	S	S	10
424	-39.806	0.978	142	1	142	0.978						M	10
425	-126.87	0.649	142	1	142		0.649					M	10
426	-135	0.33	142	1	142			0.33	1.50693	1.96667	M	M	10
427	135	0.565	143	1	143	0.565						S	10
428	-153.435	0.347	143	1	143		0.347					S	10
429	-116.565	0.22	143	1	143			0.22	1.62824	1.57727	S	S	10
430	-153.435	1.107	144	1	144	1.107						M	10
431	-78.69	0.591	144	1	144		0.591					M	10
432	-90	0.266	144	1	144			0.266	1.8731	2.2218	M	M	10
433	-11.31	0.748	145	1	145	0.748						S	10
434	-90	0.307	145	1	145		0.307					S	10
435	-90	0.234	145	1	145			0.234	2.43648	1.31197	S	S	10
436	135	0.514	146	1	146	0.514						S	10
437	-153.435	0.383	146	1	146		0.383					S	10
438	-153.435	0.234	146	1	146			0.234	1.34204	1.63675	S	S	10
439	180	0.771	147	1	147	0.771						M	10
440	-56.31	0.547	147	1	147		0.547					M	10
441	-116.565	0.272	147	1	147			0.272	1.40951	2.01103	M	M	10
442	135	0.538	148	1	148	0.538						M	10
443	18.435	0.516	148	1	148		0.516					M	10
444	45	0.178	148	1	148			0.178	1.04264	2.89888	M	M	10
445	-53.13	0.682	149	1	149	0.682						M	10
446	26.565	0.616	149	1	149		0.616					M	10
447	-135	0.248	149	1	149			0.248	1.10714	2.48387	M	M	10
448	-36.87	0.748	150	1	150	0.748						M	10
449	-126.87	0.766	150	1	150		0.766					M	10
450	-116.565	0.365	150	1	150			0.365	0.976501	2.09863	M	M	10
451	126.87	1.464	151	1	151	1.464						T	10
452	-33.69	0.565	151	1	151		0.565					T	10
453	-153.435	0.439	151	1	151			0.439	2.59115	1.28702	T	T	10
454	-30.964	0.79	152	1	152	0.79						M	10
455	-123.69	0.603	152	1	152		0.603					M	10
456	-135	0.281	152	1	152			0.281	1.31012	2.14591	M	M	10
457	-45	0.611	153	1	153	0.611						S	10
458	56.31	0.434	153	1	153		0.434					S	10
459	45	0.281	153	1	153			0.281	1.40783	1.54448	S	S	10
460	146.31	0.585	154	1	154	0.585						M	10
461	-108.435	0.402	154	1	154		0.402					M	10
462	-153.435	0.231	154	1	154			0.231	1.45522	1.74026	M	M	10
463	-56.31	0.538	155	1	155	0.538						M	10
464	33.69	0.574	155	1	155		0.574					M	10
465	-153.435	0.304	155	1	155			0.304	0.937282	1.88816	M	M	10
466	116.565	0.982	156	1	156	0.982						S	10
467	-161.565	0.429	156	1	156		0.429					S	10
468	33.69	0.461	156	1	156			0.461	2.28904	0.930586	S	S	10
469	-68.199	0.701	157	1	157	0.701						M	10
470	45	0.875	157	1	157		0.875					M	10
471	-161.565	0.421	157	1	157			0.421	0.801143	2.07838	M	M	10
472	-101.31	0.709	158	1	158	0.709						S	10
473	-18.435	0.481	158	1	158		0.481					S	10
474	0	0.312	158	1	158			0.312	1.47401	1.54167	S	S	10
475	135	0.677	159	1	159	0.677						M	10
476	-146.31	0.577	159	1	159		0.577					M	10
477	180	0.318	159	1	159			0.318	1.17331	1.81447	M	M	10
478	71.565	0.825	160	1	160	0.825						M	10
479	-33.69	0.402	160	1	160		0.402					M	10
480	0	0.2	160	1	160			0.2	2.05224	2.01	M	M	10
481	146.31	0.597	161	1	161	0.597						M	10
482	36.87	0.813	161	1	161		0.813					M	10
483	-153.435	0.365	161	1	161			0.365	0.734317	2.2274	M	M	10
484	-45	0.598	162	1	162	0.598						S	10
485	-135	0.416	162	1	162		0.416					S	10
486	-90	0.281	162	1	162			0.281	1.4375	1.48043	S	S	10
487	135	0.963	163	1	163	0.963						M	10
488	36.87	0.664	163	1	163		0.664					M	10
489	26.565	0.282	163	1	163			0.282	1.4503	2.35461	M	M	10
490	-113.199	1.096	164	1	164	1.096						M	10
491	-33.69	0.574	164	1	164		0.574					M	10
492	-26.565	0.273	164	1	164			0.273	1.90941	2.10256	M	M	10
493	135	1.172	165	1	165	1.172						T	10
494	-135	0.66	165	1	165		0.66					T	10
495	-135	0.446	165	1	165			0.446	1.77576	1.47982	T	T	10
496	140.194	1.026	166	1	166	1.026						M	10
497	-135	0.58	166	1	166		0.58					M	10
498	45	0.201	166	1	166			0.201	1.76897	2.88557	M	M	10
499	120.964	0.785	167	1	167	0.785						S	10
500	18.435	0.459	167	1	167		0.459					S	10
501	-153.435	0.365	167	1	167			0.365	1.71024	1.25753	S	S	10
502	-33.69	0.963	168	1	168	0.963						S	10
503	-135	0.495	168	1	168		0.495					S	10
504	45	0.389	168	1	168			0.389	1.94545	1.27249	S	S	10
505	131.186	1.393	169	1	169	1.393						T	10
506	-149.036	0.804	169	1	169		0.804					T	10
507	33.69	0.513	169	1	169			0.513	1.73259	1.56725	T	T	10
508	-45	0.512	170	1	170	0.512						S	10
509	-123.69	0.431	170	1	170		0.431					S	10
510	-135	0.297	170	1	170			0.297	1.18794	1.45118	S	S	10
511	-45	0.694	171	1	171	0.694						S	10
512	45	0.578	171	1	171		0.578					S	10
513	-153.435	0.356	171	1	171			0.356	1.20069	1.6236	S	S	10
1	-30.964	0.798	172	2	1	0.798						M	10
2	-123.69	0.415	172	2	1		0.415					M	10
3	45	0.22	172	2	1			0.22	1.92289	1.88636	M	M	10
4	-26.565	0.628	173	2	2	0.628						S	10
5	-123.69	0.383	173	2	2		0.383					S	10
6	-135	0.248	173	2	2			0.248	1.63969	1.54435	S	S	10
7	-6.34	1.366	174	2	3	1.366						T	10
8	-116.565	0.292	174	2	3		0.292					T	10
9	-90	0.244	174	2	3			0.244	4.67808	1.19672	T	T	10
10	-33.69	0.589	175	2	4	0.589						S	10
11	-116.565	0.334	175	2	4		0.334					S	10
12	-153.435	0.266	175	2	4			0.266	1.76347	1.25564	S	S	10
13	-11.31	1.474	176	2	5	1.474						T	10
14	-108.435	0.413	176	2	5		0.413					T	10
15	90	0.258	176	2	5			0.258	3.56901	1.60078	T	T	10
16	-18.435	0.879	177	2	6	0.879						S	10
17	63.435	0.347	177	2	6		0.347					S	10
18	-135	0.211	177	2	6			0.211	2.53314	1.64455	S	S	10
19	175.914	1.919	178	2	7	1.919						M	10
20	-90	0.421	178	2	7		0.421					M	10
21	-90	0.238	178	2	7			0.238	4.55819	1.76891	M	M	10
22	-119.745	1.153	179	2	8	1.153						M	10
23	-33.69	0.909	179	2	8		0.909					M	10
24	135	0.199	179	2	8			0.199	1.26843	4.56784	M	M	10
25	-26.565	1.274	180	2	9	1.274						M	10
26	56.31	0.512	180	2	9		0.512					M	10
27	45	0.264	180	2	9			0.264	2.48828	1.93939	M	M	10
28	-26.565	0.836	181	2	10	0.836						S	10
29	26.565	0.33	181	2	10		0.33					S	10
30	45	0.261	181	2	10			0.261	2.53333	1.26437	S	S	10
31	-15.945	1.085	182	2	11	1.085						M	10
32	63.435	0.408	182	2	11		0.408					M	10
33	-135	0.165	182	2	11			0.165	2.65931	2.47273	M	M	10
34	-41.634	1.673	183	2	12	1.673						T	10
35	-108.435	0.345	183	2	12		0.345					T	10
36	26.565	0.252	183	2	12			0.252	4.84928	1.36905	T	T	10
37	-36.87	0.747	184	2	13	0.747						M	10
38	26.565	0.233	184	2	13		0.233					M	10
39	90	0.136	184	2	13			0.136	3.20601	1.71324	M	M	10
40	-30.964	0.841	185	2	14	0.841						M	10
41	45	0.661	185	2	14		0.661					M	10
42	26.565	0.252	185	2	14			0.252	1.27231	2.62302	M	M	10
43	-45	0.611	186	2	15	0.611						S	10
44	45	0.396	186	2	15		0.396					S	10
45	45	0.248	186	2	15			0.248	1.54293	1.59677	S	S	10
46	123.69	0.999	187	2	16	0.999						M	10
47	-135	0.434	187	2	16		0.434					M	10
48	-135	0.199	187	2	16			0.199	2.30184	2.1809	M	M	10
49	-33.69	1.512	188	2	17	1.512						T	10
50	-135	0.364	188	2	17		0.364					T	10
51	-135	0.281	188	2	17			0.281	4.15385	1.29537	T	T	10
52	-123.69	0.505	189	2	18	0.505						S	10
53	-26.565	0.272	189	2	18		0.272					S	10
54	180	0.178	189	2	18			0.178	1.85662	1.52809	S	S	10
55	111.801	0.793	190	2	19	0.793						M	10
56	180	0.373	190	2	19		0.373					M	10
57	45	0.201	190	2	19			0.201	2.12601	1.85572	M	M	10
58	-15.945	1.071	191	2	20	1.071						T	10
59	-116.565	0.345	191	2	20		0.345					T	10
60	45	0.233	191	2	20			0.233	3.10435	1.48069	T	T	10
61	-45	0.843	192	2	21	0.843						S	10
62	45	0.446	192	2	21		0.446					S	10
63	26.565	0.324	192	2	21			0.324	1.89013	1.37654	S	S	10
64	-45	0.415	193	2	22	0.415						S	10
65	-135	0.332	193	2	22		0.332					S	10
66	45	0.215	193	2	22			0.215	1.25	1.54419	S	S	10
67	141.34	0.861	194	2	23	0.861						S	10
68	45	0.369	194	2	23		0.369					S	10
69	-153.435	0.22	194	2	23			0.22	2.33333	1.67727	S	S	10
70	146.31	1.017	195	2	24	1.017						T	10
71	71.565	0.421	195	2	24		0.421					T	10
72	-153.435	0.289	195	2	24			0.289	2.41568	1.45675	T	T	10
73	143.13	0.831	196	2	25	0.831						S	10
74	-135	0.383	196	2	25		0.383					S	10
75	-153.435	0.251	196	2	25			0.251	2.16971	1.5259	S	S	10
76	153.435	0.616	197	2	26	0.616						S	10
77	-153.435	0.299	197	2	26		0.299					S	10
78	180	0.261	197	2	26			0.261	2.0602	1.14559	S	S	10
79	0	0.562	198	2	27	0.562						S	10
80	71.565	0.334	198	2	27		0.334					S	10
81	-90	0.211	198	2	27			0.211	1.68263	1.58294	S	S	10
82	-56.31	0.467	199	2	28	0.467						S	10
83	-116.565	0.332	199	2	28		0.332					S	10
84	-153.435	0.244	199	2	28			0.244	1.40663	1.36066	S	S	10
85	105.945	0.979	200	2	29	0.979						S	10
86	26.565	0.355	200	2	29		0.355					S	10
87	153.435	0.258	200	2	29			0.258	2.75775	1.37597	S	S	10
88	-56.31	1.029	201	2	30	1.029						T	10
89	18.435	0.408	201	2	30		0.408					T	10
90	-135	0.252	201	2	30			0.252	2.52206	1.61905	T	T	10
91	116.565	0.909	202	2	31	0.909						M	10
92	8.13	1.048	202	2	31		1.048					M	10
93	26.565	0.313	202	2	31			0.313	0.867366	3.34824	M	M	10
94	-71.565	0.451	203	2	32	0.451						S	10
95	14.036	0.555	203	2	32		0.555					S	10
96	18.435	0.408	203	2	32			0.408	0.812613	1.36029	S	S	10
97	135	0.545	204	2	33	0.545						S	10
98	-153.435	0.363	204	2	33		0.363					S	10
99	-153.435	0.313	204	2	33			0.313	1.50138	1.15974	S	S	10
100	153.435	1.263	205	2	34	1.263						M	10
101	45	0.481	205	2	34		0.481					M	10
102	63.435	0.221	205	2	34			0.221	2.62578	2.17647	M	M	10
103	130.601	1.289	206	2	35	1.289						T	10
104	-161.565	0.385	206	2	35		0.385					T	10
105	-135	0.272	206	2	35			0.272	3.34805	1.41544	T	T	10
106	-48.814	1.429	207	2	36	1.429						M	10
107	56.31	0.463	207	2	36		0.463					M	10
108	-153.435	0.252	207	2	36			0.252	3.08639	1.8373	M	M	10
109	56.31	1.031	208	2	37	1.031						M	10
110	-53.13	0.611	208	2	37		0.611					M	10
111	-18.435	0.353	208	2	37			0.353	1.6874	1.73088	M	M	10
112	-19.983	1.573	209	2	38	1.573						M	10
113	-123.69	0.47	209	2	38		0.47					M	10
114	63.435	0.261	209	2	38			0.261	3.34681	1.80077	M	M	10
115	-56.31	0.479	210	2	39	0.479						S	10
116	-135	0.383	210	2	39		0.383					S	10
117	45	0.365	210	2	39			0.365	1.25065	1.04932	S	S	10
118	144.462	1.316	211	2	40	1.316						T	10
119	45	0.401	211	2	40		0.401					T	10
120	-153.435	0.251	211	2	40			0.251	3.2818	1.59761	T	T	10
121	149.036	0.732	212	2	41	0.732						S	10
122	71.565	0.399	212	2	41		0.399					S	10
123	26.565	0.376	212	2	41			0.376	1.83459	1.06117	S	S	10
124	150.255	1.129	213	2	42	1.129						M	10
125	-153.435	0.347	213	2	42		0.347					M	10
126	-116.565	0.188	213	2	42			0.188	3.2536	1.84574	M	M	10
127	-71.565	0.413	214	2	43	0.413						M	10
128	180	0.614	214	2	43		0.614					M	10
129	180	0.307	214	2	43			0.307	0.672638	2	M	M	10
130	71.565	0.377	215	2	44	0.377						S	10
131	-18.435	0.46	215	2	44		0.46					S	10
132	180	0.304	215	2	44			0.304	0.819565	1.51316	S	S	10
133	170.538	0.783	216	2	45	0.783						M	10
134	-135	0.383	216	2	45		0.383					M	10
135	-90	0.14	216	2	45			0.14	2.04439	2.73571	M	M	10
136	128.66	0.876	217	2	46	0.876						M	10
137	45	0.499	217	2	46		0.499					M	10
138	45	0.201	217	2	46			0.201	1.75551	2.48259	M	M	10
139	-36.87	0.773	218	2	47	0.773						M	10
140	-135	0.347	218	2	47		0.347					M	10
141	-135	0.201	218	2	47			0.201	2.22767	1.72637	M	M	10
142	-11.31	0.849	219	2	48	0.849						M	10
143	63.435	0.686	219	2	48		0.686					M	10
144	-90	0.304	219	2	48			0.304	1.23761	2.25658	M	M	10
145	135	0.793	220	2	49	0.793						S	10
146	-153.435	0.355	220	2	49		0.355					S	10
147	-161.565	0.391	220	2	49			0.391	2.2338	0.907928	S	S	10
148	149.036	1.65	221	2	50	1.65						T	10
149	63.435	0.314	221	2	50		0.314					T	10
150	0	0.244	221	2	50			0.244	5.25478	1.28689	T	T	10
151	165.964	1.203	222	2	51	1.203						M	10
152	-116.565	0.388	222	2	51		0.388					M	10
153	63.435	0.221	222	2	51			0.221	3.10052	1.75566	M	M	10
154	142.125	1.541	223	2	52	1.541						T	10
155	45	0.281	223	2	52		0.281					T	10
156	-116.565	0.289	223	2	52			0.289	5.48399	0.972318	T	T	10
157	-18.435	0.937	224	2	53	0.937						S	10
158	45	0.421	224	2	53		0.421					S	10
159	-90	0.266	224	2	53			0.266	2.22565	1.58271	S	S	10
160	-90	0.572	225	2	54	0.572						S	10
161	0	0.444	225	2	54		0.444					S	10
162	-18.435	0.347	225	2	54			0.347	1.28829	1.27954	S	S	10
163	-33.69	0.388	226	2	55	0.388						M	10
164	-116.565	0.334	226	2	55		0.334					M	10
165	-135	0.168	226	2	55			0.168	1.16168	1.9881	M	M	10
166	-36.87	0.7	227	2	56	0.7						S	10
167	45	0.266	227	2	56		0.266					S	10
168	-135	0.215	227	2	56			0.215	2.63158	1.23721	S	S	10
169	-14.036	0.561	228	2	57	0.561						S	10
170	26.565	0.347	228	2	57		0.347					S	10
171	-90	0.211	228	2	57			0.211	1.61671	1.64455	S	S	10
172	161.565	0.408	229	2	58	0.408						S	10
173	-153.435	0.282	229	2	58		0.282					S	10
174	26.565	0.266	229	2	58			0.266	1.44681	1.06015	S	S	10
175	-36.87	0.608	230	2	59	0.608						M	10
176	26.565	0.33	230	2	59		0.33					M	10
177	-135	0.182	230	2	59			0.182	1.84242	1.81319	M	M	10
178	-51.34	0.874	231	2	60	0.874						M	10
179	-161.565	0.429	231	2	60		0.429					M	10
180	0	0.221	231	2	60			0.221	2.0373	1.94118	M	M	10
181	141.34	0.98	232	2	61	0.98						S	10
182	-135	0.314	232	2	61		0.314					S	10
183	-135	0.22	232	2	61			0.22	3.12102	1.42727	S	S	10
184	149.036	1.593	233	2	62	1.593						T	10
185	63.435	0.38	233	2	62		0.38					T	10
186	-116.565	0.282	233	2	62			0.282	4.19211	1.34752	T	T	10
187	128.66	0.944	234	2	63	0.944						M	10
188	26.565	0.324	234	2	63		0.324					M	10
189	180	0.178	234	2	63			0.178	2.91358	1.82022	M	M	10
190	159.444	1.181	235	2	64	1.181						T	10
191	-116.565	0.266	235	2	64		0.266					T	10
192	-90	0.235	235	2	64			0.235	4.43985	1.13191	T	T	10
193	161.565	1.302	236	2	65	1.302						M	10
194	-116.565	0.428	236	2	65		0.428					M	10
195	-135	0.165	236	2	65			0.165	3.04206	2.59394	M	M	10
196	147.995	1.294	237	2	66	1.294						T	10
197	63.435	0.332	237	2	66		0.332					T	10
198	-45	0.345	237	2	66			0.345	3.89759	0.962319	T	T	10
199	33.69	1.069	238	2	67	1.069						M	10
200	-56.31	0.496	238	2	67		0.496					M	10
201	-63.435	0.285	238	2	67			0.285	2.15524	1.74035	M	M	10
202	-21.801	0.764	239	2	68	0.764						M	10
203	68.199	0.72	239	2	68		0.72					M	10
204	-135	0.248	239	2	68			0.248	1.06111	2.90323	M	M	10
205	38.66	0.975	240	2	69	0.975						S	10
206	-71.565	0.413	240	2	69		0.413					S	10
207	-26.565	0.307	240	2	69			0.307	2.36077	1.34528	S	S	10
208	8.13	1.036	241	2	70	1.036						M	10
209	-90	0.373	241	2	70		0.373					M	10
210	90	0.211	241	2	70			0.211	2.77748	1.76777	M	M	10
211	0	0.653	242	2	71	0.653						M	10
212	-90	0.56	242	2	71		0.56					M	10
213	90	0.187	242	2	71			0.187	1.16607	2.99465	M	M	10
214	180	1.447	243	2	72	1.447						T	10
215	-90	0.443	243	2	72		0.443					T	10
216	-63.435	0.284	243	2	72			0.284	3.26637	1.55986	T	T	10
217	-4.399	1.83	244	2	73	1.83						M	10
218	-104.036	0.526	244	2	73		0.526					M	10
219	-135	0.273	244	2	73			0.273	3.47909	1.92674	M	M	10
220	21.801	0.73	245	2	74	0.73						S	10
221	-56.31	0.57	245	2	74		0.57					S	10
222	90	0.436	245	2	74			0.436	1.2807	1.30734	S	S	10
223	-45	0.529	246	2	75	0.529						S	10
224	45	0.729	246	2	75		0.729					S	10
225	-158.199	0.751	246	2	75			0.751	0.725652	0.970706	S	S	10
226	11.31	0.731	247	2	76	0.731						M	10
227	-26.565	0.616	247	2	76		0.616					M	10
228	-90	0.187	247	2	76			0.187	1.18669	3.29412	M	M	10
229	-14.036	1.16	248	2	77	1.16						T	10
230	-108.435	0.399	248	2	77		0.399					T	10
231	-135	0.266	248	2	77			0.266	2.90727	1.5	T	T	10
232	158.199	0.731	249	2	78	0.731						S	10
233	-111.801	0.657	249	2	78		0.657					S	10
234	-90	0.42	249	2	78			0.42	1.11263	1.56429	S	S	10
235	-14.036	0.494	250	2	79	0.494						M	10
236	-113.199	1.034	250	2	79		1.034					M	10
237	56.31	0.453	250	2	79			0.453	0.477756	2.28256	M	M	10
238	162.897	1.76	251	2	80	1.76						T	10
239	-123.69	0.386	251	2	80		0.386					T	10
240	-116.565	0.261	251	2	80			0.261	4.55959	1.47893	T	T	10
241	99.462	0.825	252	2	81	0.825						S	10
242	0	0.472	252	2	81		0.472					S	10
243	26.565	0.374	252	2	81			0.374	1.74788	1.26203	S	S	10
244	-45	0.611	253	2	82	0.611						S	10
245	-153.435	0.553	253	2	82		0.553					S	10
246	-161.565	0.399	253	2	82			0.399	1.10488	1.38596	S	S	10
247	-45	1.221	254	2	83	1.221						T	10
248	-135	0.415	254	2	83		0.415					T	10
249	-146.31	0.495	254	2	83			0.495	2.94217	0.838384	T	T	10
250	11.31	0.71	255	2	84	0.71						S	10
251	-63.435	0.626	255	2	84		0.626					S	10
252	-90	0.49	255	2	84			0.49	1.13419	1.27755	S	S	10
253	-45	0.714	256	2	85	0.714						S	10
254	-143.13	0.784	256	2	85		0.784					S	10
255	30.964	0.738	256	2	85			0.738	0.910714	1.06233	S	S	10
256	-36.87	1.47	257	2	86	1.47						T	10
257	-123.69	0.501	257	2	86		0.501					T	10
258	-116.565	0.324	257	2	86			0.324	2.93413	1.5463	T	T	10
259	146.31	1.061	258	2	87	1.061						T	10
260	-135	0.364	258	2	87		0.364					T	10
261	-108.435	0.385	258	2	87			0.385	2.91484	0.945455	T	T	10
262	-135	0.99	259	2	88	0.99						S	10
263	-56.31	0.486	259	2	88		0.486					S	10
264	-26.565	0.292	259	2	88			0.292	2.03704	1.66438	S	S	10
265	-90	0.888	260	2	89	0.888						S	10
266	-135	0.565	260	2	89		0.565					S	10
267	0	0.35	260	2	89			0.35	1.57168	1.61429	S	S	10
268	68.199	0.73	261	2	90	0.73						M	10
269	-45	0.467	261	2	90		0.467					M	10
270	-26.565	0.244	261	2	90			0.244	1.56317	1.91393	M	M	10
271	168.69	1.382	262	2	91	1.382						M	10
272	-116.565	0.595	262	2	91		0.595					M	10
273	-90	0.328	262	2	91			0.328	2.32269	1.81402	M	M	10
274	149.036	0.848	263	2	92	0.848						M	10
275	-143.13	0.705	263	2	92		0.705					M	10
276	33.69	0.397	263	2	92			0.397	1.20284	1.77582	M	M	10
277	141.34	0.933	264	2	93	0.933						S	10
278	-135	0.467	264	2	93		0.467					S	10
279	-135	0.43	264	2	93			0.43	1.99786	1.08605	S	S	10
280	-33.69	0.529	265	2	94	0.529						S	10
281	45	0.616	265	2	94		0.616					S	10
282	-153.435	0.672	265	2	94			0.672	0.858766	0.916667	S	S	10
283	-11.31	0.691	266	2	95	0.691						S	10
284	63.435	0.386	266	2	95		0.386					S	10
285	90	0.233	266	2	95			0.233	1.79016	1.65665	S	S	10
286	-5.194	1.581	267	2	96	1.581						T	10
287	-90	0.499	267	2	96		0.499					T	10
288	-116.565	0.34	267	2	96			0.34	3.16834	1.46765	T	T	10
289	174.806	1.591	268	2	97	1.591						T	10
290	-63.435	0.33	268	2	97		0.33					T	10
291	-90	0.446	268	2	97			0.446	4.82121	0.73991	T	T	10
292	153.435	1.829	269	2	98	1.829						M	10
293	-128.66	0.795	269	2	98		0.795					M	10
294	-116.565	0.273	269	2	98			0.273	2.30063	2.91209	M	M	10
295	-45	0.793	270	2	99	0.793						S	10
296	-135	0.248	270	2	99		0.248					S	10
297	-153.435	0.266	270	2	99			0.266	3.19758	0.932331	S	S	10
298	-21.801	1.504	271	2	100	1.504						T	10
299	-90	0.541	271	2	100		0.541					T	10
300	-135	0.376	271	2	100			0.376	2.78004	1.43883	T	T	10
301	161.565	0.365	272	2	101	0.365						S	10
302	90	0.199	272	2	101		0.199					S	10
303	-135	0.215	272	2	101			0.215	1.83417	0.925581	S	S	10
304	143.973	1.872	273	2	102	1.872						T	10
305	63.435	0.304	273	2	102		0.304					T	10
306	-135	0.248	273	2	102			0.248	6.15789	1.22581	T	T	10
307	8.13	0.984	274	2	103	0.984						M	10
308	-90	0.515	274	2	103		0.515					M	10
309	-90	0.233	274	2	103			0.233	1.91068	2.2103	M	M	10
310	180	1.657	275	2	104	1.657						T	10
311	-90	0.353	275	2	104		0.353					T	10
312	-90	0.21	275	2	104			0.21	4.69405	1.68095	T	T	10
313	-39.806	1.025	276	2	105	1.025						T	10
314	-116.565	0.332	276	2	105		0.332					T	10
315	45	0.233	276	2	105			0.233	3.08735	1.42489	T	T	10
316	-33.69	0.492	277	2	106	0.492						S	10
317	-123.69	0.583	277	2	106		0.583					S	10
318	-123.69	0.486	277	2	106			0.486	0.843911	1.19959	S	S	10
319	153.435	0.637	278	2	107	0.637						S	10
320	-135	0.314	278	2	107		0.314					S	10
321	-135	0.304	278	2	107			0.304	2.02866	1.03289	S	S	10
322	-30.964	0.757	279	2	108	0.757						S	10
323	-135	0.299	279	2	108		0.299					S	10
324	-135	0.261	279	2	108			0.261	2.53177	1.14559	S	S	10
325	-51.34	0.831	280	2	109	0.831						S	10
326	26.565	0.334	280	2	109		0.334					S	10
327	45	0.285	280	2	109			0.285	2.48802	1.17193	S	S	10
328	-33.69	0.499	281	2	110	0.499						S	10
329	-116.565	0.345	281	2	110		0.345					S	10
330	-135	0.266	281	2	110			0.266	1.44638	1.29699	S	S	10
331	125.538	1.262	282	2	111	1.262						T	10
332	-153.435	0.585	282	2	111		0.585					T	10
333	45	0.401	282	2	111			0.401	2.15726	1.45885	T	T	10
334	-59.036	0.861	283	2	112	0.861						S	10
335	45	0.76	283	2	112		0.76					S	10
336	-161.565	0.47	283	2	112			0.47	1.13289	1.61702	S	S	10
337	150.255	1.121	284	2	113	1.121						M	10
338	-135	0.613	284	2	113		0.613					M	10
339	-135	0.285	284	2	113			0.285	1.82871	2.15088	M	M	10
340	0	0.747	285	2	114	0.747						S	10
341	-90	0.303	285	2	114		0.303					S	10
342	90	0.238	285	2	114			0.238	2.46535	1.27311	S	S	10
343	-18.435	0.898	286	2	115	0.898						M	10
344	-135	0.598	286	2	115		0.598					M	10
345	-116.565	0.337	286	2	115			0.337	1.50167	1.77448	M	M	10
346	108.435	0.48	287	2	116	0.48						S	10
347	-153.435	0.337	287	2	116		0.337					S	10
348	26.565	0.324	287	2	116			0.324	1.42433	1.04012	S	S	10
349	135	0.557	288	2	117	0.557						S	10
350	-146.31	0.486	288	2	117		0.486					S	10
351	-161.565	0.397	288	2	117			0.397	1.14609	1.22418	S	S	10
352	150.255	1.121	289	2	118	1.121						M	10
353	-111.801	0.637	289	2	118		0.637					M	10
354	-135	0.252	289	2	118			0.252	1.75981	2.52778	M	M	10
355	11.31	0.75	290	2	119	0.75						M	10
356	-90	0.98	290	2	119		0.98					M	10
357	-71.565	0.328	290	2	119			0.328	0.765306	2.9878	M	M	10
358	141.34	1.84	291	2	120	1.84						T	10
359	-153.435	0.364	291	2	120		0.364					T	10
360	45	0.266	291	2	120			0.266	5.05495	1.36842	T	T	10
361	161.565	1.392	292	2	121	1.392						T	10
362	-90	0.273	292	2	121		0.273					T	10
363	-90	0.221	292	2	121			0.221	5.0989	1.23529	T	T	10
364	180	1.354	293	2	122	1.354						M	10
365	-71.565	0.476	293	2	122		0.476					M	10
366	-90	0.258	293	2	122			0.258	2.84454	1.84496	M	M	10
367	141.34	0.933	294	2	123	0.933						M	10
368	45	0.448	294	2	123		0.448					M	10
369	-135	0.252	294	2	123			0.252	2.08259	1.77778	M	M	10
370	-45	0.551	295	2	124	0.551						S	10
371	-116.565	0.345	295	2	124		0.345					S	10
372	-135	0.266	295	2	124			0.266	1.5971	1.29699	S	S	10
373	-146.31	0.948	296	2	125	0.948						S	10
374	-45	0.347	296	2	125		0.347					S	10
375	-90	0.397	296	2	125			0.397	2.73199	0.874055	S	S	10
376	-172.875	1.152	297	2	126	1.152						T	10
377	-90	0.351	297	2	126		0.351					T	10
378	-90	0.303	297	2	126			0.303	3.28205	1.15842	T	T	10
379	167.471	1.396	298	2	127	1.396						T	10
380	-116.565	0.557	298	2	127		0.557					T	10
381	-116.565	0.388	298	2	127			0.388	2.50628	1.43557	T	T	10
382	0	1.681	299	2	128	1.681						T	10
383	-75.964	0.585	299	2	128		0.585					T	10
384	-90	0.362	299	2	128			0.362	2.8735	1.61602	T	T	10
385	156.801	1.002	300	2	129	1.002						M	10
386	-146.31	0.545	300	2	129		0.545					M	10
387	-116.565	0.289	300	2	129			0.289	1.83853	1.88581	M	M	10
388	-54.462	1.223	301	2	130	1.223						T	10
389	-123.69	0.462	301	2	130		0.462					T	10
390	-153.435	0.356	301	2	130			0.356	2.64719	1.29775	T	T	10
391	5.711	1.423	302	2	131	1.423						M	10
392	116.565	0.635	302	2	131		0.635					M	10
393	-116.565	0.355	302	2	131			0.355	2.24094	1.78873	M	M	10
394	-90	0.75	303	2	132	0.75						S	10
395	0	0.537	303	2	132		0.537					S	10
396	0	0.373	303	2	132			0.373	1.39665	1.43968	S	S	10
397	146.31	1.074	304	2	133	1.074						T	10
398	-135	0.397	304	2	133		0.397					T	10
399	-116.565	0.313	304	2	133			0.313	2.70529	1.26837	T	T	10
400	126.87	1.294	305	2	134	1.294						M	10
401	21.801	0.742	305	2	134		0.742					M	10
402	-135	0.285	305	2	134			0.285	1.74394	2.60351	M	M	10
403	180	0.91	306	2	135	0.91						M	10
404	-90	0.537	306	2	135		0.537					M	10
405	-90	0.28	306	2	135			0.28	1.6946	1.91786	M	M	10
406	146.31	1.101	307	2	136	1.101						T	10
407	33.69	0.495	307	2	136		0.495					T	10
408	-135	0.383	307	2	136			0.383	2.22424	1.29243	T	T	10
409	-63.435	0.667	308	2	137	0.667						S	10
410	-116.565	0.24	308	2	137		0.24					S	10
411	180	0.281	308	2	137			0.281	2.77917	0.854093	S	S	10
412	-20.556	1.122	309	2	138	1.122						M	10
413	53.13	0.744	309	2	138		0.744					M	10
414	-108.435	0.369	309	2	138			0.369	1.50806	2.01626	M	M	10
415	-18.435	1.749	310	2	139	1.749						M	10
416	-123.69	0.46	310	2	139		0.46					M	10
417	-116.565	0.24	310	2	139			0.24	3.80217	1.91667	M	M	10
418	-33.69	1.417	311	2	140	1.417						T	10
419	-135	0.38	311	2	140		0.38					T	10
420	-135	0.38	311	2	140			0.38	3.72895	1	T	T	10
421	141.34	0.942	312	2	141	0.942						S	10
422	-135	0.446	312	2	141		0.446					S	10
423	-135	0.317	312	2	141			0.317	2.11211	1.40694	S	S	10
424	161.565	1.366	313	2	142	1.366						T	10
425	-108.435	0.421	313	2	142		0.421					T	10
426	-90	0.311	313	2	142			0.311	3.24466	1.3537	T	T	10
427	45	0.578	314	2	143	0.578						S	10
428	-56.31	0.413	314	2	143		0.413					S	10
429	-63.435	0.317	314	2	143			0.317	1.39952	1.30284	S	S	10
430	111.801	0.79	315	2	144	0.79						S	10
431	-146.31	0.46	315	2	144		0.46					S	10
432	0	0.28	315	2	144			0.28	1.71739	1.64286	S	S	10
433	-116.565	0.877	316	2	145	0.877						S	10
434	0	0.257	316	2	145		0.257					S	10
435	0	0.35	316	2	145			0.35	3.41245	0.734286	S	S	10
436	125.538	1.191	317	2	146	1.191						T	10
437	45	0.518	317	2	146		0.518					T	10
438	180	0.374	317	2	146			0.374	2.29923	1.38503	T	T	10
439	180	1.121	318	2	147	1.121						T	10
440	-90	0.257	318	2	147		0.257					T	10
441	-63.435	0.266	318	2	147			0.266	4.36187	0.966165	T	T	10
442	30.964	0.803	319	2	148	0.803						M	10
443	-63.435	0.616	319	2	148		0.616					M	10
444	-63.435	0.292	319	2	148			0.292	1.30357	2.10959	M	M	10
445	-175.236	1.682	320	2	149	1.682						T	10
446	-90	0.561	320	2	149		0.561					T	10
447	-63.435	0.415	320	2	149			0.415	2.99822	1.35181	T	T	10
448	-123.69	1.042	321	2	150	1.042						T	10
449	-45	0.397	321	2	150		0.397					T	10
450	0	0.373	321	2	150			0.373	2.62469	1.06434	T	T	10
451	-141.34	0.828	322	2	151	0.828						S	10
452	-26.565	0.363	322	2	151		0.363					S	10
453	-56.31	0.408	322	2	151			0.408	2.28099	0.889706	S	S	10
454	35.538	1.314	323	2	152	1.314						M	10
455	-45	0.809	323	2	152		0.809					M	10
456	-26.565	0.38	323	2	152			0.38	1.62423	2.12895	M	M	10
457	45	0.611	324	2	153	0.611						S	10
458	-45	0.35	324	2	153		0.35					S	10
459	153.435	0.272	324	2	153			0.272	1.74571	1.28676	S	S	10
460	-59.036	0.913	325	2	154	0.913						S	10
461	-123.69	0.602	325	2	154		0.602					S	10
462	180	0.56	325	2	154			0.56	1.51661	1.075	S	S	10
463	-66.801	1.045	326	2	155	1.045						M	10
464	36.87	0.583	326	2	155		0.583					M	10
465	0	0.215	326	2	155			0.215	1.79245	2.71163	M	M	10
466	-153.435	0.678	327	2	156	0.678						S	10
467	-56.31	0.514	327	2	156		0.514					S	10
468	-63.435	0.313	327	2	156			0.313	1.31907	1.64217	S	S	10
469	-90	0.66	328	2	157	0.66						S	10
470	0	0.467	328	2	157		0.467					S	10
471	180	0.467	328	2	157			0.467	1.41328	1	S	S	10
472	-108.435	0.827	329	2	158	0.827						M	10
473	153.435	0.347	329	2	158		0.347					M	10
474	0	0.14	329	2	158			0.14	2.38329	2.47857	M	M	10
475	-50.194	0.977	330	2	159	0.977						S	10
476	26.565	0.602	330	2	159		0.602					S	10
477	180	0.362	330	2	159			0.362	1.62292	1.66298	S	S	10
478	81.87	0.883	331	2	160	0.883						S	10
479	161.565	0.38	331	2	160		0.38					S	10
480	180	0.304	331	2	160			0.304	2.32368	1.25	S	S	10
481	82.875	1.136	332	2	161	1.136						T	10
482	146.31	0.408	332	2	161		0.408					T	10
483	180	0.35	332	2	161			0.35	2.78431	1.16571	T	T	10
484	-68.199	0.768	333	2	162	0.768						S	10
485	-153.435	0.347	333	2	162		0.347					S	10
486	180	0.28	333	2	162			0.28	2.21326	1.23929	S	S	10
487	-50.711	1.957	334	2	163	1.957						T	10
488	180	0.426	334	2	163		0.426					T	10
489	18.435	0.334	334	2	163			0.334	4.5939	1.27545	T	T	10
490	63.435	0.918	335	2	164	0.918						M	10
491	-18.435	0.894	335	2	164		0.894					M	10
492	-18.435	0.472	335	2	164			0.472	1.02685	1.89407	M	M	10
493	-126.87	0.738	336	2	165	0.738						S	10
494	-33.69	0.446	336	2	165		0.446					S	10
495	0	0.472	336	2	165			0.472	1.65471	0.944915	S	S	10
496	-116.565	0.608	337	2	166	0.608						M	10
497	161.565	0.451	337	2	166		0.451					M	10
498	180	0.258	337	2	166			0.258	1.34812	1.74806	M	M	10
499	158.199	0.776	338	2	167	0.776						S	10
500	45	0.401	338	2	167		0.401					S	10
501	-153.435	0.365	338	2	167			0.365	1.93516	1.09863	S	S	10
502	-45	0.792	339	2	168	0.792						S	10
503	-123.69	0.462	339	2	168		0.462					S	10
504	26.565	0.299	339	2	168			0.299	1.71429	1.54515	S	S	10
505	165.964	1.115	340	2	169	1.115						M	10
506	71.565	0.421	340	2	169		0.421					M	10
507	90	0.246	340	2	169			0.246	2.64846	1.71138	M	M	10
508	14.036	1.217	341	2	170	1.217						M	10
509	-78.69	0.635	341	2	170		0.635					M	10
510	-63.435	0.34	341	2	170			0.34	1.91654	1.86765	M	M	10
511	51.34	0.843	342	2	171	0.843						M	10
512	-45	0.512	342	2	171		0.512					M	10
513	-63.435	0.292	342	2	171			0.292	1.64648	1.75342	M	M	10
514	-30.964	1.577	343	2	172	1.577						T	10
515	-135	0.415	343	2	172		0.415					T	10
516	-116.565	0.248	343	2	172			0.248	3.8	1.67339	T	T	10
517	174.289	1.407	344	2	173	1.407						T	10
518	-90	0.403	344	2	173		0.403					T	10
519	-90	0.258	344	2	173			0.258	3.49132	1.56202	T	T	10
520	-123.69	0.621	345	2	174	0.621						S	10
521	146.31	0.376	345	2	174		0.376					S	10
522	-26.565	0.324	345	2	174			0.324	1.6516	1.16049	S	S	10
523	-135	0.528	346	2	175	0.528						S	10
524	-45	0.396	346	2	175		0.396					S	10
525	-45	0.285	346	2	175			0.285	1.33333	1.38947	S	S	10
526	-75.964	0.577	347	2	176	0.577						S	10
527	-153.435	0.272	347	2	176		0.272					S	10
528	45	0.221	347	2	176			0.221	2.12132	1.23077	S	S	10
529	-168.69	0.76	348	2	177	0.76						S	10
530	-90	0.357	348	2	177		0.357					S	10
531	90	0.273	348	2	177			0.273	2.12885	1.30769	S	S	10
532	-33.69	1.029	349	2	178	1.029						T	10
533	-108.435	0.413	349	2	178		0.413					T	10
534	26.565	0.303	349	2	178			0.303	2.49153	1.36304	T	T	10
535	90	0.7	350	2	179	0.7						S	10
536	135	0.285	350	2	179		0.285					S	10
537	180	0.328	350	2	179			0.328	2.45614	0.868902	S	S	10
538	-29.745	1.107	351	2	180	1.107						T	10
539	-135	0.481	351	2	180		0.481					T	10
540	-90	0.376	351	2	180			0.376	2.30146	1.27926	T	T	10
541	153.435	1.472	352	2	181	1.472						M	10
542	-104.036	0.6	352	2	181		0.6					M	10
543	-153.435	0.299	352	2	181			0.299	2.45333	2.00669	M	M	10
544	-51.34	0.882	353	2	182	0.882						S	10
545	39.806	1.05	353	2	182		1.05					S	10
546	-135	0.66	353	2	182			0.66	0.84	1.59091	S	S	10
547	-45	1.37	354	2	183	1.37						T	10
548	45	0.562	354	2	183		0.562					T	10
549	14.036	0.585	354	2	183			0.585	2.43772	0.960684	T	T	10
550	128.66	0.841	355	2	184	0.841						S	10
551	33.69	0.448	355	2	184		0.448					S	10
552	0	0.374	355	2	184			0.374	1.87723	1.19786	S	S	10
553	-146.31	1.031	356	2	185	1.031						T	10
554	-45	0.496	356	2	185		0.496					T	10
555	-18.435	0.357	356	2	185			0.357	2.07863	1.38936	T	T	10
556	-146.31	0.462	357	2	186	0.462						S	10
557	-26.565	0.388	357	2	186		0.388					S	10
558	-26.565	0.317	357	2	186			0.317	1.19072	1.22397	S	S	10
559	100.305	1.479	358	2	187	1.479						M	10
560	11.31	0.742	358	2	187		0.742					M	10
561	0	0.281	358	2	187			0.281	1.99326	2.64057	M	M	10
562	-83.66	1.178	359	2	188	1.178						M	10
563	45	0.481	359	2	188		0.481					M	10
564	0	0.257	359	2	188			0.257	2.44906	1.8716	M	M	10
565	135	0.747	360	2	189	0.747						M	10
566	-135	0.628	360	2	189		0.628					M	10
567	26.565	0.273	360	2	189			0.273	1.18949	2.30037	M	M	10
568	-116.565	0.654	361	2	190	0.654						S	10
569	146.31	0.421	361	2	190		0.421					S	10
570	-26.565	0.313	361	2	190			0.313	1.55344	1.34505	S	S	10
571	-45	0.843	362	2	191	0.843						S	10
572	-116.565	0.383	362	2	191		0.383					S	10
573	18.435	0.408	362	2	191			0.408	2.20104	0.938725	S	S	10
574	56.31	1.017	363	2	192	1.017						T	10
575	-45	0.545	363	2	192		0.545					T	10
576	165.964	0.487	363	2	192			0.487	1.86606	1.1191	T	T	10
577	111.801	0.724	364	2	193	0.724						M	10
578	-165.964	0.524	364	2	193		0.524					M	10
579	0	0.257	364	2	193			0.257	1.38168	2.03891	M	M	10
580	143.13	0.677	365	2	194	0.677						S	10
581	-135	0.347	365	2	194		0.347					S	10
582	-116.565	0.231	365	2	194			0.231	1.95101	1.50216	S	S	10
583	-56.31	0.544	366	2	195	0.544						M	10
584	-153.435	0.332	366	2	195		0.332					M	10
585	45	0.188	366	2	195			0.188	1.63855	1.76596	M	M	10
586	-120.964	0.836	367	2	196	0.836						S	10
587	-63.435	0.281	367	2	196		0.281					S	10
588	26.565	0.304	367	2	196			0.304	2.97509	0.924342	S	S	10
589	-38.66	0.765	368	2	197	0.765						M	10
590	-126.87	0.63	368	2	197		0.63					M	10
591	26.565	0.364	368	2	197			0.364	1.21429	1.73077	M	M	10
592	168.69	0.642	369	2	198	0.642						S	10
593	-116.565	0.317	369	2	198		0.317					S	10
594	-135	0.272	369	2	198			0.272	2.02524	1.16544	S	S	10
595	171.87	0.925	370	2	199	0.925						M	10
596	-108.435	0.421	370	2	199		0.421					M	10
597	-116.565	0.244	370	2	199			0.244	2.19715	1.72541	M	M	10
598	-63.435	0.689	371	2	200	0.689						M	10
599	-153.435	0.356	371	2	200		0.356					M	10
600	-135	0.209	371	2	200			0.209	1.93539	1.70335	M	M	10
601	0	0.491	372	2	201	0.491						S	10
602	-90	0.251	372	2	201		0.251					S	10
603	-90	0.273	372	2	201			0.273	1.95618	0.919414	S	S	10
604	-94.086	1.94	373	2	202	1.94						T	10
605	-153.435	0.347	373	2	202		0.347					T	10
606	0	0.351	373	2	202			0.351	5.59078	0.988604	T	T	10
607	98.13	0.984	374	2	203	0.984						M	10
608	0	0.513	374	2	203		0.513					M	10
609	0	0.261	374	2	203			0.261	1.91813	1.96552	M	M	10
610	-49.399	1.32	375	2	204	1.32						M	10
611	56.31	0.57	375	2	204		0.57					M	10
612	45	0.281	375	2	204			0.281	2.31579	2.02847	M	M	10
613	-4.764	1.688	376	2	205	1.688						T	10
614	161.565	0.385	376	2	205		0.385					T	10
615	-153.435	0.317	376	2	205			0.317	4.38442	1.21451	T	T	10
616	-26.565	0.551	377	2	206	0.551						S	10
617	45	0.363	377	2	206		0.363					S	10
618	-116.565	0.299	377	2	206			0.299	1.51791	1.21405	S	S	10
619	-99.462	0.856	378	2	207	0.856						S	10
620	0	0.303	378	2	207		0.303					S	10
621	0	0.362	378	2	207			0.362	2.82508	0.837017	S	S	10
622	146.31	0.537	379	2	208	0.537						S	10
623	-135	0.448	379	2	208		0.448					S	10
624	-135	0.495	379	2	208			0.495	1.19866	0.905051	S	S	10
625	153.435	0.993	380	2	209	0.993						S	10
626	-146.31	0.481	380	2	209		0.481					S	10
627	-135	0.33	380	2	209			0.33	2.06445	1.45758	S	S	10
628	106.699	1.381	381	2	210	1.381						T	10
629	180	0.408	381	2	210		0.408					T	10
630	-161.565	0.449	381	2	210			0.449	3.3848	0.908686	T	T	10
631	-53.13	1.385	382	2	211	1.385						T	10
632	-146.31	0.512	382	2	211		0.512					T	10
633	-135	0.43	382	2	211			0.43	2.70508	1.1907	T	T	10
634	-45	1.008	383	2	212	1.008						T	10
635	-135	0.545	383	2	212		0.545					T	10
636	180	0.362	383	2	212			0.362	1.84954	1.50552	T	T	10
637	56.31	1.017	384	2	213	1.017						M	10
638	-45	0.645	384	2	213		0.645					M	10
639	180	0.374	384	2	213			0.374	1.57674	1.7246	M	M	10
640	53.13	0.693	385	2	214	0.693						M	10
641	-56.31	0.446	385	2	214		0.446					M	10
642	-26.565	0.261	385	2	214			0.261	1.55381	1.70881	M	M	10
643	-101.31	0.654	386	2	215	0.654						S	10
644	0	0.351	386	2	215		0.351					S	10
645	0	0.373	386	2	215			0.373	1.86325	0.941019	S	S	10
646	71.565	0.915	387	2	216	0.915						S	10
647	-18.435	0.472	387	2	216		0.472					S	10
648	161.565	0.376	387	2	216			0.376	1.93856	1.25532	S	S	10
649	-49.399	1.324	388	2	217	1.324						T	10
650	-153.435	0.332	388	2	217		0.332					T	10
651	-153.435	0.314	388	2	217			0.314	3.98795	1.05732	T	T	10
652	116.565	1.263	389	2	218	1.263						T	10
653	-146.31	0.518	389	2	218		0.518					T	10
654	-161.565	0.377	389	2	218			0.377	2.43822	1.37401	T	T	10
655	129.806	1.093	390	2	219	1.093						T	10
656	26.565	0.314	390	2	219		0.314					T	10
657	-135	0.314	390	2	219			0.314	3.48089	1	T	T	10
658	146.31	0.518	391	2	220	0.518						S	10
659	-135	0.24	391	2	220		0.24					S	10
660	-153.435	0.383	391	2	220			0.383	2.15833	0.626632	S	S	10
661	-71.565	0.834	392	2	221	0.834						S	10
662	-170.538	0.812	392	2	221		0.812					S	10
663	-161.565	0.481	392	2	221			0.481	1.02709	1.68815	S	S	10
664	-63.435	0.481	393	2	222	0.481						S	10
665	33.69	0.408	393	2	222		0.408					S	10
666	-153.435	0.273	393	2	222			0.273	1.17892	1.49451	S	S	10
667	99.462	0.81	394	2	223	0.81						S	10
668	180	0.295	394	2	223		0.295					S	10
669	-153.435	0.317	394	2	223			0.317	2.74576	0.930599	S	S	10
670	-90	0.608	395	2	224	0.608						S	10
671	180	0.397	395	2	224		0.397					S	10
672	180	0.257	395	2	224			0.257	1.53149	1.54475	S	S	10
673	-33.69	0.505	396	2	225	0.505						S	10
674	-135	0.842	396	2	225		0.842					S	10
675	-126.87	0.694	396	2	225			0.694	0.599762	1.21326	S	S	10
676	129.806	1.024	397	2	226	1.024						T	10
677	-135	0.383	397	2	226		0.383					T	10
678	-116.565	0.337	397	2	226			0.337	2.67363	1.1365	T	T	10
679	116.565	0.711	398	2	227	0.711						M	10
680	14.036	0.6	398	2	227		0.6					M	10
681	180	0.334	398	2	227			0.334	1.185	1.79641	M	M	10
682	-113.199	1.014	399	2	228	1.014						T	10
683	-18.435	0.518	399	2	228		0.518					T	10
684	0	0.35	399	2	228			0.35	1.95753	1.48	T	T	10
685	-30.964	0.889	400	2	229	0.889						M	10
686	-123.69	0.583	400	2	229		0.583					M	10
687	-116.565	0.317	400	2	229			0.317	1.52487	1.83912	M	M	10
688	-90	1.028	401	2	230	1.028						M	10
689	0	0.49	401	2	230		0.49					M	10
690	0	0.258	401	2	230			0.258	2.09796	1.89922	M	M	10
691	0	0.611	402	2	231	0.611						S	10
692	-108.435	0.436	402	2	231		0.436					S	10
693	-90	0.357	402	2	231			0.357	1.40138	1.22129	S	S	10
694	158.199	0.753	403	2	232	0.753						S	10
695	-135	0.314	403	2	232		0.314					S	10
696	-116.565	0.311	403	2	232			0.311	2.39809	1.00965	S	S	10
697	-45	1.289	404	2	233	1.289						T	10
698	-135	0.215	404	2	233		0.215					T	10
699	-153.435	0.266	404	2	233			0.266	5.99535	0.808271	T	T	10
700	153.435	0.693	405	2	234	0.693						S	10
701	-116.565	0.313	405	2	234		0.313					S	10
702	-161.565	0.391	405	2	234			0.391	2.21406	0.800512	S	S	10
703	146.31	0.971	406	2	235	0.971						S	10
704	45	0.285	406	2	235		0.285					S	10
705	-135	0.332	406	2	235			0.332	3.40702	0.858434	S	S	10
706	135	0.499	407	2	236	0.499						S	10
707	-135	0.369	407	2	236		0.369					S	10
708	-135	0.317	407	2	236			0.317	1.3523	1.16404	S	S	10
709	-30.964	0.861	408	2	237	0.861						S	10
710	-135	0.448	408	2	237		0.448					S	10
711	-123.69	0.446	408	2	237			0.446	1.92188	1.00448	S	S	10
712	-32.005	1.33	409	2	238	1.33						T	10
713	-108.435	0.44	409	2	238		0.44					T	10
714	-123.69	0.43	409	2	238			0.43	3.02273	1.02326	T	T	10
715	-11.31	0.677	410	2	239	0.677						S	10
716	-90	0.397	410	2	239		0.397					S	10
717	-90	0.472	410	2	239			0.472	1.70529	0.841102	S	S	10
718	-53.13	0.628	411	2	240	0.628						S	10
719	-153.435	0.248	411	2	240		0.248					S	10
720	-153.435	0.295	411	2	240			0.295	2.53226	0.840678	S	S	10
721	14.036	0.562	412	2	241	0.562						M	10
722	-59.036	0.846	412	2	241		0.846					M	10
723	-63.435	0.313	412	2	241			0.313	0.664303	2.70288	M	M	10
724	6.34	1.324	413	2	242	1.324						M	10
725	-90	0.537	413	2	242		0.537					M	10
726	-63.435	0.273	413	2	242			0.273	2.46555	1.96703	M	M	10
727	168.69	0.829	414	2	243	0.829						S	10
728	-108.435	0.449	414	2	243		0.449					S	10
729	-116.565	0.307	414	2	243			0.307	1.84633	1.46254	S	S	10
730	-26.565	0.628	415	2	244	0.628						S	10
731	-135	0.38	415	2	244		0.38					S	10
732	-135	0.35	415	2	244			0.35	1.65263	1.08571	S	S	10
733	158.199	0.814	416	2	245	0.814						S	10
734	-116.565	0.317	416	2	245		0.317					S	10
735	-90	0.303	416	2	245			0.303	2.56782	1.0462	S	S	10
736	-45	0.76	417	2	246	0.76						S	10
737	-135	0.529	417	2	246		0.529					S	10
738	-135	0.383	417	2	246			0.383	1.43667	1.3812	S	S	10
739	-23.199	1.066	418	2	247	1.066						T	10
740	-116.565	0.491	418	2	247		0.491					T	10
741	-90	0.328	418	2	247			0.328	2.17108	1.49695	T	T	10
742	149.036	0.817	419	2	248	0.817						S	10
743	45	0.43	419	2	248		0.43					S	10
744	-116.565	0.289	419	2	248			0.289	1.9	1.48789	S	S	10
745	147.995	1.411	420	2	249	1.411						T	10
746	-116.565	0.35	420	2	249		0.35					T	10
747	-90	0.385	420	2	249			0.385	4.03143	0.909091	T	T	10
748	-143.13	0.682	421	2	250	0.682						S	10
749	-53.13	0.583	421	2	250		0.583					S	10
750	-75.964	0.491	421	2	250			0.491	1.16981	1.18737	S	S	10
751	126.87	0.714	422	2	251	0.714						S	10
752	-161.565	0.376	422	2	251		0.376					S	10
753	-153.435	0.317	422	2	251			0.317	1.89894	1.18612	S	S	10
754	-26.565	1.514	423	2	252	1.514						M	10
755	-90	0.677	423	2	252		0.677					M	10
756	26.565	0.313	423	2	252			0.313	2.23634	2.16294	M	M	10
757	-39.806	1.107	424	2	253	1.107						M	10
758	-143.13	0.729	424	2	253		0.729					M	10
759	-153.435	0.334	424	2	253			0.334	1.51852	2.18263	M	M	10
760	30.964	0.887	425	2	254	0.887						S	10
761	-56.31	0.448	425	2	254		0.448					S	10
762	-71.565	0.436	425	2	254			0.436	1.97991	1.02752	S	S	10
763	-45	1.601	426	2	255	1.601						M	10
764	-123.69	0.415	426	2	255		0.415					M	10
765	0	0.188	426	2	255			0.188	3.85783	2.20745	M	M	10
766	-15.945	0.989	427	2	256	0.989						S	10
767	-90	0.423	427	2	256		0.423					S	10
768	-116.565	0.258	427	2	256			0.258	2.33806	1.63953	S	S	10
769	156.801	0.991	428	2	257	0.991						S	10
770	-116.565	0.637	428	2	257		0.637					S	10
771	-123.69	0.491	428	2	257			0.491	1.55573	1.29735	S	S	10
772	35.538	1.173	429	2	258	1.173						T	10
773	-45	0.649	429	2	258		0.649					T	10
774	-71.565	0.436	429	2	258			0.436	1.8074	1.48853	T	T	10
775	-71.565	0.481	430	2	259	0.481						S	10
776	-146.31	0.449	430	2	259		0.449					S	10
777	180	0.289	430	2	259			0.289	1.07127	1.55363	S	S	10
778	180	0.564	431	2	260	0.564						S	10
779	-116.565	0.289	431	2	260		0.289					S	10
780	-90	0.33	431	2	260			0.33	1.95156	0.875758	S	S	10
781	-161.565	0.595	432	2	261	0.595						S	10
782	-90	0.353	432	2	261		0.353					S	10
783	-63.435	0.325	432	2	261			0.325	1.68555	1.08615	S	S	10
784	-143.13	0.686	433	2	262	0.686						S	10
785	-56.31	0.585	433	2	262		0.585					S	10
786	-45	0.408	433	2	262			0.408	1.17265	1.43382	S	S	10
787	-33.69	0.952	434	2	263	0.952						M	10
788	59.036	0.825	434	2	263		0.825					M	10
789	-135	0.421	434	2	263			0.421	1.15394	1.95962	M	M	10
790	170.538	0.929	435	2	264	0.929						S	10
791	-135	0.347	435	2	264		0.347					S	10
792	-90	0.353	435	2	264			0.353	2.67723	0.983003	S	S	10
1	-78.69	0.743	436	3	1	0.743						S	10
2	0	0.454	436	3	1		0.454					S	10
3	180	0.284	436	3	1			0.284	1.63656	1.59859	S	S	10
4	135	0.579	437	3	2	0.579						S	10
5	-135	0.222	437	3	2		0.222					S	10
6	-153.435	0.273	437	3	2			0.273	2.60811	0.813187	S	S	10
7	51.34	0.928	438	3	3	0.928						S	10
8	-63.435	0.335	438	3	3		0.335					S	10
9	0	0.21	438	3	3			0.21	2.77015	1.59524	S	S	10
10	-45	0.646	439	3	4	0.646						S	10
11	-116.565	0.299	439	3	4		0.299					S	10
12	-135	0.201	439	3	4			0.201	2.16054	1.48756	S	S	10
13	-116.565	0.577	440	3	5	0.577						S	10
14	-18.435	0.51	440	3	5		0.51					S	10
15	0	0.335	440	3	5			0.335	1.13137	1.52239	S	S	10
16	135	0.781	441	3	6	0.781						S	10
17	-116.565	0.299	441	3	6		0.299					S	10
18	-135	0.297	441	3	6			0.297	2.61204	1.00673	S	S	10
19	161.565	0.859	442	3	7	0.859						S	10
20	-90	0.312	442	3	7		0.312					S	10
21	-116.565	0.282	442	3	7			0.282	2.75321	1.10638	S	S	10
22	-36.87	0.739	443	3	8	0.739						S	10
23	-135	0.369	443	3	8		0.369					S	10
24	-135	0.281	443	3	8			0.281	2.00271	1.31317	S	S	10
25	-78.69	0.73	444	3	9	0.73						S	10
26	-18.435	0.408	444	3	9		0.408					S	10
27	180	0.282	444	3	9			0.282	1.78922	1.44681	S	S	10
28	-33.69	0.523	445	3	10	0.523						S	10
29	-116.565	0.378	445	3	10		0.378					S	10
30	-90	0.274	445	3	10			0.274	1.3836	1.37956	S	S	10
31	153.435	1.254	446	3	11	1.254						T	10
32	-153.435	0.282	446	3	11		0.282					T	10
33	-123.69	0.545	446	3	11			0.545	4.44681	0.517431	T	T	10
34	0	0.586	447	3	12	0.586						S	10
35	-56.31	0.409	447	3	12		0.409					S	10
36	-90	0.258	447	3	12			0.258	1.43276	1.58527	S	S	10
37	-40.601	1.339	448	3	13	1.339						M	10
38	45	0.563	448	3	13		0.563					M	10
39	-135	0.248	448	3	13			0.248	2.37833	2.27016	M	M	10
40	180	0.777	449	3	14	0.777						S	10
41	-90	0.403	449	3	14		0.403					S	10
42	-90	0.28	449	3	14			0.28	1.92804	1.43929	S	S	10
43	-156.038	1.275	450	3	15	1.275						M	10
44	-45	0.584	450	3	15		0.584					M	10
45	-90	0.258	450	3	15			0.258	2.18322	2.26357	M	M	10
46	135	1.787	451	3	16	1.787						T	10
47	-123.69	0.519	451	3	16		0.519					T	10
48	63.435	0.332	451	3	16			0.332	3.44316	1.56325	T	T	10
49	-26.565	1.006	452	3	17	1.006						T	10
50	-108.435	0.504	452	3	17		0.504					T	10
51	-116.565	0.305	452	3	17			0.305	1.99603	1.65246	T	T	10
52	149.036	0.798	453	3	18	0.798						S	10
53	-116.565	0.325	453	3	18		0.325					S	10
54	-116.565	0.253	453	3	18			0.253	2.45538	1.28458	S	S	10
55	-14.036	0.669	454	3	19	0.669						M	10
56	-120.964	0.746	454	3	19		0.746					M	10
57	-116.565	0.366	454	3	19			0.366	0.896783	2.03825	M	M	10
58	161.565	0.924	455	3	20	0.924						S	10
59	-108.435	0.451	455	3	20		0.451					S	10
60	-135	0.299	455	3	20			0.299	2.04878	1.50836	S	S	10
61	-45	0.646	456	3	21	0.646						S	10
62	-135	0.413	456	3	21		0.413					S	10
63	-153.435	0.299	456	3	21			0.299	1.56416	1.38127	S	S	10
64	149.036	0.81	457	3	22	0.81						M	10
65	-116.565	0.586	457	3	22		0.586					M	10
66	-116.565	0.285	457	3	22			0.285	1.38225	2.05614	M	M	10
67	139.399	1.306	458	3	23	1.306						M	10
68	-123.69	0.473	458	3	23		0.473					M	10
69	-153.435	0.274	458	3	23			0.274	2.7611	1.72628	M	M	10
70	-71.565	0.441	459	3	24	0.441						S	10
71	45	0.609	459	3	24		0.609					S	10
72	-146.31	0.486	459	3	24			0.486	0.724138	1.25309	S	S	10
73	150.255	1.067	460	3	25	1.067						M	10
74	-116.565	0.365	460	3	25		0.365					M	10
75	-90	0.193	460	3	25			0.193	2.92329	1.89119	M	M	10
76	135	0.893	461	3	26	0.893						M	10
77	-135	0.38	461	3	26		0.38					M	10
78	-116.565	0.215	461	3	26			0.215	2.35	1.76744	M	M	10
79	-71.565	0.402	462	3	27	0.402						S	10
80	45	0.446	462	3	27		0.446					S	10
81	-135	0.285	462	3	27			0.285	0.901345	1.56491	S	S	10
82	-45	0.58	463	3	28	0.58						M	10
83	-146.31	0.5	463	3	28		0.5					M	10
84	-135	0.234	463	3	28			0.234	1.16	2.13675	M	M	10
85	-90	1.195	464	3	29	1.195						M	10
86	-165.964	0.496	464	3	29		0.496					M	10
87	-153.435	0.282	464	3	29			0.282	2.40927	1.75887	M	M	10
88	156.038	1.296	465	3	30	1.296						T	10
89	-116.565	0.332	465	3	30		0.332					T	10
90	-153.435	0.285	465	3	30			0.285	3.90361	1.16491	T	T	10
91	131.186	1.438	466	3	31	1.438						T	10
92	45	0.631	466	3	31		0.631					T	10
93	180	0.516	466	3	31			0.516	2.27892	1.22287	T	T	10
94	-63.435	0.951	467	3	32	0.951						S	10
95	-153.435	0.369	467	3	32		0.369					S	10
96	-153.435	0.304	467	3	32			0.304	2.57724	1.21382	S	S	10
97	-141.34	0.851	468	3	33	0.851						M	10
98	-45	0.38	468	3	33		0.38					M	10
99	-90	0.215	468	3	33			0.215	2.23947	1.76744	M	M	10
100	-39.806	1.047	469	3	34	1.047						M	10
101	-123.69	0.449	469	3	34		0.449					M	10
102	26.565	0.264	469	3	34			0.264	2.33185	1.70076	M	M	10
103	180	0.661	470	3	35	0.661						M	10
104	-104.036	0.562	470	3	35		0.562					M	10
105	90	0.235	470	3	35			0.235	1.17616	2.39149	M	M	10
106	-45	0.579	471	3	36	0.579						M	10
107	33.69	0.497	471	3	36		0.497					M	10
108	-135	0.215	471	3	36			0.215	1.16499	2.31163	M	M	10
109	104.036	0.681	472	3	37	0.681						S	10
110	180	0.608	472	3	37		0.608					S	10
111	180	0.444	472	3	37			0.444	1.12007	1.36937	S	S	10
112	-36.87	0.668	473	3	38	0.668						S	10
113	-135	0.579	473	3	38		0.579					S	10
114	-161.565	0.461	473	3	38			0.461	1.15371	1.25597	S	S	10
115	126.87	0.617	474	3	39	0.617						S	10
116	-135	0.454	474	3	39		0.454					S	10
117	-161.565	0.378	474	3	39			0.378	1.35903	1.20106	S	S	10
118	102.529	1.256	475	3	40	1.256						M	10
119	180	0.5	475	3	40		0.5					M	10
120	0	0.257	475	3	40			0.257	2.512	1.94553	M	M	10
121	90	0.983	476	3	41	0.983						M	10
122	180	0.584	476	3	41		0.584					M	10
123	-26.565	0.314	476	3	41			0.314	1.68322	1.85987	M	M	10
124	-56.31	0.493	477	3	42	0.493						S	10
125	-135	0.33	477	3	42		0.33					S	10
126	-135	0.325	477	3	42			0.325	1.49394	1.01538	S	S	10
127	-45	0.566	478	3	43	0.566						S	10
128	45	0.33	478	3	43		0.33					S	10
129	180	0.215	478	3	43			0.215	1.71515	1.53488	S	S	10
130	-98.13	0.992	479	3	44	0.992						M	10
131	-45	0.546	479	3	44		0.546					M	10
132	180	0.234	479	3	44			0.234	1.81685	2.33333	M	M	10
133	-135	0.761	480	3	45	0.761						S	10
134	-63.435	0.325	480	3	45		0.325					S	10
135	-18.435	0.402	480	3	45			0.402	2.34154	0.808458	S	S	10
136	116.565	0.875	481	3	46	0.875						S	10
137	-135	0.596	481	3	46		0.596					S	10
138	0	0.377	481	3	46			0.377	1.46812	1.5809	S	S	10
139	-38.66	0.91	482	3	47	0.91						S	10
140	-116.565	0.325	482	3	47		0.325					S	10
141	26.565	0.244	482	3	47			0.244	2.8	1.33197	S	S	10
142	-59.036	0.754	483	3	48	0.754						S	10
143	-135	0.515	483	3	48		0.515					S	10
144	-146.31	0.473	483	3	48			0.473	1.46408	1.08879	S	S	10
145	-116.565	0.629	484	3	49	0.629						M	10
146	-33.69	0.416	484	3	49		0.416					M	10
147	180	0.215	484	3	49			0.215	1.51202	1.93488	M	M	10
148	-36.87	0.631	485	3	50	0.631						M	10
149	51.34	0.827	485	3	50		0.827					M	10
150	-161.565	0.429	485	3	50			0.429	0.762999	1.92774	M	M	10
151	135	1.141	486	3	51	1.141						M	10
152	-135	0.464	486	3	51		0.464					M	10
153	-135	0.252	486	3	51			0.252	2.45905	1.84127	M	M	10
154	-51.34	0.869	487	3	52	0.869						M	10
155	45	0.416	487	3	52		0.416					M	10
156	45	0.23	487	3	52			0.23	2.08894	1.8087	M	M	10
157	-164.055	1.064	488	3	53	1.064						M	10
158	-90	0.516	488	3	53		0.516					M	10
159	-26.565	0.293	488	3	53			0.293	2.06202	1.76109	M	M	10
160	-153.435	1.272	489	3	54	1.272						M	10
161	-75.964	0.642	489	3	54		0.642					M	10
162	-63.435	0.261	489	3	54			0.261	1.98131	2.45977	M	M	10
163	9.462	1.656	490	3	55	1.656						M	10
164	-82.875	1.058	490	3	55		1.058					M	10
165	-63.435	0.284	490	3	55			0.284	1.56522	3.72535	M	M	10
166	-110.556	1.102	491	3	56	1.102						M	10
167	-33.69	0.421	491	3	56		0.421					M	10
168	0	0.187	491	3	56			0.187	2.61758	2.25134	M	M	10
169	153.435	0.946	492	3	57	0.946						S	10
170	-108.435	0.443	492	3	57		0.443					S	10
171	-90	0.261	492	3	57			0.261	2.13544	1.69732	S	S	10
172	5.711	1.368	493	3	58	1.368						M	10
173	-75.964	0.588	493	3	58		0.588					M	10
174	-90	0.328	493	3	58			0.328	2.32653	1.79268	M	M	10
175	-164.055	0.961	494	3	59	0.961						S	10
176	-71.565	0.354	494	3	59		0.354					S	10
177	-63.435	0.252	494	3	59			0.252	2.71469	1.40476	S	S	10
178	158.199	0.784	495	3	60	0.784						S	10
179	36.87	0.711	495	3	60		0.711					S	10
180	-108.435	0.43	495	3	60			0.43	1.10267	1.65349	S	S	10
181	140.194	1.122	496	3	61	1.122						M	10
182	26.565	0.669	496	3	61		0.669					M	10
183	-153.435	0.281	496	3	61			0.281	1.67713	2.38078	M	M	10
184	170.538	0.819	497	3	62	0.819						S	10
185	90	0.398	497	3	62		0.398					S	10
186	-90	0.257	497	3	62			0.257	2.05779	1.54864	S	S	10
187	-45	0.781	498	3	63	0.781						M	10
188	56.31	0.538	498	3	63		0.538					M	10
189	-116.565	0.285	498	3	63			0.285	1.45167	1.88772	M	M	10
190	-20.556	1.264	499	3	64	1.264						M	10
191	56.31	0.597	499	3	64		0.597					M	10
192	-116.565	0.23	499	3	64			0.23	2.11725	2.59565	M	M	10
193	153.435	0.577	500	3	65	0.577						S	10
194	71.565	0.421	500	3	65		0.421					S	10
195	-116.565	0.273	500	3	65			0.273	1.37055	1.54212	S	S	10
196	5.194	1.542	501	3	66	1.542						T	10
197	71.565	0.473	501	3	66		0.473					T	10
198	-90	0.33	501	3	66			0.33	3.26004	1.43333	T	T	10
199	21.801	0.711	502	3	67	0.711						S	10
200	-71.565	0.43	502	3	67		0.43					S	10
201	-90	0.266	502	3	67			0.266	1.65349	1.61654	S	S	10
202	70.017	1.545	503	3	68	1.545						M	10
203	180	0.585	503	3	68		0.585					M	10
204	153.435	0.252	503	3	68			0.252	2.64103	2.32143	M	M	10
205	56.31	0.875	504	3	69	0.875						S	10
206	135	0.387	504	3	69		0.387					S	10
207	-26.565	0.345	504	3	69			0.345	2.26098	1.12174	S	S	10
208	-135	1.044	505	3	70	1.044						M	10
209	146.31	0.467	505	3	70		0.467					M	10
210	-45	0.193	505	3	70			0.193	2.23555	2.41969	M	M	10
211	-104.036	1.141	506	3	71	1.141						T	10
212	0	0.397	506	3	71		0.397					T	10
213	26.565	0.238	506	3	71			0.238	2.87406	1.66807	T	T	10
214	149.744	1.968	507	3	72	1.968						T	10
215	71.565	0.517	507	3	72		0.517					T	10
216	-153.435	0.33	507	3	72			0.33	3.80658	1.56667	T	T	10
217	108.435	0.881	508	3	73	0.881						S	10
218	33.69	0.513	508	3	73		0.513					S	10
219	-161.565	0.375	508	3	73			0.375	1.71735	1.368	S	S	10
220	71.565	0.847	509	3	74	0.847						S	10
221	-33.69	0.45	509	3	74		0.45					S	10
222	-26.565	0.377	509	3	74			0.377	1.88222	1.19363	S	S	10
223	-126.87	0.73	510	3	75	0.73						S	10
224	-26.565	0.584	510	3	75		0.584					S	10
225	-18.435	0.459	510	3	75			0.459	1.25	1.27233	S	S	10
226	-135	1.176	511	3	76	1.176						M	10
227	-59.036	0.796	511	3	76		0.796					M	10
228	-26.565	0.356	511	3	76			0.356	1.47739	2.23596	M	M	10
229	56.31	1.058	512	3	77	1.058						T	10
230	-33.69	0.481	512	3	77		0.481					T	10
231	-45	0.314	512	3	77			0.314	2.19958	1.53185	T	T	10
232	-161.565	0.902	513	3	78	0.902						S	10
233	-63.435	0.681	513	3	78		0.681					S	10
234	-71.565	0.421	513	3	78			0.421	1.32452	1.61758	S	S	10
235	108.435	1.294	514	3	79	1.294						M	10
236	180	0.546	514	3	79		0.546					M	10
237	45	0.248	514	3	79			0.248	2.36996	2.20161	M	M	10
238	63.435	1.277	515	3	80	1.277						T	10
239	-45	0.479	515	3	80		0.479					T	10
240	153.435	0.307	515	3	80			0.307	2.66597	1.56026	T	T	10
241	-143.13	0.697	516	3	81	0.697						S	10
242	-45	0.496	516	3	81		0.496					S	10
243	-71.565	0.402	516	3	81			0.402	1.40524	1.23383	S	S	10
244	33.69	0.998	517	3	82	0.998						S	10
245	-63.435	0.282	517	3	82		0.282					S	10
246	-63.435	0.266	517	3	82			0.266	3.53901	1.06015	S	S	10
247	63.435	0.922	518	3	83	0.922						M	10
248	143.13	0.59	518	3	83		0.59					M	10
249	-45	0.241	518	3	83			0.241	1.56271	2.44813	M	M	10
250	-149.036	0.83	519	3	84	0.83						M	10
251	-45	0.645	519	3	84		0.645					M	10
252	-63.435	0.314	519	3	84			0.314	1.28682	2.05414	M	M	10
253	68.199	0.813	520	3	85	0.813						M	10
254	153.435	0.545	520	3	85		0.545					M	10
255	180	0.307	520	3	85			0.307	1.49174	1.77524	M	M	10
256	-135	0.431	521	3	86	0.431						S	10
257	-26.565	0.261	521	3	86		0.261					S	10
258	135	0.169	521	3	86			0.169	1.65134	1.54438	S	S	10
259	53.13	0.662	522	3	87	0.662						M	10
260	-33.69	0.482	522	3	87		0.482					M	10
261	-45	0.215	522	3	87			0.215	1.37344	2.24186	M	M	10
262	-90	0.563	523	3	88	0.563						S	10
263	180	0.304	523	3	88		0.304					S	10
264	180	0.357	523	3	88			0.357	1.85197	0.851541	S	S	10
265	-116.565	0.273	524	3	89	0.273						M	10
266	-26.565	0.266	524	3	89		0.266					M	10
267	180	0.117	524	3	89			0.117	1.02632	2.2735	M	M	10
268	-164.055	1.018	525	3	90	1.018						M	10
269	-71.565	0.454	525	3	90		0.454					M	10
270	-90	0.193	525	3	90			0.193	2.24229	2.35233	M	M	10
271	-135	0.198	526	3	91	0.198						S	10
272	135	0.369	526	3	91		0.369					S	10
273	-26.565	0.297	526	3	91			0.297	0.536585	1.24242	S	S	10
274	-165.964	1.066	527	3	92	1.066						M	10
275	-75.964	0.565	527	3	92		0.565					M	10
276	-90	0.28	527	3	92			0.28	1.88673	2.01786	M	M	10
277	-170.538	0.922	528	3	93	0.922						S	10
278	-90	0.375	528	3	93		0.375					S	10
279	-116.565	0.222	528	3	93			0.222	2.45867	1.68919	S	S	10
280	168.69	1.403	529	3	94	1.403						M	10
281	-75.964	0.631	529	3	94		0.631					M	10
282	45	0.264	529	3	94			0.264	2.22345	2.39015	M	M	10
283	171.254	1.861	530	3	95	1.861						M	10
284	-146.31	0.538	530	3	95		0.538					M	10
285	-63.435	0.299	530	3	95			0.299	3.45911	1.79933	M	M	10
286	108.435	0.791	531	3	96	0.791						S	10
287	18.435	0.454	531	3	96		0.454					S	10
288	-153.435	0.296	531	3	96			0.296	1.74229	1.53378	S	S	10
289	120.964	0.765	532	3	97	0.765						S	10
290	21.801	0.784	532	3	97		0.784					S	10
291	-161.565	0.47	532	3	97			0.47	0.975765	1.66809	S	S	10
292	146.31	1.445	533	3	98	1.445						T	10
293	-146.31	0.545	533	3	98		0.545					T	10
294	-153.435	0.33	533	3	98			0.33	2.65138	1.65152	T	T	10
295	-71.565	0.843	534	3	99	0.843						M	10
296	14.036	0.573	534	3	99		0.573					M	10
297	180	0.235	534	3	99			0.235	1.4712	2.4383	M	M	10
298	0	0.774	535	3	100	0.774						M	10
299	90	0.537	535	3	100		0.537					M	10
300	-90	0.28	535	3	100			0.28	1.44134	1.91786	M	M	10
301	-82.875	1.123	536	3	101	1.123						T	10
302	0	0.444	536	3	101		0.444					T	10
303	-153.435	0.285	536	3	101			0.285	2.52928	1.55789	T	T	10
304	-140.194	1.062	537	3	102	1.062						M	10
305	120.964	0.767	537	3	102		0.767					M	10
306	-63.435	0.314	537	3	102			0.314	1.38462	2.44268	M	M	10
307	-135	0.58	538	3	103	0.58						S	10
308	-90	0.426	538	3	103		0.426					S	10
309	-63.435	0.289	538	3	103			0.289	1.3615	1.47405	S	S	10
310	116.565	0.312	539	3	104	0.312						S	10
311	-153.435	0.273	539	3	104		0.273					S	10
312	180	0.188	539	3	104			0.188	1.14286	1.45213	S	S	10
313	45	0.876	540	3	105	0.876						S	10
314	153.435	0.297	540	3	105		0.297					S	10
315	-90	0.284	540	3	105			0.284	2.94949	1.04577	S	S	10
316	102.095	2.013	541	3	106	2.013						T	10
317	180	0.328	541	3	106		0.328					T	10
318	0	0.193	541	3	106			0.193	6.1372	1.69948	T	T	10
319	116.565	0.642	542	3	107	0.642						S	10
320	-146.31	0.523	542	3	107		0.523					S	10
321	0	0.351	542	3	107			0.351	1.22753	1.49003	S	S	10
322	75.964	1.072	543	3	108	1.072						M	10
323	0	0.773	543	3	108		0.773					M	10
324	153.435	0.212	543	3	108			0.212	1.3868	3.64623	M	M	10
325	-144.462	1.225	544	3	109	1.225						M	10
326	-33.69	0.446	544	3	109		0.446					M	10
327	-26.565	0.248	544	3	109			0.248	2.74664	1.79839	M	M	10
328	-145.008	1.764	545	3	110	1.764						M	10
329	-45	0.796	545	3	110		0.796					M	10
330	-90	0.38	545	3	110			0.38	2.21608	2.09474	M	M	10
331	-123.69	0.486	546	3	111	0.486						S	10
332	-33.69	0.454	546	3	111		0.454					S	10
333	135	0.345	546	3	111			0.345	1.07048	1.31594	S	S	10
334	-135	0.515	547	3	112	0.515						M	10
335	-45	0.38	547	3	112		0.38					M	10
336	-26.565	0.201	547	3	112			0.201	1.35526	1.89055	M	M	10
337	-158.199	0.769	548	3	113	0.769						M	10
338	-63.435	0.304	548	3	113		0.304					M	10
339	-90	0.17	548	3	113			0.17	2.52961	1.78824	M	M	10
340	-63.435	0.91	549	3	114	0.91						M	10
341	30.964	0.765	549	3	114		0.765					M	10
342	-153.435	0.347	549	3	114			0.347	1.18954	2.20461	M	M	10
343	144.462	1.128	550	3	115	1.128						M	10
344	-135	0.299	550	3	115		0.299					M	10
345	-90	0.132	550	3	115			0.132	3.77258	2.26515	M	M	10
346	45	1.176	551	3	116	1.176						T	10
347	-45	0.566	551	3	116		0.566					T	10
348	-63.435	0.337	551	3	116			0.337	2.07774	1.67953	T	T	10
349	-56.31	1.044	552	3	117	1.044						T	10
350	-116.565	0.248	552	3	117		0.248					T	10
351	0	0.215	552	3	117			0.215	4.20968	1.15349	T	T	10
352	-29.055	1.371	553	3	118	1.371						T	10
353	63.435	0.392	553	3	118		0.392					T	10
354	-116.565	0.261	553	3	118			0.261	3.49745	1.50192	T	T	10
355	135	0.389	554	3	119	0.389						M	10
356	-135	0.364	554	3	119		0.364					M	10
357	-135	0.183	554	3	119			0.183	1.06868	1.98907	M	M	10
358	135	0.369	555	3	120	0.369						S	10
359	0	0.304	555	3	120		0.304					S	10
360	45	0.248	555	3	120			0.248	1.21382	1.22581	S	S	10
361	153.435	0.421	556	3	121	0.421						S	10
362	-135	0.15	556	3	121		0.15					S	10
363	45	0.215	556	3	121			0.215	2.80667	0.697674	S	S	10
364	135	1.044	557	3	122	1.044						T	10
365	-116.565	0.297	557	3	122		0.297					T	10
366	-153.435	0.285	557	3	122			0.285	3.51515	1.04211	T	T	10
367	-53.13	0.713	558	3	123	0.713						S	10
368	-153.435	0.252	558	3	123		0.252					S	10
369	-135	0.15	558	3	123			0.15	2.82937	1.68	S	S	10
370	140.194	1.14	559	3	124	1.14						T	10
371	-153.435	0.273	559	3	124		0.273					T	10
372	0	0.21	559	3	124			0.21	4.17582	1.3	T	T	10
373	-21.801	0.786	560	3	125	0.786						S	10
374	63.435	0.241	560	3	125		0.241					S	10
375	-135	0.248	560	3	125			0.248	3.26141	0.971774	S	S	10
376	156.801	0.993	561	3	126	0.993						M	10
377	-135	0.347	561	3	126		0.347					M	10
378	45	0.183	561	3	126			0.183	2.86167	1.89617	M	M	10
379	135	0.413	562	3	127	0.413						M	10
380	56.31	0.5	562	3	127		0.5					M	10
381	-153.435	0.273	562	3	127			0.273	0.826	1.8315	M	M	10
382	123.69	1.478	563	3	128	1.478						M	10
383	-161.565	0.473	563	3	128		0.473					M	10
384	-135	0.169	563	3	128			0.169	3.12474	2.79882	M	M	10
385	126.87	0.728	564	3	129	0.728						S	10
386	-146.31	0.548	564	3	129		0.548					S	10
387	45	0.383	564	3	129			0.383	1.32847	1.43081	S	S	10
388	135	0.562	565	3	130	0.562						S	10
389	-153.435	0.389	565	3	130		0.389					S	10
390	45	0.413	565	3	130			0.413	1.44473	0.941889	S	S	10
391	158.199	0.909	566	3	131	0.909						S	10
392	-116.565	0.365	566	3	131		0.365					S	10
393	90	0.304	566	3	131			0.304	2.49041	1.20066	S	S	10
394	-59.036	0.785	567	3	132	0.785						S	10
395	-135	0.264	567	3	132		0.264					S	10
396	-90	0.222	567	3	132			0.222	2.97348	1.18919	S	S	10
397	-53.13	0.695	568	3	133	0.695						S	10
398	-135	0.351	568	3	133		0.351					S	10
399	-146.31	0.486	568	3	133			0.486	1.98006	0.722222	S	S	10
400	-21.801	0.732	569	3	134	0.732						S	10
401	-116.565	0.347	569	3	134		0.347					S	10
402	-135	0.253	569	3	134			0.253	2.10951	1.37154	S	S	10
403	14.036	0.621	570	3	135	0.621						S	10
404	-71.565	0.38	570	3	135		0.38					S	10
405	-63.435	0.335	570	3	135			0.335	1.63421	1.13433	S	S	10
406	149.036	0.878	571	3	136	0.878						S	10
407	-116.565	0.266	571	3	136		0.266					S	10
408	-90	0.328	571	3	136			0.328	3.30075	0.810976	S	S	10
409	33.69	1.005	572	3	137	1.005						M	10
410	-71.565	0.441	572	3	137		0.441					M	10
411	135	0.215	572	3	137			0.215	2.27891	2.05116	M	M	10
412	171.87	1.045	573	3	138	1.045						T	10
413	-135	0.38	573	3	138		0.38					T	10
414	-63.435	0.284	573	3	138			0.284	2.75	1.33803	T	T	10
415	-167.471	1.299	574	3	139	1.299						T	10
416	-63.435	0.345	574	3	139		0.345					T	10
417	-63.435	0.248	574	3	139			0.248	3.76522	1.39113	T	T	10
418	18.435	0.949	575	3	140	0.949						M	10
419	-75.964	0.651	575	3	140		0.651					M	10
420	-90	0.261	575	3	140			0.261	1.45776	2.49425	M	M	10
421	80.538	0.902	576	3	141	0.902						S	10
422	153.435	0.273	576	3	141		0.273					S	10
423	0	0.304	576	3	141			0.304	3.30403	0.898026	S	S	10
424	-165.964	0.596	577	3	142	0.596						S	10
425	-90	0.14	577	3	142		0.14					S	10
426	-90	0.148	577	3	142			0.148	4.25714	0.945946	S	S	10
427	60.255	1.115	578	3	143	1.115						T	10
428	-56.31	0.515	578	3	143		0.515					T	10
429	-45	0.446	578	3	143			0.446	2.16505	1.15471	T	T	10
430	180	0.771	579	3	144	0.771						S	10
431	-90	0.305	579	3	144		0.305					S	10
432	-63.435	0.325	579	3	144			0.325	2.52787	0.938462	S	S	10
433	-128.66	0.945	580	3	145	0.945						S	10
434	-33.69	0.439	580	3	145		0.439					S	10
435	-63.435	0.347	580	3	145			0.347	2.15262	1.26513	S	S	10
436	-143.13	0.727	581	3	146	0.727						S	10
437	-63.435	0.389	581	3	146		0.389					S	10
438	-26.565	0.314	581	3	146			0.314	1.86889	1.23885	S	S	10
439	45	0.859	582	3	147	0.859						M	10
440	-45	0.612	582	3	147		0.612					M	10
441	-45	0.332	582	3	147			0.332	1.40359	1.84337	M	M	10
1	-93.18	1.966	583	4	1	1.966						M	10
2	-168.69	0.624	583	4	1		0.624					M	10
3	-161.565	0.278	583	4	1			0.278	3.15064	2.2446	M	M	10
4	-94.399	1.434	584	4	2	1.434						M	10
5	0	0.665	584	4	2		0.665					M	10
6	0	0.147	584	4	2			0.147	2.15639	4.52381	M	M	10
7	-14.036	0.922	585	4	3	0.922						M	10
8	-99.462	0.616	585	4	3		0.616					M	10
9	-90	0.245	585	4	3			0.245	1.49675	2.51429	M	M	10
10	61.928	1.856	586	4	4	1.856						M	10
11	-26.565	0.518	586	4	4		0.518					M	10
12	-26.565	0.273	586	4	4			0.273	3.58301	1.89744	M	M	10
13	86.186	1.69	587	4	5	1.69						M	10
14	30.964	0.673	587	4	5		0.673					M	10
15	-45	0.247	587	4	5			0.247	2.51114	2.7247	M	M	10
16	107.103	1.44	588	4	6	1.44						M	10
17	180	0.385	588	4	6		0.385					M	10
18	26.565	0.151	588	4	6			0.151	3.74026	2.54967	M	M	10
19	54.462	1.024	589	4	7	1.024						M	10
20	-36.87	0.555	589	4	7		0.555					M	10
21	-26.565	0.28	589	4	7			0.28	1.84505	1.98214	M	M	10
22	114.444	1.297	590	4	8	1.297						M	10
23	-168.69	0.565	590	4	8		0.565					M	10
24	0	0.258	590	4	8			0.258	2.29558	2.18992	M	M	10
25	-15.945	0.864	591	4	9	0.864						M	10
26	-90	0.499	591	4	9		0.499					M	10
27	-153.435	0.208	591	4	9			0.208	1.73146	2.39904	M	M	10
28	90	0.991	592	4	10	0.991						S	10
29	180	0.275	592	4	10		0.275					S	10
30	-26.565	0.209	592	4	10			0.209	3.60364	1.31579	S	S	10
31	71.565	0.691	593	4	11	0.691						S	10
32	-18.435	0.383	593	4	11		0.383					S	10
33	0	0.281	593	4	11			0.281	1.80418	1.36299	S	S	10
34	60.945	1.152	594	4	12	1.152						T	10
35	-18.435	0.321	594	4	12		0.321					T	10
36	-26.565	0.199	594	4	12			0.199	3.58879	1.61307	T	T	10
37	-45	0.558	595	4	13	0.558						S	10
38	-135	0.377	595	4	13		0.377					S	10
39	-135	0.273	595	4	13			0.273	1.48011	1.38095	S	S	10
40	63.435	0.796	596	4	14	0.796						M	10
41	-33.69	0.469	596	4	14		0.469					M	10
42	180	0.223	596	4	14			0.223	1.69723	2.10314	M	M	10
43	-80.538	0.655	597	4	15	0.655						M	10
44	-146.31	0.321	597	4	15		0.321					M	10
45	45	0.158	597	4	15			0.158	2.0405	2.03165	M	M	10
46	68.199	0.649	598	4	16	0.649						M	10
47	-53.13	0.485	598	4	16		0.485					M	10
48	-26.565	0.222	598	4	16			0.222	1.33814	2.18468	M	M	10
49	-57.995	0.979	599	4	17	0.979						S	10
50	-135	0.299	599	4	17		0.299					S	10
51	180	0.276	599	4	17			0.276	3.27425	1.08333	S	S	10
52	-143.13	0.572	600	4	18	0.572						S	10
53	-45	0.313	600	4	18		0.313					S	10
54	-18.435	0.366	600	4	18			0.366	1.82748	0.855191	S	S	10
55	-75.964	0.988	601	4	19	0.988						S	10
56	-135	0.341	601	4	19		0.341					S	10
57	-26.565	0.256	601	4	19			0.256	2.89736	1.33203	S	S	10
58	-150.945	1.202	602	4	20	1.202						T	10
59	-71.565	0.328	602	4	20		0.328					T	10
60	-26.565	0.263	602	4	20			0.263	3.66463	1.24715	T	T	10
61	-45	0.367	603	4	21	0.367						S	10
62	-135	0.275	603	4	21		0.275					S	10
63	-135	0.234	603	4	21			0.234	1.33455	1.17521	S	S	10
64	-126.87	0.576	604	4	22	0.576						M	10
65	-26.565	0.265	604	4	22		0.265					M	10
66	-45	0.132	604	4	22			0.132	2.17358	2.00758	M	M	10
67	122.005	0.973	605	4	23	0.973						S	10
68	-161.565	0.321	605	4	23		0.321					S	10
69	0	0.223	605	4	23			0.223	3.03115	1.43946	S	S	10
70	135	0.637	606	4	24	0.637						S	10
71	-135	0.247	606	4	24		0.247					S	10
72	-153.435	0.23	606	4	24			0.23	2.57895	1.07391	S	S	10
73	-80.538	0.695	607	4	25	0.695						S	10
74	-153.435	0.239	607	4	25		0.239					S	10
75	0	0.147	607	4	25			0.147	2.90795	1.62585	S	S	10
76	-99.462	0.724	608	4	26	0.724						M	10
77	-14.036	0.392	608	4	26		0.392					M	10
78	0	0.184	608	4	26			0.184	1.84694	2.13043	M	M	10
79	-120.964	0.658	609	4	27	0.658						S	10
80	180	0.245	609	4	27		0.245					S	10
81	0	0.148	609	4	27			0.148	2.68571	1.65541	S	S	10
82	-153.435	0.703	610	4	28	0.703						M	10
83	-53.13	0.51	610	4	28		0.51					M	10
84	-45	0.273	610	4	28			0.273	1.37843	1.86813	M	M	10
85	71.565	0.383	611	4	29	0.383						S	10
86	-26.565	0.199	611	4	29		0.199					S	10
87	0	0.134	611	4	29			0.134	1.92462	1.48507	S	S	10
88	-71.565	0.717	612	4	30	0.717						M	10
89	26.565	0.477	612	4	30		0.477					M	10
90	0	0.223	612	4	30			0.223	1.50314	2.13901	M	M	10
91	116.565	0.804	613	4	31	0.804						S	10
92	-153.435	0.271	613	4	31		0.271					S	10
93	26.565	0.198	613	4	31			0.198	2.96679	1.36869	S	S	10
94	-150.945	1.193	614	4	32	1.193						T	10
95	-45	0.325	614	4	32		0.325					T	10
96	-63.435	0.198	614	4	32			0.198	3.67077	1.64141	T	T	10
97	39.806	0.858	615	4	33	0.858						S	10
98	-56.31	0.423	615	4	33		0.423					S	10
99	-63.435	0.271	615	4	33			0.271	2.02837	1.56089	S	S	10
100	-149.036	0.724	616	4	34	0.724						S	10
101	-63.435	0.287	616	4	34		0.287					S	10
102	-45	0.199	616	4	34			0.199	2.52265	1.44221	S	S	10
103	30.964	0.642	617	4	35	0.642						M	10
104	123.69	0.419	617	4	35		0.419					M	10
105	153.435	0.173	617	4	35			0.173	1.53222	2.42197	M	M	10
106	37.405	2.328	618	4	36	2.328						M	10
107	-45	0.377	618	4	36		0.377					M	10
108	-63.435	0.214	618	4	36			0.214	6.17507	1.76168	M	M	10
109	-149.036	0.657	619	4	37	0.657						M	10
110	-33.69	0.367	619	4	37		0.367					M	10
111	-63.435	0.208	619	4	37			0.208	1.79019	1.76442	M	M	10
112	-156.038	1.051	620	4	38	1.051						M	10
113	-45	0.636	620	4	38		0.636					M	10
114	-63.435	0.239	620	4	38			0.239	1.65252	2.66109	M	M	10
115	56.31	0.779	621	4	39	0.779						S	10
116	-18.435	0.343	621	4	39		0.343					S	10
117	0	0.281	621	4	39			0.281	2.27114	1.22064	S	S	10
118	-90	0.698	622	4	40	0.698						S	10
119	18.435	0.372	622	4	40		0.372					S	10
120	-63.435	0.224	622	4	40			0.224	1.87634	1.66071	S	S	10
121	-172.875	0.888	623	4	41	0.888						S	10
122	-71.565	0.378	623	4	41		0.378					S	10
123	-63.435	0.223	623	4	41			0.223	2.34921	1.69507	S	S	10
124	-38.66	1.459	624	4	42	1.459						M	10
125	38.66	0.675	624	4	42		0.675					M	10
126	-116.565	0.25	624	4	42			0.25	2.16148	2.7	M	M	10
127	9.462	0.65	625	4	43	0.65						S	10
128	-63.435	0.314	625	4	43		0.314					S	10
129	-90	0.221	625	4	43			0.221	2.07006	1.42081	S	S	10
130	-90	0.422	626	4	44	0.422						S	10
131	-161.565	0.314	626	4	44		0.314					S	10
132	180	0.257	626	4	44			0.257	1.34395	1.22179	S	S	10
133	47.726	1.625	627	4	45	1.625						M	10
134	-33.69	0.448	627	4	45		0.448					M	10
135	-45	0.164	627	4	45			0.164	3.62723	2.73171	M	M	10
136	-118.61	1.338	628	4	46	1.338						M	10
137	-36.87	0.485	628	4	46		0.485					M	10
138	0	0.202	628	4	46			0.202	2.75876	2.40099	M	M	10
139	33.69	0.749	629	4	47	0.749						S	10
140	-56.31	0.337	629	4	47		0.337					S	10
141	-26.565	0.208	629	4	47			0.208	2.22255	1.62019	S	S	10
142	63.435	0.668	630	4	48	0.668						S	10
143	-33.69	0.451	630	4	48		0.451					S	10
144	146.31	0.29	630	4	48			0.29	1.48115	1.55517	S	S	10
145	38.66	0.675	631	4	49	0.675						S	10
146	-45	0.338	631	4	49		0.338					S	10
147	-26.565	0.25	631	4	49			0.25	1.99704	1.352	S	S	10
148	-135	0.403	632	4	50	0.403						S	10
149	-63.435	0.214	632	4	50		0.214					S	10
150	-45	0.174	632	4	50			0.174	1.88318	1.22989	S	S	10
151	-12.529	1.024	633	4	51	1.024						M	10
152	-108.435	0.395	633	4	51		0.395					M	10
153	-90	0.205	633	4	51			0.205	2.59241	1.92683	M	M	10
154	45	0.545	634	4	52	0.545						M	10
155	-56.31	0.416	634	4	52		0.416					M	10
156	116.565	0.214	634	4	52			0.214	1.3101	1.94393	M	M	10
157	-104.036	0.873	635	4	53	0.873						M	10
158	153.435	0.501	635	4	53		0.501					M	10
159	0	0.227	635	4	53			0.227	1.74251	2.20705	M	M	10
160	-119.745	0.938	636	4	54	0.938						M	10
161	-45	0.301	636	4	54		0.301					M	10
162	-45	0.158	636	4	54			0.158	3.11628	1.90506	M	M	10
163	30.964	0.654	637	4	55	0.654						S	10
164	-63.435	0.29	637	4	55		0.29					S	10
165	-63.435	0.241	637	4	55			0.241	2.25517	1.20332	S	S	10
166	45	0.52	638	4	56	0.52						S	10
167	-63.435	0.247	638	4	56		0.247					S	10
168	-63.435	0.205	638	4	56			0.205	2.10526	1.20488	S	S	10
169	-153.435	0.444	639	4	57	0.444						S	10
170	-63.435	0.205	639	4	57		0.205					S	10
171	-63.435	0.273	639	4	57			0.273	2.16585	0.750916	S	S	10
172	-161.565	0.378	640	4	58	0.378						S	10
173	116.565	0.198	640	4	58		0.198					S	10
174	135	0.214	640	4	58			0.214	1.90909	0.925234	S	S	10
175	17.103	1.44	641	4	59	1.44						M	10
176	-39.806	0.87	641	4	59		0.87					M	10
177	-90	0.205	641	4	59			0.205	1.65517	4.2439	M	M	10
178	171.87	0.846	642	4	60	0.846						S	10
179	-90	0.314	642	4	60		0.314					S	10
180	-90	0.202	642	4	60			0.202	2.69427	1.55446	S	S	10
181	170.538	0.613	643	4	61	0.613						M	10
182	-90	0.258	643	4	61		0.258					M	10
183	-90	0.128	643	4	61			0.128	2.37597	2.01562	M	M	10
184	-108.435	1.045	644	4	62	1.045						M	10
185	0	0.537	644	4	62		0.537					M	10
186	0	0.239	644	4	62			0.239	1.946	2.24686	M	M	10
187	-60.255	0.871	645	4	63	0.871						M	10
188	-146.31	0.753	645	4	63		0.753					M	10
189	33.69	0.356	645	4	63			0.356	1.15671	2.11517	M	M	10
190	-12.529	1.044	646	4	64	1.044						M	10
191	71.565	0.408	646	4	64		0.408					M	10
192	-90	0.239	646	4	64			0.239	2.55882	1.70711	M	M	10
193	32.471	1.395	647	4	65	1.395						T	10
194	-56.31	0.346	647	4	65		0.346					T	10
195	-63.435	0.239	647	4	65			0.239	4.03179	1.4477	T	T	10
196	-147.095	2.225	648	4	66	2.225						T	10
197	-75.964	0.444	648	4	66		0.444					T	10
198	-90	0.281	648	4	66			0.281	5.01126	1.58007	T	T	10
199	-60.255	0.903	649	4	67	0.903						S	10
200	-135	0.364	649	4	67		0.364					S	10
201	0	0.296	649	4	67			0.296	2.48077	1.22973	S	S	10
202	63.435	0.967	650	4	68	0.967						M	10
203	-33.69	0.394	650	4	68		0.394					M	10
204	-63.435	0.173	650	4	68			0.173	2.45431	2.27746	M	M	10
205	63.435	0.749	651	4	69	0.749						M	10
206	-33.69	0.296	651	4	69		0.296					M	10
207	-26.565	0.173	651	4	69			0.173	2.53041	1.71098	M	M	10
208	-15.945	0.855	652	4	70	0.855						S	10
209	-56.31	0.305	652	4	70		0.305					S	10
210	-153.435	0.285	652	4	70			0.285	2.80328	1.07018	S	S	10
211	126.87	0.585	653	4	71	0.585						M	10
212	-153.435	0.296	653	4	71		0.296					M	10
213	-153.435	0.173	653	4	71			0.173	1.97635	1.71098	M	M	10
214	104.036	0.477	654	4	72	0.477						S	10
215	180	0.258	654	4	72		0.258					S	10
216	0	0.184	654	4	72			0.184	1.84884	1.40217	S	S	10
217	-90	0.317	655	4	73	0.317						S	10
218	165.964	0.368	655	4	73		0.368					S	10
219	-26.565	0.239	655	4	73			0.239	0.861413	1.53975	S	S	10
220	-174.806	1.159	656	4	74	1.159						M	10
221	-80.538	0.628	656	4	74		0.628					M	10
222	-90	0.239	656	4	74			0.239	1.84554	2.62762	M	M	10
223	-36.87	1.101	657	4	75	1.101						T	10
224	-135	0.265	657	4	75		0.265					T	10
225	33.69	0.331	657	4	75			0.331	4.15472	0.800604	T	T	10
226	-99.462	0.683	658	4	76	0.683						M	10
227	146.31	0.419	658	4	76		0.419					M	10
228	0	0.227	658	4	76			0.227	1.63007	1.84581	M	M	10
229	-116.565	0.485	659	4	77	0.485						S	10
230	-18.435	0.287	659	4	77		0.287					S	10
231	0	0.203	659	4	77			0.203	1.6899	1.41379	S	S	10
232	84.806	1.195	660	4	78	1.195						T	10
233	-33.69	0.441	660	4	78		0.441					T	10
234	0	0.296	660	4	78			0.296	2.70975	1.48986	T	T	10
235	52.125	1.201	661	4	79	1.201						M	10
236	-36.87	0.529	661	4	79		0.529					M	10
237	180	0.215	661	4	79			0.215	2.27032	2.46047	M	M	10
1	-135	0.724	662	5	1	0.724						M	10
2	-14.036	0.543	662	5	1		0.543					M	10
3	-45	0.298	662	5	1			0.298	1.33333	1.82215	M	M	10
4	-90	0.769	663	5	2	0.769						M	10
5	0	0.512	663	5	2		0.512					M	10
6	0	0.28	663	5	2			0.28	1.50195	1.82857	M	M	10
7	-156.801	1.097	664	5	3	1.097						M	10
8	-45	0.712	664	5	3		0.712					M	10
9	-71.565	0.412	664	5	3			0.412	1.54073	1.72816	M	M	10
10	101.31	0.706	665	5	4	0.706						S	10
11	-161.565	0.429	665	5	4		0.429					S	10
12	0	0.395	665	5	4			0.395	1.64569	1.08608	S	S	10
13	80.538	1.692	666	5	5	1.692						M	10
14	135	0.543	666	5	5		0.543					M	10
15	0	0.302	666	5	5			0.302	3.11602	1.79801	M	M	10
[truncated: 1,230 more rows]
[truncated: 8 more columns]

## Sheet: tg
					SPINES								DENDRITES												1.13522	0.643754	#DIV/0!			379	1.24838	0.773861			396	0.74567	0.509842			219	1.35265	0.566569			5	#VALUE!		#VALUE!	#VALUE!
Count	Angle	Length	Spine No. (Tot)	Neuron No.	Spine No.	Length	Width	Neck	RATIO L/W	RATIO W/N	TYPE	TYPE!	Neuron No.	Length		Length	Width	Neck	RATIO L/W	RATIO W/N			TYPE!	Neuron No.	Length	Width	Spines/10 mm	Neuron No.	TYPE!	No	Length	Width	Neuron No.	TYPE!	No	Length	Width	Neuron No.	TYPE!	No	Length	Width	Neuron No.	TYPE!		TOT	SPINES	M	S
1	63.435	1.851	1	1	1	1.851						M	1	76.421									<>P	1	1.38447	0.817118	4.44904	1	M	28	1.44821	0.855393	1	S	2	0.878	0.5345	1	T	4	1.1915	0.6905	1	P	0	34	34	82.3529	5.88235
2	-30.964	0.885	1	1	1		0.885					M	2	77.411	Average	1.07816	0.596049	0.543451	1.94583	1.45471			TYPE!	Neuron No.				Neuron No.	TYPE!				Neuron No.	TYPE!				Neuron No.	TYPE!				Neuron No.	TYPE!
3	-33.69	0.493	1	1	1			0.493	2.09153	1.79513	M	M	2	21.228	Std. Dev.	0.485656	0.260224	0.356821	0.828897	0.781172			<>P	2	1.17875	0.609659	8.14957	2	M	48	1.34771	0.77175	2	S	42	0.805476	0.52281	2	T	48	1.3364	0.523563	2	P	0	138	138	34.7826	30.4348
4	45	1.433	2	1	2	1.433						M	2	31.999	Std. Err.	0.0152892	0.00819222	0.0112332	0.0260949	0.0245924			TYPE!	Neuron No.				Neuron No.	TYPE!				Neuron No.	TYPE!				Neuron No.	TYPE!				Neuron No.	TYPE!
5	-56.31	1.065	2	1	2		1.065					M	2	38.696									<>P	3	1.15407	0.688571	8.20729	3	M	7	1.24614	0.877571	3	S	3	0.708	0.390333	3	T	4	1.3275	0.5815	3	P	0	14	14	50	21.4286
6	-45	0.411	2	1	2			0.411	1.34554	2.59124	M	M	3	17.058									TYPE!	Neuron No.				Neuron No.	TYPE!				Neuron No.	TYPE!				Neuron No.	TYPE!				Neuron No.	TYPE!
7	-53.973	1.846	3	1	3	1.846						M	4	30.15									<>P	4	1.02807	0.606581	7.02018	4	M	23	1.03565	0.663565	4	S	10	0.6613	0.5426	4	T	10	1.3774	0.5395	4	P	0	43	43	53.4884	23.2558
8	35.538	1.2	3	1	3		1.2					M	4	31.102	No of Spines	1009							TYPE!	Neuron No.				Neuron No.	TYPE!				Neuron No.	TYPE!				Neuron No.	TYPE!				Neuron No.	TYPE!
9	18.435	0.458	3	1	3			0.458	1.53833	2.62009	M	M	5	33.022	No of Neurons	10							<>P	5	1.13648	0.518361	9.07914	5	M	27	1.27707	0.643926	5	S	20	0.74225	0.41805	5	T	14	1.4285	0.4195	5	P	0	61	61	44.2623	32.7869
10	-90	0.977	4	1	4	0.977						M	5	34.165	Tot. Dendrites Length	1349.32							TYPE!	Neuron No.				Neuron No.	TYPE!				Neuron No.	TYPE!				Neuron No.	TYPE!				Neuron No.	TYPE!
11	180	0.628	4	1	4		0.628					M	6	109.356	Spines per 10 mm	7.47786							<>P	6	0.697735	0.391903	6.08654	6	M	23	1.152	0.701652	6	S	227	0.61052	0.35104	6	T	18	1.21717	0.511444	6	P	0	268	268	8.58209	84.7015
12	0	0.302	4	1	4			0.302	1.55573	2.07947	M	M	6	50.361									TYPE!	Neuron No.				Neuron No.	TYPE!				Neuron No.	TYPE!				Neuron No.	TYPE!				Neuron No.	TYPE!
13	-150.255	1.161	5	1	5	1.161						M	6	18.786		TYPE	TYPE	TYPE	TYPE	TOT	TOT		<>P	7	1.1166	0.623685	12.7232	7	M	87	1.18187	0.714701	7	S	42	0.786095	0.514119	7	T	33	1.36515	0.523182	7	P	0	162	162	53.7037	25.9259
14	-56.31	0.968	5	1	5		0.968					M	6	38.221		M	S	T	P		SPINES		TYPE!	Neuron No.				Neuron No.	TYPE!				Neuron No.	TYPE!				Neuron No.	TYPE!				Neuron No.	TYPE!
15	-56.31	0.503	5	1	5			0.503	1.19938	1.92445	M	M	6	43.277	No	385	397	222	5	1009	1004		<>P	8	0.971227	0.671909	8.58419	8	M	23	1.00422	0.785478	8	S	11	0.665455	0.527	8	T	10	1.2317	0.5701	8	P	0	44	44	52.2727	25
16	48.366	1.677	6	1	6	1.677						M	6	21.283	% TOT	0.381566	0.393459	0.22002	0.0049554	1	0.995045		TYPE!	Neuron No.				Neuron No.	TYPE!				Neuron No.	TYPE!				Neuron No.	TYPE!				Neuron No.	TYPE!
17	-59.036	0.858	6	1	6		0.858					M	6	61.715	% SPINES	0.383466	0.395418	0.221116		1			<>P	9	1.28806	0.765468	8.41126	9	M	58	1.30736	0.906586	9	S	22	0.778773	0.680636	9	T	44	1.51725	0.621864	9	P	3	127	124	46.7742	17.7419
18	-45	0.411	6	1	6			0.411	1.95455	2.08759	M	M	6	18.956									TYPE!	Neuron No.				Neuron No.	TYPE!				Neuron No.	TYPE!				Neuron No.	TYPE!				Neuron No.	TYPE!
19	90	1.14	7	1	7	1.14						M	6	24.1	Parameter								<>P	10	1.39679	0.744284	6.27066	10	M	55	1.48354	0.817984	10	S	17	0.820833	0.617333	10	T	34	1.53397	0.684541	10	P	2	108	106	51.8868	16.0377
20	-161.565	0.787	7	1	7		0.787					M	6	54.261	RATIO W/N	1.7							TYPE!						TYPE!					TYPE!					TYPE!					TYPE!
21	0	0.442	7	1	7			0.442	1.44854	1.78054	M	M	7	31.423	H P	5							<>P				#DIV/0!		M					S					T					P		#VALUE!	#VALUE!	#VALUE!	#VALUE!
22	129.806	1.07	8	1	8	1.07						M	7	30.226	H M	3							TYPE!						TYPE!					TYPE!					TYPE!					TYPE!
23	-135	0.594	8	1	8		0.594					M	7	26.159	H S	1							<>P				#DIV/0!		M					S					T					P		#VALUE!	#VALUE!	#VALUE!	#VALUE!
24	45	0.271	8	1	8			0.271	1.80135	2.19188	M	M	7	13.388									TYPE!						TYPE!					TYPE!					TYPE!					TYPE!
25	-82.875	1.118	9	1	9	1.118						M	7	18.022									<>P				#DIV/0!		M					S					T					P		#VALUE!	#VALUE!	#VALUE!	#VALUE!
26	11.31	0.721	9	1	9		0.721					M	7	8.108									TYPE!						TYPE!					TYPE!					TYPE!					TYPE!
27	26.565	0.352	9	1	9			0.352	1.55062	2.0483	M	M	8	51.257	#1393	neuron1-4							<>P				#DIV/0!		M					S					T					P		#VALUE!	#VALUE!	#VALUE!	#VALUE!
28	-100.784	2.978	10	1	10	2.978						M	9	30.899	#1396	neurons5-8							TYPE!						TYPE!					TYPE!					TYPE!					TYPE!
29	-18.435	0.787	10	1	10		0.787					M	9	65.982	#1399	neurons 9-10		Neuron	NECK				<>P				#DIV/0!		M					S					T					P		#VALUE!	#VALUE!	#VALUE!	#VALUE!
30	0	0.398	10	1	10			0.398	3.78399	1.97739	M	M	9	54.107									TYPE!						TYPE!					TYPE!					TYPE!					TYPE!
31	-165.964	0.51	11	1	11	0.51						M	10	35.024				1	0.400206				<>P				#DIV/0!		M					S					T					P		#VALUE!	#VALUE!	#VALUE!	#VALUE!
32	-39.806	0.995	11	1	11		0.995					M	10	58.503	Length	Width	Neck						TYPE!						TYPE!					TYPE!					TYPE!					TYPE!
33	-56.31	0.429	11	1	11			0.429	0.512563	2.31935	M	M	10	46.428	1.06956	0.593936	0.543562	2	0.396935				<>P				#DIV/0!		M					S					T					P		#VALUE!	#VALUE!	#VALUE!	#VALUE!
34	38.66	0.923	12	1	12	0.923						S	10	34.856	0.466811	0.257571	0.3575						TYPE!						TYPE!					TYPE!					TYPE!					TYPE!
35	-53.13	0.674	12	1	12		0.674					S	10	13.367	1004			3	0.383429				<>P				#DIV/0!		M					S					T					P		#VALUE!	#VALUE!	#VALUE!	#VALUE!
36	-45	0.576	12	1	12			0.576	1.36944	1.17014	S	S	10										TYPE!						TYPE!					TYPE!					TYPE!					TYPE!
37	-66.801	1.157	13	1	13	1.157						T	10					4	0.363116				<>P				#DIV/0!		M					S					T					P		#VALUE!	#VALUE!	#VALUE!	#VALUE!
38	36.87	0.777	13	1	13		0.777					T	10										TYPE!						TYPE!					TYPE!					TYPE!					TYPE!
39	18.435	0.523	13	1	13			0.523	1.48906	1.48566	T	T	10					5	0.318672				<>P				#DIV/0!		M					S					T					P		#VALUE!	#VALUE!	#VALUE!	#VALUE!
40	-153.435	0.833	14	1	14	0.833						S	10										TYPE!						TYPE!					TYPE!					TYPE!					TYPE!
41	-45	0.395	14	1	14		0.395					S	10					6	0.946903				<>P				#DIV/0!		M					S					T					P		#VALUE!	#VALUE!	#VALUE!	#VALUE!
42	-45	0.346	14	1	14			0.346	2.10886	1.14162	S	S	10										TYPE!						TYPE!					TYPE!					TYPE!					TYPE!
43	116.565	0.926	15	1	15	0.926						M	10					7	0.361994				<>P				#DIV/0!		M					S					T					P		#VALUE!	#VALUE!	#VALUE!	#VALUE!
44	36.87	0.678	15	1	15		0.678					M	10
45	0	0.281	15	1	15			0.281	1.36578	2.41281	M	M	10					8	0.373864
46	138.814	1.562	16	1	16	1.562						M	10
47	63.435	0.959	16	1	16		0.959					M	10					9	0.448758
48	-135	0.33	16	1	16			0.33	1.62878	2.90606	M	M	10
49	74.055	1.007	17	1	17	1.007						T	10					10	0.452793
50	-14.036	0.589	17	1	17		0.589					T	10
51	0	0.467	17	1	17			0.467	1.70968	1.26124	T	T	10
52	66.801	1.062	18	1	18	1.062						T	10
53	-30.964	0.75	18	1	18		0.75					T	10
54	0	0.514	18	1	18			0.514	1.416	1.45914	T	T	10
55	-85.236	1.71	19	1	19	1.71						M	10
56	9.462	0.807	19	1	19		0.807					M	10
57	0	0.421	19	1	19			0.421	2.11896	1.91686	M	M	10
58	112.62	1.74	20	1	20	1.74						M	10
59	18.435	0.876	20	1	20		0.876					M	10
60	0	0.488	20	1	20			0.488	1.9863	1.79508	M	M	10
61	-119.745	2.206	21	1	21	2.206						M	10
62	-30.964	0.898	21	1	21		0.898					M	10
63	-33.69	0.523	21	1	21			0.523	2.45657	1.71702	M	M	10
64	94.764	1.708	22	1	22	1.708						M	10
65	-164.055	0.898	22	1	22		0.898					M	10
66	0	0.512	22	1	22			0.512	1.902	1.75391	M	M	10
67	-112.62	1.766	23	1	23	1.766						M	10
68	-29.745	1.097	23	1	23		1.097					M	10
69	-18.435	0.441	23	1	23			0.441	1.60985	2.48753	M	M	10
70	-116.565	1.54	24	1	24	1.54						T	10
71	-26.565	0.646	24	1	24		0.646					T	10
72	-26.565	0.385	24	1	24			0.385	2.3839	1.67792	T	T	10
73	-146.31	1.496	25	1	25	1.496						M	10
74	-59.036	0.781	25	1	25		0.781					M	10
75	-45	0.379	25	1	25			0.379	1.91549	2.06069	M	M	10
76	90	1.023	26	1	26	1.023						M	10
77	0	0.704	26	1	26		0.704					M	10
78	-18.435	0.383	26	1	26			0.383	1.45312	1.83812	M	M	10
79	59.036	0.877	27	1	27	0.877						M	10
80	-36.87	0.61	27	1	27		0.61					M	10
81	-26.565	0.303	27	1	27			0.303	1.4377	2.0132	M	M	10
82	-100.305	1.61	28	1	28	1.61						M	10
83	-8.13	0.937	28	1	28		0.937					M	10
84	-26.565	0.329	28	1	28			0.329	1.71825	2.84802	M	M	10
85	-106.699	1.348	29	1	29	1.348						M	10
86	-30.964	0.697	29	1	29		0.697					M	10
87	0	0.303	29	1	29			0.303	1.934	2.30033	M	M	10
88	123.69	1.548	30	1	30	1.548						M	10
89	-146.31	0.56	30	1	30		0.56					M	10
90	26.565	0.284	30	1	30			0.284	2.76429	1.97183	M	M	10
91	-59.036	0.845	31	1	31	0.845						M	10
92	33.69	0.477	31	1	31		0.477					M	10
93	0	0.234	31	1	31			0.234	1.77149	2.03846	M	M	10
94	-129.289	1.914	32	1	32	1.914						M	10
95	-45	0.592	32	1	32		0.592					M	10
96	0	0.294	32	1	32			0.294	3.23311	2.01361	M	M	10
97	-9.462	0.849	33	1	33	0.849						M	10
98	86.186	1.985	33	1	33		1.985					M	10
99	0	0.442	33	1	33			0.442	0.427708	4.49095	M	M	10
100	-79.695	1.661	34	1	34	1.661						M	10
101	0	0.907	34	1	34		0.907					M	10
102	-153.435	0.379	34	1	34			0.379	1.83131	2.39314	M	M	10
1	161.565	1.404	35	2	1	1.404						T	10
2	-90	0.398	35	2	1		0.398					T	10
3	-90	0.39	35	2	1			0.39	3.52764	1.02051	T	T	10
4	-158.199	0.719	36	2	2	0.719						S	10
5	-53.13	0.629	36	2	2		0.629					S	10
6	-71.565	0.408	36	2	2			0.408	1.14308	1.54167	S	S	10
7	163.301	1.434	37	2	3	1.434						T	10
8	-135	0.444	37	2	3		0.444					T	10
9	-90	0.364	37	2	3			0.364	3.22973	1.21978	T	T	10
10	57.995	1.229	38	2	4	1.229						T	10
11	-33.69	0.437	38	2	4		0.437					T	10
12	-45	0.398	38	2	4			0.398	2.81236	1.09799	T	T	10
13	164.055	1.016	39	2	5	1.016						T	10
14	-116.565	0.702	39	2	5		0.702					T	10
15	-111.801	0.719	39	2	5			0.719	1.44729	0.976356	T	T	10
16	-14.036	1.142	40	2	6	1.142						T	10
17	-90	0.74	40	2	6		0.74					T	10
18	-90	0.528	40	2	6			0.528	1.54324	1.40152	T	T	10
19	156.801	1.047	41	2	7	1.047						M	10
20	-126.87	0.736	41	2	7		0.736					M	10
21	71.565	0.421	41	2	7			0.421	1.42255	1.74822	M	M	10
22	147.995	1.304	42	2	8	1.304						M	10
23	-135	0.516	42	2	8		0.516					M	10
24	45	0.265	42	2	8			0.265	2.52713	1.94717	M	M	10
25	153.435	0.728	43	2	9	0.728						M	10
26	-126.87	0.684	43	2	9		0.684					M	10
27	63.435	0.361	43	2	9			0.361	1.06433	1.89474	M	M	10
28	-53.13	0.658	44	2	10	0.658						S	10
29	-108.435	0.416	44	2	10		0.416					S	10
30	-135	0.368	44	2	10			0.368	1.58173	1.13043	S	S	10
31	45	0.633	45	2	11	0.633						S	10
32	-45	0.477	45	2	11		0.477					S	10
33	-33.69	0.4	45	2	11			0.4	1.32704	1.1925	S	S	10
34	131.186	1.518	46	2	12	1.518						T	10
35	56.31	0.477	46	2	12		0.477					T	10
36	63.435	0.349	46	2	12			0.349	3.18239	1.36676	T	T	10
37	-149.036	0.833	47	2	13	0.833						S	10
38	-63.435	0.917	47	2	13		0.917					S	10
39	-53.13	0.671	47	2	13			0.671	0.908397	1.36662	S	S	10
40	-37.875	1.62	48	2	14	1.62						M	10
41	45	0.84	48	2	14		0.84					M	10
42	-116.565	0.398	48	2	14			0.398	1.92857	2.11055	M	M	10
43	-32.471	1.852	49	2	15	1.852						T	10
44	-116.565	0.626	49	2	15		0.626					T	10
45	-153.435	0.379	49	2	15			0.379	2.95847	1.65172	T	T	10
46	116.565	1.488	50	2	16	1.488						M	10
47	33.69	0.516	50	2	16		0.516					M	10
48	63.435	0.265	50	2	16			0.265	2.88372	1.94717	M	M	10
49	-150.255	1.061	51	2	17	1.061						M	10
50	-68.199	0.773	51	2	17		0.773					M	10
51	-90	0.424	51	2	17			0.424	1.37257	1.82311	M	M	10
52	116.565	0.926	52	2	18	0.926						M	10
53	180	0.612	52	2	18		0.612					M	10
54	45	0.33	52	2	18			0.33	1.51307	1.85455	M	M	10
55	63.435	0.988	53	2	19	0.988						M	10
56	153.435	0.614	53	2	19		0.614					M	10
57	-26.565	0.356	53	2	19			0.356	1.60912	1.72472	M	M	10
58	-33.69	0.969	54	2	20	0.969						M	10
59	59.036	0.742	54	2	20		0.742					M	10
60	-135	0.411	54	2	20			0.411	1.30593	1.80535	M	M	10
61	180	1.372	55	2	21	1.372						M	10
62	-90	1.349	55	2	21		1.349					M	10
63	-90	0.628	55	2	21			0.628	1.01705	2.14809	M	M	10
64	167.471	1.25	56	2	22	1.25						T	10
65	-104.036	0.553	56	2	22		0.553					T	10
66	-90	0.442	56	2	22			0.442	2.2604	1.25113	T	T	10
67	-164.055	1.077	57	2	23	1.077						T	10
68	-45	0.792	57	2	23		0.792					T	10
69	-108.435	0.47	57	2	23			0.47	1.35985	1.68511	T	T	10
70	180	1.375	58	2	24	1.375						M	10
71	-90	0.956	58	2	24		0.956					M	10
72	-90	0.372	58	2	24			0.372	1.43828	2.56989	M	M	10
73	-63.435	1.227	59	2	25	1.227						M	10
74	11.31	0.681	59	2	25		0.681					M	10
75	-116.565	0.39	59	2	25			0.39	1.80176	1.74615	M	M	10
76	-51.34	0.857	60	2	26	0.857						S	10
77	53.13	0.661	60	2	26		0.661					S	10
78	-104.036	0.537	60	2	26			0.537	1.29652	1.23091	S	S	10
79	116.565	0.884	61	2	27	0.884						S	10
80	-161.565	0.531	61	2	27		0.531					S	10
81	18.435	0.419	61	2	27			0.419	1.66478	1.2673	S	S	10
82	156.801	1.053	62	2	28	1.053						M	10
83	-135	0.768	62	2	28		0.768					M	10
84	63.435	0.265	62	2	28			0.265	1.37109	2.89811	M	M	10
85	-57.995	1.22	63	2	29	1.22						T	10
86	-135	0.512	63	2	29		0.512					T	10
87	-161.565	0.441	63	2	29			0.441	2.38281	1.161	T	T	10
88	-55.008	1.679	64	2	30	1.679						T	10
89	33.69	0.549	64	2	30		0.549					T	10
90	63.435	0.387	64	2	30			0.387	3.05829	1.4186	T	T	10
91	180	0.978	65	2	31	0.978						M	10
92	-90	0.721	65	2	31		0.721					M	10
93	-90	0.396	65	2	31			0.396	1.35645	1.82071	M	M	10
94	-45	1.941	66	2	32	1.941						M	10
95	56.31	0.968	66	2	32		0.968					M	10
96	-116.565	0.354	66	2	32			0.354	2.00517	2.73446	M	M	10
97	-95.711	1.35	67	2	33	1.35						M	10
98	0	1.093	67	2	33		1.093					M	10
99	14.036	0.467	67	2	33			0.467	1.23513	2.34047	M	M	10
100	138.366	1.682	68	2	34	1.682						T	10
101	-123.69	0.465	68	2	34		0.465					T	10
102	-116.565	0.349	68	2	34			0.349	3.6172	1.33238	T	T	10
103	135	1.266	69	2	35	1.266						M	10
104	45	0.626	69	2	35		0.626					M	10
105	26.565	0.316	69	2	35			0.316	2.02236	1.98101	M	M	10
106	-73.301	1.387	70	2	36	1.387						M	10
107	11.31	0.846	70	2	36		0.846					M	10
108	0	0.333	70	2	36			0.333	1.63948	2.54054	M	M	10
109	97.125	1.07	71	2	37	1.07						M	10
110	21.801	0.699	71	2	37		0.699					M	10
111	0	0.401	71	2	37			0.401	1.53076	1.74314	M	M	10
112	146.31	1.058	72	2	38	1.058						M	10
113	45	0.578	72	2	38		0.578					M	10
114	45	0.291	72	2	38			0.291	1.83045	1.98625	M	M	10
115	171.87	0.986	73	2	39	0.986						S	10
116	71.565	0.514	73	2	39		0.514					S	10
117	-116.565	0.333	73	2	39			0.333	1.91829	1.54354	S	S	10
118	129.806	1.137	74	2	40	1.137						T	10
119	71.565	0.451	74	2	40		0.451					T	10
120	45	0.427	74	2	40			0.427	2.52106	1.05621	T	T	10
121	-38.66	0.806	75	2	41	0.806						S	10
122	-108.435	0.553	75	2	41		0.553					S	10
123	-116.565	0.361	75	2	41			0.361	1.4575	1.53186	S	S	10
124	153.435	1.313	76	2	42	1.313						T	10
125	-123.69	0.427	76	2	42		0.427					T	10
126	-90	0.562	76	2	42			0.562	3.07494	0.759786	T	T	10
127	158.199	0.833	77	2	43	0.833						S	10
128	-104.036	0.52	77	2	43		0.52					S	10
129	-90	0.383	77	2	43			0.383	1.60192	1.3577	S	S	10
130	-60.945	1.44	78	2	44	1.44						T	10
131	45	0.395	78	2	44		0.395					T	10
132	-123.69	0.381	78	2	44			0.381	3.64557	1.03675	T	T	10
133	119.055	1.477	79	2	45	1.477						T	10
134	-126.87	0.596	79	2	45		0.596					T	10
135	45	0.429	79	2	45			0.429	2.47819	1.38928	T	T	10
136	127.569	2.27	80	2	46	2.27						M	10
137	39.806	1.042	80	2	46		1.042					M	10
138	-135	0.313	80	2	46			0.313	2.1785	3.32907	M	M	10
139	-45	1.052	81	2	47	1.052						T	10
140	26.565	0.346	81	2	47		0.346					T	10
141	-116.565	0.288	81	2	47			0.288	3.04046	1.20139	T	T	10
142	161.565	0.895	82	2	48	0.895						S	10
143	-116.565	0.51	82	2	48		0.51					S	10
144	-108.435	0.427	82	2	48			0.427	1.7549	1.19438	S	S	10
145	135	1.596	83	2	49	1.596						M	10
146	36.87	0.707	83	2	49		0.707					M	10
147	45	0.411	83	2	49			0.411	2.25743	1.72019	M	M	10
148	-120.964	0.871	84	2	50	0.871						S	10
149	-45	0.626	84	2	50		0.626					S	10
150	-18.435	0.419	84	2	50			0.419	1.39137	1.49403	S	S	10
151	-144.462	1.219	85	2	51	1.219						M	10
152	-50.194	1.021	85	2	51		1.021					M	10
153	-63.435	0.583	85	2	51			0.583	1.19393	1.75129	M	M	10
154	36.87	1.4	86	2	52	1.4						M	10
155	-51.34	0.843	86	2	52		0.843					M	10
156	-26.565	0.303	86	2	52			0.303	1.66074	2.78218	M	M	10
157	-120.964	0.916	87	2	53	0.916						S	10
158	-59.036	0.781	87	2	53		0.781					S	10
159	-45	0.643	87	2	53			0.643	1.17286	1.21462	S	S	10
160	78.69	0.707	88	2	54	0.707						S	10
161	0	0.512	88	2	54		0.512					S	10
162	-45	0.4	88	2	54			0.4	1.38086	1.28	S	S	10
163	51.34	0.937	89	2	55	0.937						M	10
164	-30.964	0.791	89	2	55		0.791					M	10
165	-45	0.414	89	2	55			0.414	1.18458	1.91063	M	M	10
166	180	1.186	90	2	56	1.186						T	10
167	-90	0.395	90	2	56		0.395					T	10
168	-90	0.302	90	2	56			0.302	3.00253	1.30795	T	T	10
169	163.301	1.471	91	2	57	1.471						M	10
170	36.87	0.74	91	2	57		0.74					M	10
171	90	0.395	91	2	57			0.395	1.98784	1.87342	M	M	10
172	-147.995	1.361	92	2	58	1.361						T	10
173	-45	0.614	92	2	58		0.614					T	10
174	-71.565	0.441	92	2	58			0.441	2.21661	1.39229	T	T	10
175	18.435	0.92	93	2	59	0.92						M	10
176	-75.964	0.614	93	2	59		0.614					M	10
177	-63.435	0.303	93	2	59			0.303	1.49837	2.0264	M	M	10
178	-129.806	1.105	94	2	60	1.105						T	10
179	-56.31	0.498	94	2	60		0.498					T	10
180	-33.69	0.545	94	2	60			0.545	2.21888	0.913761	T	T	10
181	-123.69	0.498	95	2	61	0.498						S	10
182	-33.69	0.56	95	2	61		0.56					S	10
183	-33.69	0.459	95	2	61			0.459	0.889286	1.22004	S	S	10
184	-146.31	1.097	96	2	62	1.097						T	10
185	-56.31	0.51	96	2	62		0.51					T	10
186	-26.565	0.335	96	2	62			0.335	2.15098	1.52239	T	T	10
187	-78.69	1.354	97	2	63	1.354						T	10
188	0	0.559	97	2	63		0.559					T	10
189	18.435	0.474	97	2	63			0.474	2.42218	1.17932	T	T	10
190	-45	0.986	98	2	64	0.986						M	10
191	-126.87	0.79	98	2	64		0.79					M	10
192	-135	0.316	98	2	64			0.316	1.2481	2.5	M	M	10
193	-78.69	0.787	99	2	65	0.787						S	10
194	33.69	0.427	99	2	65		0.427					S	10
195	0	0.419	99	2	65			0.419	1.84309	1.01909	S	S	10
196	-38.66	0.949	100	2	66	0.949						S	10
197	-135	0.581	100	2	66		0.581					S	10
198	-116.565	0.375	100	2	66			0.375	1.63339	1.54933	S	S	10
199	104.036	1.089	101	2	67	1.089						M	10
200	0	0.794	101	2	67		0.794					M	10
201	18.435	0.375	101	2	67			0.375	1.37154	2.11733	M	M	10
202	119.745	1.109	102	2	68	1.109						T	10
203	-161.565	0.471	102	2	68		0.471					T	10
204	26.565	0.354	102	2	68			0.354	2.35456	1.33051	T	T	10
205	40.601	1.332	103	2	69	1.332						M	10
206	-33.69	1	103	2	69		1					M	10
207	-90	0.514	103	2	69			0.514	1.332	1.94553	M	M	10
208	105.945	0.959	104	2	70	0.959						S	10
209	45	0.527	104	2	70		0.527					S	10
210	0	0.442	104	2	70			0.442	1.81973	1.19231	S	S	10
211	122.005	1.336	105	2	71	1.336						T	10
212	18.435	0.449	105	2	71		0.449					T	10
213	45	0.411	105	2	71			0.411	2.9755	1.09246	T	T	10
214	-56.31	1.014	106	2	72	1.014						T	10
215	-135	0.4	106	2	72		0.4					T	10
216	26.565	0.247	106	2	72			0.247	2.535	1.61943	T	T	10
217	163.301	1.581	107	2	73	1.581						T	10
218	-90	0.609	107	2	73		0.609					T	10
219	-108.435	0.447	107	2	73			0.447	2.59606	1.36242	T	T	10
220	135	1.613	108	2	74	1.613						M	10
221	36.87	0.691	108	2	74		0.691					M	10
222	26.565	0.379	108	2	74			0.379	2.3343	1.82322	M	M	10
223	-159.444	1.185	109	2	75	1.185						T	10
224	-56.31	0.559	109	2	75		0.559					T	10
225	-71.565	0.434	109	2	75			0.434	2.11986	1.28802	T	T	10
226	-75.964	1.1	110	2	76	1.1						M	10
227	0	0.792	110	2	76		0.792					M	10
228	180	0.279	110	2	76			0.279	1.38889	2.83871	M	M	10
229	130.601	1.173	111	2	77	1.173						T	10
230	-123.69	0.51	111	2	77		0.51					T	10
231	-135	0.33	111	2	77			0.33	2.3	1.54545	T	T	10
232	131.987	1.95	112	2	78	1.95						T	10
233	45	0.543	112	2	78		0.543					T	10
234	56.31	0.545	112	2	78			0.545	3.59116	0.99633	T	T	10
235	-18.435	1.272	113	2	79	1.272						T	10
236	-123.69	0.523	113	2	79		0.523					T	10
237	-135	0.33	113	2	79			0.33	2.43212	1.58485	T	T	10
238	120.256	1.924	114	2	80	1.924						M	10
239	0	0.815	114	2	80		0.815					M	10
240	26.565	0.346	114	2	80			0.346	2.36074	2.35549	M	M	10
241	146.31	0.545	115	2	81	0.545						S	10
242	45	0.494	115	2	81		0.494					S	10
243	45	0.313	115	2	81			0.313	1.10324	1.57827	S	S	10
244	135	1.135	116	2	82	1.135						M	10
245	45	1.021	116	2	82		1.021					M	10
246	-153.435	0.387	116	2	82			0.387	1.11166	2.63824	M	M	10
247	180	1.047	117	2	83	1.047						T	10
248	-96.34	1.168	117	2	83		1.168					T	10
249	-78.69	0.815	117	2	83			0.815	0.896404	1.43313	T	T	10
250	-71.565	2.235	118	2	84	2.235						M	10
251	7.125	1.109	118	2	84		1.109					M	10
252	-161.565	0.354	118	2	84			0.354	2.01533	3.13277	M	M	10
253	149.036	0.749	119	2	85	0.749						S	10
254	-123.69	0.498	119	2	85		0.498					S	10
255	-108.435	0.397	119	2	85			0.397	1.50402	1.25441	S	S	10
256	90	1.209	120	2	86	1.209						T	10
257	-14.036	0.609	120	2	86		0.609					T	10
258	0	0.628	120	2	86			0.628	1.98522	0.969745	T	T	10
259	35.538	1.168	121	2	87	1.168						M	10
260	-45	0.825	121	2	87		0.825					M	10
261	-90	0.349	121	2	87			0.349	1.41576	2.3639	M	M	10
262	135	0.944	122	2	88	0.944						S	10
263	56.31	0.494	122	2	88		0.494					S	10
264	26.565	0.291	122	2	88			0.291	1.91093	1.69759	S	S	10
265	-7.125	2.233	123	2	89	2.233						T	10
266	-104.036	0.47	123	2	89		0.47					T	10
267	-104.036	0.589	123	2	89			0.589	4.75106	0.797963	T	T	10
268	0	1.071	124	2	90	1.071						T	10
269	-90	0.558	124	2	90		0.558					T	10
270	75.964	0.53	124	2	90			0.53	1.91935	1.05283	T	T	10
271	-45	0.814	125	2	91	0.814						S	10
272	-123.69	0.477	125	2	91		0.477					S	10
273	-116.565	0.395	125	2	91			0.395	1.7065	1.20759	S	S	10
274	-80.538	0.802	126	2	92	0.802						S	10
275	26.565	0.588	126	2	92		0.588					S	10
276	18.435	0.401	126	2	92			0.401	1.36395	1.46633	S	S	10
277	180	1.976	127	2	93	1.976						M	10
278	-80.538	0.819	127	2	93		0.819					M	10
279	-63.435	0.346	127	2	93			0.346	2.4127	2.36705	M	M	10
280	141.34	0.856	128	2	94	0.856						S	10
281	-135	0.576	128	2	94		0.576					S	10
282	-116.565	0.574	128	2	94			0.574	1.48611	1.00348	S	S	10
283	-158.199	0.735	129	2	95	0.735						S	10
284	-53.13	0.614	129	2	95		0.614					S	10
285	-63.435	0.39	129	2	95			0.39	1.19707	1.57436	S	S	10
286	-55.305	2.16	130	2	96	2.16						M	10
287	-158.199	0.739	130	2	96		0.739					M	10
288	-153.435	0.313	130	2	96			0.313	2.92287	2.36102	M	M	10
289	129.806	1.155	131	2	97	1.155						T	10
290	-116.565	0.381	131	2	97		0.381					T	10
291	63.435	0.368	131	2	97			0.368	3.0315	1.03533	T	T	10
292	164.055	1.045	132	2	98	1.045						T	10
293	-108.435	0.499	132	2	98		0.499					T	10
294	63.435	0.333	132	2	98			0.333	2.09419	1.4985	T	T	10
295	38.66	0.825	133	2	99	0.825						S	10
296	-63.435	0.459	133	2	99		0.459					S	10
297	-18.435	0.463	133	2	99			0.463	1.79739	0.991361	S	S	10
298	-63.435	0.959	134	2	100	0.959						M	10
299	33.69	0.477	134	2	100		0.477					M	10
300	0	0.234	134	2	100			0.234	2.01048	2.03846	M	M	10
301	50.194	1.13	135	2	101	1.13						T	10
302	-33.69	0.545	135	2	101		0.545					T	10
303	-18.435	0.447	135	2	101			0.447	2.07339	1.21924	T	T	10
304	-108.435	0.88	136	2	102	0.88						M	10
305	0	0.49	136	2	102		0.49					M	10
306	0	0.257	136	2	102			0.257	1.79592	1.90661	M	M	10
307	90	1.675	137	2	103	1.675						T	10
308	45	0.545	137	2	103		0.545					T	10
309	-26.565	0.323	137	2	103			0.323	3.07339	1.68731	T	T	10
310	63.435	1.509	138	2	104	1.509						T	10
311	-56.31	0.494	138	2	104		0.494					T	10
312	-11.31	0.583	138	2	104			0.583	3.05466	0.847341	T	T	10
313	-90	1.002	139	2	105	1.002						T	10
314	-146.31	0.459	139	2	105		0.459					T	10
315	-26.565	0.283	139	2	105			0.283	2.18301	1.62191	T	T	10
316	-71.565	0.801	140	2	106	0.801						S	10
317	33.69	0.568	140	2	106		0.568					S	10
318	26.565	0.343	140	2	106			0.343	1.41021	1.65598	S	S	10
319	-83.66	1.342	141	2	107	1.342						M	10
320	0	0.605	141	2	107		0.605					M	10
321	180	0.326	141	2	107			0.326	2.21818	1.85583	M	M	10
322	-55.008	1.748	142	2	108	1.748						M	10
323	-123.69	0.562	142	2	108		0.562					M	10
324	26.565	0.272	142	2	108			0.272	3.11032	2.06618	M	M	10
325	-60.255	1.149	143	2	109	1.149						T	10
326	-104.036	0.559	143	2	109		0.559					T	10
327	0	0.373	143	2	109			0.373	2.05546	1.49866	T	T	10
328	100.62	2.229	144	2	110	2.229						M	10
329	23.199	1.089	144	2	110		1.089					M	10
330	-18.435	0.412	144	2	110			0.412	2.04683	2.6432	M	M	10
331	63.435	0.961	145	2	111	0.961						S	10
332	-26.565	0.346	145	2	111		0.346					S	10
333	0	0.372	145	2	111			0.372	2.77746	0.930108	S	S	10
334	14.036	0.523	146	2	112	0.523						S	10
335	-45	0.379	146	2	112		0.379					S	10
336	-63.435	0.316	146	2	112			0.316	1.37995	1.19937	S	S	10
337	147.995	1.353	147	2	113	1.353						T	10
338	-123.69	0.447	147	2	113		0.447					T	10
339	-90	0.306	147	2	113			0.306	3.02685	1.46078	T	T	10
340	26.565	0.989	148	2	114	0.989						S	10
341	-56.31	0.459	148	2	114		0.459					S	10
342	-45	0.395	148	2	114			0.395	2.15468	1.16203	S	S	10
343	56.31	0.998	149	2	115	0.998						S	10
344	-45	0.451	149	2	115		0.451					S	10
345	0	0.324	149	2	115			0.324	2.21286	1.39198	S	S	10
346	180	0.93	150	2	116	0.93						S	10
347	-90	0.396	150	2	116		0.396					S	10
348	-71.565	0.35	150	2	116			0.35	2.34848	1.13143	S	S	10
349	-49.399	1.367	151	2	117	1.367						M	10
350	-135	0.74	151	2	117		0.74					M	10
351	-153.435	0.335	151	2	117			0.335	1.8473	2.20896	M	M	10
352	-146.31	0.909	152	2	118	0.909						S	10
353	-63.435	0.562	152	2	118		0.562					S	10
354	-90	0.52	152	2	118			0.52	1.61744	1.08077	S	S	10
355	53.13	0.641	153	2	119	0.641						S	10
356	-26.565	0.343	153	2	119		0.343					S	10
357	-71.565	0.364	153	2	119			0.364	1.8688	0.942308	S	S	10
358	-41.634	1.617	154	2	120	1.617						T	10
359	-135	0.51	154	2	120		0.51					T	10
360	26.565	0.363	154	2	120			0.363	3.17059	1.40496	T	T	10
361	123.69	1.595	155	2	121	1.595						M	10
362	-161.565	0.387	155	2	121		0.387					M	10
363	-135	0.219	155	2	121			0.219	4.12145	1.76712	M	M	10
364	122.005	1.26	156	2	122	1.26						T	10
365	0	0.451	156	2	122		0.451					T	10
366	63.435	0.28	156	2	122			0.28	2.79379	1.61071	T	T	10
367	165.964	1.15	157	2	123	1.15						M	10
368	-99.462	0.822	157	2	123		0.822					M	10
369	-116.565	0.385	157	2	123			0.385	1.39903	2.13506	M	M	10
370	15.945	0.904	158	2	124	0.904						S	10
371	-71.565	0.489	158	2	124		0.489					S	10
372	-63.435	0.387	158	2	124			0.387	1.84867	1.26357	S	S	10
373	-59.036	0.884	159	2	125	0.884						S	10
374	-161.565	0.396	159	2	125		0.396					S	10
375	-153.435	0.316	159	2	125			0.316	2.23232	1.25316	S	S	10
376	141.34	0.959	160	2	126	0.959						S	10
377	-135	0.493	160	2	126		0.493					S	10
378	-116.565	0.407	160	2	126			0.407	1.94523	1.2113	S	S	10
379	-45	0.774	161	2	127	0.774						S	10
380	-116.565	0.419	161	2	127		0.419					S	10
381	-135	0.28	161	2	127			0.28	1.84726	1.49643	S	S	10
382	-56.31	0.593	162	2	128	0.593						S	10
383	26.565	0.574	162	2	128		0.574					S	10
384	-161.565	0.441	162	2	128			0.441	1.0331	1.30159	S	S	10
385	135	0.74	163	2	129	0.74						M	10
386	56.31	0.628	163	2	129		0.628					M	10
387	-153.435	0.252	163	2	129			0.252	1.17834	2.49206	M	M	10
388	-21.801	0.743	164	2	130	0.743						S	10
389	-104.036	0.457	164	2	130		0.457					S	10
390	-116.565	0.343	164	2	130			0.343	1.62582	1.33236	S	S	10
391	33.69	1.042	165	2	131	1.042						T	10
392	-56.31	0.477	165	2	131		0.477					T	10
393	-90	0.373	165	2	131			0.373	2.18449	1.27882	T	T	10
394	153.435	0.698	166	2	132	0.698						S	10
395	56.31	0.498	166	2	132		0.498					S	10
396	-135	0.33	166	2	132			0.33	1.40161	1.50909	S	S	10
397	138.013	1.941	167	2	133	1.941						M	10
398	45	0.773	167	2	133		0.773					M	10
399	18.435	0.354	167	2	133			0.354	2.511	2.18362	M	M	10
400	-68.199	0.809	168	2	134	0.809						S	10
401	18.435	0.451	168	2	134		0.451					S	10
402	-135	0.362	168	2	134			0.362	1.79379	1.24586	S	S	10
403	-14.036	0.653	169	2	135	0.653						S	10
404	-111.801	0.735	169	2	135		0.735					S	10
405	-90	0.582	169	2	135			0.582	0.888435	1.26289	S	S	10
406	150.255	1.238	170	2	136	1.238						T	10
407	-135	0.592	170	2	136		0.592					T	10
408	-90	0.442	170	2	136			0.442	2.09122	1.33937	T	T	10
409	85.914	2.026	171	2	137	2.026						T	10
410	-18.435	0.39	171	2	137		0.39					T	10
411	63.435	0.323	171	2	137			0.323	5.19487	1.20743	T	T	10
412	145.008	1.741	172	2	138	1.741						T	10
413	-153.435	0.427	172	2	138		0.427					T	10
414	-90	0.63	172	2	138			0.63	4.07728	0.677778	T	T	10
1	180	1.999	173	3	1	1.999						M	10
2	-98.13	0.984	173	3	1		0.984					M	10
3	-90	0.4	173	3	1			0.4	2.0315	2.46	M	M	10
4	-143.13	1.425	174	3	2	1.425						M	10
5	-50.194	1.132	174	3	2		1.132					M	10
6	-45	0.444	174	3	2			0.444	1.25883	2.54955	M	M	10
7	-54.462	1.221	175	3	3	1.221						M	10
8	-135	0.951	175	3	3		0.951					M	10
9	26.565	0.343	175	3	3			0.343	1.28391	2.77259	M	M	10
10	56.31	0.988	176	3	4	0.988						M	10
11	-45	0.797	176	3	4		0.797					M	10
12	0	0.371	176	3	4			0.371	1.23965	2.14825	M	M	10
13	90	0.581	177	3	5	0.581						S	10
14	0	0.478	177	3	5		0.478					S	10
15	0	0.329	177	3	5			0.329	1.21548	1.45289	S	S	10
16	-56.31	0.586	178	3	6	0.586						M	10
17	33.69	0.494	178	3	6		0.494					M	10
18	-153.435	0.257	178	3	6			0.257	1.18623	1.92218	M	M	10
19	33.69	1.542	179	3	7	1.542						T	10
20	-56.31	0.575	179	3	7		0.575					T	10
21	-45	0.36	179	3	7			0.36	2.68174	1.59722	T	T	10
22	68.199	1.451	180	3	8	1.451						T	10
23	135	0.196	180	3	8		0.196					T	10
24	180	0.145	180	3	8			0.145	7.40306	1.35172	T	T	10
25	-81.87	0.992	181	3	9	0.992						M	10
26	180	0.655	181	3	9		0.655					M	10
27	0	0.363	181	3	9			0.363	1.5145	1.80441	M	M	10
28	140.194	1.028	182	3	10	1.028						T	10
29	-143.13	0.647	182	3	10		0.647					T	10
30	0	0.546	182	3	10			0.546	1.58887	1.18498	T	T	10
31	130.601	1.289	183	3	11	1.289						T	10
32	18.435	0.908	183	3	11		0.908					T	10
33	0	0.8	183	3	11			0.8	1.4196	1.135	T	T	10
34	-123.69	1.512	184	3	12	1.512						M	10
35	-39.806	1.13	184	3	12		1.13					M	10
36	-18.435	0.406	184	3	12			0.406	1.33805	2.78325	M	M	10
37	-90	0.908	185	3	13	0.908						S	10
38	0	0.4	185	3	13		0.4					S	10
39	0	0.291	185	3	13			0.291	2.27	1.37457	S	S	10
40	-21.801	0.635	186	3	14	0.635						S	10
41	-116.565	0.293	186	3	14		0.293					S	10
42	-135	0.313	186	3	14			0.313	2.16724	0.936102	S	S	10
1	18.435	0.868	187	4	1	0.868						M	10
2	-75.964	0.593	187	4	1		0.593					M	10
3	-90	0.329	187	4	1			0.329	1.46374	1.80243	M	M	10
4	-113.199	1.062	188	4	2	1.062						T	10
5	-26.565	0.51	188	4	2		0.51					T	10
6	0	0.326	188	4	2			0.326	2.08235	1.56442	T	T	10
7	59.036	0.865	189	4	3	0.865						M	10
8	-33.69	0.512	189	4	3		0.512					M	10
9	-26.565	0.296	189	4	3			0.296	1.68945	1.72973	M	M	10
10	-149.036	0.698	190	4	4	0.698						M	10
11	-33.69	0.563	190	4	4		0.563					M	10
12	-63.435	0.233	190	4	4			0.233	1.23979	2.41631	M	M	10
13	-128.66	0.908	191	4	5	0.908						M	10
14	-36.87	0.587	191	4	5		0.587					M	10
15	-26.565	0.271	191	4	5			0.271	1.54685	2.16605	M	M	10
16	41.186	1.352	192	4	6	1.352						M	10
17	-59.036	0.851	192	4	6		0.851					M	10
18	-26.565	0.343	192	4	6			0.343	1.58872	2.48105	M	M	10
19	-96.34	1.315	193	4	7	1.315						M	10
20	-14.036	0.638	193	4	7		0.638					M	10
21	0	0.373	193	4	7			0.373	2.06113	1.71046	M	M	10
22	90	0.954	194	4	8	0.954						S	10
23	180	0.512	194	4	8		0.512					S	10
24	0	0.302	194	4	8			0.302	1.86328	1.69536	S	S	10
25	-104.036	0.499	195	4	9	0.499						M	10
26	-38.66	0.828	195	4	9		0.828					M	10
27	-18.435	0.441	195	4	9			0.441	0.602657	1.87755	M	M	10
28	-116.565	0.684	196	4	10	0.684						M	10
29	-26.565	0.593	196	4	10		0.593					M	10
30	-26.565	0.323	196	4	10			0.323	1.15346	1.83591	M	M	10
31	-123.69	0.576	197	4	11	0.576						S	10
32	-45	0.414	197	4	11		0.414					S	10
33	-26.565	0.335	197	4	11			0.335	1.3913	1.23582	S	S	10
34	66.801	1.103	198	4	12	1.103						M	10
35	-21.801	0.739	198	4	12		0.739					M	10
36	-26.565	0.31	198	4	12			0.31	1.49256	2.38387	M	M	10
37	-90	0.421	199	4	13	0.421						S	10
38	0	0.582	199	4	13		0.582					S	10
39	0	0.419	199	4	13			0.419	0.723368	1.38902	S	S	10
40	-75.964	1.71	200	4	14	1.71						T	10
41	11.31	0.694	200	4	14		0.694					T	10
42	0	0.535	200	4	14			0.535	2.46398	1.2972	T	T	10
43	-116.565	0.884	201	4	15	0.884						M	10
44	-30.964	0.833	201	4	15		0.833					M	10
45	-33.69	0.439	201	4	15			0.439	1.06122	1.89749	M	M	10
46	54.462	1.293	202	4	16	1.293						T	10
47	-33.69	0.429	202	4	16		0.429					T	10
48	-45	0.33	202	4	16			0.33	3.01399	1.3	T	T	10
49	18.435	0.978	203	4	17	0.978						M	10
50	-63.435	0.687	203	4	17		0.687					M	10
51	-63.435	0.349	203	4	17			0.349	1.42358	1.96848	M	M	10
52	36.87	0.712	204	4	18	0.712						S	10
53	-36.87	0.722	204	4	18		0.722					S	10
54	-45	0.444	204	4	18			0.444	0.98615	1.62613	S	S	10
55	-24.444	1.695	205	4	19	1.695						M	10
56	-108.435	0.471	205	4	19		0.471					M	10
57	-90	0.272	205	4	19			0.272	3.59873	1.73162	M	M	10
58	-108.435	0.457	206	4	20	0.457						S	10
59	-26.565	0.713	206	4	20		0.713					S	10
60	-18.435	0.441	206	4	20			0.441	0.640954	1.61678	S	S	10
61	45	0.545	207	4	21	0.545						S	10
62	-45	0.545	207	4	21		0.545					S	10
63	-33.69	0.427	207	4	21			0.427	1	1.27635	S	S	10
64	-116.565	0.624	208	4	22	0.624						M	10
65	-38.66	0.961	208	4	22		0.961					M	10
66	-18.435	0.479	208	4	22			0.479	0.649324	2.00626	M	M	10
67	97.125	1.122	209	4	23	1.122						M	10
68	-11.31	0.698	209	4	23		0.698					M	10
69	180	0.35	209	4	23			0.35	1.60745	1.99429	M	M	10
70	-59.036	0.897	210	4	24	0.897						S	10
71	-153.435	0.33	210	4	24		0.33					S	10
72	180	0.372	210	4	24			0.372	2.71818	0.887097	S	S	10
73	98.13	0.935	211	4	25	0.935						M	10
74	0	0.442	211	4	25		0.442					M	10
75	0	0.209	211	4	25			0.209	2.11538	2.11483	M	M	10
76	-131.987	1.813	212	4	26	1.813						T	10
77	-45	0.433	212	4	26		0.433					T	10
78	-26.565	0.439	212	4	26			0.439	4.18707	0.986333	T	T	10
79	-65.556	1.685	213	4	27	1.685						M	10
80	23.199	1.041	213	4	27		1.041					M	10
81	18.435	0.474	213	4	27			0.474	1.61864	2.1962	M	M	10
82	-90	0.606	214	4	28	0.606						S	10
83	0	0.63	214	4	28		0.63					S	10
84	180	0.373	214	4	28			0.373	0.961905	1.68901	S	S	10
85	119.745	1.225	215	4	29	1.225						M	10
86	-141.34	0.822	215	4	29		0.822					M	10
87	0	0.466	215	4	29			0.466	1.49027	1.76395	M	M	10
88	39.806	1.052	216	4	30	1.052						M	10
89	-26.565	0.346	216	4	30		0.346					M	10
90	-45	0.197	216	4	30			0.197	3.04046	1.75635	M	M	10
91	-143.13	0.679	217	4	31	0.679						M	10
92	-63.435	0.562	217	4	31		0.562					M	10
93	-63.435	0.265	217	4	31			0.265	1.20819	2.12075	M	M	10
94	-140.194	1.052	218	4	32	1.052						T	10
95	-45	0.806	218	4	32		0.806					T	10
96	-33.69	0.516	218	4	32			0.516	1.30521	1.56202	T	T	10
97	-90	1.14	219	4	33	1.14						T	10
98	180	0.306	219	4	33		0.306					T	10
99	0	0.306	219	4	33			0.306	3.72549	1	T	T	10
100	53.13	0.628	220	4	34	0.628						S	10
101	-45	0.549	220	4	34		0.549					S	10
102	-45	0.471	220	4	34			0.471	1.1439	1.16561	S	S	10
103	-26.565	1.592	221	4	35	1.592						T	10
104	-123.69	0.52	221	4	35		0.52					T	10
105	-90	0.442	221	4	35			0.442	3.06154	1.17647	T	T	10
106	56.31	1.01	222	4	36	1.01						M	10
107	-45	0.723	222	4	36		0.723					M	10
108	-45	0.395	222	4	36			0.395	1.39696	1.83038	M	M	10
109	164.745	1.602	223	4	37	1.602						T	10
110	-90	0.562	223	4	37		0.562					T	10
111	-90	0.398	223	4	37			0.398	2.85053	1.41206	T	T	10
112	-167.471	1.264	224	4	38	1.264						T	10
113	-90	0.651	224	4	38		0.651					T	10
114	-71.565	0.397	224	4	38			0.397	1.94163	1.6398	T	T	10
115	-40.601	1.242	225	4	39	1.242						M	10
116	-135	0.593	225	4	39		0.593					M	10
117	-116.565	0.298	225	4	39			0.298	2.09444	1.98993	M	M	10
118	-170.538	0.817	226	4	40	0.817						S	10
119	-71.565	0.429	226	4	40		0.429					S	10
120	-90	0.256	226	4	40			0.256	1.90443	1.67578	S	S	10
121	151.39	1.771	227	4	41	1.771						M	10
122	63.435	0.656	227	4	41		0.656					M	10
123	-90	0.372	227	4	41			0.372	2.6997	1.76344	M	M	10
124	139.399	1.246	228	4	42	1.246						T	10
125	-123.69	0.484	228	4	42		0.484					T	10
126	-90	0.31	228	4	42			0.31	2.57438	1.56129	T	T	10
127	53.13	0.626	229	4	43	0.626						M	10
128	-18.435	0.523	229	4	43		0.523					M	10
129	-45	0.291	229	4	43			0.291	1.19694	1.79725	M	M	10
1	-56.31	1.457	230	5	1	1.457						T	10
2	-135	0.335	230	5	1		0.335					T	10
3	-153.435	0.437	230	5	1			0.437	4.34925	0.76659	T	T	10
4	123.69	1.033	231	5	2	1.033						T	10
5	180	0.488	231	5	2		0.488					T	10
6	-135	0.355	231	5	2			0.355	2.1168	1.37465	T	T	10
7	-15.255	1.537	232	5	3	1.537						T	10
8	-116.565	0.288	232	5	3		0.288					T	10
9	-135	0.239	232	5	3			0.239	5.33681	1.20502	T	T	10
10	153.435	0.895	233	5	4	0.895						S	10
11	-116.565	0.306	233	5	4		0.306					S	10
12	-153.435	0.335	233	5	4			0.335	2.92484	0.913433	S	S	10
13	108.435	1.339	234	5	5	1.339						M	10
14	11.31	0.707	234	5	5		0.707					M	10
15	0	0.209	234	5	5			0.209	1.89392	3.38278	M	M	10
16	-153.435	1.332	235	5	6	1.332						M	10
17	-68.199	0.816	235	5	6		0.816					M	10
18	-71.565	0.397	235	5	6			0.397	1.63235	2.05542	M	M	10
19	-71.565	0.479	236	5	7	0.479						S	10
20	-161.565	0.395	236	5	7		0.395					S	10
21	-153.435	0.316	236	5	7			0.316	1.21266	1.25	S	S	10
22	60.255	1.001	237	5	8	1.001						T	10
23	-56.31	0.411	237	5	8		0.411					T	10
24	0	0.243	237	5	8			0.243	2.43552	1.69136	T	T	10
25	74.055	0.971	238	5	9	0.971						S	10
26	-33.69	0.433	238	5	9		0.433					S	10
27	180	0.257	238	5	9			0.257	2.24249	1.68482	S	S	10
28	60.255	1.082	239	5	10	1.082						T	10
29	0	0.372	239	5	10		0.372					T	10
30	-26.565	0.26	239	5	10			0.26	2.9086	1.43077	T	T	10
31	-38.66	0.897	240	5	11	0.897						M	10
32	-135	0.411	240	5	11		0.411					M	10
33	180	0.208	240	5	11			0.208	2.18248	1.97596	M	M	10
34	52.125	1.633	241	5	12	1.633						M	10
35	-45	0.578	241	5	12		0.578					M	10
36	-26.565	0.303	241	5	12			0.303	2.82526	1.90759	M	M	10
37	100.305	1.592	242	5	13	1.592						T	10
38	0	0.329	242	5	13		0.329					T	10
39	0	0.257	242	5	13			0.257	4.83891	1.28016	T	T	10
40	9.462	0.908	243	5	14	0.908						S	10
41	-63.435	0.291	243	5	14		0.291					S	10
42	-90	0.306	243	5	14			0.306	3.12027	0.95098	S	S	10
43	74.745	1.511	244	5	15	1.511						M	10
44	-18.435	0.508	244	5	15		0.508					M	10
45	0	0.237	244	5	15			0.237	2.97441	2.14346	M	M	10
46	122.905	2.857	245	5	16	2.857						M	10
47	-153.435	0.562	245	5	16		0.562					M	10
48	-135	0.265	245	5	16			0.265	5.08363	2.12075	M	M	10
49	36.87	1.354	246	5	17	1.354						M	10
50	-68.199	0.687	246	5	17		0.687					M	10
51	-45	0.313	246	5	17			0.313	1.97089	2.19489	M	M	10
52	45	0.941	247	5	18	0.941						S	10
53	-45	0.284	247	5	18		0.284					S	10
54	26.565	0.288	247	5	18			0.288	3.31338	0.986111	S	S	10
55	57.995	1.38	248	5	19	1.38						T	10
56	-33.69	0.484	248	5	19		0.484					T	10
57	180	0.326	248	5	19			0.326	2.85124	1.48466	T	T	10
58	68.199	1.546	249	5	20	1.546						T	10
59	180	0.373	249	5	20		0.373					T	10
60	161.565	0.383	249	5	20			0.383	4.14477	0.97389	T	T	10
61	-45	0.773	250	5	21	0.773						M	10
62	30.964	0.877	250	5	21		0.877					M	10
63	18.435	0.486	250	5	21			0.486	0.881414	1.80453	M	M	10
64	-80.538	1.717	251	5	22	1.717						T	10
65	-161.565	0.396	251	5	22		0.396					T	10
66	0	0.356	251	5	22			0.356	4.33586	1.11236	T	T	10
67	-135	0.792	252	5	23	0.792						S	10
68	-63.435	0.26	252	5	23		0.26					S	10
69	0	0.31	252	5	23			0.31	3.04615	0.83871	S	S	10
70	116.565	0.978	253	5	24	0.978						M	10
71	-165.964	0.581	253	5	24		0.581					M	10
72	-153.435	0.329	253	5	24			0.329	1.6833	1.76596	M	M	10
73	127.875	1.554	254	5	25	1.554						T	10
74	-153.435	0.427	254	5	25		0.427					T	10
75	-153.435	0.281	254	5	25			0.281	3.63934	1.51957	T	T	10
76	59.036	0.76	255	5	26	0.76						M	10
77	-45	0.724	255	5	26		0.724					M	10
78	-18.435	0.395	255	5	26			0.395	1.04972	1.83291	M	M	10
79	36.87	0.777	256	5	27	0.777						M	10
80	-36.87	0.679	256	5	27		0.679					M	10
81	-90	0.177	256	5	27			0.177	1.14433	3.83616	M	M	10
82	-147.995	1.361	257	5	28	1.361						M	10
83	-36.87	0.661	257	5	28		0.661					M	10
84	90	0.208	257	5	28			0.208	2.059	3.17788	M	M	10
85	75.964	0.559	258	5	29	0.559						S	10
86	-33.69	0.6	258	5	29		0.6					S	10
87	-18.435	0.441	258	5	29			0.441	0.931667	1.36054	S	S	10
88	-66.801	0.963	259	5	30	0.963						S	10
89	180	0.516	259	5	30		0.516					S	10
90	0	0.31	259	5	30			0.31	1.86628	1.66452	S	S	10
91	156.801	1.113	260	5	31	1.113						M	10
92	-90	0.954	260	5	31		0.954					M	10
93	45	0.247	260	5	31			0.247	1.16667	3.86235	M	M	10
94	-45	1.761	261	5	32	1.761						T	10
95	-116.565	0.346	261	5	32		0.346					T	10
96	-153.435	0.407	261	5	32			0.407	5.0896	0.850123	T	T	10
97	-45	1.402	262	5	33	1.402						M	10
98	63.435	0.316	262	5	33		0.316					M	10
99	-90	0.149	262	5	33			0.149	4.43671	2.12081	M	M	10
100	-37.875	1.501	263	5	34	1.501						M	10
101	-143.13	0.726	263	5	34		0.726					M	10
102	26.565	0.288	263	5	34			0.288	2.06749	2.52083	M	M	10
103	71.565	0.903	264	5	35	0.903						M	10
104	-36.87	0.674	264	5	35		0.674					M	10
105	0	0.395	264	5	35			0.395	1.33976	1.70633	M	M	10
106	180	0.767	265	5	36	0.767						M	10
107	-90	0.466	265	5	36		0.466					M	10
108	-90	0.234	265	5	36			0.234	1.64592	1.99145	M	M	10
109	-45	0.679	266	5	37	0.679						S	10
110	-135	0.281	266	5	37		0.281					S	10
111	180	0.229	266	5	37			0.229	2.41637	1.22707	S	S	10
112	-53.13	0.707	267	5	38	0.707						S	10
113	180	0.406	267	5	38		0.406					S	10
114	180	0.333	267	5	38			0.333	1.74138	1.21922	S	S	10
115	0	1.907	268	5	39	1.907						T	10
116	-75.964	0.606	268	5	39		0.606					T	10
117	26.565	0.387	268	5	39			0.387	3.14686	1.56589	T	T	10
118	123.69	0.587	269	5	40	0.587						S	10
119	180	0.324	269	5	40		0.324					S	10
120	180	0.356	269	5	40			0.356	1.81173	0.910112	S	S	10
121	149.036	1.679	270	5	41	1.679						M	10
122	-135	0.921	270	5	41		0.921					M	10
123	-108.435	0.451	270	5	41			0.451	1.82302	2.04213	M	M	10
124	78.69	0.711	271	5	42	0.711						S	10
125	0	0.489	271	5	42		0.489					S	10
126	180	0.421	271	5	42			0.421	1.45399	1.16152	S	S	10
127	180	0.744	272	5	43	0.744						S	10
128	-71.565	0.429	272	5	43		0.429					S	10
129	-90	0.302	272	5	43			0.302	1.73427	1.42053	S	S	10
130	81.87	0.954	273	5	44	0.954						M	10
131	146.31	0.512	273	5	44		0.512					M	10
132	-153.435	0.26	273	5	44			0.26	1.86328	1.96923	M	M	10
133	-38.66	0.917	274	5	45	0.917						M	10
134	-116.565	0.427	274	5	45		0.427					M	10
135	-90	0.208	274	5	45			0.208	2.14754	2.05288	M	M	10
136	-66.801	1.176	275	5	46	1.176						T	10
137	-161.565	0.458	275	5	46		0.458					T	10
138	0	0.333	275	5	46			0.333	2.56769	1.37538	T	T	10
139	126.87	0.698	276	5	47	0.698						S	10
140	-153.435	0.312	276	5	47		0.312					S	10
141	-161.565	0.329	276	5	47			0.329	2.23718	0.948328	S	S	10
142	-99.462	0.914	277	5	48	0.914						S	10
143	180	0.558	277	5	48		0.558					S	10
144	0	0.333	277	5	48			0.333	1.63799	1.67568	S	S	10
145	107.354	2.382	278	5	49	2.382						M	10
146	-161.565	0.441	278	5	49		0.441					M	10
147	180	0.256	278	5	49			0.256	5.40136	1.72266	M	M	10
148	-104.036	1.154	279	5	50	1.154						M	10
149	-143.13	0.641	279	5	50		0.641					M	10
150	-45	0.263	279	5	50			0.263	1.80031	2.43726	M	M	10
151	122.471	1.883	280	5	51	1.883						M	10
152	-149.036	0.8	280	5	51		0.8					M	10
153	180	0.283	280	5	51			0.283	2.35375	2.82686	M	M	10
154	63.435	0.583	281	5	52	0.583						S	10
155	-18.435	0.493	281	5	52		0.493					S	10
156	-26.565	0.368	281	5	52			0.368	1.18256	1.33967	S	S	10
157	-59.036	0.811	282	5	53	0.811						M	10
158	33.69	0.444	282	5	53		0.444					M	10
159	45	0.199	282	5	53			0.199	1.82658	2.23116	M	M	10
160	-146.31	0.563	283	5	54	0.563						S	10
161	-45	0.563	283	5	54		0.563					S	10
162	-26.565	0.562	283	5	54			0.562	1	1.00178	S	S	10
163	95.194	1.428	284	5	55	1.428						M	10
164	14.036	0.52	284	5	55		0.52					M	10
165	0	0.302	284	5	55			0.302	2.74615	1.72185	M	M	10
166	-98.13	0.954	285	5	56	0.954						M	10
167	0	0.744	285	5	56		0.744					M	10
168	180	0.257	285	5	56			0.257	1.28226	2.89494	M	M	10
169	0	1.256	286	5	57	1.256						T	10
170	-90	0.56	286	5	57		0.56					T	10
171	-90	0.375	286	5	57			0.375	2.24286	1.49333	T	T	10
172	78.69	0.711	287	5	58	0.711						S	10
173	-18.435	0.52	287	5	58		0.52					S	10
174	153.435	0.31	287	5	58			0.31	1.36731	1.67742	S	S	10
175	-108.435	0.84	288	5	59	0.84						S	10
176	0	0.489	288	5	59		0.489					S	10
177	0	0.398	288	5	59			0.398	1.71779	1.22864	S	S	10
178	-153.435	0.6	289	5	60	0.6						S	10
179	-71.565	0.412	289	5	60		0.412					S	10
180	-71.565	0.419	289	5	60			0.419	1.45631	0.983294	S	S	10
181	119.745	1.061	290	5	61	1.061						M	10
182	26.565	1.009	290	5	61		1.009					M	10
183	0	0.558	290	5	61			0.558	1.05154	1.80824	M	M	10
1	119.745	1.09	291	6	1	1.09						T	10
2	-146.31	0.368	291	6	1		0.368					T	10
3	-153.435	0.323	291	6	1			0.323	2.96196	1.13932	T	T	10
4	0	1.049	292	6	2	1.049						T	10
5	-90	0.863	292	6	2		0.863					T	10
6	-90	0.581	292	6	2			0.581	1.21553	1.48537	T	T	10
7	150.255	1.157	293	6	3	1.157						T	10
8	63.435	0.406	293	6	3		0.406					T	10
9	-108.435	0.346	293	6	3			0.346	2.84975	1.17341	T	T	10
10	0	0.768	294	6	4	0.768						M	10
11	90	0.535	294	6	4		0.535					M	10
12	-90	0.303	294	6	4			0.303	1.43551	1.76568	M	M	10
13	7.125	1.14	295	6	5	1.14						M	10
14	-90	0.488	295	6	5		0.488					M	10
15	-90	0.283	295	6	5			0.283	2.33607	1.72438	M	M	10
16	158.199	0.699	296	6	6	0.699						M	10
17	-108.435	0.324	296	6	6		0.324					M	10
18	-116.565	0.187	296	6	6			0.187	2.15741	1.73262	M	M	10
19	-172.875	1.102	297	6	7	1.102						M	10
20	-90	0.442	297	6	7		0.442					M	10
21	90	0.256	297	6	7			0.256	2.49321	1.72656	M	M	10
22	-157.38	1.861	298	6	8	1.861						M	10
23	-90	1.443	298	6	8		1.443					M	10
24	-90	0.383	298	6	8			0.383	1.28967	3.76762	M	M	10
25	33.69	0.974	299	6	9	0.974						M	10
26	-56.31	0.6	299	6	9		0.6					M	10
27	-90	0.324	299	6	9			0.324	1.62333	1.85185	M	M	10
28	-26.565	0.606	300	6	10	0.606						S	10
29	90	0.243	300	6	10		0.243					S	10
30	-90	0.326	300	6	10			0.326	2.49383	0.745399	S	S	10
31	180	0.868	301	6	11	0.868						M	10
32	-90	0.466	301	6	11		0.466					M	10
33	116.565	0.192	301	6	11			0.192	1.86266	2.42708	M	M	10
34	137.726	2.028	302	6	12	2.028						T	10
35	-126.87	0.563	302	6	12		0.563					T	10
36	-153.435	0.343	302	6	12			0.343	3.60213	1.6414	T	T	10
37	-159.444	1.149	303	6	13	1.149						M	10
38	-56.31	0.531	303	6	13		0.531					M	10
39	-63.435	0.28	303	6	13			0.28	2.16384	1.89643	M	M	10
40	84.806	1.513	304	6	14	1.513						M	10
41	180	0.724	304	6	14		0.724					M	10
42	-90	0.339	304	6	14			0.339	2.08978	2.13569	M	M	10
43	-15.945	0.931	305	6	15	0.931						S	10
44	-135	0.343	305	6	15		0.343					S	10
45	-90	0.303	305	6	15			0.303	2.71429	1.13201	S	S	10
46	-149.036	0.813	306	6	16	0.813						S	10
47	-71.565	0.427	306	6	16		0.427					S	10
48	-26.565	0.298	306	6	16			0.298	1.90398	1.43289	S	S	10
49	45	0.825	307	6	17	0.825						S	10
50	-45	0.346	307	6	17		0.346					S	10
51	-63.435	0.284	307	6	17			0.284	2.38439	1.21831	S	S	10
52	-135	1.184	308	6	18	1.184						T	10
53	-45	0.53	308	6	18		0.53					T	10
54	-45	0.313	308	6	18			0.313	2.23396	1.69329	T	T	10
55	53.13	0.712	309	6	19	0.712						S	10
56	153.435	0.658	309	6	19		0.658					S	10
57	-63.435	0.416	309	6	19			0.416	1.08207	1.58173	S	S	10
58	164.745	1.546	310	6	20	1.546						M	10
59	-96.34	1.171	310	6	20		1.171					M	10
60	-108.435	0.398	310	6	20			0.398	1.32024	2.94221	M	M	10
61	30.964	0.759	311	6	21	0.759						M	10
62	-63.435	0.603	311	6	21		0.603					M	10
63	-90	0.187	311	6	21			0.187	1.25871	3.2246	M	M	10
64	-9.462	0.853	312	6	22	0.853						S	10
65	75.964	0.678	312	6	22		0.678					S	10
66	-108.435	0.49	312	6	22			0.49	1.25811	1.38367	S	S	10
67	-146.31	0.545	313	6	23	0.545						S	10
68	135	0.252	313	6	23		0.252					S	10
69	-63.435	0.33	313	6	23			0.33	2.1627	0.763636	S	S	10
70	18.435	0.543	314	6	24	0.543						S	10
71	-63.435	0.379	314	6	24		0.379					S	10
72	-90	0.373	314	6	24			0.373	1.43272	1.01609	S	S	10
73	180	0.535	315	6	25	0.535						S	10
74	-116.565	0.316	315	6	25		0.316					S	10
75	-90	0.303	315	6	25			0.303	1.69304	1.0429	S	S	10
76	-158.199	0.678	316	6	26	0.678						S	10
77	-75.964	0.479	316	6	26		0.479					S	10
78	-90	0.39	316	6	26			0.39	1.41545	1.22821	S	S	10
79	-158.199	0.795	317	6	27	0.795						M	10
80	-63.435	0.596	317	6	27		0.596					M	10
81	-63.435	0.272	317	6	27			0.272	1.33389	2.19118	M	M	10
82	-140.194	1.155	318	6	28	1.155						M	10
83	-33.69	0.433	318	6	28		0.433					M	10
84	-26.565	0.23	318	6	28			0.23	2.66744	1.88261	M	M	10
85	-146.31	1.051	319	6	29	1.051						M	10
86	149.036	0.792	319	6	29		0.792					M	10
87	-71.565	0.414	319	6	29			0.414	1.32702	1.91304	M	M	10
88	36.87	0.665	320	6	30	0.665						S	10
89	-45	0.395	320	6	30		0.395					S	10
90	-26.565	0.313	320	6	30			0.313	1.68354	1.26198	S	S	10
91	-135	0.614	321	6	31	0.614						S	10
92	-45	0.825	321	6	31		0.825					S	10
93	-59.036	0.768	321	6	31			0.768	0.744242	1.07422	S	S	10
94	180	0.977	322	6	32	0.977						S	10
95	-99.462	0.872	322	6	32		0.872					S	10
96	-75.964	0.589	322	6	32			0.589	1.12041	1.48048	S	S	10
97	23.199	1.032	323	6	33	1.032						T	10
98	135	0.626	323	6	33		0.626					T	10
99	-71.565	0.406	323	6	33			0.406	1.64856	1.54187	T	T	10
100	45	0.923	324	6	34	0.923						S	10
101	135	0.578	324	6	34		0.578					S	10
102	116.565	0.354	324	6	34			0.354	1.59689	1.63277	S	S	10
103	-128.66	0.856	325	6	35	0.856						M	10
104	-38.66	0.857	325	6	35		0.857					M	10
105	-26.565	0.33	325	6	35			0.33	0.998833	2.59697	M	M	10
106	-11.31	0.675	326	6	36	0.675						S	10
107	-90	0.465	326	6	36		0.465					S	10
108	-90	0.375	326	6	36			0.375	1.45161	1.24	S	S	10
109	36.87	0.814	327	6	37	0.814						S	10
110	-18.435	0.51	327	6	37		0.51					S	10
111	-45	0.396	327	6	37			0.396	1.59608	1.28788	S	S	10
112	15.945	1.067	328	6	38	1.067						M	10
113	-45	0.477	328	6	38		0.477					M	10
114	-45	0.265	328	6	38			0.265	2.2369	1.8	M	M	10
115	-143.13	0.73	329	6	39	0.73						S	10
116	-45	0.563	329	6	39		0.563					S	10
117	-63.435	0.346	329	6	39			0.346	1.29663	1.62717	S	S	10
118	0	0.912	330	6	40	0.912						M	10
119	-90	0.93	330	6	40		0.93					M	10
120	-90	0.424	330	6	40			0.424	0.980645	2.1934	M	M	10
121	-173.66	1.342	331	6	41	1.342						M	10
122	-82.875	1.097	331	6	41		1.097					M	10
123	-90	0.419	331	6	41			0.419	1.22334	2.61814	M	M	10
124	-143.13	0.739	332	6	42	0.739						S	10
125	-45	0.429	332	6	42		0.429					S	10
126	-45	0.284	332	6	42			0.284	1.72261	1.51056	S	S	10
127	78.69	0.661	333	6	43	0.661						S	10
128	0	0.493	333	6	43		0.493					S	10
129	-14.036	0.559	333	6	43			0.559	1.34077	0.881932	S	S	10
130	-14.036	1.109	334	6	44	1.109						T	10
131	45	0.433	334	6	44		0.433					T	10
132	-71.565	0.463	334	6	44			0.463	2.5612	0.935205	T	T	10
133	-60.945	1.384	335	6	45	1.384						M	10
134	-158.199	0.743	335	6	45		0.743					M	10
135	0	0.419	335	6	45			0.419	1.86272	1.77327	M	M	10
136	130.601	1.319	336	6	46	1.319						M	10
137	30.964	0.802	336	6	46		0.802					M	10
138	180	0.444	336	6	46			0.444	1.64464	1.80631	M	M	10
139	36.87	0.814	337	6	47	0.814						S	10
140	-75.964	0.605	337	6	47		0.605					S	10
141	-56.31	0.444	337	6	47			0.444	1.34545	1.36261	S	S	10
142	36.87	0.646	338	6	48	0.646						S	10
143	90	0.442	338	6	48		0.442					S	10
144	-71.565	0.458	338	6	48			0.458	1.46154	0.965066	S	S	10
145	33.69	0.503	339	6	49	0.503						S	10
146	-45	0.447	339	6	49		0.447					S	10
147	-71.565	0.429	339	6	49			0.429	1.12528	1.04196	S	S	10
148	48.366	1.665	340	6	50	1.665						M	10
149	-59.036	0.828	340	6	50		0.828					M	10
150	-45	0.362	340	6	50			0.362	2.01087	2.28729	M	M	10
151	-156.801	0.957	341	6	51	0.957						S	10
152	-71.565	0.459	341	6	51		0.459					S	10
153	-56.31	0.568	341	6	51			0.568	2.08497	0.808099	S	S	10
154	-170.538	0.776	342	6	52	0.776						S	10
155	-71.565	0.451	342	6	52		0.451					S	10
156	-71.565	0.352	342	6	52			0.352	1.72062	1.28125	S	S	10
157	-116.565	0.581	343	6	53	0.581						S	10
158	-45	0.368	343	6	53		0.368					S	10
159	-45	0.26	343	6	53			0.26	1.5788	1.41538	S	S	10
160	39.806	1.151	344	6	54	1.151						M	10
161	-36.87	0.726	344	6	54		0.726					M	10
162	-45	0.33	344	6	54			0.33	1.5854	2.2	M	M	10
163	96.34	1.148	345	6	55	1.148						T	10
164	180	0.593	345	6	55		0.593					T	10
165	0	0.466	345	6	55			0.466	1.93592	1.27253	T	T	10
166	-153.435	0.531	346	6	56	0.531						S	10
167	-45	0.433	346	6	56		0.433					S	10
168	-45	0.379	346	6	56			0.379	1.22633	1.14248	S	S	10
169	180	1.42	347	6	57	1.42						M	10
170	-75.964	0.53	347	6	57		0.53					M	10
171	-116.565	0.302	347	6	57			0.302	2.67925	1.75497	M	M	10
172	-41.634	1.62	348	6	58	1.62						T	10
173	-135	0.396	348	6	58		0.396					T	10
174	146.31	1.025	348	6	58			1.025	4.09091	0.386341	T	T	10
175	-135	0.444	349	6	59	0.444						S	10
176	-135	0.313	349	6	59		0.313					S	10
177	-74.055	1.06	349	6	59			1.06	1.41853	0.295283	S	S	10
178	26.565	0.864	350	6	60	0.864						S	10
179	-165.964	0.514	350	6	60		0.514					S	10
180	59.036	0.853	350	6	60			0.853	1.68093	0.602579	S	S	10
181	156.801	1.062	351	6	61	1.062						T	10
182	-11.31	0.75	351	6	61		0.75					T	10
183	128.66	0.84	351	6	61			0.84	1.416	0.892857	T	T	10
184	-150.255	1.105	352	6	62	1.105						T	10
185	-165.964	0.574	352	6	62		0.574					T	10
186	123.69	0.479	352	6	62			0.479	1.92509	1.19833	T	T	10
187	30.964	0.897	353	6	63	0.897						S	10
188	36.87	0.735	353	6	63		0.735					S	10
189	-99.462	1.697	353	6	63			1.697	1.22041	0.433117	S	S	10
190	126.87	0.724	354	6	64	0.724						S	10
191	-135	0.28	354	6	64		0.28					S	10
192	90	0.562	354	6	64			0.562	2.58571	0.498221	S	S	10
193	180	0.558	355	6	65	0.558						S	10
194	26.565	0.333	355	6	65		0.333					S	10
195	167.471	1.286	355	6	65			1.286	1.67568	0.258942	S	S	10
196	-90	0.474	356	6	66	0.474						S	10
197	-90	0.356	356	6	66		0.356					S	10
198	123.69	0.535	356	6	66			0.535	1.33146	0.665421	S	S	10
199	45	0.484	357	6	67	0.484						S	10
200	-153.435	0.312	357	6	67		0.312					S	10
201	108.435	1.297	357	6	67			1.297	1.55128	0.240555	S	S	10
202	8.13	0.917	358	6	68	0.917						S	10
203	18.435	0.356	358	6	68		0.356					S	10
204	-135	0.658	358	6	68			0.658	2.57584	0.541033	S	S	10
205	153.435	0.897	359	6	69	0.897						S	10
206	-14.036	0.49	359	6	69		0.49					S	10
207	141.34	0.823	359	6	69			0.823	1.83061	0.595383	S	S	10
208	45	0.263	360	6	70	0.263						S	10
209	-116.565	0.284	360	6	70		0.284					S	10
210	-146.31	0.479	360	6	70			0.479	0.926056	0.592902	S	S	10
211	-146.31	0.479	361	6	71	0.479						S	10
212	-153.435	0.302	361	6	71		0.302					S	10
213	108.435	0.891	361	6	71			0.891	1.58609	0.338945	S	S	10
214	14.036	0.583	362	6	72	0.583						S	10
215	26.565	0.373	362	6	72		0.373					S	10
216	-59.036	0.813	362	6	72			0.813	1.563	0.458795	S	S	10
217	26.565	0.687	363	6	73	0.687						S	10
218	26.565	0.412	363	6	73		0.412					S	10
219	-129.806	1.028	363	6	73			1.028	1.66748	0.400778	S	S	10
220	-30.964	0.853	364	6	74	0.853						S	10
221	-33.69	0.531	364	6	74		0.531					S	10
222	-71.565	1.744	364	6	74			1.744	1.6064	0.304472	S	S	10
223	14.036	0.589	365	6	75	0.589						S	10
224	26.565	0.31	365	6	75		0.31					S	10
225	122.471	1.857	365	6	75			1.857	1.9	0.166936	S	S	10
226	-161.565	0.468	366	6	76	0.468						S	10
227	180	0.329	366	6	76		0.329					S	10
228	-38.66	1.781	366	6	76			1.781	1.42249	0.184728	S	S	10
229	-90	0.559	367	6	77	0.559						S	10
230	18.435	0.385	367	6	77		0.385					S	10
231	-5.711	1.326	367	6	77			1.326	1.45195	0.290347	S	S	10
232	90	0.535	368	6	78	0.535						S	10
233	-135	0.447	368	6	78		0.447					S	10
234	-63.435	0.967	368	6	78			0.967	1.19687	0.462254	S	S	10
235	45	0.593	369	6	79	0.593						S	10
236	-135	0.25	369	6	79		0.25					S	10
237	111.801	0.76	369	6	79			0.76	2.372	0.328947	S	S	10
238	-161.565	0.427	370	6	80	0.427						S	10
239	45	0.243	370	6	80		0.243					S	10
240	108.435	0.885	370	6	80			0.885	1.7572	0.274576	S	S	10
241	15.945	0.956	371	6	81	0.956						S	10
242	-165.964	0.575	371	6	81		0.575					S	10
243	-66.801	1.114	371	6	81			1.114	1.66261	0.516158	S	S	10
244	14.036	0.61	372	6	82	0.61						S	10
245	26.565	0.303	372	6	82		0.303					S	10
246	113.199	2.116	372	6	82			2.116	2.0132	0.143195	S	S	10
247	0	0.885	373	6	83	0.885						S	10
248	-153.435	0.243	373	6	83		0.243					S	10
249	-116.565	0.541	373	6	83			0.541	3.64198	0.449168	S	S	10
250	-21.801	0.739	374	6	84	0.739						S	10
251	-14.036	0.512	374	6	84		0.512					S	10
252	129.806	1.102	374	6	84			1.102	1.44336	0.46461	S	S	10
253	-143.13	0.638	375	6	85	0.638						S	10
254	-165.964	0.53	375	6	85		0.53					S	10
255	-38.66	0.879	375	6	85			0.879	1.20377	0.602958	S	S	10
256	-153.435	0.381	376	6	86	0.381						S	10
257	-135	0.379	376	6	86		0.379					S	10
258	-83.66	1.269	376	6	86			1.269	1.00528	0.29866	S	S	10
259	-165.964	0.547	377	6	87	0.547						S	10
260	0	0.283	377	6	87		0.283					S	10
261	90	0.865	377	6	87			0.865	1.93286	0.327168	S	S	10
262	14.036	0.63	378	6	88	0.63						S	10
263	-153.435	0.383	378	6	88		0.383					S	10
264	135	2.549	378	6	88			2.549	1.64491	0.150255	S	S	10
265	-140.194	1.111	379	6	89	1.111						T	10
266	-135	0.28	379	6	89		0.28					T	10
267	135	0.789	379	6	89			0.789	3.96786	0.35488	T	T	10
268	-135	0.526	380	6	90	0.526						S	10
269	-153.435	0.291	380	6	90		0.291					S	10
270	180	1.349	380	6	90			1.349	1.80756	0.215715	S	S	10
271	-78.69	0.745	381	6	91	0.745						S	10
272	-135	0.416	381	6	91		0.416					S	10
273	-56.31	0.387	381	6	91			0.387	1.79087	1.07494	S	S	10
274	-153.435	0.395	382	6	92	0.395						S	10
275	-161.565	0.339	382	6	92		0.339					S	10
276	135	0.724	382	6	92			0.724	1.16519	0.468232	S	S	10
277	26.565	0.895	383	6	93	0.895						S	10
278	-165.964	0.479	383	6	93		0.479					S	10
279	-32.005	1.26	383	6	93			1.26	1.86848	0.380159	S	S	10
280	-108.435	0.447	384	6	94	0.447						S	10
281	26.565	0.303	384	6	94		0.303					S	10
282	73.301	1.405	384	6	94			1.405	1.47525	0.215658	S	S	10
283	171.87	0.935	385	6	95	0.935						S	10
284	153.435	0.375	385	6	95		0.375					S	10
285	90	1.744	385	6	95			1.744	2.49333	0.215023	S	S	10
286	180	0.908	386	6	96	0.908						S	10
287	0	0.512	386	6	96		0.512					S	10
288	-120.964	0.865	386	6	96			0.865	1.77344	0.591908	S	S	10
289	-33.69	0.535	387	6	97	0.535						S	10
290	-26.565	0.355	387	6	97		0.355					S	10
291	-123.69	1.061	387	6	97			1.061	1.50704	0.33459	S	S	10
292	-36.87	0.563	388	6	98	0.563						S	10
293	0	0.302	388	6	98		0.302					S	10
294	38.66	0.949	388	6	98			0.949	1.86424	0.31823	S	S	10
295	-63.435	0.387	389	6	99	0.387						S	10
296	-26.565	0.291	389	6	99		0.291					S	10
297	-147.529	1.731	389	6	99			1.731	1.3299	0.168111	S	S	10
298	-56.31	0.516	390	6	100	0.516						S	10
299	-45	0.385	390	6	100		0.385					S	10
300	146.31	0.917	390	6	100			0.917	1.34026	0.419847	S	S	10
301	-135	0.61	391	6	101	0.61						S	10
302	-135	0.462	391	6	101		0.462					S	10
303	39.806	1.07	391	6	101			1.07	1.32035	0.431776	S	S	10
304	-45	0.459	392	6	102	0.459						S	10
305	-45	0.296	392	6	102		0.296					S	10
306	-168.69	0.722	392	6	102			0.722	1.55068	0.409972	S	S	10
307	-75.964	0.609	393	6	103	0.609						S	10
308	-90	0.442	393	6	103		0.442					S	10
309	90	0.791	393	6	103			0.791	1.37783	0.558786	S	S	10
310	180	0.395	394	6	104	0.395						S	10
311	180	0.302	394	6	104		0.302					S	10
312	53.13	0.691	394	6	104			0.691	1.30795	0.437048	S	S	10
313	-45	0.329	395	6	105	0.329						S	10
314	-45	0.296	395	6	105		0.296					S	10
315	-68.199	0.662	395	6	105			0.662	1.11149	0.44713	S	S	10
316	-165.964	0.63	396	6	106	0.63						S	10
317	-161.565	0.458	396	6	106		0.458					S	10
318	-41.186	1.447	396	6	106			1.447	1.37555	0.316517	S	S	10
319	-126.87	0.709	397	6	107	0.709						S	10
320	-135	0.444	397	6	107		0.444					S	10
321	153.435	0.895	397	6	107			0.895	1.59685	0.496089	S	S	10
322	-128.66	0.846	398	6	108	0.846						S	10
323	-161.565	0.51	398	6	108		0.51					S	10
324	149.036	0.851	398	6	108			0.851	1.65882	0.599295	S	S	10
325	-153.435	0.858	399	6	109	0.858						S	10
326	-165.964	0.649	399	6	109		0.649					S	10
327	138.013	1.76	399	6	109			1.76	1.32203	0.36875	S	S	10
328	63.435	0.364	400	6	110	0.364						S	10
329	180	0.302	400	6	110		0.302					S	10
330	119.745	1.24	400	6	110			1.24	1.2053	0.243548	S	S	10
331	33.69	0.489	401	6	111	0.489						S	10
332	0	0.239	401	6	111		0.239					S	10
333	135	1.054	401	6	111			1.054	2.04603	0.226755	S	S	10
334	-135	0.465	402	6	112	0.465						S	10
335	-153.435	0.355	402	6	112		0.355					S	10
336	63.435	0.638	402	6	112			0.638	1.30986	0.556426	S	S	10
337	-36.87	0.658	403	6	113	0.658						S	10
338	-26.565	0.303	403	6	113		0.303					S	10
339	-125.538	1.135	403	6	113			1.135	2.17162	0.26696	S	S	10
340	-36.87	0.678	404	6	114	0.678						S	10
341	-18.435	0.396	404	6	114		0.396					S	10
342	-9.462	0.84	404	6	114			0.84	1.71212	0.471429	S	S	10
343	90	0.28	405	6	115	0.28						S	10
344	-90	0.375	405	6	115		0.375					S	10
345	-54.462	1.221	405	6	115			1.221	0.746667	0.307125	S	S	10
346	-123.69	0.468	406	6	116	0.468						S	10
347	26.565	0.283	406	6	116		0.283					S	10
348	23.199	0.957	406	6	116			0.957	1.65371	0.295716	S	S	10
349	-45	0.419	407	6	117	0.419						S	10
350	-90	0.306	407	6	117		0.306					S	10
351	140.194	1.069	407	6	117			1.069	1.36928	0.286249	S	S	10
352	-135	0.545	408	6	118	0.545						S	10
353	-116.565	0.306	408	6	118		0.306					S	10
354	116.565	1.2	408	6	118			1.2	1.78105	0.255	S	S	10
355	23.199	1.007	409	6	119	1.007						T	10
356	-135	0.362	409	6	119		0.362					T	10
357	127.875	1.54	409	6	119			1.54	2.78177	0.235065	T	T	10
358	-143.13	0.694	410	6	120	0.694						S	10
359	-135	0.33	410	6	120		0.33					S	10
360	131.186	1.468	410	6	120			1.468	2.10303	0.224796	S	S	10
361	-135	0.774	411	6	121	0.774						S	10
362	-108.435	0.387	411	6	121		0.387					S	10
363	-164.055	1.037	411	6	121			1.037	2	0.373192	S	S	10
364	-71.565	0.421	412	6	122	0.421						S	10
365	-63.435	0.26	412	6	122		0.26					S	10
366	-150.255	1.168	412	6	122			1.168	1.61923	0.222603	S	S	10
367	-45	0.379	413	6	123	0.379						S	10
368	-63.435	0.284	413	6	123		0.284					S	10
369	161.565	0.838	413	6	123			0.838	1.33451	0.338902	S	S	10
370	-135	0.427	414	6	124	0.427						S	10
371	-90	0.233	414	6	124		0.233					S	10
372	-20.556	1.258	414	6	124			1.258	1.83262	0.185215	S	S	10
373	-101.31	0.616	415	6	125	0.616						S	10
374	-90	0.372	415	6	125		0.372					S	10
375	-164.055	1.007	415	6	125			1.007	1.65591	0.369414	S	S	10
376	-75.964	0.666	416	6	126	0.666						S	10
377	-63.435	0.329	416	6	126		0.329					S	10
378	-114.444	1.705	416	6	126			1.705	2.02432	0.192962	S	S	10
379	180	0.349	417	6	127	0.349						S	10
380	-45	0.271	417	6	127		0.271					S	10
381	165.964	1.154	417	6	127			1.154	1.28782	0.234835	S	S	10
382	56.31	0.563	418	6	128	0.563						S	10
383	-71.565	0.373	418	6	128		0.373					S	10
384	-116.565	1.811	418	6	128			1.811	1.50938	0.205964	S	S	10
385	-56.31	0.526	419	6	129	0.526						S	10
386	0	0.316	419	6	129		0.316					S	10
387	-140.194	1.151	419	6	129			1.151	1.66456	0.274544	S	S	10
388	-26.565	0.33	420	6	130	0.33						S	10
389	-63.435	0.329	420	6	130		0.329					S	10
390	0	1.465	420	6	130			1.465	1.00304	0.224573	S	S	10
391	-80.538	0.799	421	6	131	0.799						S	10
392	-116.565	0.302	421	6	131		0.302					S	10
393	-170.538	0.868	421	6	131			0.868	2.6457	0.347926	S	S	10
394	-90	0.442	422	6	132	0.442						S	10
395	-90	0.28	422	6	132		0.28					S	10
396	163.301	1.457	422	6	132			1.457	1.57857	0.192176	S	S	10
397	-126.87	0.694	423	6	133	0.694						S	10
398	-90	0.306	423	6	133		0.306					S	10
399	-6.34	1.256	423	6	133			1.256	2.26797	0.243631	S	S	10
400	-108.435	0.401	424	6	134	0.401						S	10
401	-116.565	0.31	424	6	134		0.31					S	10
402	-153.435	0.916	424	6	134			0.916	1.29355	0.338428	S	S	10
403	-56.31	0.49	425	6	135	0.49						S	10
404	-90	0.35	425	6	135		0.35					S	10
405	172.875	1.233	425	6	135			1.233	1.4	0.283861	S	S	10
406	-101.31	0.751	426	6	136	0.751						S	10
407	-90	0.349	426	6	136		0.349					S	10
408	123.69	1.509	426	6	136			1.509	2.15186	0.231279	S	S	10
409	21.801	0.77	427	6	137	0.77						S	10
410	33.69	0.427	427	6	137		0.427					S	10
411	-175.601	1.828	427	6	137			1.828	1.80328	0.233589	S	S	10
412	-90	0.352	428	6	138	0.352						S	10
413	-90	0.302	428	6	138		0.302					S	10
414	0	0.49	428	6	138			0.49	1.16556	0.616327	S	S	10
415	-90	0.535	429	6	139	0.535						S	10
416	-71.565	0.368	429	6	139		0.368					S	10
417	59.036	0.895	429	6	139			0.895	1.4538	0.411173	S	S	10
418	-56.31	0.527	430	6	140	0.527						S	10
419	0	0.221	430	6	140		0.221					S	10
420	113.199	0.968	430	6	140			0.968	2.38462	0.228306	S	S	10
421	-165.964	0.598	431	6	141	0.598						S	10
422	0	0.302	431	6	141		0.302					S	10
423	75.964	1.169	431	6	141			1.169	1.98013	0.25834	S	S	10
424	-9.462	0.885	432	6	142	0.885						S	10
425	0	0.395	432	6	142		0.395					S	10
426	60.945	1.414	432	6	142			1.414	2.24051	0.279349	S	S	10
427	-30.964	0.77	433	6	143	0.77						S	10
428	180	0.302	433	6	143		0.302					S	10
429	146.31	0.587	433	6	143			0.587	2.54967	0.51448	S	S	10
430	-116.565	0.298	434	6	144	0.298						S	10
431	-135	0.182	434	6	144		0.182					S	10
432	-98.13	0.981	434	6	144			0.981	1.63736	0.185525	S	S	10
433	0	0.638	435	6	145	0.638						S	10
434	0	0.214	435	6	145		0.214					S	10
435	141.34	0.93	435	6	145			0.93	2.98131	0.230108	S	S	10
436	-135	0.265	436	6	146	0.265						S	10
437	45	0.298	436	6	146		0.298					S	10
438	116.565	0.677	436	6	146			0.677	0.889262	0.440177	S	S	10
439	18.435	0.479	437	6	147	0.479						S	10
440	0	0.283	437	6	147		0.283					S	10
441	120.964	0.937	437	6	147			0.937	1.69258	0.302028	S	S	10
442	-161.565	0.468	438	6	148	0.468						S	10
443	180	0.237	438	6	148		0.237					S	10
444	-36.87	0.633	438	6	148			0.633	1.97468	0.374408	S	S	10
445	63.435	0.551	439	6	149	0.551						S	10
446	45	0.247	439	6	149		0.247					S	10
447	122.471	1.852	439	6	149			1.852	2.23077	0.133369	S	S	10
448	-135	0.806	440	6	150	0.806						S	10
449	26.565	0.324	440	6	150		0.324					S	10
450	-108.435	0.479	440	6	150			0.479	2.48765	0.676409	S	S	10
451	-33.69	0.433	441	6	151	0.433						S	10
452	0	0.256	441	6	151		0.256					S	10
453	98.13	0.937	441	6	151			0.937	1.69141	0.273212	S	S	10
454	180	0.558	442	6	152	0.558						S	10
455	0	0.396	442	6	152		0.396					S	10
456	75.964	0.649	442	6	152			0.649	1.40909	0.610169	S	S	10
457	-33.69	0.407	443	6	153	0.407						S	10
458	0	0.237	443	6	153		0.237					S	10
459	131.186	1.466	443	6	153			1.466	1.7173	0.161664	S	S	10
460	-146.31	0.494	444	6	154	0.494						S	10
461	45	0.168	444	6	154		0.168					S	10
462	83.66	1.365	444	6	154			1.365	2.94048	0.123077	S	S	10
463	-11.31	0.711	445	6	155	0.711						S	10
464	-26.565	0.368	445	6	155		0.368					S	10
465	-90	1.023	445	6	155			1.023	1.93207	0.359726	S	S	10
466	180	0.395	446	6	156	0.395						S	10
467	0	0.326	446	6	156		0.326					S	10
468	126.87	0.666	446	6	156			0.666	1.21166	0.489489	S	S	10
469	45	0.346	447	6	157	0.346						S	10
470	0	0.349	447	6	157		0.349					S	10
471	45	0.581	447	6	157			0.581	0.991404	0.600688	S	S	10
472	-38.66	0.856	448	6	158	0.856						S	10
473	-26.565	0.364	448	6	158		0.364					S	10
474	63.435	1.249	448	6	158			1.249	2.35165	0.291433	S	S	10
475	-30.964	0.782	449	6	159	0.782						S	10
476	161.565	0.368	449	6	159		0.368					S	10
477	-146.31	1.452	449	6	159			1.452	2.125	0.253444	S	S	10
478	-75.964	0.626	450	6	160	0.626						S	10
479	-18.435	0.375	450	6	160		0.375					S	10
480	-51.34	0.879	450	6	160			0.879	1.66933	0.426621	S	S	10
481	56.31	0.581	451	6	161	0.581						S	10
482	180	0.333	451	6	161		0.333					S	10
483	-126.87	0.658	451	6	161			0.658	1.74474	0.506079	S	S	10
484	-33.69	0.578	452	6	162	0.578						S	10
485	-45	0.381	452	6	162		0.381					S	10
486	-45	1.513	452	6	162			1.513	1.51706	0.251818	S	S	10
487	51.34	0.875	453	6	163	0.875						S	10
488	45	0.33	453	6	163		0.33					S	10
489	-150.255	1.134	453	6	163			1.134	2.65152	0.291005	S	S	10
490	-51.34	0.93	454	6	164	0.93						S	10
491	-56.31	0.523	454	6	164		0.523					S	10
492	-150.945	1.376	454	6	164			1.376	1.7782	0.380087	S	S	10
493	-45	0.56	455	6	165	0.56						S	10
494	-90	0.383	455	6	165		0.383					S	10
495	180	1.258	455	6	165			1.258	1.46214	0.304452	S	S	10
496	90	0.488	456	6	166	0.488						S	10
497	-135	0.25	456	6	166		0.25					S	10
498	-26.565	0.929	456	6	166			0.929	1.952	0.269107	S	S	10
499	-111.801	0.816	457	6	167	0.816						S	10
500	75.964	0.537	457	6	167		0.537					S	10
501	135	1.663	457	6	167			1.663	1.51955	0.32291	S	S	10
502	20.556	1.17	458	6	168	1.17						T	10
503	45	0.381	458	6	168		0.381					T	10
504	-167.471	1.291	458	6	168			1.291	3.07087	0.29512	T	T	10
505	-75.964	0.575	459	6	169	0.575						S	10
506	-90	0.257	459	6	169		0.257					S	10
507	33.69	1.004	459	6	169			1.004	2.23735	0.255976	S	S	10
508	-51.34	0.954	460	6	170	0.954						S	10
509	-45	0.265	460	6	170		0.265					S	10
510	-161.565	0.354	460	6	170			0.354	3.6	0.748588	S	S	10
511	-75.964	0.566	461	6	171	0.566						S	10
512	-71.565	0.368	461	6	171		0.368					S	10
513	54.462	1.126	461	6	171			1.126	1.53804	0.326821	S	S	10
514	-30.964	0.781	462	6	172	0.781						S	10
515	-26.565	0.343	462	6	172		0.343					S	10
516	-164.055	1.016	462	6	172			1.016	2.27697	0.337598	S	S	10
517	-78.69	0.802	463	6	173	0.802						S	10
518	-75.964	0.451	463	6	173		0.451					S	10
519	90	0.84	463	6	173			0.84	1.77827	0.536905	S	S	10
520	0	0.605	464	6	174	0.605						S	10
521	0	0.419	464	6	174		0.419					S	10
522	-39.806	1.054	464	6	174			1.054	1.44391	0.397533	S	S	10
523	56.31	0.464	465	6	175	0.464						S	10
524	-116.565	0.289	465	6	175		0.289					S	10
525	146.31	1.05	465	6	175			1.05	1.60554	0.275238	S	S	10
526	-146.31	0.645	466	6	176	0.645						S	10
527	45	0.371	466	6	176		0.371					S	10
528	-90	0.663	466	6	176			0.663	1.73854	0.559578	S	S	10
529	0	0.733	467	6	177	0.733						S	10
530	0	0.733	467	6	177		0.733					S	10
531	-141.34	0.926	467	6	177			0.926	1	0.791577	S	S	10
532	-36.87	0.742	468	6	178	0.742						S	10
533	-26.565	0.345	468	6	178		0.345					S	10
534	-18.435	0.894	468	6	178			0.894	2.15072	0.385906	S	S	10
535	-104.036	0.53	469	6	179	0.53						S	10
536	-135	0.284	469	6	179		0.284					S	10
537	-104.036	0.633	469	6	179			0.633	1.8662	0.448657	S	S	10
538	-26.565	0.574	470	6	180	0.574						S	10
539	-14.036	0.502	470	6	180		0.502					S	10
540	-153.435	0.614	470	6	180			0.614	1.14343	0.81759	S	S	10
541	-56.31	0.4	471	6	181	0.4						S	10
542	-26.565	0.26	471	6	181		0.26					S	10
543	38.66	0.846	471	6	181			0.846	1.53846	0.307329	S	S	10
544	-56.31	0.523	472	6	182	0.523						S	10
545	-63.435	0.247	472	6	182		0.247					S	10
546	54.462	1.2	472	6	182			1.2	2.11741	0.205833	S	S	10
547	-26.565	0.645	473	6	183	0.645						S	10
548	180	0.256	473	6	183		0.256					S	10
549	101.31	0.721	473	6	183			0.721	2.51953	0.355062	S	S	10
550	-165.964	0.47	474	6	184	0.47						S	10
551	0	0.306	474	6	184		0.306					S	10
552	99.462	0.807	474	6	184			0.807	1.53595	0.379182	S	S	10
553	0	0.628	475	6	185	0.628						S	10
554	180	0.512	475	6	185		0.512					S	10
555	-90	1.116	475	6	185			1.116	1.22656	0.458781	S	S	10
556	0	0.93	476	6	186	0.93						S	10
557	0	0.401	476	6	186		0.401					S	10
558	-135	0.839	476	6	186			0.839	2.3192	0.47795	S	S	10
559	-63.435	0.312	477	6	187	0.312						S	10
560	135	0.2	477	6	187		0.2					S	10
561	-90	0.589	477	6	187			0.589	1.56	0.339559	S	S	10
562	180	0.419	478	6	188	0.419						S	10
563	0	0.303	478	6	188		0.303					S	10
564	60.255	1.113	478	6	188			1.113	1.38284	0.272237	S	S	10
565	-33.69	0.542	479	6	189	0.542						S	10
566	-45	0.219	479	6	189		0.219					S	10
567	-75.964	1.128	479	6	189			1.128	2.47489	0.194149	S	S	10
568	45	0.527	480	6	190	0.527						S	10
569	0	0.256	480	6	190		0.256					S	10
570	71.565	1.663	480	6	190			1.663	2.05859	0.153939	S	S	10
571	-21.801	0.722	481	6	191	0.722						S	10
572	0	0.372	481	6	191		0.372					S	10
573	-45	0.74	481	6	191			0.74	1.94086	0.502703	S	S	10
574	56.31	0.503	482	6	192	0.503						S	10
575	63.435	0.263	482	6	192		0.263					S	10
576	129.806	1.203	482	6	192			1.203	1.91255	0.21862	S	S	10
577	-161.565	0.364	483	6	193	0.364						S	10
578	0	0.208	483	6	193		0.208					S	10
579	-104.036	1.089	483	6	193			1.089	1.75	0.191001	S	S	10
580	-21.801	0.64	484	6	194	0.64						S	10
581	0	0.442	484	6	194		0.442					S	10
582	51.34	0.93	484	6	194			0.93	1.44796	0.475269	S	S	10
583	-53.13	0.698	485	6	195	0.698						S	10
584	-26.565	0.313	485	6	195		0.313					S	10
585	130.601	1.267	485	6	195			1.267	2.23003	0.24704	S	S	10
586	-135	0.641	486	6	196	0.641						S	10
587	45	0.219	486	6	196		0.219					S	10
588	123.69	1.024	486	6	196			1.024	2.92694	0.213867	S	S	10
589	-135	0.494	487	6	197	0.494						S	10
590	-135	0.23	487	6	197		0.23					S	10
591	-57.995	1.277	487	6	197			1.277	2.14783	0.18011	S	S	10
592	33.69	1	488	6	198	1						T	10
593	45	0.387	488	6	198		0.387					T	10
594	-32.005	1.311	488	6	198			1.311	2.58398	0.295195	T	T	10
595	-116.565	0.658	489	6	199	0.658						S	10
596	45	0.265	489	6	199		0.265					S	10
597	-81.87	0.963	489	6	199			0.963	2.48302	0.275182	S	S	10
598	0	0.502	490	6	200	0.502						S	10
599	180	0.256	490	6	200		0.256					S	10
600	104.036	0.662	490	6	200			0.662	1.96094	0.386707	S	S	10
601	26.565	0.566	491	6	201	0.566						S	10
602	18.435	0.457	491	6	201		0.457					S	10
603	-53.13	0.759	491	6	201			0.759	1.23851	0.602108	S	S	10
604	33.69	0.568	492	6	202	0.568						S	10
605	45	0.379	492	6	202		0.379					S	10
606	-45	1.299	492	6	202			1.299	1.49868	0.291763	S	S	10
607	33.69	0.512	493	6	203	0.512						S	10
608	45	0.23	493	6	203		0.23					S	10
609	102.529	1.281	493	6	203			1.281	2.22609	0.179547	S	S	10
610	6.34	1.307	494	6	204	1.307						T	10
611	18.435	0.479	494	6	204		0.479					T	10
612	135	0.641	494	6	204			0.641	2.7286	0.74727	T	T	10
613	-146.31	0.429	495	6	205	0.429						S	10
614	45	0.28	495	6	205		0.28					S	10
615	-34.992	1.791	495	6	205			1.791	1.53214	0.156337	S	S	10
616	78.69	0.757	496	6	206	0.757						S	10
617	-116.565	0.281	496	6	206		0.281					S	10
618	138.814	1.42	496	6	206			1.42	2.69395	0.197887	S	S	10
619	-126.87	0.716	497	6	207	0.716						S	10
620	63.435	0.303	497	6	207		0.303					S	10
621	0	1.116	497	6	207			1.116	2.36304	0.271505	S	S	10
622	-78.69	1.4	498	6	208	1.4						T	10
623	-90	0.814	498	6	208		0.814					T	10
624	0	0.488	498	6	208			0.488	1.7199	1.66803	T	T	10
625	-90	0.401	499	6	209	0.401						S	10
626	-135	0.237	499	6	209		0.237					S	10
627	0	0.791	499	6	209			0.791	1.69198	0.299621	S	S	10
628	-90	0.489	500	6	210	0.489						S	10
629	-90	0.256	500	6	210		0.256					S	10
630	131.634	1.761	500	6	210			1.761	1.91016	0.145372	S	S	10
631	45	0.526	501	6	211	0.526						S	10
632	45	0.2	501	6	211		0.2					S	10
633	135	0.756	501	6	211			0.756	2.63	0.26455	S	S	10
634	45	0.904	502	6	212	0.904						S	10
635	56.31	0.512	502	6	212		0.512					S	10
636	161.565	0.875	502	6	212			0.875	1.76562	0.585143	S	S	10
637	-123.69	0.626	503	6	213	0.626						S	10
638	-90	0.368	503	6	213		0.368					S	10
639	11.31	0.784	503	6	213			0.784	1.70109	0.469388	S	S	10
640	-78.69	0.701	504	6	214	0.701						S	10
641	-71.565	0.316	504	6	214		0.316					S	10
642	0	0.819	504	6	214			0.819	2.21835	0.385836	S	S	10
643	-116.565	0.633	505	6	215	0.633						S	10
644	-90	0.372	505	6	215		0.372					S	10
645	-3.814	2.164	505	6	215			2.164	1.70161	0.171904	S	S	10
646	-90	0.837	506	6	216	0.837						S	10
647	-153.435	0.298	506	6	216		0.298					S	10
648	150.255	1.071	506	6	216			1.071	2.80872	0.278245	S	S	10
649	45	0.56	507	6	217	0.56						S	10
650	-116.565	0.291	507	6	217		0.291					S	10
651	141.34	0.857	507	6	217			0.857	1.9244	0.339557	S	S	10
652	-123.69	0.903	508	6	218	0.903						S	10
653	-123.69	0.549	508	6	218		0.549					S	10
654	149.036	0.942	508	6	218			0.942	1.64481	0.582803	S	S	10
655	-123.69	0.407	509	6	219	0.407						S	10
656	-116.565	0.281	509	6	219		0.281					S	10
657	-23.199	1.157	509	6	219			1.157	1.4484	0.242869	S	S	10
658	-90	0.837	510	6	220	0.837						S	10
659	90	0.303	510	6	220		0.303					S	10
660	108.435	1.323	510	6	220			1.323	2.76238	0.229025	S	S	10
661	-165.964	0.53	511	6	221	0.53						S	10
662	45	0.316	511	6	221		0.316					S	10
663	116.565	1.217	511	6	221			1.217	1.67722	0.259655	S	S	10
664	-161.565	0.525	512	6	222	0.525						S	10
665	18.435	0.354	512	6	222		0.354					S	10
666	-156.801	1.074	512	6	222			1.074	1.48305	0.329609	S	S	10
667	-75.964	0.63	513	6	223	0.63						S	10
668	116.565	0.303	513	6	223		0.303					S	10
669	-7.125	1.12	513	6	223			1.12	2.07921	0.270536	S	S	10
670	-90	0.628	514	6	224	0.628						S	10
671	-116.565	0.302	514	6	224		0.302					S	10
672	-39.806	1.238	514	6	224			1.238	2.07947	0.243942	S	S	10
673	-123.69	0.56	515	6	225	0.56						S	10
674	-116.565	0.296	515	6	225		0.296					S	10
675	-38.66	0.909	515	6	225			0.909	1.89189	0.325633	S	S	10
676	81.87	0.987	516	6	226	0.987						S	10
677	-120.964	0.813	516	6	226		0.813					S	10
678	-71.565	0.978	516	6	226			0.978	1.21402	0.831288	S	S	10
679	18.435	0.824	517	6	227	0.824						S	10
680	180	0.442	517	6	227		0.442					S	10
681	149.036	0.903	517	6	227			0.903	1.86425	0.48948	S	S	10
682	-123.69	0.53	518	6	228	0.53						S	10
683	-116.565	0.271	518	6	228		0.271					S	10
684	119.745	1.113	518	6	228			1.113	1.95572	0.243486	S	S	10
685	-135	0.427	519	6	229	0.427						S	10
686	0	0.419	519	6	229		0.419					S	10
687	-135	0.484	519	6	229			0.484	1.01909	0.865702	S	S	10
688	-45	0.549	520	6	230	0.549						S	10
689	135	0.214	520	6	230		0.214					S	10
690	-135	0.823	520	6	230			0.823	2.56542	0.260024	S	S	10
691	-45	0.56	521	6	231	0.56						S	10
692	153.435	0.272	521	6	231		0.272					S	10
693	-90	1.165	521	6	231			1.165	2.05882	0.233476	S	S	10
694	180	0.583	522	6	232	0.583						S	10
695	0	0.302	522	6	232		0.302					S	10
696	17.103	1.891	522	6	232			1.891	1.93046	0.159704	S	S	10
697	-83.66	1.33	523	6	233	1.33						T	10
698	-90	0.401	523	6	233		0.401					T	10
699	9.462	0.84	523	6	233			0.84	3.31671	0.477381	T	T	10
700	-90	0.651	524	6	234	0.651						S	10
701	-90	0.349	524	6	234		0.349					S	10
702	-135	1.021	524	6	234			1.021	1.86533	0.341822	S	S	10
703	149.036	0.81	525	6	235	0.81						S	10
704	-63.435	0.368	525	6	235		0.368					S	10
705	-135	2.123	525	6	235			2.123	2.20109	0.17334	S	S	10
706	-63.435	0.998	526	6	236	0.998						S	10
707	-63.435	0.214	526	6	236		0.214					S	10
708	53.973	1.898	526	6	236			1.898	4.66355	0.11275	S	S	10
709	-36.87	0.596	527	6	237	0.596						S	10
710	-90	0.326	527	6	237		0.326					S	10
711	135	1.184	527	6	237			1.184	1.82822	0.275338	S	S	10
712	-153.435	0.633	528	6	238	0.633						S	10
713	-116.565	0.284	528	6	238		0.284					S	10
714	23.962	1.386	528	6	238			1.386	2.22887	0.204906	S	S	10
715	-68.199	0.73	529	6	239	0.73						S	10
716	-90	0.303	529	6	239		0.303					S	10
717	180	0.721	529	6	239			0.721	2.40924	0.42025	S	S	10
718	-90	0.395	530	6	240	0.395						S	10
719	-90	0.279	530	6	240		0.279					S	10
720	153.435	1.05	530	6	240			1.05	1.41577	0.265714	S	S	10
721	-135	0.33	531	6	241	0.33						S	10
722	-90	0.302	531	6	241		0.302					S	10
723	15.255	1.607	531	6	241			1.607	1.09272	0.187928	S	S	10
724	-90	0.698	532	6	242	0.698						S	10
725	-90	0.209	532	6	242		0.209					S	10
726	66.801	1.127	532	6	242			1.127	3.33971	0.185448	S	S	10
727	-21.801	0.676	533	6	243	0.676						S	10
728	-26.565	0.272	533	6	243		0.272					S	10
729	-161.565	1.295	533	6	243			1.295	2.48529	0.210039	S	S	10
730	-51.34	0.879	534	6	244	0.879						S	10
731	-90	0.209	534	6	244		0.209					S	10
732	135	0.641	534	6	244			0.641	4.20574	0.326053	S	S	10
733	-135	0.679	535	6	245	0.679						S	10
734	56.31	0.559	535	6	245		0.559					S	10
735	101.31	0.721	535	6	245			0.721	1.21467	0.775312	S	S	10
736	0	0.628	536	6	246	0.628						S	10
737	0	0.395	536	6	246		0.395					S	10
738	141.34	0.963	536	6	246			0.963	1.58987	0.410177	S	S	10
739	-126.87	0.614	537	6	247	0.614						S	10
740	-135	0.375	537	6	247		0.375					S	10
741	174.806	1.442	537	6	247			1.442	1.63733	0.260055	S	S	10
742	-90	0.516	538	6	248	0.516						S	10
743	-108.435	0.324	538	6	248		0.324					S	10
744	168.69	0.835	538	6	248			0.835	1.59259	0.388024	S	S	10
745	-104.036	0.566	539	6	249	0.566						S	10
746	-90	0.229	539	6	249		0.229					S	10
747	-63.435	0.833	539	6	249			0.833	2.47162	0.27491	S	S	10
748	26.565	0.343	540	6	250	0.343						S	10
749	-153.435	0.271	540	6	250		0.271					S	10
750	-21.038	1.917	540	6	250			1.917	1.26568	0.141367	S	S	10
751	-123.69	0.542	541	6	251	0.542						S	10
752	-135	0.239	541	6	251		0.239					S	10
753	141.34	0.977	541	6	251			0.977	2.26778	0.244626	S	S	10
754	-123.69	0.494	542	6	252	0.494						S	10
755	-116.565	0.298	542	6	252		0.298					S	10
756	118.61	1.768	542	6	252			1.768	1.65772	0.168552	S	S	10
757	-153.435	0.335	543	6	253	0.335						S	10
758	45	0.149	543	6	253		0.149					S	10
759	123.69	1.619	543	6	253			1.619	2.24832	0.0920321	S	S	10
760	-153.435	0.603	544	6	254	0.603						S	10
761	63.435	0.281	544	6	254		0.281					S	10
762	-49.399	1.35	544	6	254			1.35	2.14591	0.208148	S	S	10
763	-126.87	0.707	545	6	255	0.707						S	10
764	-153.435	0.28	545	6	255		0.28					S	10
765	-175.914	1.893	545	6	255			1.893	2.525	0.147913	S	S	10
766	-75.964	0.56	546	6	256	0.56						S	10
767	-90	0.209	546	6	256		0.209					S	10
768	120.964	1.671	546	6	256			1.671	2.67943	0.125075	S	S	10
769	45	0.712	547	6	257	0.712						S	10
770	45	0.2	547	6	257		0.2					S	10
771	149.036	1.595	547	6	257			1.595	3.56	0.125392	S	S	10
772	56.31	0.545	548	6	258	0.545						S	10
773	45	0.149	548	6	258		0.149					S	10
774	156.038	1.457	548	6	258			1.457	3.65772	0.102265	S	S	10
775	-90	0.316	549	6	259	0.316						S	10
776	-153.435	0.265	549	6	259		0.265					S	10
777	113.962	1.429	549	6	259			1.429	1.19245	0.185444	S	S	10
778	-165.964	0.479	550	6	260	0.479						S	10
779	45	0.156	550	6	260		0.156					S	10
780	-101.31	0.655	550	6	260			0.655	3.07051	0.238168	S	S	10
781	0	0.395	551	6	261	0.395						S	10
782	18.435	0.329	551	6	261		0.329					S	10
783	21.801	0.855	551	6	261			0.855	1.20061	0.384795	S	S	10
784	-56.31	0.479	552	6	262	0.479						S	10
785	-90	0.28	552	6	262		0.28					S	10
786	-102.529	1.196	552	6	262			1.196	1.71071	0.234114	S	S	10
787	-21.801	0.782	553	6	263	0.782						S	10
788	180	0.28	553	6	263		0.28					S	10
789	120.964	0.802	553	6	263			0.802	2.79286	0.349127	S	S	10
790	-146.31	0.51	554	6	264	0.51						S	10
791	0	0.265	554	6	264		0.265					S	10
792	135	1.2	554	6	264			1.2	1.92453	0.220833	S	S	10
793	-146.31	0.444	555	6	265	0.444						S	10
794	45	0.265	555	6	265		0.265					S	10
795	174.289	1.454	555	6	265			1.454	1.67547	0.182256	S	S	10
796	-98.13	0.888	556	6	266	0.888						S	10
797	-90	0.368	556	6	266		0.368					S	10
798	45	1.628	556	6	266			1.628	2.41304	0.226044	S	S	10
799	-56.31	0.6	557	6	267	0.6						S	10
800	-45	0.265	557	6	267		0.265					S	10
801	8.13	1.05	557	6	267			1.05	2.26415	0.252381	S	S	10
802	-75.964	0.47	558	6	268	0.47						S	10
803	-90	0.35	558	6	268		0.35					S	10
804	-123.69	0.649	558	6	268			0.649	1.34286	0.539291	S	S	10
1	-165.964	1.077	559	7	1	1.077						M	10
2	-74.055	1.004	559	7	1		1.004					M	10
3	-63.435	0.303	559	7	1			0.303	1.07271	3.31353	M	M	10
4	-153.435	0.678	560	7	2	0.678						M	10
5	-56.31	0.574	560	7	2		0.574					M	10
6	-71.565	0.326	560	7	2			0.326	1.18118	1.76074	M	M	10
7	180	1.488	561	7	3	1.488						M	10
8	-90	0.721	561	7	3		0.721					M	10
9	-90	0.209	561	7	3			0.209	2.0638	3.44976	M	M	10
10	180	1.143	562	7	4	1.143						M	10
11	-90	0.93	562	7	4		0.93					M	10
12	-90	0.349	562	7	4			0.349	1.22903	2.66476	M	M	10
13	0	1.071	563	7	5	1.071						M	10
14	-90	0.372	563	7	5		0.372					M	10
15	-90	0.186	563	7	5			0.186	2.87903	2	M	M	10
16	-14.036	1.113	564	7	6	1.113						T	10
17	-90	0.398	564	7	6		0.398					T	10
18	-90	0.239	564	7	6			0.239	2.79648	1.66527	T	T	10
19	66.801	1.097	565	7	7	1.097						M	10
20	161.565	0.497	565	7	7		0.497					M	10
21	-90	0.279	565	7	7			0.279	2.20724	1.78136	M	M	10
22	139.399	1.269	566	7	8	1.269						T	10
23	45	0.742	566	7	8		0.742					T	10
24	-135	0.814	566	7	8			0.814	1.71024	0.911548	T	T	10
25	0	0.907	567	7	9	0.907						M	10
26	-90	0.768	567	7	9		0.768					M	10
27	-90	0.326	567	7	9			0.326	1.18099	2.35583	M	M	10
28	-41.987	1.914	568	7	10	1.914						M	10
29	-143.13	0.679	568	7	10		0.679					M	10
30	-116.565	0.335	568	7	10			0.335	2.81885	2.02687	M	M	10
31	36.87	0.703	569	7	11	0.703						S	10
32	-53.13	0.722	569	7	11		0.722					S	10
33	-56.31	0.471	569	7	11			0.471	0.973684	1.53291	S	S	10
34	163.301	1.471	570	7	12	1.471						M	10
35	74.055	1.037	570	7	12		1.037					M	10
36	-116.565	0.375	570	7	12			0.375	1.41851	2.76533	M	M	10
37	180	1.372	571	7	13	1.372						M	10
38	-99.462	0.849	571	7	13		0.849					M	10
39	-90	0.372	571	7	13			0.372	1.61602	2.28226	M	M	10
40	11.31	1.405	572	7	14	1.405						M	10
41	-82.875	1.168	572	7	14		1.168					M	10
42	-90	0.349	572	7	14			0.349	1.20291	3.3467	M	M	10
43	26.565	1.258	573	7	15	1.258						T	10
44	-71.565	0.831	573	7	15		0.831					T	10
45	-90	0.535	573	7	15			0.535	1.51384	1.55327	T	T	10
46	174.289	1.474	574	7	16	1.474						M	10
47	-90	0.674	574	7	16		0.674					M	10
48	-90	0.279	574	7	16			0.279	2.18694	2.41577	M	M	10
49	12.529	1.173	575	7	17	1.173						M	10
50	-90	0.651	575	7	17		0.651					M	10
51	-90	0.256	575	7	17			0.256	1.80184	2.54297	M	M	10
52	175.914	1.918	576	7	18	1.918						M	10
53	-45	0.596	576	7	18		0.596					M	10
54	-153.435	0.294	576	7	18			0.294	3.21812	2.02721	M	M	10
55	-108.435	0.882	577	7	19	0.882						M	10
56	-26.565	0.854	577	7	19		0.854					M	10
57	161.565	0.471	577	7	19			0.471	1.03279	1.81316	M	M	10
58	-135	0.792	578	7	20	0.792						S	10
59	-78.69	0.655	578	7	20		0.655					S	10
60	-56.31	0.433	578	7	20			0.433	1.20916	1.5127	S	S	10
61	158.199	0.825	579	7	21	0.825						M	10
62	-104.036	0.479	579	7	21		0.479					M	10
63	-135	0.271	579	7	21			0.271	1.72234	1.76753	M	M	10
64	149.036	0.822	580	7	22	0.822						M	10
65	-108.435	0.51	580	7	22		0.51					M	10
66	-116.565	0.294	580	7	22			0.294	1.61176	1.73469	M	M	10
67	51.34	0.93	581	7	23	0.93						S	10
68	161.565	0.439	581	7	23		0.439					S	10
69	-45	0.271	581	7	23			0.271	2.11845	1.61993	S	S	10
70	45	0.814	582	7	24	0.814						M	10
71	-45	0.592	582	7	24		0.592					M	10
72	0	0.219	582	7	24			0.219	1.375	2.7032	M	M	10
73	-26.565	1.56	583	7	25	1.56						T	10
74	-116.565	0.354	583	7	25		0.354					T	10
75	-116.565	0.361	583	7	25			0.361	4.40678	0.980609	T	T	10
76	-141.34	0.904	584	7	26	0.904						M	10
77	-33.69	0.977	584	7	26		0.977					M	10
78	-45	0.462	584	7	26			0.462	0.925281	2.11472	M	M	10
79	-8.13	1.033	585	7	27	1.033						M	10
80	-101.31	0.727	585	7	27		0.727					M	10
81	-90	0.419	585	7	27			0.419	1.42091	1.73508	M	M	10
82	-135	1.316	586	7	28	1.316						M	10
83	-38.66	0.861	586	7	28		0.861					M	10
84	-90	0.349	586	7	28			0.349	1.52846	2.46705	M	M	10
85	-126.87	0.674	587	7	29	0.674						S	10
86	-53.13	0.6	587	7	29		0.6					S	10
87	-56.31	0.523	587	7	29			0.523	1.12333	1.14723	S	S	10
88	180	1.094	588	7	30	1.094						M	10
89	-90	0.424	588	7	30		0.424					M	10
90	-63.435	0.199	588	7	30			0.199	2.58019	2.13065	M	M	10
91	-104.036	0.61	589	7	31	0.61						M	10
92	-14.036	0.515	589	7	31		0.515					M	10
93	153.435	0.271	589	7	31			0.271	1.18447	1.90037	M	M	10
94	-126.87	0.658	590	7	32	0.658						S	10
95	-56.31	0.439	590	7	32		0.439					S	10
96	-90	0.26	590	7	32			0.26	1.49886	1.68846	S	S	10
97	105.945	0.908	591	7	33	0.908						M	10
98	180	0.514	591	7	33		0.514					M	10
99	0	0.279	591	7	33			0.279	1.76654	1.84229	M	M	10
100	-119.055	1.376	592	7	34	1.376						M	10
101	-30.964	0.858	592	7	34		0.858					M	10
102	-26.565	0.291	592	7	34			0.291	1.60373	2.94845	M	M	10
103	75.964	0.61	593	7	35	0.61						S	10
104	-45	0.411	593	7	35		0.411					S	10
105	-26.565	0.252	593	7	35			0.252	1.48418	1.63095	S	S	10
106	-105.945	0.99	594	7	36	0.99						S	10
107	161.565	0.4	594	7	36		0.4					S	10
108	0	0.256	594	7	36			0.256	2.475	1.5625	S	S	10
109	-126.87	0.661	595	7	37	0.661						S	10
110	135	0.271	595	7	37		0.271					S	10
111	-26.565	0.349	595	7	37			0.349	2.43911	0.776504	S	S	10
112	-135	1.25	596	7	38	1.25						M	10
113	-45	0.74	596	7	38		0.74					M	10
114	-26.565	0.313	596	7	38			0.313	1.68919	2.36422	M	M	10
115	15.945	1.095	597	7	39	1.095						T	10
116	-90	0.401	597	7	39		0.401					T	10
117	-90	0.272	597	7	39			0.272	2.73067	1.47426	T	T	10
118	-149.036	0.871	598	7	40	0.871						M	10
119	-63.435	0.937	598	7	40		0.937					M	10
120	-45	0.375	598	7	40			0.375	0.929562	2.49867	M	M	10
121	29.745	1.093	599	7	41	1.093						M	10
122	135	0.626	599	7	41		0.626					M	10
123	-63.435	0.302	599	7	41			0.302	1.74601	2.07285	M	M	10
124	9.462	0.88	600	7	42	0.88						S	10
125	116.565	0.493	600	7	42		0.493					S	10
126	-45	0.303	600	7	42			0.303	1.78499	1.62706	S	S	10
127	26.565	0.898	601	7	43	0.898						S	10
128	101.31	0.684	601	7	43		0.684					S	10
129	-71.565	0.523	601	7	43			0.523	1.31287	1.30784	S	S	10
130	32.005	1.412	602	7	44	1.412						M	10
131	-56.31	1.038	602	7	44		1.038					M	10
132	-90	0.489	602	7	44			0.489	1.36031	2.1227	M	M	10
133	-146.31	0.49	603	7	45	0.49						S	10
134	-63.435	0.265	603	7	45		0.265					S	10
135	-63.435	0.25	603	7	45			0.25	1.84906	1.06	S	S	10
136	153.435	0.697	604	7	46	0.697						M	10
137	-123.69	0.544	604	7	46		0.544					M	10
138	-90	0.279	604	7	46			0.279	1.28125	1.94982	M	M	10
139	-158.962	1.905	605	7	47	1.905						M	10
140	-63.435	0.614	605	7	47		0.614					M	10
141	-90	0.326	605	7	47			0.326	3.10261	1.88344	M	M	10
142	-143.13	0.724	606	7	48	0.724						M	10
143	135	0.74	606	7	48		0.74					M	10
144	153.435	0.233	606	7	48			0.233	0.978378	3.17597	M	M	10
145	33.69	2.006	607	7	49	2.006						M	10
146	-90	1.14	607	7	49		1.14					M	10
147	-63.435	0.252	607	7	49			0.252	1.75965	4.52381	M	M	10
148	-6.34	1.261	608	7	50	1.261						M	10
149	-71.565	0.427	608	7	50		0.427					M	10
150	-90	0.192	608	7	50			0.192	2.95316	2.22396	M	M	10
151	123.69	1.09	609	7	51	1.09						M	10
152	26.565	0.655	609	7	51		0.655					M	10
153	26.565	0.316	609	7	51			0.316	1.66412	2.07278	M	M	10
154	-128.66	0.839	610	7	52	0.839						M	10
155	-51.34	0.926	610	7	52		0.926					M	10
156	-56.31	0.531	610	7	52			0.531	0.906048	1.74388	M	M	10
157	180	1.116	611	7	53	1.116						M	10
158	-90	0.773	611	7	53		0.773					M	10
159	-90	0.279	611	7	53			0.279	1.44373	2.77061	M	M	10
160	-170.538	0.863	612	7	54	0.863						S	10
161	-63.435	0.566	612	7	54		0.566					S	10
162	-63.435	0.368	612	7	54			0.368	1.52473	1.53804	S	S	10
163	-45	0.744	613	7	55	0.744						M	10
164	-116.565	0.395	613	7	55		0.395					M	10
165	-135	0.23	613	7	55			0.23	1.88354	1.71739	M	M	10
166	14.036	1.125	614	7	56	1.125						M	10
167	-77.471	1.241	614	7	56		1.241					M	10
168	-90	0.535	614	7	56			0.535	0.906527	2.31963	M	M	10
169	116.565	0.915	615	7	57	0.915						M	10
170	-146.31	0.555	615	7	57		0.555					M	10
171	26.565	0.26	615	7	57			0.26	1.64865	2.13462	M	M	10
172	-172.875	1.076	616	7	58	1.076						M	10
173	-90	0.535	616	7	58		0.535					M	10
174	-63.435	0.272	616	7	58			0.272	2.01121	1.96691	M	M	10
175	180	0.767	617	7	59	0.767						S	10
176	-90	0.516	617	7	59		0.516					S	10
177	-108.435	0.333	617	7	59			0.333	1.48643	1.54955	S	S	10
178	163.301	1.464	618	7	60	1.464						T	10
179	-123.69	0.544	618	7	60		0.544					T	10
180	-90	0.512	618	7	60			0.512	2.69118	1.0625	T	T	10
181	-16.699	1.377	619	7	61	1.377						M	10
182	-90	0.768	619	7	61		0.768					M	10
183	-90	0.333	619	7	61			0.333	1.79297	2.30631	M	M	10
184	90	1.14	620	7	62	1.14						M	10
185	146.31	0.52	620	7	62		0.52					M	10
186	45	0.214	620	7	62			0.214	2.19231	2.42991	M	M	10
187	116.565	0.593	621	7	63	0.593						S	10
188	-153.435	0.645	621	7	63		0.645					S	10
189	-161.565	0.406	621	7	63			0.406	0.91938	1.58867	S	S	10
190	125.538	1.163	622	7	64	1.163						M	10
191	-135	0.444	622	7	64		0.444					M	10
192	45	0.197	622	7	64			0.197	2.61937	2.25381	M	M	10
193	173.66	1.273	623	7	65	1.273						M	10
194	78.69	0.678	623	7	65		0.678					M	10
195	-90	0.303	623	7	65			0.303	1.87758	2.23762	M	M	10
196	-156.801	1.05	624	7	66	1.05						M	10
197	-56.31	0.489	624	7	66		0.489					M	10
198	-45	0.25	624	7	66			0.25	2.14724	1.956	M	M	10
199	-170.538	0.888	625	7	67	0.888						S	10
200	-75.964	0.553	625	7	67		0.553					S	10
201	-90	0.442	625	7	67			0.442	1.60579	1.25113	S	S	10
202	-36.87	0.774	626	7	68	0.774						M	10
203	63.435	0.407	626	7	68		0.407					M	10
204	-135	0.233	626	7	68			0.233	1.90172	1.74678	M	M	10
205	-63.435	0.698	627	7	69	0.698						S	10
206	-135	0.363	627	7	69		0.363					S	10
207	-153.435	0.239	627	7	69			0.239	1.92287	1.51883	S	S	10
208	-45	1.087	628	7	70	1.087						T	10
209	-135	0.23	628	7	70		0.23					T	10
210	-135	0.265	628	7	70			0.265	4.72609	0.867925	T	T	10
211	161.565	0.942	629	7	71	0.942						M	10
212	-101.31	0.739	629	7	71		0.739					M	10
213	-116.565	0.283	629	7	71			0.283	1.2747	2.61131	M	M	10
214	36.87	0.643	630	7	72	0.643						S	10
215	-33.69	0.462	630	7	72		0.462					S	10
216	-63.435	0.375	630	7	72			0.375	1.39177	1.232	S	S	10
217	142.125	1.516	631	7	73	1.516						M	10
218	-135	0.806	631	7	73		0.806					M	10
219	-123.69	0.387	631	7	73			0.387	1.88089	2.08269	M	M	10
220	171.87	1.067	632	7	74	1.067						M	10
221	-104.036	0.649	632	7	74		0.649					M	10
222	-116.565	0.316	632	7	74			0.316	1.64407	2.0538	M	M	10
223	-140.194	1.13	633	7	75	1.13						M	10
224	-45	0.712	633	7	75		0.712					M	10
225	-71.565	0.355	633	7	75			0.355	1.58708	2.00563	M	M	10
226	-145.008	1.652	634	7	76	1.652						M	10
227	-36.87	0.658	634	7	76		0.658					M	10
228	-63.435	0.355	634	7	76			0.355	2.51064	1.85352	M	M	10
229	-135	0.79	635	7	77	0.79						M	10
230	-56.31	0.527	635	7	77		0.527					M	10
231	-45	0.298	635	7	77			0.298	1.49905	1.76846	M	M	10
232	-158.199	0.762	636	7	78	0.762						S	10
233	-75.964	0.508	636	7	78		0.508					S	10
234	-71.565	0.416	636	7	78			0.416	1.5	1.22115	S	S	10
235	163.301	1.5	637	7	79	1.5						M	10
236	51.34	0.935	637	7	79		0.935					M	10
237	-90	0.349	637	7	79			0.349	1.60428	2.67908	M	M	10
238	135	0.937	638	7	80	0.937						M	10
239	-135	0.494	638	7	80		0.494					M	10
240	90	0.208	638	7	80			0.208	1.89676	2.375	M	M	10
241	-106.699	1.457	639	7	81	1.457						T	10
242	0	0.419	639	7	81		0.419					T	10
243	-26.565	0.333	639	7	81			0.333	3.47733	1.25826	T	T	10
244	-141.34	0.871	640	7	82	0.871						M	10
245	-45	0.646	640	7	82		0.646					M	10
246	-45	0.156	640	7	82			0.156	1.3483	4.14103	M	M	10
247	26.565	1.583	641	7	83	1.583						M	10
248	-63.435	0.555	641	7	83		0.555					M	10
249	-63.435	0.323	641	7	83			0.323	2.85225	1.71827	M	M	10
250	138.366	1.715	642	7	84	1.715						T	10
251	56.31	0.545	642	7	84		0.545					T	10
252	71.565	0.39	642	7	84			0.39	3.14679	1.39744	T	T	10
253	56.31	1.065	643	7	85	1.065						M	10
254	158.199	0.707	643	7	85		0.707					M	10
255	-71.565	0.406	643	7	85			0.406	1.50636	1.74138	M	M	10
256	-149.036	0.843	644	7	86	0.843						S	10
257	-56.31	0.555	644	7	86		0.555					S	10
258	-71.565	0.354	644	7	86			0.354	1.51892	1.5678	S	S	10
259	167.005	1.895	645	7	87	1.895						T	10
260	-123.69	0.471	645	7	87		0.471					T	10
261	-90	0.514	645	7	87			0.514	4.02335	0.916342	T	T	10
262	180	1.211	646	7	88	1.211						T	10
263	90	0.606	646	7	88		0.606					T	10
264	-90	0.489	646	7	88			0.489	1.99835	1.23926	T	T	10
265	-143.13	0.633	647	7	89	0.633						S	10
266	-45	0.323	647	7	89		0.323					S	10
267	-45	0.233	647	7	89			0.233	1.95975	1.38627	S	S	10
268	-164.055	1.059	648	7	90	1.059						T	10
269	-71.565	0.397	648	7	90		0.397					T	10
270	-63.435	0.381	648	7	90			0.381	2.66751	1.04199	T	T	10
271	21.801	0.648	649	7	91	0.648						M	10
272	-68.199	0.687	649	7	91		0.687					M	10
273	-90	0.356	649	7	91			0.356	0.943231	1.92978	M	M	10
274	141.34	0.942	650	7	92	0.942						S	10
275	-123.69	0.628	650	7	92		0.628					S	10
276	-123.69	0.4	650	7	92			0.4	1.5	1.57	S	S	10
277	36.87	1.451	651	7	93	1.451						T	10
278	-45	0.592	651	7	93		0.592					T	10
279	-71.565	0.424	651	7	93			0.424	2.45101	1.39623	T	T	10
280	-173.66	1.31	652	7	94	1.31						M	10
281	-90	0.488	652	7	94		0.488					M	10
282	90	0.256	652	7	94			0.256	2.68443	1.90625	M	M	10
283	170.538	0.849	653	7	95	0.849						S	10
284	-104.036	0.57	653	7	95		0.57					S	10
285	-90	0.401	653	7	95			0.401	1.48947	1.42145	S	S	10
286	135	1.102	654	7	96	1.102						T	10
287	-135	0.626	654	7	96		0.626					T	10
288	-101.31	0.727	654	7	96			0.727	1.76038	0.861073	T	T	10
289	-35.538	1.238	655	7	97	1.238						T	10
290	45	0.609	655	7	97		0.609					T	10
291	-90	0.375	655	7	97			0.375	2.03284	1.624	T	T	10
292	-153.435	0.895	656	7	98	0.895						S	10
293	-63.435	0.272	656	7	98		0.272					S	10
294	-45	0.25	656	7	98			0.25	3.29044	1.088	S	S	10
295	-131.186	1.48	657	7	99	1.48						T	10
296	153.435	0.385	657	7	99		0.385					T	10
297	-56.31	0.433	657	7	99			0.433	3.84416	0.889145	T	T	10
298	-158.199	0.73	658	7	100	0.73						M	10
299	-56.31	0.479	658	7	100		0.479					M	10
300	-63.435	0.237	658	7	100			0.237	1.52401	2.0211	M	M	10
301	-150.945	1.312	659	7	101	1.312						T	10
302	-33.69	0.462	659	7	101		0.462					T	10
303	-56.31	0.414	659	7	101			0.414	2.83983	1.11594	T	T	10
304	-147.995	1.324	660	7	102	1.324						M	10
305	123.69	0.545	660	7	102		0.545					M	10
306	153.435	0.239	660	7	102			0.239	2.42936	2.28033	M	M	10
307	180	1.046	661	7	103	1.046						M	10
308	-90	0.724	661	7	103		0.724					M	10
309	-71.565	0.421	661	7	103			0.421	1.44475	1.71971	M	M	10
310	-141.34	0.875	662	7	104	0.875						S	10
311	-45	0.379	662	7	104		0.379					S	10
312	-45	0.313	662	7	104			0.313	2.30871	1.21086	S	S	10
313	19.44	2.551	663	7	105	2.551						T	10
314	75.964	0.515	663	7	105		0.515					T	10
315	-63.435	0.355	663	7	105			0.355	4.9534	1.4507	T	T	10
316	150.945	1.488	664	7	106	1.488						T	10
317	-123.69	0.471	664	7	106		0.471					T	10
318	-90	0.465	664	7	106			0.465	3.15924	1.0129	T	T	10
319	135	1.153	665	7	107	1.153						T	10
320	-146.31	0.465	665	7	107		0.465					T	10
321	-146.31	0.484	665	7	107			0.484	2.47957	0.960744	T	T	10
322	-26.565	0.605	666	7	108	0.605						M	10
323	45	0.56	666	7	108		0.56					M	10
324	-116.565	0.323	666	7	108			0.323	1.08036	1.73375	M	M	10
[truncated: 1,029 more rows]
[truncated: 8 more columns]

## Sheet: Stat.
															type M				type S				type T
	Length		Width		Density		% M		% S		% T		% Spines		Length		Width		Length		Width		Length		Width
	Cond.1	Cond.2	Cond.1	Cond.2	Cond.1	Cond.2	Cond.1	Cond.2	Cond.1	Cond.2	Cond.1	Cond.2	Cond.1	Cond.2	Cond.1	Cond.2	Cond.1	Cond.2	Cond.1	Cond.2	Cond.1	Cond.2	Cond.1	Cond.2	Cond.1	Cond.2
Media	1.01003	1.13522	0.516545	0.643754	10.2454	7.89811	33.9161	47.8106	42.3054	28.3195	23.7785	23.8699	1	0.995786	1.16042	1.24838	0.629071	0.773861	0.722411	0.74567	0.445654	0.509842	1.33357	1.35265	0.487351	0.566569
std. Err.	0.115113	0.207169	0.0725149	0.124667	2.36947	2.21527	7.34227	18.3295	6.90217	21.2378	9.91666	9.42195	0	0.00896508	0.187639	0.15916	0.0982575	0.0912066	0.0347606	0.0834776	0.0686777	0.100451	0.0485525	0.118483	0.0850387	0.0827995
Media %	1	1.12396	1	1.24627	1	0.770895	1	1.40967	1	0.669408	1	1.00384	1	0.995786	1	1.0758	1	1.23016	1	1.0322	1	1.14403	1	1.01431	1	1.16255
std. Err. %	0.11397	0.205113	0.140384	0.241347	0.231272	0.216221	0.216483	0.540435	0.163151	0.502011	0.417043	0.396238	0	0.00896508	0.161699	0.137158	0.156195	0.144986	0.0481175	0.115554	0.154105	0.225401	0.036408	0.0888467	0.174492	0.169897
P		0.112116		0.0121133		0.0344315		0.0390884		0.0631405		0.98338		0.15447		0.27311		0.00308542		0.426612		0.112599		0.643033		0.0490584
	0.792287	1.38447	0.455205	0.817118	9.89641	4.44904	38.5965	82.3529	52.6316	5.88235	8.77193	11.7647	1	1	0.839318	1.44821	0.539076	0.855393	0.684567	0.878	0.391078	0.5345	1.23167	1.1915	0.470933	0.6905
	0.96139	1.17875	0.460595	0.609659	11.2143	8.14957	30.6818	34.7826	44.697	30.4348	24.6212	34.7826	1	1	1.02343	1.34771	0.558309	0.77175	0.708424	0.805476	0.418653	0.52281	1.34331	1.3364	0.414969	0.523563
	0.914476	1.15407	0.45983	0.688571	12.3022	8.20729	39.4558	50	46.2585	21.4286	14.2857	28.5714	1	1	1.00788	1.24614	0.543121	0.877571	0.711603	0.708	0.399206	0.390333	1.31343	1.3275	0.426095	0.5815
	0.915215	1.02807	0.396063	0.606581	8.6697	7.02018	48.1013	53.4884	43.038	23.2558	8.86076	23.2558	1	1	1.05658	1.03565	0.484921	0.663565	0.667324	0.6613	0.305647	0.5426	1.35186	1.3774	0.352857	0.5395
	1.0799	1.13648	0.566728	0.518361	9.21532	9.07914	33.3333	44.2623	40.3509	32.7869	26.3158	22.9508	1	1	1.25382	1.27707	0.714263	0.643926	0.743609	0.74225	0.487304	0.41805	1.37527	1.4285	0.501633	0.4195
	1.16287	0.697735	0.616719	0.391903	11.364	6.08654	31.25	8.58209	31.25	84.7015	37.5	6.71642	1	1	1.3086	1.152	0.6862	0.701652	0.7369	0.61052	0.5349	0.35104	1.39642	1.21717	0.627	0.511444
	1.03977	1.1166	0.537419	0.623685	10.8454	12.7232	23.2558	53.7037	46.5116	25.9259	30.2326	20.3704	1	1	1.2945	1.18187	0.6434	0.714701	0.71865	0.786095	0.50365	0.514119	1.33785	1.36515	0.507846	0.523182
	1.01329	0.971227	0.536027	0.671909	7.92438	8.58419	38.3929	52.2727	33.0357	25	28.5714	22.7273	1	1	1.05614	1.00422	0.641744	0.785478	0.707838	0.665455	0.466919	0.527	1.30888	1.2317	0.473875	0.5701
	1.07874	1.28806	0.612857	0.765468	14.6677	8.41126	25.7143	46.7742	48.5714	17.7419	25.7143	35.4839	1	0.976378	1.42233	1.30736	0.811222	0.906586	0.781882	0.778773	0.504529	0.680636	1.29589	1.51725	0.619111	0.621864
	1.14232	1.39679	0.524013	0.744284	6.35442	6.27066	30.3797	51.8868	36.7089	16.0377	32.9114	32.0755	1	0.981481	1.34158	1.48354	0.668458	0.817984	0.76331	0.820833	0.444655	0.617333	1.38112	1.53397	0.479192	0.684541
															0		0
	0	0			0	0
	0	0			0	0	0	0	0	0	0	0	0	0	0	0	0	0	0	0	0	0	0	0	0	0
	0	0			0	0
	0	0			0	0	0	0	0	0	0	0	0	0	0	0	0	0	0	0	0	0	0	0	0	0
	0	0			0	0
	0	0			0	0	0	0	0	0	0	0	0	0	0	0	0	0	0	0	0	0	0	0	0	0
	0	0			0	0
	0	0			0	0	0	0	0	0	0	0	0	0	0	0	0	0	0	0	0	0	0	0	0	0
	0	0			0	0
	0	0			0	0	0	0	0	0	0	0	0	0	0	0	0	0	0	0	0	0	0	0	0	0
	0	0			0	0
	0	0			0	0	0	0	0	0	0	0	0	0	0	0	0	0	0	0	0	0	0	0	0	0
	0	0			0	0
	0	0			0	0	0	0	0	0	0	0	0	0	0	0	0	0	0	0	0	0	0	0	0	0
	0	0			0	0
	0	0			0	0	0	0	0	0	0	0	0	0	0	0	0	0	0	0	0	0	0	0	0	0
	0	0			0	0
	0	0			0	0	0	0	0	0	0	0	0	0	0	0	0	0	0	0	0	0	0	0	0	0
	0	0			0	0
	0	0			0	0	0	0	0	0	0	0	0	0	0	0	0	0	0	0	0	0	0	0	0	0
	0	0			0	0
	0	0			0	0	0	0	0	0	0	0	0	0	0	0	0	0	0	0	0	0	0	0	0	0
	0	0			0	0
	0	0			0	0	0	0	0	0	0	0	0	0	0	0	0	0	0	0	0	0	0	0	0	0
	0	0			0	0
	0	0			0	0	0	0	0	0	0	0	0	0	0	0	0	0	0	0	0	0	0	0	0	0
	0	0			0	0
	0	0			0	0	0	0	0	0	0	0	0	0	0	0	0	0	0	0	0	0	0	0	0	0
	0	0			0	0
	0	0			0	0	0	0	0	0	0	0	0	0	0	0	0	0	0	0	0	0	0	0	0	0
	0	0			0	0
	0	0			0	0	0	0	0	0	0	0	0	0	0	0	0	0	0	0	0	0	0	0	0	0
	0	0			0	0
	0	0			0	0	0	0	0	0	0	0	0	0	0	0	0	0	0	0	0	0	0	0	0	0
	0	0			0	0
	0	0			0	0	0	0	0	0	0	0	0	0	0	0	0	0	0	0	0	0	0	0	0	0
	0	0			0	0
	0	0			0	0	0	0	0	0	0	0	0	0	0	0	0	0	0	0	0	0	0	0	0	0
	0	0			0	0
	0	0			0	0	0	0	0	0	0	0	0	0	0	0	0	0	0	0	0	0	0	0	0	0
	0	0			0	0
	0	0			0	0	0	0	0	0	0	0	0	0	0	0	0	0	0	0	0	0	0	0	0	0

## Sheet: Graph.
		LENGTH						WIDTH
	Cond.1		Cond.2				Cond.1		Cond.2
class	cumul.	cumul. %	cumul.	cumul. %		class	cumul.	cumul. %	cumul.	cumul. %
0	0	0	0	0		0	0	0	0	0
0.1	0	0	0	0		0.1	0	0	0	0
0.2	1	0.0929368	0	0		0.2	6	0.557621	9	0.891972
0.3	2	0.185874	4	0.396432		0.3	103	9.57249	94	9.31615
0.4	19	1.7658	25	2.4777		0.4	372	34.5725	238	23.5877
0.5	65	6.04089	69	6.83845		0.5	639	59.3866	395	39.1477
0.6	152	14.1264	146	14.4698		0.6	836	77.6952	590	58.4737
0.7	282	26.2082	235	23.2904		0.7	949	88.197	722	71.556
0.8	424	39.4052	315	31.219		0.8	1019	94.7026	827	81.9623
0.9	549	51.0223	428	42.4182		0.9	1047	97.3048	895	88.7017
1	660	61.3383	514	50.9415		1	1060	98.513	938	92.9633
1.1	750	69.7026	600	59.4648		1.1	1070	99.4424	968	95.9366
1.2	812	75.4647	675	66.8979		1.2	1075	99.9071	983	97.4232
1.3	877	81.5056	726	71.9524		1.3	1076	100	993	98.4143
1.4	936	86.9888	789	78.1962		1.4	1076	100	998	98.9098
1.5	977	90.7993	834	82.6561		1.5	1076	100	1002	99.3062
1.6	1004	93.3086	879	87.116		1.6	1076	100	1004	99.5045
1.7	1029	95.632	907	89.891		1.7	1076	100	1006	99.7027
1.8	1041	96.7472	929	92.0714		1.8	1076	100	1007	99.8018
1.9	1051	97.6766	945	93.6571		1.9	1076	100	1007	99.8018
2	1059	98.4201	960	95.1437		2	1076	100	1008	99.9009
2.1	1064	98.8848	968	95.9366		2.1	1076	100	1008	99.9009
2.2	1067	99.1636	978	96.9277		2.2	1076	100	1008	99.9009
2.3	1071	99.5353	988	97.9187		2.3	1076	100	1008	99.9009
2.4	1072	99.6283	994	98.5134		2.4	1076	100	1008	99.9009
2.5	1073	99.7212	996	98.7116		2.5	1076	100	1008	99.9009
2.6	1074	99.8141	998	98.9098		2.6	1076	100	1008	99.9009
2.7	1075	99.9071	1001	99.2071		2.7	1076	100	1009	100
2.8	1075	99.9071	1002	99.3062		2.8	1076	100	1009	100
2.9	1075	99.9071	1003	99.4054		2.9	1076	100	1009	100
3	1076	100	1004	99.5045		3	1076	100	1009	100
3.1	1076	100	1006	99.7027
3.2	1076	100	1007	99.8018
3.3	1076	100	1007	99.8018
3.4	1076	100	1008	99.9009
3.5	1076	100	1008	99.9009
3.6	1076	100	1009	100
3.7	1076	100	1009	100
3.8	1076	100	1009	100
3.9	1076	100	1009	100
4	1076	100	1009	100
