# Supplementary material for: Early structural and functional plasticity alterations in a susceptibility period of DYT1 dystonia mouse striatum
Source: eLife. 2018 Mar 5;7:e33331. doi: 10.7554/eLife.33331 (PMC5849413; doi:10.7554/eLife.33331)
Supplement: Figure 5—source data 2. [file elife-33331-fig5-data2.xls]

## Sheet: WT
					SPINES								DENDRITES												1.32752	0.600537	#DIV/0!			637	1.4443	0.684997			235	0.757307	0.462942			286	#DIV/0!	#DIV/0!			43	#VALUE!		#VALUE!	#VALUE!
Count	Angle	Length	Spine No. (Tot)	Neuron No.	Spine No.	Length	Width	Neck	RATIO L/W	RATIO W/N	TYPE	TYPE!	Neuron No.	Length		Length	Width	Neck	RATIO L/W	RATIO W/N			TYPE!	Neuron No.	Length	Width	Spines/10 mm	Neuron No.	TYPE!	No	Length	Width	Neuron No.	TYPE!	No	Length	Width	Neuron No.	TYPE!	No	Length	Width	Neuron No.	TYPE!		TOT	SPINES	M	S
1	-55.008	1.652	1	1	1	1.652						M	1	42.147									<>P	1	1.31305	0.595316	11.7423	1	M	55	1.34189	0.685127	1	S	16	0.74775	0.489312	1	T	24	1.62383	0.460167	1	P	2	97	95	57.8947	16.8421
2	33.69	0.749	1	1	1		0.749					M	1	12.011	Average	1.3613	0.593021	0.338578	2.53001	1.86659			TYPE!	Neuron No.				Neuron No.	TYPE!				Neuron No.	TYPE!				Neuron No.	TYPE!				Neuron No.	TYPE!
3	30.964	0.419	1	1	1			0.419	2.20561	1.78759	M	M	1	15.952	Std. Dev.	0.570881	0.226945	0.119227	1.34032	0.763966			<>P	2	1.39446	0.58391	11.972	2	M	84	1.49489	0.668167	2	S	25	0.72832	0.42064	2	T	35	1.62923	0.498314	2	P	5	149	144	58.3333	17.3611
4	-81.87	0.963	2	1	2	0.963						M	1	1.214	Std. Err.	0.0164117	0.00652421	0.00342755	0.0385314	0.0219625			TYPE!	Neuron No.				Neuron No.	TYPE!				Neuron No.	TYPE!				Neuron No.	TYPE!				Neuron No.	TYPE!
5	-7.125	0.566	2	1	2		0.566					M	1	6.903									<>P	3	1.37569	0.612912	10.5454	3	M	132	1.44388	0.706977	3	S	49	0.79798	0.552531	3	T	102	1.56496	0.520186	3	P	2	285	283	46.6431	17.3145
6	11.31	0.306	2	1	2			0.306	1.70141	1.84967	M	M	1	4.38									TYPE!	Neuron No.				Neuron No.	TYPE!				Neuron No.	TYPE!				Neuron No.	TYPE!				Neuron No.	TYPE!
7	-98.427	1.907	3	1	3	1.907						M	2	47.115									<>P	4	1.14656	0.547087	9.37339	4	M	51	1.32878	0.668039	4	S	42	0.739524	0.436976	4	T	33	1.38297	0.500303	4	P	1	127	126	40.4762	33.3333
8	-172.875	0.566	3	1	3		0.566					M	2	40.819	No of Spines	1210							TYPE!	Neuron No.				Neuron No.	TYPE!				Neuron No.	TYPE!				Neuron No.	TYPE!				Neuron No.	TYPE!
9	0	0.279	3	1	3			0.279	3.36926	2.02867	M	M	2	36.523	No of Neurons	10							<>P	5	1.41715	0.613528	9.49382	5	M	88	1.65301	0.776148	5	S	41	0.76	0.441195	5	T	51	1.53847	0.471471	5	P	3	183	180	48.8889	22.7778
10	-6.116	1.964	4	1	4	1.964						T	3	63.064	Tot. Dendrites Length	1212.56							TYPE!	Neuron No.				Neuron No.	TYPE!				Neuron No.	TYPE!				Neuron No.	TYPE!				Neuron No.	TYPE!
11	-90	0.535	4	1	4		0.535					T	3	36.753	Spines per 10 mm	9.97893							<>P	6	1.22495	0.557341	7.56863	6	M	60	1.34482	0.583417	6	S	15	0.672067	0.469	6	T	7	1.38229	0.523143	6	P	0	82	82	73.1707	18.2927
12	36.87	0.362	4	1	4			0.362	3.67103	1.4779	T	T	3	72.118									TYPE!	Neuron No.				Neuron No.	TYPE!				Neuron No.	TYPE!				Neuron No.	TYPE!				Neuron No.	TYPE!
13	133.452	1.809	5	1	5	1.809						T	3	7.367		TYPE	TYPE	TYPE	TYPE	TOT	TOT		<>P	7	1.22073	0.55951	9.02621	7	M	52	1.33921	0.657096	7	S	24	0.706042	0.428875	7	T	19	1.44186	0.49025	7	P	0	95	95	54.7368	25.2632
14	-135	0.493	5	1	5		0.493					T	3	2.24		M	S	T	P		SPINES		TYPE!	Neuron No.				Neuron No.	TYPE!				Neuron No.	TYPE!				Neuron No.	TYPE!				Neuron No.	TYPE!
15	45	0.296	5	1	5			0.296	3.66937	1.66554	T	T	3	88.717	No	637	235	295	43	1210	1167		<>P	8	1.47084	0.655667	10.3594	8	M	45	1.59162	0.762711	8	S	9	0.737444	0.454222	8	T	15	1.54853	0.4554	8	P	3	72	69	65.2174	13.0435
16	138.652	2.306	6	1	6	2.306						M	4	38.82	% TOT	0.526446	0.194215	0.243802	0.0355372	1	0.964463		TYPE!	Neuron No.				Neuron No.	TYPE!				Neuron No.	TYPE!				Neuron No.	TYPE!				Neuron No.	TYPE!
17	-164.055	0.523	6	1	6		0.523					M	4	23.048	% SPINES	0.545844	0.201371	0.252785		1			<>P	9	1.28981	0.621694	9.82571	9	M	51	1.40488	0.651392	9	S	11	0.756273	0.484	9	T	0	#DIV/0!	#DIV/0!	9	P	22	84	62	82.2581	17.7419
18	56.31	0.265	6	1	6			0.265	4.40918	1.97358	M	M	4	15.455									TYPE!	Neuron No.				Neuron No.	TYPE!				Neuron No.	TYPE!				Neuron No.	TYPE!				Neuron No.	TYPE!
19	85.236	1.659	7	1	7	1.659						T	4	7.207	Parameter								<>P	10	1.422	0.658409	9.49668	10	M	19	1.50005	0.690895	10	S	3	0.927667	0.452667	10	T	0	#DIV/0!	#DIV/0!	10	P	5	27	22	86.3636	13.6364
20	-29.745	0.542	7	1	7		0.542					T	4	32.083	RATIO W/N	1.7							TYPE!						TYPE!					TYPE!					TYPE!					TYPE!
21	-11.31	0.368	7	1	7			0.368	3.06089	1.47283	T	T	4	18.877	H P	5							<>P						M					S					T					P		#VALUE!	#VALUE!	#VALUE!	#VALUE!
22	-146.31	1.484	8	1	8	1.484						M	5	61.052	H M	3							TYPE!						TYPE!					TYPE!					TYPE!					TYPE!
23	-45	0.658	8	1	8		0.658					M	5	47.9	H S	1							<>P						M					S					T					P		#VALUE!	#VALUE!	#VALUE!	#VALUE!
24	-26.565	0.303	8	1	8			0.303	2.25532	2.17162	M	M	5	41.823									TYPE!						TYPE!					TYPE!					TYPE!					TYPE!
25	-56.31	1.284	9	1	9	1.284						T	5	9.699	#1423	neurons 1-5							<>P				#DIV/0!		M					S					T					P		#VALUE!	#VALUE!	#VALUE!	#VALUE!
26	26.565	0.572	9	1	9		0.572					T	5	5.751	#1424	neurons 6-7							TYPE!						TYPE!					TYPE!					TYPE!					TYPE!
27	0	0.349	9	1	9			0.349	2.24476	1.63897	T	T	5	26.532	#1435	neurons 8-10							<>P				#DIV/0!		M					S					T					P		#VALUE!	#VALUE!	#VALUE!	#VALUE!
28	63.435	0.656	10	1	10	0.656						M	6	29.679									TYPE!						TYPE!					TYPE!					TYPE!					TYPE!
29	-35.538	0.568	10	1	10		0.568					M	6	21.079				Neuron	NECK				<>P				#DIV/0!		M					S					T					P		#VALUE!	#VALUE!	#VALUE!	#VALUE!
30	-14.036	0.283	10	1	10			0.283	1.15493	2.00707	M	M	6	21.937									TYPE!						TYPE!					TYPE!					TYPE!					TYPE!
31	-57.265	1.187	11	1	11	1.187						M	6	35.647				1	0.335063				<>P				#DIV/0!		M					S					T					P		#VALUE!	#VALUE!	#VALUE!	#VALUE!
32	39.806	0.512	11	1	11		0.512					M	7	49.937	Length	Width	Neck						TYPE!						TYPE!					TYPE!					TYPE!					TYPE!
33	-165.964	0.257	11	1	11			0.257	2.31836	1.99222	M	M	7	24.693	1.35448	0.590092	0.336683	2	0.304861				<>P				#DIV/0!		M					S					T					P		#VALUE!	#VALUE!	#VALUE!	#VALUE!
34	-35.218	1.387	12	1	12	1.387						T	7	40.59	0.580079	0.223104	0.117645						TYPE!						TYPE!					TYPE!					TYPE!					TYPE!
35	-113.199	0.541	12	1	12		0.541					T	8	36.026	1167			3	0.36941				<>P				#DIV/0!		M					S					T					P		#VALUE!	#VALUE!	#VALUE!	#VALUE!
36	0	0.326	12	1	12			0.326	2.56377	1.65951	T	T	8	33.476									TYPE!						TYPE!					TYPE!					TYPE!					TYPE!
37	146.31	3.237	13	1	13	3.237						P	9	46.688				4	0.346944				<>P				#DIV/0!		M					S					T					P		#VALUE!	#VALUE!	#VALUE!	#VALUE!
38	-131.186	0.726	13	1	13		0.726					P	9	12.124									TYPE!						TYPE!					TYPE!					TYPE!					TYPE!
39	45	0.28	13	1	13			0.28	4.45868	2.59286	P	P	9	26.678				5	0.346922				<>P				#DIV/0!		M					S					T					P		#VALUE!	#VALUE!	#VALUE!	#VALUE!
40	-104.036	0.867	14	1	14	0.867						M	10	28.431									TYPE!						TYPE!					TYPE!					TYPE!					TYPE!
41	-23.199	0.518	14	1	14		0.518					M	10					6	0.28061				<>P				#DIV/0!		M					S					T					P		#VALUE!	#VALUE!	#VALUE!	#VALUE!
42	-18.435	0.229	14	1	14			0.229	1.67375	2.26201	M	M	10										TYPE!						TYPE!					TYPE!					TYPE!					TYPE!
43	-42.397	2.221	15	1	15	2.221						T	10					7	0.31275				<>P				#DIV/0!		M					S					T					P		#VALUE!	#VALUE!	#VALUE!	#VALUE!
44	26.565	0.281	15	1	15		0.281					T	10
45	-104.036	0.243	15	1	15			0.243	7.90391	1.15638	T	T	10					8	0.341478
46	-55.008	0.827	16	1	16	0.827						S	10
47	-149.036	0.413	16	1	16		0.413					S	10					9	0.329677
48	-165.964	0.326	16	1	16			0.326	2.00242	1.26687	S	S	10
49	-106.699	1.44	17	1	17	1.44						M	10					10	0.361727
50	-23.962	0.694	17	1	17		0.694					M	10
51	-30.964	0.401	17	1	17			0.401	2.07493	1.73067	M	M	10
52	29.745	1.663	18	1	18	1.663						M	10
53	-41.634	0.815	18	1	18		0.815					M	10
54	-63.435	0.326	18	1	18			0.326	2.04049	2.5	M	M	10
55	74.055	1.031	19	1	19	1.031						M	10
56	-14.036	0.575	19	1	19		0.575					M	10
57	180	0.262	19	1	19			0.262	1.79304	2.19466	M	M	10
58	41.186	0.753	20	1	20	0.753						S	10
59	-23.199	0.518	20	1	20		0.518					S	10
60	-26.565	0.476	20	1	20			0.476	1.45367	1.08824	S	S	10
61	60.255	1.14	21	1	21	1.14						M	10
62	-21.801	0.739	21	1	21		0.739					M	10
63	-9.462	0.386	21	1	21			0.386	1.54263	1.91451	M	M	10
64	-103.392	3.02	22	1	22	3.02						P	10
65	-153.435	0.476	22	1	22		0.476					P	10
66	-45	0.248	22	1	22			0.248	6.34454	1.91935	P	P	10
67	69.075	2.527	23	1	23	2.527						T	10
68	-21.801	0.39	23	1	23		0.39					T	10
69	-14.036	0.271	23	1	23			0.271	6.47949	1.43911	T	T	10
70	-36.027	1.877	24	1	24	1.877						T	10
71	-116.565	0.281	24	1	24		0.281					T	10
72	-123.69	0.18	24	1	24			0.18	6.67972	1.56111	T	T	10
73	-75.964	0.592	25	1	25	0.592						S	10
74	11.31	0.353	25	1	25		0.353					S	10
75	8.13	0.511	25	1	25			0.511	1.67705	0.690802	S	S	10
76	105.422	2.103	26	1	26	2.103						T	10
77	8.13	0.524	26	1	26		0.524					T	10
78	0	0.384	26	1	26			0.384	4.01336	1.36458	T	T	10
79	133.264	1.632	27	1	27	1.632						T	10
80	-146.31	0.499	27	1	27		0.499					T	10
81	21.801	0.337	27	1	27			0.337	3.27054	1.48071	T	T	10
82	-71.565	0.899	28	1	28	0.899						M	10
83	-144.462	0.61	28	1	28		0.61					M	10
84	33.69	0.257	28	1	28			0.257	1.47377	2.37354	M	M	10
85	-65.772	1.558	29	1	29	1.558						M	10
86	23.962	0.71	29	1	29		0.71					M	10
87	33.69	0.252	29	1	29			0.252	2.19437	2.81746	M	M	10
88	-124.992	2.56	30	1	30	2.56						M	10
89	180	0.785	30	1	30		0.785					M	10
90	-38.66	0.445	30	1	30			0.445	3.26115	1.76404	M	M	10
91	169.216	1.512	31	1	31	1.512						M	10
92	-95.711	0.698	31	1	31		0.698					M	10
93	-90	0.368	31	1	31			0.368	2.16619	1.89674	M	M	10
94	174.806	0.734	32	1	32	0.734						M	10
95	-99.462	0.428	32	1	32		0.428					M	10
96	-90	0.227	32	1	32			0.227	1.71495	1.88546	M	M	10
97	-153.435	0.764	33	1	33	0.764						M	10
98	-29.745	0.53	33	1	33		0.53					M	10
99	-45	0.199	33	1	33			0.199	1.44151	2.66332	M	M	10
100	-116.565	0.447	34	1	34	0.447						S	10
101	-34.992	0.842	34	1	34		0.842					S	10
102	-21.801	0.703	34	1	34			0.703	0.530879	1.19772	S	S	10
103	96.71	1.173	35	1	35	1.173						M	10
104	-146.31	0.527	35	1	35		0.527					M	10
105	-135	0.235	35	1	35			0.235	2.22581	2.24255	M	M	10
106	105.945	0.496	36	1	36	0.496						M	10
107	26.565	0.476	36	1	36		0.476					M	10
108	0	0.212	36	1	36			0.212	1.04202	2.24528	M	M	10
109	-150.255	0.554	37	1	37	0.554						S	10
110	-59.036	0.392	37	1	37		0.392					S	10
111	135	0.371	37	1	37			0.371	1.41327	1.0566	S	S	10
112	-105.945	0.999	38	1	38	0.999						M	10
113	0	0.733	38	1	38		0.733					M	10
114	-11.31	0.353	38	1	38			0.353	1.36289	2.07649	M	M	10
115	-123.69	2.056	39	1	39	2.056						T	10
116	-26.565	0.593	39	1	39		0.593					T	10
117	-30.964	0.407	39	1	39			0.407	3.46712	1.457	T	T	10
118	-104.036	2.013	40	1	40	2.013						T	10
119	0	0.331	40	1	40		0.331					T	10
120	0	0.227	40	1	40			0.227	6.08157	1.45815	T	T	10
121	-139.399	0.655	41	1	41	0.655						S	10
122	-60.255	0.532	41	1	41		0.532					S	10
123	-68.199	0.353	41	1	41			0.353	1.2312	1.50708	S	S	10
124	-173.66	1.926	42	1	42	1.926						M	10
125	-69.444	0.59	42	1	42		0.59					M	10
126	-104.036	0.276	42	1	42			0.276	3.26441	2.13768	M	M	10
127	107.745	1.809	43	1	43	1.809						M	10
128	5.194	0.77	43	1	43		0.77					M	10
129	26.565	0.266	43	1	43			0.266	2.34935	2.89474	M	M	10
130	154.983	1.17	44	1	44	1.17						T	10
131	-120.964	0.431	44	1	44		0.431					T	10
132	-153.435	0.314	44	1	44			0.314	2.71462	1.37261	T	T	10
133	-122.471	0.914	45	1	45	0.914						M	10
134	-56.31	0.46	45	1	45		0.46					M	10
135	0	0.209	45	1	45			0.209	1.98696	2.20096	M	M	10
136	147.095	1.446	46	1	46	1.446						M	10
137	66.038	0.69	46	1	46		0.69					M	10
138	-158.199	0.382	46	1	46			0.382	2.09565	1.80628	M	M	10
139	-102.095	1.016	47	1	47	1.016						T	10
140	141.34	0.447	47	1	47		0.447					T	10
141	-18.435	0.264	47	1	47			0.264	2.27293	1.69318	T	T	10
142	-78.69	1.033	48	1	48	1.033						M	10
143	-164.745	0.821	48	1	48		0.821					M	10
144	180	0.419	48	1	48			0.419	1.25822	1.95943	M	M	10
145	-39.806	1.09	49	1	49	1.09						M	10
146	-126.87	0.36	49	1	49		0.36					M	10
147	-135	0.173	49	1	49			0.173	3.02778	2.08092	M	M	10
148	-141.34	0.872	50	1	50	0.872						M	10
149	-63.435	0.718	50	1	50		0.718					M	10
150	-45	0.409	50	1	50			0.409	1.21448	1.7555	M	M	10
151	-138.013	0.95	51	1	51	0.95						S	10
152	-56.31	0.266	51	1	51		0.266					S	10
153	-53.13	0.29	51	1	51			0.29	3.57143	0.917241	S	S	10
154	162.897	0.921	52	1	52	0.921						S	10
155	-104.036	0.271	52	1	52		0.271					S	10
156	-108.435	0.254	52	1	52			0.254	3.39852	1.06693	S	S	10
157	-121.759	1.723	53	1	53	1.723						M	10
158	-23.962	0.68	53	1	53		0.68					M	10
159	-33.69	0.219	53	1	53			0.219	2.53382	3.10502	M	M	10
160	46.975	1.458	54	1	54	1.458						M	10
161	-32.905	1.466	54	1	54		1.466					M	10
162	-21.801	0.359	54	1	54			0.359	0.994543	4.08357	M	M	10
163	151.39	0.819	55	1	55	0.819						S	10
164	56.31	0.716	55	1	55		0.716					S	10
165	-116.565	0.586	55	1	55			0.586	1.14385	1.22184	S	S	10
166	119.476	1.852	56	1	56	1.852						M	10
167	-146.31	0.774	56	1	56		0.774					M	10
168	33.69	0.252	56	1	56			0.252	2.39276	3.07143	M	M	10
169	-39.472	1.545	57	1	57	1.545						T	10
170	-111.801	0.328	57	1	57		0.328					T	10
171	-116.565	0.64	57	1	57			0.64	4.71037	0.5125	T	T	10
172	109.654	0.994	58	1	58	0.994						M	10
173	26.565	0.601	58	1	58		0.601					M	10
174	14.036	0.276	58	1	58			0.276	1.65391	2.17754	M	M	10
175	-45	1.098	59	1	59	1.098						M	10
176	-139.399	0.629	59	1	59		0.629					M	10
177	-135	0.309	59	1	59			0.309	1.74563	2.0356	M	M	10
178	-68.839	2.356	60	1	60	2.356						T	10
179	33.69	0.485	60	1	60		0.485					T	10
180	-11.31	0.353	60	1	60			0.353	4.85773	1.37394	T	T	10
181	180	1.308	61	1	61	1.308						T	10
182	-90	0.366	61	1	61		0.366					T	10
183	-90	0.244	61	1	61			0.244	3.57377	1.5	T	T	10
184	23.629	1.227	62	1	62	1.227						M	10
185	-78.69	0.711	62	1	62		0.711					M	10
186	-33.69	0.235	62	1	62			0.235	1.72574	3.02553	M	M	10
187	-151.39	0.858	63	1	63	0.858						S	10
188	-71.565	0.441	63	1	63		0.441					S	10
189	-90	0.331	63	1	63			0.331	1.94558	1.33233	S	S	10
190	-35.838	1.549	64	1	64	1.549						T	10
191	-119.745	0.554	64	1	64		0.554					T	10
192	18.435	0.437	64	1	64			0.437	2.79603	1.26773	T	T	10
193	-96.71	1.236	65	1	65	1.236						M	10
194	0	0.404	65	1	65		0.404					M	10
195	45	0.199	65	1	65			0.199	3.05941	2.03015	M	M	10
196	-115.71	2.083	66	1	66	2.083						M	10
197	-45	0.496	66	1	66		0.496					M	10
198	0	0.28	66	1	66			0.28	4.1996	1.77143	M	M	10
199	-132.274	1.054	67	1	67	1.054						T	10
200	-75.964	0.237	67	1	67		0.237					T	10
201	161.565	0.199	67	1	67			0.199	4.44726	1.19095	T	T	10
202	-167.196	1.583	68	1	68	1.583						M	10
203	-58.392	1.069	68	1	68		1.069					M	10
204	-75.964	0.267	68	1	68			0.267	1.48082	4.00375	M	M	10
205	-124.509	1.359	69	1	69	1.359						M	10
206	153.435	0.431	69	1	69		0.431					M	10
207	-45	0.223	69	1	69			0.223	3.15313	1.93274	M	M	10
208	117.646	1.677	70	1	70	1.677						M	10
209	31.608	1.074	70	1	70		1.074					M	10
210	26.565	0.178	70	1	70			0.178	1.56145	6.03371	M	M	10
211	34.992	0.813	71	1	71	0.813						S	10
212	-63.435	0.314	71	1	71		0.314					S	10
213	-45	0.272	71	1	71			0.272	2.58917	1.15441	S	S	10
214	-150.255	1.113	72	1	72	1.113						M	10
215	-75.964	0.292	72	1	72		0.292					M	10
216	-45	0.15	72	1	72			0.15	3.81164	1.94667	M	M	10
217	-90	1.605	73	1	73	1.605						T	10
218	11.31	0.356	73	1	73		0.356					T	10
219	-45	0.237	73	1	73			0.237	4.50843	1.50211	T	T	10
220	-105.255	0.812	74	1	74	0.812						M	10
221	0	0.471	74	1	74		0.471					M	10
222	0	0.174	74	1	74			0.174	1.72399	2.7069	M	M	10
223	-158.962	0.992	75	1	75	0.992						M	10
224	143.13	0.659	75	1	75		0.659					M	10
225	-63.435	0.32	75	1	75			0.32	1.50531	2.05938	M	M	10
226	-35.311	2.075	76	1	76	2.075						M	10
227	78.111	1.339	76	1	76		1.339					M	10
228	-116.565	0.484	76	1	76			0.484	1.54966	2.76653	M	M	10
229	147.265	1.174	77	1	77	1.174						M	10
230	-122.005	0.606	77	1	77		0.606					M	10
231	-126.87	0.317	77	1	77			0.317	1.93729	1.91167	M	M	10
232	-40.601	0.641	78	1	78	0.641						S	10
233	-140.194	0.503	78	1	78		0.503					S	10
234	21.801	0.371	78	1	78			0.371	1.27435	1.3558	S	S	10
235	114.775	2.034	79	1	79	2.034						M	10
236	180	0.826	79	1	79		0.826					M	10
237	45	0.412	79	1	79			0.412	2.46247	2.00485	M	M	10
238	-45	0.666	80	1	80	0.666						M	10
239	45	0.682	80	1	80		0.682					M	10
240	30.964	0.4	80	1	80			0.4	0.97654	1.705	M	M	10
241	174.289	1.436	81	1	81	1.436						M	10
242	-68.199	0.75	81	1	81		0.75					M	10
243	-120.964	0.387	81	1	81			0.387	1.91467	1.93798	M	M	10
244	133.152	1.562	82	1	82	1.562						M	10
245	45	0.707	82	1	82		0.707					M	10
246	26.565	0.291	82	1	82			0.291	2.20934	2.42955	M	M	10
247	-137.726	1.003	83	1	83	1.003						M	10
248	-35.538	0.645	83	1	83		0.645					M	10
249	-45	0.333	83	1	83			0.333	1.55504	1.93694	M	M	10
250	92.726	1.444	84	1	84	1.444						M	10
251	140.194	0.487	84	1	84		0.487					M	10
252	14.036	0.27	84	1	84			0.27	2.96509	1.8037	M	M	10
253	27.646	1.622	85	1	85	1.622						M	10
254	-73.301	0.761	85	1	85		0.761					M	10
255	-45	0.274	85	1	85			0.274	2.13141	2.77737	M	M	10
256	158.199	0.762	86	1	86	0.762						S	10
257	-116.565	0.468	86	1	86		0.468					S	10
258	-108.435	0.419	86	1	86			0.419	1.62821	1.11695	S	S	10
259	180	0.953	87	1	87	0.953						S	10
260	-78.69	0.756	87	1	87		0.756					S	10
261	-90	0.523	87	1	87			0.523	1.26058	1.44551	S	S	10
262	-15.945	1.056	88	1	88	1.056						T	10
263	-90	0.342	88	1	88		0.342					T	10
264	71.565	0.229	88	1	88			0.229	3.08772	1.49345	T	T	10
265	171.573	1.861	89	1	89	1.861						M	10
266	-95.711	0.7	89	1	89		0.7					M	10
267	-78.69	0.351	89	1	89			0.351	2.65857	1.9943	M	M	10
268	26.565	0.906	90	1	90	0.906						M	10
269	-73.301	0.75	90	1	90		0.75					M	10
270	-68.199	0.408	90	1	90			0.408	1.208	1.83824	M	M	10
271	-97.595	1.099	91	1	91	1.099						T	10
272	0	0.651	91	1	91		0.651					T	10
273	9.462	0.466	91	1	91			0.466	1.68817	1.397	T	T	10
274	74.745	1.575	92	1	92	1.575						M	10
275	-32.005	1.316	92	1	92		1.316					M	10
276	0	0.535	92	1	92			0.535	1.19681	2.45981	M	M	10
277	37.875	1.558	93	1	93	1.558						T	10
278	-56.31	0.523	93	1	93		0.523					T	10
279	126.87	0.329	93	1	93			0.329	2.97897	1.58967	T	T	10
280	-10.62	1.158	94	1	94	1.158						M	10
281	-102.095	0.967	94	1	94		0.967					M	10
282	71.565	0.441	94	1	94			0.441	1.19752	2.19274	M	M	10
283	130.601	0.61	95	1	95	0.61						S	10
284	-146.31	0.51	95	1	95		0.51					S	10
285	29.745	0.555	95	1	95			0.555	1.19608	0.918919	S	S	10
286	145.008	0.809	96	1	96	0.809						S	10
287	-129.806	0.534	96	1	96		0.534					S	10
288	21.801	0.382	96	1	96			0.382	1.51498	1.39791	S	S	10
289	137.49	1.124	97	1	97	1.124						T	10
290	60.945	0.742	97	1	97		0.742					T	10
291	-141.34	0.904	97	1	97			0.904	1.51482	0.820796	T	T	10
1	147.171	2.534	98	2	1	2.534						T	10
2	-104.036	0.818	98	2	1		0.818					T	10
3	-141.34	0.494	98	2	1			0.494	3.0978	1.65587	T	T	10
4	144.638	2.679	99	2	2	2.679						T	10
5	29.745	0.562	99	2	2		0.562					T	10
6	-98.13	0.52	99	2	2			0.52	4.7669	1.08077	T	T	10
7	137.726	1.024	100	2	3	1.024						M	10
8	-140.194	0.479	100	2	3		0.479					M	10
9	-90	0.237	100	2	3			0.237	2.13779	2.0211	M	M	10
10	-37.569	2.339	101	2	4	2.339						M	10
11	41.186	0.757	101	2	4		0.757					M	10
12	-123.69	0.303	101	2	4			0.303	3.08983	2.49835	M	M	10
13	150.255	1.717	102	2	5	1.717						T	10
14	56.31	0.499	102	2	5		0.499					T	10
15	38.66	0.429	102	2	5			0.429	3.44088	1.16317	T	T	10
16	-51.34	1.373	103	2	6	1.373						T	10
17	-26.565	0.614	103	2	6		0.614					T	10
18	51.34	0.414	103	2	6			0.414	2.23616	1.48309	T	T	10
19	-15.524	1.246	104	2	7	1.246						M	10
20	-118.61	0.885	104	2	7		0.885					M	10
21	-105.945	0.479	104	2	7			0.479	1.40791	1.8476	M	M	10
22	133.091	2.927	105	2	8	2.927						T	10
23	51.34	0.419	105	2	8		0.419					T	10
24	-153.435	0.427	105	2	8			0.427	6.98568	0.981265	T	T	10
25	171.87	1.013	106	2	9	1.013						T	10
26	-90	1.325	106	2	9		1.325					T	10
27	-97.595	1.027	106	2	9			1.027	0.764528	1.29017	T	T	10
28	-30.069	1.509	107	2	10	1.509						M	10
29	-95.711	0.724	107	2	10		0.724					M	10
30	21.801	0.375	107	2	10			0.375	2.08425	1.93067	M	M	10
31	145.713	1.844	108	2	11	1.844						M	10
32	74.055	0.544	108	2	11		0.544					M	10
33	-108.435	0.229	108	2	11			0.229	3.38971	2.37555	M	M	10
34	-39.094	1.42	109	2	12	1.42						M	10
35	-128.66	0.447	109	2	12		0.447					M	10
36	56.31	0.233	109	2	12			0.233	3.17673	1.91845	M	M	10
37	174.289	0.701	110	2	13	0.701						M	10
38	-97.125	0.585	110	2	13		0.585					M	10
39	-90	0.306	110	2	13			0.306	1.19829	1.91176	M	M	10
40	153.435	0.77	111	2	14	0.77						M	10
41	78.69	0.689	111	2	14		0.689					M	10
42	-111.801	0.368	111	2	14			0.368	1.11756	1.87228	M	M	10
43	135	1.776	112	2	15	1.776						M	10
44	55.008	0.884	112	2	15		0.884					M	10
45	-135	0.182	112	2	15			0.182	2.00905	4.85714	M	M	10
46	133.452	1.86	113	2	16	1.86						T	10
47	51.34	0.451	113	2	16		0.451					T	10
48	63.435	0.271	113	2	16			0.271	4.12417	1.66421	T	T	10
49	-51.52	3.457	114	2	17	3.457						P	10
50	21.801	0.395	114	2	17		0.395					P	10
51	51.34	0.465	114	2	17			0.465	8.7519	0.849462	P	P	10
52	127.569	3.451	115	2	18	3.451						P	10
53	54.462	0.596	115	2	18		0.596					P	10
54	30.964	0.343	115	2	18			0.343	5.79027	1.73761	P	P	10
55	-143.973	0.935	116	2	19	0.935						S	10
56	-59.036	0.419	116	2	19		0.419					S	10
57	-74.055	0.474	116	2	19			0.474	2.2315	0.883966	S	S	10
58	15.945	1.479	117	2	20	1.479						M	10
59	-70.017	0.824	117	2	20		0.824					M	10
60	-63.435	0.323	117	2	20			0.323	1.7949	2.55108	M	M	10
61	53.13	1	118	2	21	1						M	10
62	163.301	0.684	118	2	21		0.684					M	10
63	116.565	0.2	118	2	21			0.2	1.46199	3.42	M	M	10
64	14.036	1.703	119	2	22	1.703						M	10
65	-56.31	1.268	119	2	22		1.268					M	10
66	90	0.326	119	2	22			0.326	1.34306	3.88957	M	M	10
67	-76.608	1.541	120	2	23	1.541						T	10
68	-45	0.313	120	2	23		0.313					T	10
69	-123.69	0.271	120	2	23			0.271	4.92332	1.15498	T	T	10
70	-177.274	1.465	121	2	24	1.465						M	10
71	-90	0.674	121	2	24		0.674					M	10
72	90	0.256	121	2	24			0.256	2.17359	2.63281	M	M	10
73	-65.376	1.82	122	2	25	1.82						T	10
74	18.435	0.412	122	2	25		0.412					T	10
75	36.87	0.335	122	2	25			0.335	4.41748	1.22985	T	T	10
76	-3.366	2.373	123	2	26	2.373						M	10
77	-84.289	0.699	123	2	26		0.699					M	10
78	90	0.302	123	2	26			0.302	3.39485	2.31457	M	M	10
79	-176.634	1.192	124	2	27	1.192						T	10
80	108.435	0.471	124	2	27		0.471					T	10
81	-90	0.279	124	2	27			0.279	2.53079	1.68817	T	T	10
82	171.119	2.259	125	2	28	2.259						M	10
83	-80.538	0.819	125	2	28		0.819					M	10
84	-101.31	0.39	125	2	28			0.39	2.75824	2.1	M	M	10
85	105.422	2.105	126	2	29	2.105						M	10
86	-9.462	0.424	126	2	29		0.424					M	10
87	63.435	0.182	126	2	29			0.182	4.96462	2.32967	M	M	10
88	141.34	2.745	127	2	30	2.745						M	10
89	0	0.93	127	2	30		0.93					M	10
90	71.565	0.419	127	2	30			0.419	2.95161	2.21957	M	M	10
91	-137.726	1.036	128	2	31	1.036						M	10
92	-52.125	0.795	128	2	31		0.795					M	10
93	-68.199	0.324	128	2	31			0.324	1.30314	2.4537	M	M	10
94	-27.897	1.332	129	2	32	1.332						M	10
95	-96.009	1.338	129	2	32		1.338					M	10
96	60.255	0.542	129	2	32			0.542	0.995516	2.46863	M	M	10
97	113.499	1.78	130	2	33	1.78						M	10
98	10.305	0.734	130	2	33		0.734					M	10
99	36.87	0.349	130	2	33			0.349	2.42507	2.10315	M	M	10
100	60.945	1.44	131	2	34	1.44						T	10
101	-49.399	0.676	131	2	34		0.676					T	10
102	161.565	0.406	131	2	34			0.406	2.13018	1.66502	T	T	10
103	47.726	1.07	132	2	35	1.07						M	10
104	-66.801	0.553	132	2	35		0.553					M	10
105	-26.565	0.323	132	2	35			0.323	1.9349	1.71207	M	M	10
106	146.31	1.071	133	2	36	1.071						M	10
107	51.34	0.916	133	2	36		0.916					M	10
108	68.199	0.419	133	2	36			0.419	1.16921	2.18616	M	M	10
109	140.711	0.981	134	2	37	0.981						S	10
110	-111.801	0.354	134	2	37		0.354					S	10
111	63.435	0.427	134	2	37			0.427	2.77119	0.82904	S	S	10
112	180	0.744	135	2	38	0.744						S	10
113	-90	0.558	135	2	38		0.558					S	10
114	90	0.372	135	2	38			0.372	1.33333	1.5	S	S	10
115	-111.801	1.52	136	2	39	1.52						T	10
116	-56.31	0.735	136	2	39		0.735					T	10
117	0	0.466	136	2	39			0.466	2.06803	1.57725	T	T	10
118	-167.735	1.655	137	2	40	1.655						T	10
119	-90	0.581	137	2	40		0.581					T	10
120	90	0.395	137	2	40			0.395	2.84854	1.47089	T	T	10
121	150.255	1.719	138	2	41	1.719						M	10
122	45	0.921	138	2	41		0.921					M	10
123	-111.801	0.324	138	2	41			0.324	1.86645	2.84259	M	M	10
124	-151.928	1.168	139	2	42	1.168						T	10
125	-33.69	0.503	139	2	42		0.503					T	10
126	-68.199	0.368	139	2	42			0.368	2.32207	1.36685	T	T	10
127	-15.068	1.878	140	2	43	1.878						T	10
128	90	0.326	140	2	43		0.326					T	10
129	-90	0.279	140	2	43			0.279	5.76074	1.16846	T	T	10
130	173.66	0.655	141	2	44	0.655						S	10
131	-108.435	0.427	141	2	44		0.427					S	10
132	-104.036	0.316	141	2	44			0.316	1.53396	1.35127	S	S	10
133	-105.255	0.773	142	2	45	0.773						S	10
134	-18.435	0.437	142	2	45		0.437					S	10
135	0	0.349	142	2	45			0.349	1.76888	1.25215	S	S	10
136	38.157	1.256	143	2	46	1.256						T	10
137	-56.31	0.503	143	2	46		0.503					T	10
138	-59.036	0.427	143	2	46			0.427	2.49702	1.17799	T	T	10
139	180	0.651	144	2	47	0.651						S	10
140	-86.186	1.071	144	2	47		1.071					S	10
141	-90	0.791	144	2	47			0.791	0.607843	1.35398	S	S	10
142	-163.301	1.45	145	2	48	1.45						M	10
143	-63.435	0.759	145	2	48		0.759					M	10
144	-99.462	0.401	145	2	48			0.401	1.91041	1.89277	M	M	10
145	158.199	1.481	146	2	49	1.481						M	10
146	-90	0.349	146	2	49		0.349					M	10
147	63.435	0.119	146	2	49			0.119	4.24355	2.93277	M	M	10
148	139.764	1.17	147	2	50	1.17						T	10
149	49.399	0.674	147	2	50		0.674					T	10
150	59.036	0.4	147	2	50			0.4	1.73591	1.685	T	T	10
151	48.013	1.861	148	2	51	1.861						M	10
152	180	0.651	148	2	51		0.651					M	10
153	135	0.28	148	2	51			0.28	2.85868	2.325	M	M	10
154	132.709	1.234	149	2	52	1.234						T	10
155	15.945	0.525	149	2	52		0.525					T	10
156	-90	0.396	149	2	52			0.396	2.35048	1.32576	T	T	10
157	7.765	1.526	150	2	53	1.526						M	10
158	-90	0.653	150	2	53		0.653					M	10
159	-90	0.349	150	2	53			0.349	2.33691	1.87106	M	M	10
160	31.608	1.038	151	2	54	1.038						T	10
161	-63.435	0.583	151	2	54		0.583					T	10
162	-59.036	0.395	151	2	54			0.395	1.78045	1.47595	T	T	10
163	45	1.332	152	2	55	1.332						T	10
164	0	0.326	152	2	55		0.326					T	10
165	108.435	0.199	152	2	55			0.199	4.08589	1.63819	T	T	10
166	47.49	1.118	153	2	56	1.118						T	10
167	-36.87	0.313	153	2	56		0.313					T	10
168	-33.69	0.252	153	2	56			0.252	3.57188	1.24206	T	T	10
169	-19.983	1.633	154	2	57	1.633						M	10
170	42.51	1.118	154	2	57		1.118					M	10
171	90	0.488	154	2	57			0.488	1.46064	2.29098	M	M	10
172	-57.653	2.425	155	2	58	2.425						T	10
173	30.964	0.387	155	2	58		0.387					T	10
174	59.036	0.419	155	2	58			0.419	6.26615	0.923628	T	T	10
175	-165.379	1.67	156	2	59	1.67						M	10
176	-90	1.023	156	2	59		1.023					M	10
177	78.69	0.356	156	2	59			0.356	1.63245	2.8736	M	M	10
178	164.745	0.767	157	2	60	0.767						S	10
179	-90	0.582	157	2	60		0.582					S	10
180	-90	0.395	157	2	60			0.395	1.31787	1.47342	S	S	10
181	156.038	0.687	158	2	61	0.687						S	10
182	53.13	0.346	158	2	61		0.346					S	10
183	-135	0.247	158	2	61			0.247	1.98555	1.40081	S	S	10
184	-36.87	1.057	159	2	62	1.057						M	10
185	53.13	0.665	159	2	62		0.665					M	10
186	45	0.2	159	2	62			0.2	1.58947	3.325	M	M	10
187	-146.31	0.968	160	2	63	0.968						M	10
188	105.945	0.515	160	2	63		0.515					M	10
189	-45	0.214	160	2	63			0.214	1.87961	2.40654	M	M	10
190	-10.305	1.579	161	2	64	1.579						M	10
191	85.914	0.977	161	2	64		0.977					M	10
192	90	0.419	161	2	64			0.419	1.61617	2.33174	M	M	10
193	109.983	2.487	162	2	65	2.487						M	10
194	23.199	0.544	162	2	65		0.544					M	10
195	0	0.209	162	2	65			0.209	4.57169	2.60287	M	M	10
196	-164.055	1.581	163	2	66	1.581						T	10
197	-78.69	0.361	163	2	66		0.361					T	10
198	116.565	0.302	163	2	66			0.302	4.3795	1.19536	T	T	10
199	28.61	0.905	164	2	67	0.905						S	10
200	-63.435	0.449	164	2	67		0.449					S	10
201	-75.964	0.316	164	2	67			0.316	2.01559	1.42089	S	S	10
202	40.601	0.676	165	2	68	0.676						M	10
203	-51.34	0.479	165	2	68		0.479					M	10
204	-45	0.233	165	2	68			0.233	1.41127	2.05579	M	M	10
205	66.501	1.749	166	2	69	1.749						M	10
206	172.875	0.593	166	2	69		0.593					M	10
207	158.199	0.333	166	2	69			0.333	2.94941	1.78078	M	M	10
208	131.424	1.547	167	2	70	1.547						M	10
209	26.565	0.499	167	2	70		0.499					M	10
210	-135	0.247	167	2	70			0.247	3.1002	2.02024	M	M	10
211	113.199	1.619	168	2	71	1.619						T	10
212	38.66	0.411	168	2	71		0.411					T	10
213	-36.87	0.284	168	2	71			0.284	3.93917	1.44718	T	T	10
214	161.565	0.649	169	2	72	0.649						S	10
215	-90	0.395	169	2	72		0.395					S	10
216	-90	0.302	169	2	72			0.302	1.64304	1.30795	S	S	10
217	151.39	0.845	170	2	73	0.845						S	10
218	-111.801	0.376	170	2	73		0.376					S	10
219	90	0.352	170	2	73			0.352	2.24734	1.06818	S	S	10
220	-21.251	1.383	171	2	74	1.383						T	10
221	-99.462	0.398	171	2	74		0.398					T	10
222	75.964	0.25	171	2	74			0.25	3.47487	1.592	T	T	10
223	49.399	0.628	172	2	75	0.628						M	10
224	-45	0.493	172	2	75		0.493					M	10
225	123.69	0.26	172	2	75			0.26	1.27383	1.89615	M	M	10
226	56.31	0.974	173	2	76	0.974						M	10
227	-36.87	0.303	173	2	76		0.303					M	10
228	0	0.116	173	2	76			0.116	3.21452	2.61207	M	M	10
229	180	0.814	174	2	77	0.814						S	10
230	90	0.279	174	2	77		0.279					S	10
231	90	0.186	174	2	77			0.186	2.91756	1.5	S	S	10
232	-12.529	0.684	175	2	78	0.684						S	10
233	-90	0.256	175	2	78		0.256					S	10
234	-90	0.186	175	2	78			0.186	2.67188	1.37634	S	S	10
235	180	0.837	176	2	79	0.837						S	10
236	90	0.302	176	2	79		0.302					S	10
237	-90	0.186	176	2	79			0.186	2.77152	1.62366	S	S	10
238	-156.801	0.499	177	2	80	0.499						S	10
239	-26.565	0.164	177	2	80		0.164					S	10
240	116.565	0.187	177	2	80			0.187	3.04268	0.877005	S	S	10
241	128.66	0.846	178	2	81	0.846						S	10
242	-146.31	0.247	178	2	81		0.247					S	10
243	90	0.147	178	2	81			0.147	3.4251	1.68027	S	S	10
244	-165.964	0.88	179	2	82	0.88						M	10
245	-82.875	0.612	179	2	82		0.612					M	10
246	90	0.116	179	2	82			0.116	1.43791	5.27586	M	M	10
247	180	1.21	180	2	83	1.21						M	10
248	-90	0.326	180	2	83		0.326					M	10
249	-90	0.14	180	2	83			0.14	3.71166	2.32857	M	M	10
250	-41.82	1.778	181	2	84	1.778						M	10
251	63.435	1.072	181	2	84		1.072					M	10
252	45	0.247	181	2	84			0.247	1.65858	4.34008	M	M	10
253	175.601	0.93	182	2	85	0.93						S	10
254	-82.875	0.56	182	2	85		0.56					S	10
255	66.801	0.479	182	2	85			0.479	1.66071	1.1691	S	S	10
256	180	1.744	183	2	86	1.744						M	10
257	-69.444	0.64	183	2	86		0.64					M	10
258	-90	0.233	183	2	86			0.233	2.725	2.74678	M	M	10
259	155.556	1.664	184	2	87	1.664						M	10
260	38.66	0.444	184	2	87		0.444					M	10
261	90	0.163	184	2	87			0.163	3.74775	2.72393	M	M	10
262	14.744	1.314	185	2	88	1.314						M	10
263	-68.199	0.765	185	2	88		0.765					M	10
264	75.964	0.265	185	2	88			0.265	1.71765	2.88679	M	M	10
265	169.992	1.197	186	2	89	1.197						M	10
266	86.424	1.097	186	2	89		1.097					M	10
267	-90	0.372	186	2	89			0.372	1.09116	2.94892	M	M	10
268	139.399	1.253	187	2	90	1.253						T	10
269	51.34	0.414	187	2	90		0.414					T	10
270	-116.565	0.302	187	2	90			0.302	3.02657	1.37086	T	T	10
271	150.945	0.749	188	2	91	0.749						M	10
272	39.806	0.543	188	2	91		0.543					M	10
273	-123.69	0.229	188	2	91			0.229	1.37937	2.37118	M	M	10
274	150.255	1.157	189	2	92	1.157						T	10
275	-128.66	0.381	189	2	92		0.381					T	10
276	56.31	0.271	189	2	92			0.271	3.03675	1.4059	T	T	10
277	32.471	0.922	190	2	93	0.922						S	10
278	110.556	0.614	190	2	93		0.614					S	10
279	-59.036	0.385	190	2	93			0.385	1.50163	1.59481	S	S	10
280	140.711	0.989	191	2	94	0.989						M	10
281	61.39	0.854	191	2	94		0.854					M	10
282	-126.87	0.387	191	2	94			0.387	1.15808	2.20672	M	M	10
283	94.086	1.958	192	2	95	1.958						M	10
284	180	0.605	192	2	95		0.605					M	10
285	33.69	0.281	192	2	95			0.281	3.23636	2.15302	M	M	10
286	126.87	1.428	193	2	96	1.428						T	10
287	45	0.477	193	2	96		0.477					T	10
288	-149.036	0.419	193	2	96			0.419	2.99371	1.13842	T	T	10
289	-46.637	1.743	194	2	97	1.743						M	10
290	32.005	0.646	194	2	97		0.646					M	10
291	75.964	0.288	194	2	97			0.288	2.69814	2.24306	M	M	10
292	-168.69	1.373	195	2	98	1.373						M	10
293	-90	1.139	195	2	98		1.139					M	10
294	90	0.372	195	2	98			0.372	1.20544	3.06183	M	M	10
295	137.862	1.958	196	2	99	1.958						T	10
296	-135	0.641	196	2	99		0.641					T	10
297	26.565	0.468	196	2	99			0.468	3.0546	1.36966	T	T	10
298	138.814	0.726	197	2	100	0.726						M	10
299	59.036	0.381	197	2	100		0.381					M	10
300	63.435	0.149	197	2	100			0.149	1.90551	2.55705	M	M	10
301	-171.027	1.296	198	2	101	1.296						M	10
302	-78.69	0.356	198	2	101		0.356					M	10
303	-71.565	0.164	198	2	101			0.164	3.64045	2.17073	M	M	10
304	173.66	0.632	199	2	102	0.632						S	10
305	-99.462	0.429	199	2	102		0.429					S	10
306	75.964	0.31	199	2	102			0.31	1.47319	1.38387	S	S	10
307	-55.305	1.05	200	2	103	1.05						M	10
308	37.875	0.831	200	2	103		0.831					M	10
309	38.66	0.447	200	2	103			0.447	1.26354	1.85906	M	M	10
310	161.565	1.263	201	2	104	1.263						M	10
311	-135	0.371	201	2	104		0.371					M	10
312	63.435	0.141	201	2	104			0.141	3.40431	2.63121	M	M	10
313	-45	0.37	202	2	105	0.37						S	10
314	45	0.371	202	2	105		0.371					S	10
315	45	0.297	202	2	105			0.297	0.997305	1.24916	S	S	10
316	-19.44	3.789	203	2	106	3.789						P	10
317	-80.538	0.465	203	2	106		0.465					P	10
318	56.31	0.266	203	2	106			0.266	8.14839	1.74812	P	P	10
319	97.595	1.058	204	2	107	1.058						M	10
320	-29.745	0.585	204	2	107		0.585					M	10
321	18.435	0.213	204	2	107			0.213	1.80855	2.74648	M	M	10
322	130.236	1.211	205	2	108	1.211						M	10
323	50.194	0.583	205	2	108		0.583					M	10
324	26.565	0.305	205	2	108			0.305	2.07719	1.91148	M	M	10
325	-29.745	2.25	206	2	109	2.25						M	10
326	53.13	0.353	206	2	109		0.353					M	10
327	-116.565	0.172	206	2	109			0.172	6.37394	2.05233	M	M	10
328	-39.806	0.543	207	2	110	0.543						S	10
329	-135	0.371	207	2	110		0.371					S	10
330	45	0.432	207	2	110			0.432	1.46361	0.858796	S	S	10
331	169.695	0.78	208	2	111	0.78						M	10
332	-98.13	0.459	208	2	111		0.459					M	10
333	-90	0.262	208	2	111			0.262	1.69935	1.75191	M	M	10
334	150.018	2.073	209	2	112	2.073						M	10
335	-98.13	0.935	209	2	112		0.935					M	10
336	-126.87	0.371	209	2	112			0.371	2.21711	2.52022	M	M	10
337	-10.305	0.78	210	2	113	0.78						S	10
338	-97.125	0.528	210	2	113		0.528					S	10
339	-111.801	0.344	210	2	113			0.344	1.47727	1.53488	S	S	10
340	-14.036	1.109	211	2	114	1.109						M	10
341	82.875	0.58	211	2	114		0.58					M	10
342	33.69	0.286	211	2	114			0.286	1.91207	2.02797	M	M	10
343	167.735	1.672	212	2	115	1.672						M	10
344	-108.435	0.458	212	2	115		0.458					M	10
345	-90	0.212	212	2	115			0.212	3.65066	2.16038	M	M	10
346	138.576	1.531	213	2	116	1.531						M	10
347	-135	0.471	213	2	116		0.471					M	10
348	45	0.165	213	2	116			0.165	3.25053	2.85455	M	M	10
349	-54.462	0.639	214	2	117	0.639						S	10
350	45	0.189	214	2	117		0.189					S	10
351	33.69	0.242	214	2	117			0.242	3.38095	0.780992	S	S	10
352	124.695	2.192	215	2	118	2.192						M	10
353	38.66	0.447	215	2	118		0.447					M	10
354	-135	0.117	215	2	118			0.117	4.9038	3.82051	M	M	10
355	-8.531	1.411	216	2	119	1.411						T	10
356	-84.289	0.7	216	2	119		0.7					T	10
357	81.87	0.459	216	2	119			0.459	2.01571	1.52505	T	T	10
358	-61.557	1.873	217	2	120	1.873						M	10
359	29.745	0.601	217	2	120		0.601					M	10
360	45	0.174	217	2	120			0.174	3.11647	3.45402	M	M	10
361	-51.34	1.8	218	2	121	1.8						T	10
362	26.565	0.199	218	2	121		0.199					T	10
363	71.565	0.18	218	2	121			0.18	9.04523	1.10556	T	T	10
364	164.745	0.842	219	2	122	0.842						M	10
365	74.055	0.513	219	2	122		0.513					M	10
366	90	0.297	219	2	122			0.297	1.64133	1.72727	M	M	10
367	-8.531	1.431	220	2	123	1.431						M	10
368	-99.462	0.37	220	2	123		0.37					M	10
369	-135	0.133	220	2	123			0.133	3.86757	2.78195	M	M	10
370	15.255	0.762	221	2	124	0.762						M	10
371	135	0.407	221	2	124		0.407					M	10
372	63.435	0.141	221	2	124			0.141	1.87224	2.88652	M	M	10
373	-45	0.507	222	2	125	0.507						S	10
374	33.69	0.272	222	2	125		0.272					S	10
375	-126.87	0.322	222	2	125			0.322	1.86397	0.84472	S	S	10
376	133.152	1.519	223	2	126	1.519						M	10
377	52.125	0.806	223	2	126		0.806					M	10
378	26.565	0.15	223	2	126			0.15	1.88462	5.37333	M	M	10
379	159.444	1.192	224	2	127	1.192						T	10
380	-120.964	0.398	224	2	127		0.398					T	10
381	-104.036	0.267	224	2	127			0.267	2.99497	1.49064	T	T	10
382	149.744	1.956	225	2	128	1.956						M	10
383	57.995	0.601	225	2	128		0.601					M	10
384	63.435	0.213	225	2	128			0.213	3.25458	2.8216	M	M	10
385	-40.601	0.666	226	2	129	0.666						M	10
386	-140.194	0.499	226	2	129		0.499					M	10
387	-146.31	0.281	226	2	129			0.281	1.33467	1.7758	M	M	10
388	-36.87	1.374	227	2	130	1.374						M	10
389	41.634	0.826	227	2	130		0.826					M	10
390	-108.435	0.219	227	2	130			0.219	1.66344	3.77169	M	M	10
391	173.29	1.196	228	2	131	1.196						M	10
392	69.444	0.59	228	2	131		0.59					M	10
393	-116.565	0.199	228	2	131			0.199	2.02712	2.96482	M	M	10
394	42.709	1.222	229	2	132	1.222						M	10
395	-77.471	0.63	229	2	132		0.63					M	10
396	-90	0.314	229	2	132			0.314	1.93968	2.00637	M	M	10
397	136.397	2.036	230	2	133	2.036						M	10
398	-135	0.481	230	2	133		0.481					M	10
399	-90	0.227	230	2	133			0.227	4.23285	2.11894	M	M	10
400	104.744	1.375	231	2	134	1.375						M	10
401	-18.435	0.656	231	2	134		0.656					M	10
402	45	0.213	231	2	134			0.213	2.09604	3.07981	M	M	10
403	-11.768	1.663	232	2	135	1.663						T	10
404	-99.462	0.442	232	2	135		0.442					T	10
405	-99.462	0.415	232	2	135			0.415	3.76244	1.06506	T	T	10
406	120.735	3.045	233	2	136	3.045						P	10
407	0	0.646	233	2	136		0.646					P	10
408	-135	0.112	233	2	136			0.112	4.71362	5.76786	P	P	10
409	167.471	0.613	234	2	137	0.613						S	10
410	-98.13	0.52	234	2	137		0.52					S	10
411	-111.801	0.364	234	2	137			0.364	1.17885	1.42857	S	S	10
412	148.496	2.521	235	2	138	2.521						T	10
413	-126.87	0.346	235	2	138		0.346					T	10
414	-123.69	0.242	235	2	138			0.242	7.28613	1.42975	T	T	10
415	-38.157	1.212	236	2	139	1.212						M	10
416	75.964	0.808	236	2	139		0.808					M	10
417	53.13	0.335	236	2	139			0.335	1.5	2.41194	M	M	10
418	-93.691	2.167	237	2	140	2.167						T	10
419	153.435	0.257	237	2	140		0.257					T	10
420	63.435	0.174	237	2	140			0.174	8.43191	1.47701	T	T	10
421	35.538	1.245	238	2	141	1.245						M	10
422	-61.39	0.866	238	2	141		0.866					M	10
423	153.435	0.123	238	2	141			0.123	1.43764	7.04065	M	M	10
424	128.418	2.56	239	2	142	2.56						M	10
425	39.806	0.569	239	2	142		0.569					M	10
426	56.31	0.259	239	2	142			0.259	4.49912	2.19691	M	M	10
427	106.26	1.751	240	2	143	1.751						M	10
428	149.036	0.452	240	2	143		0.452					M	10
429	26.565	0.161	240	2	143			0.161	3.87389	2.80745	M	M	10
430	-60.642	1.218	241	2	144	1.218						M	10
431	-135	0.52	241	2	144		0.52					M	10
432	-116.565	0.174	241	2	144			0.174	2.34231	2.98851	M	M	10
433	-67.38	2.766	242	2	145	2.766						M	10
434	26.565	0.764	242	2	145		0.764					M	10
435	26.565	0.353	242	2	145			0.353	3.62042	2.16431	M	M	10
436	138.814	2.97	243	2	146	2.97						M	10
437	-90	1.168	243	2	146		1.168					M	10
438	45	0.31	243	2	146			0.31	2.54281	3.76774	M	M	10
439	150.945	2.148	244	2	147	2.148						M	10
440	60.255	0.571	244	2	147		0.571					M	10
441	-101.31	0.321	244	2	147			0.321	3.76182	1.77882	M	M	10
442	-54.162	1.587	245	2	148	1.587						M	10
443	180	0.681	245	2	148		0.681					M	10
444	0	0.281	245	2	148			0.281	2.3304	2.42349	M	M	10
445	171.573	3.813	246	2	149	3.813						P	10
446	-63.435	0.664	246	2	149		0.664					P	10
447	45	0.496	246	2	149			0.496	5.74247	1.33871	P	P	10
1	119.982	3.251	247	3	1	3.251						P	8
2	26.565	0.462	247	3	1		0.462					P	8
3	45	0.306	247	3	1			0.306	7.0368	1.5098	P	P	8
4	137.49	1.767	248	3	2	1.767						M	8
5	45	0.905	248	3	2		0.905					M	8
6	71.565	0.383	248	3	2			0.383	1.95249	2.36292	M	M	8
7	-147.995	1.05	249	3	3	1.05						T	8
8	-45	0.505	249	3	3		0.505					T	8
9	123.69	0.398	249	3	3			0.398	2.07921	1.26884	T	T	8
10	26.565	1.179	250	3	4	1.179						M	8
11	-94.399	1.352	250	3	4		1.352					M	8
12	-78.69	0.586	250	3	4			0.586	0.872041	2.30717	M	M	8
13	133.152	2.352	251	3	5	2.352						T	8
14	45	0.843	251	3	5		0.843					T	8
15	45	0.579	251	3	5			0.579	2.79004	1.45596	T	T	8
16	125.538	0.996	252	3	6	0.996						M	8
17	-143.13	0.484	252	3	6		0.484					M	8
18	0	0.096	252	3	6			0.096	2.05785	5.04167	M	M	8
19	-90	1.351	253	3	7	1.351						M	8
20	29.745	0.876	253	3	7		0.876					M	8
21	18.435	0.332	253	3	7			0.332	1.54224	2.63855	M	M	8
22	-8.746	1.436	254	3	8	1.436						M	8
23	-101.31	0.596	254	3	8		0.596					M	8
24	-108.435	0.328	254	3	8			0.328	2.4094	1.81707	M	M	8
25	-159.444	0.832	255	3	9	0.832						S	8
26	-59.036	0.589	255	3	9		0.589					S	8
27	71.565	0.377	255	3	9			0.377	1.41256	1.56233	S	S	8
28	118.61	1.387	256	3	10	1.387						T	8
29	56.31	0.434	256	3	10		0.434					T	8
30	0	0.445	256	3	10			0.445	3.19585	0.975281	T	T	8
31	120.964	1.189	257	3	11	1.189						T	8
32	45	0.566	257	3	11		0.566					T	8
33	36.87	0.469	257	3	11			0.469	2.10071	1.20682	T	T	8
34	-35.538	0.87	258	3	12	0.87						S	8
35	45	0.83	258	3	12		0.83					S	8
36	53.13	0.523	258	3	12			0.523	1.04819	1.587	S	S	8
37	127.875	1.227	259	3	13	1.227						M	8
38	39.806	0.886	259	3	13		0.886					M	8
39	45	0.303	259	3	13			0.303	1.38488	2.92409	M	M	8
40	-57.995	1.05	260	3	14	1.05						M	8
41	30.964	0.552	260	3	14		0.552					M	8
42	180	0.269	260	3	14			0.269	1.90217	2.05204	M	M	8
43	-56.31	2.284	261	3	15	2.284						T	8
44	21.801	0.549	261	3	15		0.549					T	8
45	45	0.392	261	3	15			0.392	4.16029	1.40051	T	T	8
46	119.745	1.703	262	3	16	1.703						M	8
47	-8.13	0.79	262	3	16		0.79					M	8
48	56.31	0.367	262	3	16			0.367	2.1557	2.15259	M	M	8
49	131.634	1.258	263	3	17	1.258						M	8
50	45	0.619	263	3	17		0.619					M	8
51	63.435	0.207	263	3	17			0.207	2.03231	2.99034	M	M	8
52	161.565	0.945	264	3	18	0.945						M	8
53	-96.34	0.966	264	3	18		0.966					M	8
54	90	0.462	264	3	18			0.462	0.978261	2.09091	M	M	8
55	-51.34	0.667	265	3	19	0.667						S	8
56	36.87	0.516	265	3	19		0.516					S	8
57	45	0.321	265	3	19			0.321	1.29264	1.60748	S	S	8
58	139.399	0.968	266	3	20	0.968						S	8
59	-120.964	0.613	266	3	20		0.613					S	8
60	-123.69	0.366	266	3	20			0.366	1.57912	1.67486	S	S	8
61	-35.538	0.961	267	3	21	0.961						M	8
62	56.31	0.39	267	3	21		0.39					M	8
63	-135	0.201	267	3	21			0.201	2.4641	1.9403	M	M	8
64	-102.995	1.395	268	3	22	1.395						M	8
65	-9.462	0.664	268	3	22		0.664					M	8
66	18.435	0.367	268	3	22			0.367	2.1009	1.80926	M	M	8
67	-150.255	0.884	269	3	23	0.884						M	8
68	-56.31	0.755	269	3	23		0.755					M	8
69	-75.964	0.415	269	3	23			0.415	1.17086	1.81928	M	M	8
70	131.186	2.357	270	3	24	2.357						M	8
71	171.87	0.75	270	3	24		0.75					M	8
72	45	0.278	270	3	24			0.278	3.14267	2.69784	M	M	8
73	119.745	0.869	271	3	25	0.869						S	8
74	38.66	0.658	271	3	25		0.658					S	8
75	33.69	0.395	271	3	25			0.395	1.32067	1.66582	S	S	8
76	-135	1.333	272	3	26	1.333						M	8
77	-23.962	1.034	272	3	26		1.034					M	8
78	-56.31	0.41	272	3	26			0.41	1.28917	2.52195	M	M	8
79	-34.695	1.751	273	3	27	1.751						T	8
80	63.435	0.485	273	3	27		0.485					T	8
81	-108.435	0.421	273	3	27			0.421	3.61031	1.15202	T	T	8
82	169.695	1.238	274	3	28	1.238						T	8
83	-111.801	0.581	274	3	28		0.581					T	8
84	-90	0.393	274	3	28			0.393	2.13081	1.47837	T	T	8
85	-135	0.769	275	3	29	0.769						S	8
86	-66.801	0.891	275	3	29		0.891					S	8
87	-68.199	0.565	275	3	29			0.565	0.863075	1.57699	S	S	8
88	-79.695	1.126	276	3	30	1.126						M	8
89	9.462	0.582	276	3	30		0.582					M	8
90	26.565	0.264	276	3	30			0.264	1.93471	2.20455	M	M	8
91	-33.69	0.717	277	3	31	0.717						M	8
92	56.31	0.424	277	3	31		0.424					M	8
93	-116.565	0.223	277	3	31			0.223	1.69104	1.90135	M	M	8
94	-7.125	0.926	278	3	32	0.926						M	8
95	-104.036	0.44	278	3	32		0.44					M	8
96	-90	0.231	278	3	32			0.231	2.10455	1.90476	M	M	8
97	12.529	0.991	279	3	33	0.991						S	8
98	101.31	0.471	279	3	33		0.471					S	8
99	-90	0.342	279	3	33			0.342	2.10403	1.37719	S	S	8
100	125.538	0.942	280	3	34	0.942						M	8
101	26.565	0.464	280	3	34		0.464					M	8
102	45	0.239	280	3	34			0.239	2.03017	1.94142	M	M	8
103	0	1.458	281	3	35	1.458						M	8
104	84.289	1.092	281	3	35		1.092					M	8
105	-101.31	0.554	281	3	35			0.554	1.33516	1.97112	M	M	8
106	-49.399	0.967	282	3	36	0.967						S	8
107	26.565	0.558	282	3	36		0.558					S	8
108	45	0.335	282	3	36			0.335	1.73297	1.66567	S	S	8
109	-29.745	0.893	283	3	37	0.893						M	8
110	-123.69	1.116	283	3	37		1.116					M	8
111	53.13	0.525	283	3	37			0.525	0.800179	2.12571	M	M	8
112	173.29	1.833	284	3	38	1.833						M	8
113	60.255	0.852	284	3	38		0.852					M	8
114	-90	0.342	284	3	38			0.342	2.15141	2.49123	M	M	8
115	-141.34	1.305	285	3	39	1.305						T	8
116	-53.13	0.548	285	3	39		0.548					T	8
117	-90	0.363	285	3	39			0.363	2.38139	1.50964	T	T	8
118	123.69	1.199	286	3	40	1.199						M	8
119	56.31	0.442	286	3	40		0.442					M	8
120	0	0.128	286	3	40			0.128	2.71267	3.45312	M	M	8
121	-80.538	2.032	287	3	41	2.032						M	8
122	180	0.64	287	3	41		0.64					M	8
123	-18.435	0.36	287	3	41			0.36	3.175	1.77778	M	M	8
124	112.62	1.294	288	3	42	1.294						M	8
125	26.565	0.437	288	3	42		0.437					M	8
126	180	0.249	288	3	42			0.249	2.9611	1.75502	M	M	8
127	83.66	0.931	289	3	43	0.931						M	8
128	-9.462	0.66	289	3	43		0.66					M	8
129	0	0.231	289	3	43			0.231	1.41061	2.85714	M	M	8
130	130.601	1.003	290	3	44	1.003						T	8
131	-135	0.43	290	3	44		0.43					T	8
132	18.435	0.281	290	3	44			0.281	2.33256	1.53025	T	T	8
133	99.462	1.363	291	3	45	1.363						M	8
134	0	0.622	291	3	45		0.622					M	8
135	26.565	0.298	291	3	45			0.298	2.19132	2.08725	M	M	8
136	-94.399	1.389	292	3	46	1.389						T	8
137	-26.565	0.449	292	3	46		0.449					T	8
138	14.036	0.412	292	3	46			0.412	3.09354	1.08981	T	T	8
139	-33.69	1.899	293	3	47	1.899						T	8
140	-135	0.629	293	3	47		0.629					T	8
141	45	0.44	293	3	47			0.44	3.01908	1.42955	T	T	8
142	98.13	1.516	294	3	48	1.516						T	8
143	11.31	0.503	294	3	48		0.503					T	8
144	0	0.304	294	3	48			0.304	3.01392	1.65461	T	T	8
145	124.509	2.037	295	3	49	2.037						M	8
146	-168.69	0.591	295	3	49		0.591					M	8
147	45	0.303	295	3	49			0.303	3.4467	1.9505	M	M	8
148	-56.31	0.765	296	3	50	0.765						S	8
149	45	0.619	296	3	50		0.619					S	8
150	33.69	0.417	296	3	50			0.417	1.23586	1.48441	S	S	8
151	100.008	1.862	297	3	51	1.862						T	8
152	0	0.644	297	3	51		0.644					T	8
153	0	0.569	297	3	51			0.569	2.8913	1.13181	T	T	8
154	-69.146	2.443	298	3	52	2.443						T	8
155	-165.964	0.472	298	3	52		0.472					T	8
156	18.435	0.302	298	3	52			0.302	5.17585	1.56291	T	T	8
157	102.529	1.001	299	3	53	1.001						M	8
158	0	0.749	299	3	53		0.749					M	8
159	18.435	0.405	299	3	53			0.405	1.33645	1.84938	M	M	8
160	104.036	0.906	300	3	54	0.906						M	8
161	-164.055	0.755	300	3	54		0.755					M	8
162	18.435	0.255	300	3	54			0.255	1.2	2.96078	M	M	8
163	-135	0.968	301	3	55	0.968						S	8
164	-21.801	0.598	301	3	55		0.598					S	8
165	-26.565	0.473	301	3	55			0.473	1.61873	1.26427	S	S	8
166	-138.366	1.308	302	3	56	1.308						T	8
167	-53.13	0.528	302	3	56		0.528					T	8
168	-78.69	0.462	302	3	56			0.462	2.47727	1.14286	T	T	8
169	-49.399	1.007	303	3	57	1.007						T	8
170	45	0.38	303	3	57		0.38					T	8
171	-135	0.264	303	3	57			0.264	2.65	1.43939	T	T	8
172	-50.194	1.63	304	3	58	1.63						M	8
173	49.399	0.975	304	3	58		0.975					M	8
174	33.69	0.43	304	3	58			0.43	1.67179	2.26744	M	M	8
175	-29.745	0.819	305	3	59	0.819						M	8
176	59.036	0.668	305	3	59		0.668					M	8
177	-108.435	0.36	305	3	59			0.36	1.22605	1.85556	M	M	8
178	-45	0.592	306	3	60	0.592						M	8
179	-126.87	0.529	306	3	60		0.529					M	8
180	-135	0.264	306	3	60			0.264	1.11909	2.00379	M	M	8
181	-29.745	0.845	307	3	61	0.845						S	8
182	63.435	0.434	307	3	61		0.434					S	8
183	-123.69	0.327	307	3	61			0.327	1.947	1.32722	S	S	8
184	-45	0.747	308	3	62	0.747						S	8
185	36.87	0.455	308	3	62		0.455					S	8
186	53.13	0.517	308	3	62			0.517	1.64176	0.880077	S	S	8
187	171.87	0.79	309	3	63	0.79						S	8
188	-104.036	0.4	309	3	63		0.4					S	8
189	-71.565	0.272	309	3	63			0.272	1.975	1.47059	S	S	8
190	135	1.936	310	3	64	1.936						M	8
191	30.964	0.695	310	3	64		0.695					M	8
192	56.31	0.382	310	3	64			0.382	2.78561	1.81937	M	M	8
193	-171.87	0.715	311	3	65	0.715						S	8
194	-78.69	0.558	311	3	65		0.558					S	8
195	-90	0.338	311	3	65			0.338	1.28136	1.65089	S	S	8
196	-149.036	0.605	312	3	66	0.605						S	8
197	-45	0.492	312	3	66		0.492					S	8
198	-90	0.307	312	3	66			0.307	1.22967	1.60261	S	S	8
199	-33.69	0.79	313	3	67	0.79						S	8
200	-111.801	0.589	313	3	67		0.589					S	8
201	56.31	0.38	313	3	67			0.38	1.34126	1.55	S	S	8
202	-57.995	2.077	314	3	68	2.077						M	8
203	39.806	0.842	314	3	68		0.842					M	8
204	26.565	0.287	314	3	68			0.287	2.46675	2.9338	M	M	8
205	-49.764	1.778	315	3	69	1.778						T	8
206	45	0.616	315	3	69		0.616					T	8
207	45	0.517	315	3	69			0.517	2.88636	1.19149	T	T	8
208	-98.13	0.823	316	3	70	0.823						S	8
209	0	0.43	316	3	70		0.43					S	8
210	-18.435	0.304	316	3	70			0.304	1.91395	1.41447	S	S	8
211	129.806	1.664	317	3	71	1.664						M	8
212	33.69	0.796	317	3	71		0.796					M	8
213	-135	0.34	317	3	71			0.34	2.09045	2.34118	M	M	8
214	-53.13	1.12	318	3	72	1.12						M	8
215	45	0.597	318	3	72		0.597					M	8
216	45	0.289	318	3	72			0.289	1.87605	2.06574	M	M	8
217	116.565	1.965	319	3	73	1.965						M	8
218	20.556	0.86	319	3	73		0.86					M	8
219	18.435	0.318	319	3	73			0.318	2.28488	2.7044	M	M	8
220	0	0.978	320	3	74	0.978						M	8
221	94.764	1.323	320	3	74		1.323					M	8
222	-90	0.605	320	3	74			0.605	0.739229	2.18678	M	M	8
223	-33.69	1.15	321	3	75	1.15						M	8
224	-104.036	0.845	321	3	75		0.845					M	8
225	63.435	0.479	321	3	75			0.479	1.36095	1.76409	M	M	8
226	-48.814	1.152	322	3	76	1.152						M	8
227	45	0.587	322	3	76		0.587					M	8
228	-135	0.264	322	3	76			0.264	1.96252	2.22348	M	M	8
229	5.711	1.049	323	3	77	1.049						T	8
230	90	0.321	323	3	77		0.321					T	8
231	-90	0.401	323	3	77			0.401	3.26791	0.800499	T	T	8
232	12.529	1	324	3	78	1						M	8
233	-71.565	1.063	324	3	78		1.063					M	8
234	90	0.373	324	3	78			0.373	0.940734	2.84987	M	M	8
235	163.301	1.139	325	3	79	1.139						T	8
236	-116.565	0.54	325	3	79		0.54					T	8
237	75.964	0.374	325	3	79			0.374	2.10926	1.44385	T	T	8
238	161.565	1.41	326	3	80	1.41						T	8
239	-97.125	0.857	326	3	80		0.857					T	8
240	-111.801	0.563	326	3	80			0.563	1.64527	1.5222	T	T	8
241	180	0.907	327	3	81	0.907						S	8
242	-98.13	0.781	327	3	81		0.781					S	8
243	-101.31	0.616	327	3	81			0.616	1.16133	1.26786	S	S	8
244	180	0.72	328	3	82	0.72						S	8
245	-101.31	0.602	328	3	82		0.602					S	8
246	75.964	0.396	328	3	82			0.396	1.19601	1.5202	S	S	8
247	168.69	1.083	329	3	83	1.083						T	8
248	-90	0.614	329	3	83		0.614					T	8
249	-99.462	0.582	329	3	83			0.582	1.76384	1.05498	T	T	8
250	165.964	1.269	330	3	84	1.269						T	8
251	-135	0.529	330	3	84		0.529					T	8
252	-90	0.393	330	3	84			0.393	2.39887	1.34606	T	T	8
253	164.055	0.821	331	3	85	0.821						S	8
254	-98.13	0.754	331	3	85		0.754					S	8
255	-90	0.533	331	3	85			0.533	1.08886	1.41463	S	S	8
256	-33.69	1.154	332	3	86	1.154						T	8
257	45	0.302	332	3	86		0.302					T	8
258	-90	0.213	332	3	86			0.213	3.82119	1.41784	T	T	8
259	146.31	1.169	333	3	87	1.169						M	8
260	-143.13	0.577	333	3	87		0.577					M	8
261	-108.435	0.312	333	3	87			0.312	2.026	1.84936	M	M	8
262	120.964	1.213	334	3	88	1.213						M	8
263	-146.31	0.725	334	3	88		0.725					M	8
264	33.69	0.422	334	3	88			0.422	1.6731	1.71801	M	M	8
265	-33.69	1.222	335	3	89	1.222						T	8
266	-108.435	0.371	335	3	89		0.371					T	8
267	-153.435	0.246	335	3	89			0.246	3.2938	1.50813	T	T	8
268	119.358	1.972	336	3	90	1.972						T	8
269	180	0.427	336	3	90		0.427					T	8
270	0	0.32	336	3	90			0.32	4.61827	1.33437	T	T	8
271	-35.218	2.31	337	3	91	2.31						T	8
272	81.87	0.764	337	3	91		0.764					T	8
273	11.31	0.57	337	3	91			0.57	3.02356	1.34035	T	T	8
274	85.236	1.37	338	3	92	1.37						M	8
275	0	0.72	338	3	92		0.72					M	8
276	161.565	0.356	338	3	92			0.356	1.90278	2.02247	M	M	8
277	119.358	1.889	339	3	93	1.889						T	8
278	-149.036	0.592	339	3	93		0.592					T	8
279	-104.036	0.414	339	3	93			0.414	3.19088	1.42995	T	T	8
280	-33.69	1.148	340	3	94	1.148						T	8
281	-104.036	0.44	340	3	94		0.44					T	8
282	-108.435	0.311	340	3	94			0.311	2.60909	1.41479	T	T	8
283	-71.565	2.726	341	3	95	2.726						T	8
284	-90	0.382	341	3	95		0.382					T	8
285	0	0.267	341	3	95			0.267	7.13613	1.43071	T	T	8
286	101.31	1.591	342	3	96	1.591						T	8
287	21.801	0.537	342	3	96		0.537					T	8
288	-161.565	0.356	342	3	96			0.356	2.96276	1.50843	T	T	8
289	-63.435	1.408	343	3	97	1.408						T	8
290	-135	0.434	343	3	97		0.434					T	8
291	26.565	0.417	343	3	97			0.417	3.24424	1.04077	T	T	8
292	119.055	1.098	344	3	98	1.098						T	8
293	36.87	0.573	344	3	98		0.573					T	8
294	-123.69	0.437	344	3	98			0.437	1.91623	1.31121	T	T	8
295	133.152	2.32	345	3	99	2.32						T	8
296	56.31	0.417	345	3	99		0.417					T	8
297	45	0.302	345	3	99			0.302	5.56355	1.38079	T	T	8
298	-26.565	0.956	346	3	100	0.956						S	8
299	-116.565	0.481	346	3	100		0.481					S	8
300	-116.565	0.477	346	3	100			0.477	1.98753	1.00839	S	S	8
301	103.241	1.768	347	3	101	1.768						M	8
302	180	0.933	347	3	101		0.933					M	8
303	21.801	0.515	347	3	101			0.515	1.89496	1.81165	M	M	8
304	77.005	1.407	348	3	102	1.407						T	8
305	0	0.4	348	3	102		0.4					T	8
306	0	0.293	348	3	102			0.293	3.5175	1.36519	T	T	8
307	-54.462	0.971	349	3	103	0.971						M	8
308	45	0.585	349	3	103		0.585					M	8
309	26.565	0.239	349	3	103			0.239	1.65983	2.4477	M	M	8
310	-105.945	2.264	350	3	104	2.264						T	8
311	-33.69	0.379	350	3	104		0.379					T	8
312	-26.565	0.503	350	3	104			0.503	5.97361	0.753479	T	T	8
313	116.565	1.145	351	3	105	1.145						T	8
314	33.69	0.348	351	3	105		0.348					T	8
315	26.565	0.275	351	3	105			0.275	3.29023	1.26545	T	T	8
316	-85.236	1.283	352	3	106	1.283						T	8
317	-143.13	0.51	352	3	106		0.51					T	8
318	0	0.48	352	3	106			0.48	2.51569	1.0625	T	T	8
319	-92.386	2.562	353	3	107	2.562						M	8
320	15.945	0.738	353	3	107		0.738					M	8
321	0	0.32	353	3	107			0.32	3.47154	2.30625	M	M	8
322	-25.017	1.766	354	3	108	1.766						M	8
323	-116.565	0.981	354	3	108		0.981					M	8
324	75.964	0.406	354	3	108			0.406	1.8002	2.41626	M	M	8
325	120.466	2.058	355	3	109	2.058						M	8
326	-135	0.623	355	3	109		0.623					M	8
327	-153.435	0.275	355	3	109			0.275	3.30337	2.26545	M	M	8
328	70.71	2.269	356	3	110	2.269						M	8
329	-59.036	0.629	356	3	110		0.629					M	8
330	-14.036	0.356	356	3	110			0.356	3.60731	1.76685	M	M	8
331	124.695	1.761	357	3	111	1.761						M	8
332	-149.036	0.622	357	3	111		0.622					M	8
333	33.69	0.348	357	3	111			0.348	2.83119	1.78736	M	M	8
334	131.186	1.113	358	3	112	1.113						M	8
335	-153.435	0.705	358	3	112		0.705					M	8
336	-135	0.189	358	3	112			0.189	1.57872	3.73016	M	M	8
337	-57.529	1.42	359	3	113	1.42						M	8
338	-135	0.793	359	3	113		0.793					M	8
339	-153.435	0.228	359	3	113			0.228	1.79067	3.47807	M	M	8
340	-68.199	1.199	360	3	114	1.199						T	8
341	-123.69	0.363	360	3	114		0.363					T	8
342	0	0.298	360	3	114			0.298	3.30303	1.21812	T	T	8
343	165.964	0.945	361	3	115	0.945						S	8
344	-104.036	0.351	361	3	115		0.351					S	8
345	-135	0.454	361	3	115			0.454	2.69231	0.773128	S	S	8
346	-53.13	1.654	362	3	116	1.654						T	8
347	-135	0.512	362	3	116		0.512					T	8
348	45	0.547	362	3	116			0.547	3.23047	0.936015	T	T	8
349	-90	0.8	363	3	117	0.8						S	8
350	0	0.561	363	3	117		0.561					S	8
351	0	0.453	363	3	117			0.453	1.42602	1.23841	S	S	8
352	143.13	1.633	364	3	118	1.633						T	8
353	-141.34	0.68	364	3	118		0.68					T	8
354	-128.66	0.623	364	3	118			0.623	2.40147	1.09149	T	T	8
355	-40.365	2.813	365	3	119	2.813						T	8
356	26.565	0.453	365	3	119		0.453					T	8
357	71.565	0.388	365	3	119			0.388	6.20971	1.16753	T	T	8
358	-75.964	2.115	366	3	120	2.115						M	8
359	45	0.867	366	3	120		0.867					M	8
360	180	0.373	366	3	120			0.373	2.43945	2.3244	M	M	8
361	-85.914	1.446	367	3	121	1.446						T	8
362	12.529	1.01	367	3	121		1.01					T	8
363	180	0.747	367	3	121			0.747	1.43168	1.35207	T	T	8
364	-63.435	0.979	368	3	122	0.979						S	8
365	21.801	1.159	368	3	122		1.159					S	8
366	-171.87	0.692	368	3	122			0.692	0.844694	1.67486	S	S	8
367	32.471	1.459	369	3	123	1.459						T	8
368	128.66	0.587	369	3	123		0.587					T	8
369	-75.964	0.447	369	3	123			0.447	2.48552	1.3132	T	T	8
370	135	0.867	370	3	124	0.867						S	8
371	-146.31	0.437	370	3	124		0.437					S	8
372	-146.31	0.385	370	3	124			0.385	1.98398	1.13506	S	S	8
373	-12.804	2.401	371	3	125	2.401						M	8
374	74.055	0.822	371	3	125		0.822					M	8
375	-135	0.359	371	3	125			0.359	2.92092	2.28969	M	M	8
376	122.735	1.694	372	3	126	1.694						M	8
377	-129.806	0.793	372	3	126		0.793					M	8
378	33.69	0.417	372	3	126			0.417	2.13619	1.90168	M	M	8
379	-55.923	4.328	373	3	127	4.328						P	8
380	38.66	0.747	373	3	127		0.747					P	8
381	-135	0.453	373	3	127			0.453	5.79384	1.64901	P	P	8
382	-29.745	0.895	374	3	128	0.895						S	8
383	-126.87	0.526	374	3	128		0.526					S	8
384	-108.435	0.363	374	3	128			0.363	1.70152	1.44904	S	S	8
385	153.435	1.229	375	3	129	1.229						M	8
386	-116.565	0.563	375	3	129		0.563					M	8
387	-135	0.321	375	3	129			0.321	2.18295	1.75389	M	M	8
388	124.992	1.206	376	3	130	1.206						T	8
389	11.31	0.55	376	3	130		0.55					T	8
390	11.31	0.506	376	3	130			0.506	2.19273	1.08696	T	T	8
391	-45	0.849	377	3	131	0.849						S	8
392	-135	0.4	377	3	131		0.4					S	8
393	36.87	0.51	377	3	131			0.51	2.1225	0.784314	S	S	8
394	-48.013	1.435	378	3	132	1.435						T	8
395	36.87	0.513	378	3	132		0.513					T	8
396	-146.31	0.371	378	3	132			0.371	2.79727	1.38275	T	T	8
397	143.13	0.555	379	3	133	0.555						S	8
398	-153.435	0.287	379	3	133		0.287					S	8
399	-108.435	0.348	379	3	133			0.348	1.9338	0.824713	S	S	8
400	153.435	0.751	380	3	134	0.751						S	8
401	-135	0.437	380	3	134		0.437					S	8
402	-146.31	0.339	380	3	134			0.339	1.71854	1.28909	S	S	8
403	120.466	2.187	381	3	135	2.187						T	8
404	-153.435	0.252	381	3	135		0.252					T	8
405	0	0.454	381	3	135			0.454	8.67857	0.555066	T	T	8
406	164.055	0.751	382	3	136	0.751						S	8
407	-116.565	0.475	382	3	136		0.475					S	8
408	-116.565	0.503	382	3	136			0.503	1.58105	0.944334	S	S	8
409	-176.424	1.714	383	3	137	1.714						T	8
410	-78.69	0.518	383	3	137		0.518					T	8
411	108.435	0.408	383	3	137			0.408	3.30888	1.26961	T	T	8
412	-135	1.622	384	3	138	1.622						T	8
413	158.199	0.599	384	3	138		0.599					T	8
414	90	0.533	384	3	138			0.533	2.70785	1.12383	T	T	8
415	156.801	0.827	385	3	139	0.827						S	8
416	-123.69	0.371	385	3	139		0.371					S	8
417	-108.435	0.33	385	3	139			0.33	2.22911	1.12424	S	S	8
418	138.013	1.421	386	3	140	1.421						T	8
419	-135	0.339	386	3	140		0.339					T	8
420	56.31	0.321	386	3	140			0.321	4.19174	1.05607	T	T	8
421	137.726	1.547	387	3	141	1.547						M	8
422	-153.435	0.422	387	3	141		0.422					M	8
423	26.565	0.208	387	3	141			0.208	3.66588	2.02885	M	M	8
424	147.995	0.993	388	3	142	0.993						S	8
425	-120.964	0.608	388	3	142		0.608					S	8
426	-104.036	0.431	388	3	142			0.431	1.63322	1.41067	S	S	8
427	124.992	1.254	389	3	143	1.254						T	8
428	-153.435	0.518	389	3	143		0.518					T	8
429	11.31	0.539	389	3	143			0.539	2.42085	0.961039	T	T	8
430	-173.66	0.987	390	3	144	0.987						M	8
431	-75.964	0.874	390	3	144		0.874					M	8
432	-90	0.507	390	3	144			0.507	1.12929	1.72387	M	M	8
433	-41.186	1.075	391	3	145	1.075						M	8
434	45	0.605	391	3	145		0.605					M	8
435	-153.435	0.228	391	3	145			0.228	1.77686	2.65351	M	M	8
436	-68.962	1.527	392	3	146	1.527						T	8
437	-161.565	0.667	392	3	146		0.667					T	8
438	14.036	0.422	392	3	146			0.422	2.28936	1.58057	T	T	8
439	-67.38	1.422	393	3	147	1.422						T	8
440	-165.964	0.481	393	3	147		0.481					T	8
441	26.565	0.466	393	3	147			0.466	2.95634	1.03219	T	T	8
442	-56.31	1.479	394	3	148	1.479						T	8
443	-126.87	0.472	394	3	148		0.472					T	8
444	-116.565	0.283	394	3	148			0.283	3.13347	1.66784	T	T	8
445	-59.036	2.495	395	3	149	2.495						T	8
446	21.801	0.599	395	3	149		0.599					T	8
447	-146.31	0.453	395	3	149			0.453	4.16528	1.3223	T	T	8
448	-67.38	1.362	396	3	150	1.362						T	8
449	-170.538	0.672	396	3	150		0.672					T	8
450	14.036	0.431	396	3	150			0.431	2.02679	1.55916	T	T	8
451	-70.017	1.224	397	3	151	1.224						T	8
452	-149.036	0.609	397	3	151		0.609					T	8
453	-135	0.359	397	3	151			0.359	2.00985	1.69638	T	T	8
454	-33.69	1.176	398	3	152	1.176						T	8
455	-101.31	0.576	398	3	152		0.576					T	8
456	71.565	0.363	398	3	152			0.363	2.04167	1.58678	T	T	8
457	176.186	1.558	399	3	153	1.558						M	8
458	-105.945	0.802	399	3	153		0.802					M	8
459	-90	0.401	399	3	153			0.401	1.94264	2	M	M	8
460	113.962	1.073	400	3	154	1.073						M	8
461	-165.964	0.473	400	3	154		0.473					M	8
462	180	0.203	400	3	154			0.203	2.2685	2.33005	M	M	8
463	-144.462	0.896	401	3	155	0.896						S	8
464	-45	0.417	401	3	155		0.417					S	8
465	-71.565	0.298	401	3	155			0.298	2.14868	1.39933	S	S	8
466	-123.69	0.814	402	3	156	0.814						S	8
467	-45	0.566	402	3	156		0.566					S	8
468	-45	0.379	402	3	156			0.379	1.43816	1.4934	S	S	8
469	120.256	1.469	403	3	157	1.469						M	8
470	-150.255	0.801	403	3	157		0.801					M	8
471	-161.565	0.311	403	3	157			0.311	1.83396	2.57556	M	M	8
472	-113.199	0.743	404	3	158	0.743						S	8
473	159.444	0.911	404	3	158		0.911					S	8
474	-9.462	0.654	404	3	158			0.654	0.815587	1.39297	S	S	8
475	161.565	0.718	405	3	159	0.718						M	8
476	-104.036	0.356	405	3	159		0.356					M	8
477	-90	0.203	405	3	159			0.203	2.01685	1.75369	M	M	8
478	-59.036	1.277	406	3	160	1.277						T	8
479	-143.13	0.54	406	3	160		0.54					T	8
480	0	0.427	406	3	160			0.427	2.36481	1.26464	T	T	8
481	143.973	1.526	407	3	161	1.526						M	8
482	57.529	1.465	407	3	161		1.465					M	8
483	-119.745	0.835	407	3	161			0.835	1.04164	1.75449	M	M	8
484	-74.055	2.348	408	3	162	2.348						T	8
485	-153.435	0.459	408	3	162		0.459					T	8
486	45	0.339	408	3	162			0.339	5.11547	1.35398	T	T	8
487	-28.072	1.803	409	3	163	1.803						M	8
488	11.31	0.634	409	3	163		0.634					M	8
489	33.69	0.359	409	3	163			0.359	2.84385	1.76602	M	M	8
490	126.87	2.155	410	3	164	2.155						M	8
491	-153.435	0.467	410	3	164		0.467					M	8
492	0	0.194	410	3	164			0.194	4.61456	2.40722	M	M	8
493	156.801	0.827	411	3	165	0.827						S	8
494	-135	0.417	411	3	165		0.417					S	8
495	-135	0.283	411	3	165			0.283	1.98321	1.4735	S	S	8
496	-59.931	2.369	412	3	166	2.369						T	8
497	-146.31	0.334	412	3	166		0.334					T	8
498	-135	0.459	412	3	166			0.459	7.09281	0.727669	T	T	8
499	-74.055	1.553	413	3	167	1.553						M	8
500	-153.435	0.49	413	3	167		0.49					M	8
501	26.565	0.267	413	3	167			0.267	3.16939	1.83521	M	M	8
502	138.366	1.305	414	3	168	1.305						T	8
503	-146.31	0.334	414	3	168		0.334					T	8
504	-153.435	0.287	414	3	168			0.287	3.90719	1.16376	T	T	8
505	121.608	1.583	415	3	169	1.583						T	8
506	-161.565	0.406	415	3	169		0.406					T	8
507	18.435	0.304	415	3	169			0.304	3.89901	1.33553	T	T	8
508	90	1.253	416	3	170	1.253						M	8
509	9.462	0.614	416	3	170		0.614					M	8
510	0	0.347	416	3	170			0.347	2.04072	1.76945	M	M	8
511	-45	1.358	417	3	171	1.358						T	8
512	-123.69	0.43	417	3	171		0.43					T	8
513	-135	0.264	417	3	171			0.264	3.15814	1.62879	T	T	8
514	138.366	1.285	418	3	172	1.285						T	8
515	-143.13	0.533	418	3	172		0.533					T	8
516	-123.69	0.396	418	3	172			0.396	2.41088	1.34596	T	T	8
517	-66.801	0.812	419	3	173	0.812						M	8
518	-165.964	0.473	419	3	173		0.473					M	8
519	0	0.267	419	3	173			0.267	1.7167	1.77154	M	M	8
520	-116.565	0.764	420	3	174	0.764						S	8
521	149.036	0.644	420	3	174		0.644					S	8
522	0	0.487	420	3	174			0.487	1.18634	1.32238	S	S	8
523	-68.199	1.645	421	3	175	1.645						M	8
524	-161.565	1.041	421	3	175		1.041					M	8
525	18.435	0.298	421	3	175			0.298	1.58021	3.49329	M	M	8
526	120.964	1.231	422	3	176	1.231						T	8
527	-143.13	0.503	422	3	176		0.503					T	8
528	-14.036	0.414	422	3	176			0.414	2.44732	1.21498	T	T	8
529	-73.74	2.7	423	3	177	2.7						M	8
530	-171.87	0.807	423	3	177		0.807					M	8
531	0	0.404	423	3	177			0.404	3.34572	1.99752	M	M	8
532	154.799	1.947	424	3	178	1.947						M	8
533	-101.31	0.544	424	3	178		0.544					M	8
534	-123.69	0.304	424	3	178			0.304	3.57904	1.78947	M	M	8
535	-48.366	1.247	425	3	179	1.247						T	8
536	-135	0.454	425	3	179		0.454					T	8
537	-135	0.283	425	3	179			0.283	2.7467	1.60424	T	T	8
538	-53.13	1.046	426	3	180	1.046						T	8
539	45	0.721	426	3	180		0.721					T	8
540	-153.435	0.43	426	3	180			0.43	1.45076	1.67674	T	T	8
541	-21.801	1.164	427	3	181	1.164						M	8
542	-113.199	0.751	427	3	181		0.751					M	8
543	-116.565	0.437	427	3	181			0.437	1.54993	1.71854	M	M	8
544	-47.726	1.643	428	3	182	1.643						M	8
545	-141.34	0.755	428	3	182		0.755					M	8
546	45	0.434	428	3	182			0.434	2.17616	1.73963	M	M	8
547	135	1.245	429	3	183	1.245						T	8
548	56.31	0.422	429	3	183		0.422					T	8
549	26.565	0.312	429	3	183			0.312	2.95024	1.35256	T	T	8
550	122.735	1.821	430	3	184	1.821						M	8
551	35.538	0.891	430	3	184		0.891					M	8
552	-165.964	0.382	430	3	184			0.382	2.04377	2.33246	M	M	8
553	111.038	1.52	431	3	185	1.52						T	8
554	-168.69	0.566	431	3	185		0.566					T	8
555	18.435	0.401	431	3	185			0.401	2.68551	1.41147	T	T	8
556	139.399	1.021	432	3	186	1.021						M	8
557	-140.194	0.779	432	3	186		0.779					M	8
558	-161.565	0.358	432	3	186			0.358	1.31065	2.17598	M	M	8
559	-41.82	2.775	433	3	187	2.775						T	8
560	-128.66	0.592	433	3	187		0.592					T	8
561	-126.87	0.496	433	3	187			0.496	4.6875	1.19355	T	T	8
562	-41.987	1.4	434	3	188	1.4						T	8
563	-123.69	0.417	434	3	188		0.417					T	8
564	18.435	0.298	434	3	188			0.298	3.35731	1.39933	T	T	8
565	-86.186	1.661	435	3	189	1.661						M	8
566	0	0.614	435	3	189		0.614					M	8
567	180	0.253	435	3	189			0.253	2.70521	2.42688	M	M	8
568	116.565	0.716	436	3	190	0.716						S	8
569	-149.036	0.573	436	3	190		0.573					S	8
570	11.31	0.566	436	3	190			0.566	1.24956	1.01237	S	S	8
571	135	0.831	437	3	191	0.831						S	8
572	33.69	0.837	437	3	191		0.837					S	8
573	-144.462	0.859	437	3	191			0.859	0.992832	0.974389	S	S	8
574	130.236	1.81	438	3	192	1.81						M	8
575	-135	0.642	438	3	192		0.642					M	8
576	45	0.232	438	3	192			0.232	2.81931	2.76724	M	M	8
577	139.399	1.022	439	3	193	1.022						M	8
578	-135	0.478	439	3	193		0.478					M	8
579	-116.565	0.255	439	3	193			0.255	2.13808	1.87451	M	M	8
580	-60.642	2.036	440	3	194	2.036						T	8
581	-168.69	0.492	440	3	194		0.492					T	8
582	-123.69	0.382	440	3	194			0.382	4.13821	1.28796	T	T	8
583	-17.103	1.483	441	3	195	1.483						T	8
584	-71.565	0.658	441	3	195		0.658					T	8
585	33.69	0.428	441	3	195			0.428	2.2538	1.53738	T	T	8
586	-30.964	1.257	442	3	196	1.257						T	8
587	-135	0.44	442	3	196		0.44					T	8
588	-135	0.453	442	3	196			0.453	2.85682	0.971302	T	T	8
589	0	1.353	443	3	197	1.353						M	8
590	-90	0.907	443	3	197		0.907					M	8
591	-75.964	0.405	443	3	197			0.405	1.49173	2.23951	M	M	8
592	119.745	0.967	444	3	198	0.967						S	8
593	-153.435	0.485	444	3	198		0.485					S	8
594	0	0.391	444	3	198			0.391	1.99381	1.24041	S	S	8
595	106.699	2.221	445	3	199	2.221						M	8
596	0	0.693	445	3	199		0.693					M	8
597	-153.435	0.276	445	3	199			0.276	3.20491	2.51087	M	M	8
598	-85.601	1.304	446	3	200	1.304						M	8
599	165.964	0.485	446	3	200		0.485					M	8
600	26.565	0.239	446	3	200			0.239	2.68866	2.02929	M	M	8
601	-22.62	1.397	447	3	201	1.397						T	8
602	-135	0.449	447	3	201		0.449					T	8
603	-123.69	0.36	447	3	201			0.36	3.11136	1.24722	T	T	8
604	-95.711	1.067	448	3	202	1.067						M	8
605	-168.69	0.579	448	3	202		0.579					M	8
606	0	0.249	448	3	202			0.249	1.84283	2.3253	M	M	8
607	135	2.288	449	3	203	2.288						M	8
608	83.66	0.933	449	3	203		0.933					M	8
609	33.69	0.39	449	3	203			0.39	2.4523	2.39231	M	M	8
610	50.711	1.487	450	3	204	1.487						M	8
611	-45	0.579	450	3	204		0.579					M	8
612	-71.565	0.289	450	3	204			0.289	2.56822	2.00346	M	M	8
613	180	1.814	451	3	205	1.814						T	8
614	-90	0.499	451	3	205		0.499					T	8
615	-90	0.338	451	3	205			0.338	3.63527	1.47633	T	T	8
616	170.538	0.708	452	3	206	0.708						S	8
617	-111.801	0.529	452	3	206		0.529					S	8
618	-90	0.315	452	3	206			0.315	1.33837	1.67937	S	S	8
619	-23.962	1.027	453	3	207	1.027						M	8
620	-99.462	0.635	453	3	207		0.635					M	8
621	56.31	0.365	453	3	207			0.365	1.61732	1.73973	M	M	8
622	-124.992	1.298	454	3	208	1.298						M	8
623	124.992	1.28	454	3	208		1.28					M	8
624	-45	0.311	454	3	208			0.311	1.01406	4.11576	M	M	8
625	-45	1.082	455	3	209	1.082						T	8
626	-120.964	0.608	455	3	209		0.608					T	8
627	53.13	0.494	455	3	209			0.494	1.77961	1.23077	T	T	8
628	164.745	1.182	456	3	210	1.182						T	8
629	-108.435	0.423	456	3	210		0.423					T	8
630	-90	0.345	456	3	210			0.345	2.79433	1.22609	T	T	8
631	149.036	0.525	457	3	211	0.525						S	8
632	-135	0.417	457	3	211		0.417					S	8
633	-104.036	0.383	457	3	211			0.383	1.25899	1.08877	S	S	8
634	157.38	1.38	458	3	212	1.38						T	8
635	-111.801	0.581	458	3	212		0.581					T	8
636	-90	0.517	458	3	212			0.517	2.37522	1.12379	T	T	8
637	-168.69	1.144	459	3	213	1.144						M	8
638	-90	0.587	459	3	213		0.587					M	8
639	-90	0.302	459	3	213			0.302	1.94889	1.94371	M	M	8
640	-141.34	0.697	460	3	214	0.697						S	8
641	143.13	0.555	460	3	214		0.555					S	8
642	108.435	0.383	460	3	214			0.383	1.25586	1.44909	S	S	8
643	-135	0.604	461	3	215	0.604						M	8
644	-45	0.529	461	3	215		0.529					M	8
645	-71.565	0.271	461	3	215			0.271	1.14178	1.95203	M	M	8
646	-38.66	1.972	462	3	216	1.972						M	8
647	75.964	0.849	462	3	216		0.849					M	8
648	-116.565	0.287	462	3	216			0.287	2.32273	2.95819	M	M	8
649	100.305	1.158	463	3	217	1.158						M	8
650	11.31	0.488	463	3	217		0.488					M	8
651	0	0.164	463	3	217			0.164	2.37295	2.97561	M	M	8
652	131.186	1.133	464	3	218	1.133						M	8
653	45	0.365	464	3	218		0.365					M	8
654	63.435	0.189	464	3	218			0.189	3.10411	1.93122	M	M	8
655	146.31	0.74	465	3	219	0.74						M	8
656	-126.87	0.498	465	3	219		0.498					M	8
657	-123.69	0.281	465	3	219			0.281	1.48594	1.77224	M	M	8
658	-57.995	1.09	466	3	220	1.09						T	8
659	45	0.541	466	3	220		0.541					T	8
660	-135	0.321	466	3	220			0.321	2.01479	1.68536	T	T	8
661	-116.565	1.163	467	3	221	1.163						M	8
662	143.13	0.513	467	3	221		0.513					M	8
663	26.565	0.292	467	3	221			0.292	2.26706	1.75685	M	M	8
664	168.69	1.095	468	3	222	1.095						T	8
665	-104.036	0.502	468	3	222		0.502					T	8
666	-123.69	0.394	468	3	222			0.394	2.18127	1.27411	T	T	8
667	158.199	0.62	469	3	223	0.62						S	8
668	-126.87	0.485	469	3	223		0.485					S	8
669	-90	0.38	469	3	223			0.38	1.27835	1.27632	S	S	8
670	-100.305	1.184	470	3	224	1.184						M	8
671	173.66	0.913	470	3	224		0.913					M	8
672	11.31	0.523	470	3	224			0.523	1.29682	1.7457	M	M	8
673	-41.186	2.227	471	3	225	2.227						T	8
674	-128.66	0.642	471	3	225		0.642					T	8
675	56.31	0.427	471	3	225			0.427	3.46885	1.50351	T	T	8
676	55.008	1.342	472	3	226	1.342						M	8
677	-45	0.604	472	3	226		0.604					M	8
678	-45	0.256	472	3	226			0.256	2.22185	2.35938	M	M	8
679	153.435	0.726	473	3	227	0.726						S	8
680	-135	0.402	473	3	227		0.402					S	8
681	-135	0.242	473	3	227			0.242	1.80597	1.66116	S	S	8
682	-65.225	1.535	474	3	228	1.535						T	8
683	-153.435	0.479	474	3	228		0.479					T	8
684	-146.31	0.383	474	3	228			0.383	3.20459	1.25065	T	T	8
685	-50.194	2.486	475	3	229	2.486						T	8
686	-141.34	0.658	475	3	229		0.658					T	8
687	63.435	0.479	475	3	229			0.479	3.77812	1.3737	T	T	8
688	135	1.081	476	3	230	1.081						T	8
689	-146.31	0.421	476	3	230		0.421					T	8
690	18.435	0.318	476	3	230			0.318	2.5677	1.3239	T	T	8
691	-28.072	1.885	477	3	231	1.885						M	8
692	66.801	0.849	477	3	231		0.849					M	8
693	-90	0.384	477	3	231			0.384	2.22026	2.21094	M	M	8
694	-54.162	2.319	478	3	232	2.319						T	8
695	45	0.604	478	3	232		0.604					T	8
696	26.565	0.461	478	3	232			0.461	3.8394	1.3102	T	T	8
697	-77.005	1.423	479	3	233	1.423						T	8
698	21.801	1.163	479	3	233		1.163					T	8
699	-171.87	0.775	479	3	233			0.775	1.22356	1.50065	T	T	8
700	93.576	1.661	480	3	234	1.661						T	8
701	26.565	0.477	480	3	234		0.477					T	8
702	-26.565	0.467	480	3	234			0.467	3.48218	1.02141	T	T	8
703	-48.366	1.291	481	3	235	1.291						M	8
704	53.13	0.517	481	3	235		0.517					M	8
705	26.565	0.292	481	3	235			0.292	2.4971	1.77055	M	M	8
706	-86.424	1.725	482	3	236	1.725						M	8
707	-11.31	0.538	482	3	236		0.538					M	8
708	0	0.311	482	3	236			0.311	3.20632	1.7299	M	M	8
709	135	1.308	483	3	237	1.308						T	8
710	-153.435	0.47	483	3	237		0.47					T	8
711	33.69	0.395	483	3	237			0.395	2.78298	1.18987	T	T	8
712	-78.69	1.628	484	3	238	1.628						M	8
713	11.31	0.545	484	3	238		0.545					M	8
714	0	0.196	484	3	238			0.196	2.98716	2.78061	M	M	8
715	-90	0.998	485	3	239	0.998						M	8
716	-9.462	0.641	485	3	239		0.641					M	8
717	0	0.357	485	3	239			0.357	1.55694	1.79552	M	M	8
718	-71.565	1.737	486	3	240	1.737						M	8
719	20.556	0.9	486	3	240		0.9					M	8
720	0	0.338	486	3	240			0.338	1.93	2.66272	M	M	8
721	-52.125	1.198	487	3	241	1.198						T	8
722	53.13	0.49	487	3	241		0.49					T	8
723	63.435	0.292	487	3	241			0.292	2.4449	1.67808	T	T	8
724	104.744	2.062	488	3	242	2.062						M	8
725	-143.13	1.12	488	3	242		1.12					M	8
726	18.435	0.398	488	3	242			0.398	1.84107	2.81407	M	M	8
727	175.236	1.318	489	3	243	1.318						M	8
728	-96.34	0.951	489	3	243		0.951					M	8
729	-75.964	0.418	489	3	243			0.418	1.38591	2.27512	M	M	8
730	-141.34	0.704	490	3	244	0.704						S	8
731	-36.87	0.523	490	3	244		0.523					S	8
732	-33.69	0.424	490	3	244			0.424	1.34608	1.23349	S	S	8
733	-90	0.997	491	3	245	0.997						M	8
734	0	0.57	491	3	245		0.57					M	8
735	-161.565	0.307	491	3	245			0.307	1.74912	1.85668	M	M	8
736	108.435	2.361	492	3	246	2.361						M	8
737	33.69	0.786	492	3	246		0.786					M	8
738	0	0.409	492	3	246			0.409	3.00382	1.92176	M	M	8
739	-21.038	1.44	493	3	247	1.44						T	8
740	-111.801	0.549	493	3	247		0.549					T	8
741	-123.69	0.36	493	3	247			0.36	2.62295	1.525	T	T	8
742	105.255	1.229	494	3	248	1.229						M	8
743	8.13	0.842	494	3	248		0.842					M	8
744	0	0.412	494	3	248			0.412	1.45962	2.04369	M	M	8
745	-90	1.814	495	3	249	1.814						M	8
746	180	0.588	495	3	249		0.588					M	8
747	180	0.321	495	3	249			0.321	3.08503	1.83178	M	M	8
748	107.354	1.765	496	3	250	1.765						M	8
749	-165.964	0.501	496	3	250		0.501					M	8
750	26.565	0.228	496	3	250			0.228	3.52295	2.19737	M	M	8
751	-140.906	2.272	497	3	251	2.272						M	8
752	-33.69	0.711	497	3	251		0.711					M	8
753	-45	0.263	497	3	251			0.263	3.1955	2.70342	M	M	8
754	164.055	0.811	498	3	252	0.811						S	8
755	-116.565	0.446	498	3	252		0.446					S	8
756	-104.036	0.484	498	3	252			0.484	1.81839	0.921488	S	S	8
757	155.556	1.225	499	3	253	1.225						T	8
758	45	0.353	499	3	253		0.353					T	8
759	63.435	0.271	499	3	253			0.271	3.47025	1.30258	T	T	8
760	136.637	2.678	500	3	254	2.678						T	8
761	-120.964	0.598	500	3	254		0.598					T	8
762	-71.565	0.393	500	3	254			0.393	4.47826	1.52163	T	T	8
763	168.69	0.614	501	3	255	0.614						S	8
764	-90	0.558	501	3	255		0.558					S	8
765	90	0.501	501	3	255			0.501	1.10036	1.11377	S	S	8
766	-49.399	1.022	502	3	256	1.022						T	8
767	53.13	0.528	502	3	256		0.528					T	8
768	56.31	0.415	502	3	256			0.415	1.93561	1.27229	T	T	8
769	-16.699	1.121	503	3	257	1.121						M	8
770	-99.462	0.737	503	3	257		0.737					M	8
771	-108.435	0.328	503	3	257			0.328	1.52103	2.24695	M	M	8
772	135	1.397	504	3	258	1.397						T	8
773	-143.13	0.528	504	3	258		0.528					T	8
774	90	0.357	504	3	258			0.357	2.64583	1.47899	T	T	8
775	-15.255	2.42	505	3	259	2.42						T	8
776	59.036	0.629	505	3	259		0.629					T	8
777	123.69	0.39	505	3	259			0.39	3.84738	1.61282	T	T	8
778	-66.501	2.705	506	3	260	2.705						M	8
779	38.66	0.608	506	3	260		0.608					M	8
780	45	0.242	506	3	260			0.242	4.44901	2.5124	M	M	8
781	140.528	2.341	507	3	261	2.341						T	8
782	123.69	0.42	507	3	261		0.42					T	8
783	71.565	0.363	507	3	261			0.363	5.57381	1.15702	T	T	8
784	-149.534	1.991	508	3	262	1.991						M	8
785	-59.036	0.605	508	3	262		0.605					M	8
786	-45	0.278	508	3	262			0.278	3.29091	2.17626	M	M	8
787	-135	1.66	509	3	263	1.66						T	8
788	-165.964	0.474	509	3	263		0.474					T	8
789	-90	0.587	509	3	263			0.587	3.50211	0.807496	T	T	8
790	-170.538	1.255	510	3	264	1.255						M	8
791	-45	0.922	510	3	264		0.922					M	8
792	-135	0.345	510	3	264			0.345	1.36117	2.67246	M	M	8
793	142.125	1.175	511	3	265	1.175						T	8
794	45	0.44	511	3	265		0.44					T	8
795	-120.964	0.549	511	3	265			0.549	2.67045	0.801457	T	T	8
796	-34.695	1.682	512	3	266	1.682						M	8
797	-105.945	0.755	512	3	266		0.755					M	8
798	-135	0.278	512	3	266			0.278	2.22781	2.71583	M	M	8
799	119.358	1.95	513	3	267	1.95						M	8
800	156.801	0.78	513	3	267		0.78					M	8
801	45	0.303	513	3	267			0.303	2.5	2.57426	M	M	8
802	119.055	1.107	514	3	268	1.107						T	8
803	-146.31	0.43	514	3	268		0.43					T	8
804	-153.435	0.267	514	3	268			0.267	2.57442	1.61049	T	T	8
805	-106.699	1.06	515	3	269	1.06						T	8
806	-26.565	0.45	515	3	269		0.45					T	8
807	0	0.315	515	3	269			0.315	2.35556	1.42857	T	T	8
808	141.34	1.316	516	3	270	1.316						M	8
809	-141.34	0.644	516	3	270		0.644					M	8
810	-123.69	0.311	516	3	270			0.311	2.04348	2.07074	M	M	8
811	-53.13	0.541	517	3	271	0.541						S	8
812	-123.69	0.378	517	3	271		0.378					S	8
813	-135	0.226	517	3	271			0.226	1.43122	1.67257	S	S	8
814	-41.987	1.447	518	3	272	1.447						M	8
815	-126.87	0.534	518	3	272		0.534					M	8
816	-116.565	0.239	518	3	272			0.239	2.70974	2.23431	M	M	8
817	-42.709	1.951	519	3	273	1.951						M	8
818	45	0.467	519	3	273		0.467					M	8
819	-116.565	0.255	519	3	273			0.255	4.17773	1.83137	M	M	8
820	161.565	0.956	520	3	274	0.956						M	8
821	-104.036	0.416	520	3	274		0.416					M	8
822	-116.565	0.242	520	3	274			0.242	2.29808	1.71901	M	M	8
823	132.274	1.553	521	3	275	1.553						M	8
824	35.538	0.897	521	3	275		0.897					M	8
825	26.565	0.267	521	3	275			0.267	1.73133	3.35955	M	M	8
826	-70.017	1.209	522	3	276	1.209						M	8
827	-156.801	0.892	522	3	276		0.892					M	8
828	18.435	0.281	522	3	276			0.281	1.35538	3.17438	M	M	8
829	113.629	1.777	523	3	277	1.777						M	8
830	23.199	0.77	523	3	277		0.77					M	8
831	18.435	0.367	523	3	277			0.367	2.30779	2.09809	M	M	8
832	-146.31	1.144	524	3	278	1.144						M	8
833	-63.435	0.717	524	3	278		0.717					M	8
834	108.435	0.315	524	3	278			0.315	1.59554	2.27619	M	M	8
835	100.008	1.792	525	3	279	1.792						M	8
836	33.69	0.76	525	3	279		0.76					M	8
837	0	0.338	525	3	279			0.338	2.35789	2.24852	M	M	8
838	123.69	1.125	526	3	280	1.125						M	8
839	-158.199	0.614	526	3	280		0.614					M	8
840	45	0.232	526	3	280			0.232	1.83225	2.64655	M	M	8
841	-32.471	1.372	527	3	281	1.372						M	8
842	-135	0.455	527	3	281		0.455					M	8
843	-116.565	0.267	527	3	281			0.267	3.01538	1.70412	M	M	8
844	94.764	1.335	528	3	282	1.335						M	8
845	-9.462	0.67	528	3	282		0.67					M	8
846	-135	0.251	528	3	282			0.251	1.99254	2.66932	M	M	8
847	-41.186	1.094	529	3	283	1.094						M	8
848	-135	0.365	529	3	283		0.365					M	8
849	-135	0.168	529	3	283			0.168	2.99726	2.17262	M	M	8
850	129.806	0.825	530	3	284	0.825						M	8
851	-143.13	0.498	530	3	284		0.498					M	8
852	-135	0.251	530	3	284			0.251	1.65663	1.98406	M	M	8
853	-70.346	1.682	531	3	285	1.682						T	8
854	-168.69	0.483	531	3	285		0.483					T	8
855	-108.435	0.4	531	3	285			0.4	3.4824	1.2075	T	T	8
1	19.179	1.691	532	4	1	1.691						M	4
2	-60.255	0.606	532	4	1		0.606					M	4
3	-63.435	0.302	532	4	1			0.302	2.79043	2.00662	M	M	4
4	-140.194	1.039	533	4	2	1.039						M	4
5	-54.462	0.587	533	4	2		0.587					M	4
6	-45	0.214	533	4	2			0.214	1.77002	2.74299	M	M	4
7	-90	0.651	534	4	3	0.651						M	4
8	180	0.558	534	4	3		0.558					M	4
9	180	0.233	534	4	3			0.233	1.16667	2.39485	M	M	4
10	-140.194	0.578	535	4	4	0.578						S	4
11	135	0.51	535	4	4		0.51					S	4
12	140.194	0.545	535	4	4			0.545	1.13333	0.93578	S	S	4
13	-105.524	1.332	536	4	5	1.332						T	4
14	173.66	0.661	536	4	5		0.661					T	4
15	161.565	0.458	536	4	5			0.458	2.01513	1.44323	T	T	4
16	70.017	2.457	537	4	6	2.457						M	4
17	147.995	0.71	537	4	6		0.71					M	4
18	146.31	0.247	537	4	6			0.247	3.46056	2.87449	M	M	4
19	-86.82	1.282	538	4	7	1.282						M	4
20	-172.875	0.539	538	4	7		0.539					M	4
21	116.565	0.187	538	4	7			0.187	2.37848	2.88235	M	M	4
22	-97.696	2.608	539	4	8	2.608						T	4
23	-156.038	0.707	539	4	8		0.707					T	4
24	-63.435	0.468	539	4	8			0.468	3.68883	1.51068	T	T	4
25	-140.194	0.61	540	4	9	0.61						S	4
26	-45	0.411	540	4	9		0.411					S	4
27	143.13	0.329	540	4	9			0.329	1.48418	1.24924	S	S	4
28	-127.875	0.749	541	4	10	0.749						S	4
29	180	0.326	541	4	10		0.326					S	4
30	-90	0.28	541	4	10			0.28	2.29755	1.16429	S	S	4
31	-117.553	1.851	542	4	11	1.851						M	4
32	146.31	0.51	542	4	11		0.51					M	4
33	153.435	0.291	542	4	11			0.291	3.62941	1.75258	M	M	4
34	-102.653	3.48	543	4	12	3.48						P	4
35	180	0.256	543	4	12		0.256					P	4
36	-33.69	0.239	543	4	12			0.239	13.5938	1.07113	P	P	4
37	80.538	0.826	544	4	13	0.826						M	4
38	180	0.372	544	4	13		0.372					M	4
39	180	0.141	544	4	13			0.141	2.22043	2.6383	M	M	4
40	-92.603	1.535	545	4	14	1.535						M	4
41	-147.995	0.678	545	4	14		0.678					M	4
42	-33.69	0.316	545	4	14			0.316	2.26401	2.14557	M	M	4
43	167.471	0.638	546	4	15	0.638						S	4
44	-99.462	0.401	546	4	15		0.401					S	4
45	-98.13	0.47	546	4	15			0.47	1.59102	0.853191	S	S	4
46	-138.814	0.763	547	4	16	0.763						S	4
47	-40.601	0.676	547	4	16		0.676					S	4
48	-59.036	0.4	547	4	16			0.4	1.1287	1.69	S	S	4
49	-98.13	0.935	548	4	17	0.935						S	4
50	180	0.395	548	4	17		0.395					S	4
51	0	0.233	548	4	17			0.233	2.36709	1.69528	S	S	4
52	95.711	1.451	549	4	18	1.451						M	4
53	180	0.372	549	4	18		0.372					M	4
54	-18.435	0.214	549	4	18			0.214	3.90054	1.73832	M	M	4
55	153.435	1.092	550	4	19	1.092						T	4
56	-135	0.526	550	4	19		0.526					T	4
57	-111.801	0.376	550	4	19			0.376	2.07605	1.39894	T	T	4
58	-132.51	1.153	551	4	20	1.153						T	4
59	165.964	0.306	551	4	20		0.306					T	4
60	-75.964	0.288	551	4	20			0.288	3.76797	1.0625	T	T	4
61	-114.775	1.04	552	4	21	1.04						M	4
62	-18.435	0.662	552	4	21		0.662					M	4
63	-14.036	0.265	552	4	21			0.265	1.571	2.49811	M	M	4
64	-155.225	0.999	553	4	22	0.999						M	4
65	-84.806	0.77	553	4	22		0.77					M	4
66	-71.565	0.39	553	4	22			0.39	1.2974	1.97436	M	M	4
67	69.624	2.656	554	4	23	2.656						M	4
68	-158.199	1.14	554	4	23		1.14					M	4
69	-45	0.197	554	4	23			0.197	2.32982	5.7868	M	M	4
70	-146.31	1.252	555	4	24	1.252						M	4
71	-80.538	0.429	555	4	24		0.429					M	4
72	153.435	0.177	555	4	24			0.177	2.91841	2.42373	M	M	4
73	-98.746	0.914	556	4	25	0.914						M	4
74	-168.69	0.711	556	4	25		0.711					M	4
75	0	0.214	556	4	25			0.214	1.28551	3.32243	M	M	4
76	-135	0.806	557	4	26	0.806						M	4
77	128.66	0.414	557	4	26		0.414					M	4
78	-18.435	0.187	557	4	26			0.187	1.94686	2.2139	M	M	4
79	-158.199	1.494	558	4	27	1.494						T	4
80	-71.565	0.471	558	4	27		0.471					T	4
81	-78.69	0.361	558	4	27			0.361	3.17197	1.30471	T	T	4
82	-143.973	0.963	559	4	28	0.963						S	4
83	-56.31	0.568	559	4	28		0.568					S	4
84	-63.435	0.439	559	4	28			0.439	1.69542	1.29385	S	S	4
85	172.405	1.033	560	4	29	1.033						T	4
86	-113.199	0.544	560	4	29		0.544					T	4
87	-98.13	0.451	560	4	29			0.451	1.8989	1.20621	T	T	4
88	92.49	1.605	561	4	30	1.605						M	4
89	176.186	1.049	561	4	30		1.049					M	4
90	0	0.442	561	4	30			0.442	1.53003	2.3733	M	M	4
91	-131.634	0.823	562	4	31	0.823						S	4
92	-59.036	0.343	562	4	31		0.343					S	4
93	165.964	0.324	562	4	31			0.324	2.39942	1.05864	S	S	4
94	158.962	0.993	563	4	32	0.993						S	4
95	-141.34	0.46	563	4	32		0.46					S	4
96	-99.462	0.398	563	4	32			0.398	2.1587	1.15578	S	S	4
97	-101.31	1.423	564	4	33	1.423						T	4
98	180	0.744	564	4	33		0.744					T	4
99	109.983	0.787	564	4	33			0.787	1.91263	0.945362	T	T	4
100	74.476	2.629	565	4	34	2.629						M	4
101	-172.405	1.056	565	4	34		1.056					M	4
102	143.13	0.323	565	4	34			0.323	2.48958	3.26935	M	M	4
103	-156.801	1.097	566	4	35	1.097						M	4
104	-90	0.837	566	4	35		0.837					M	4
105	-90	0.442	566	4	35			0.442	1.31063	1.89367	M	M	4
106	-126.87	1.46	567	4	36	1.46						T	4
107	128.66	0.471	567	4	36		0.471					T	4
108	-78.69	0.356	567	4	36			0.356	3.09979	1.32303	T	T	4
109	-165.069	1.089	568	4	37	1.089						M	4
110	-63.435	0.957	568	4	37		0.957					M	4
111	-68.199	0.316	568	4	37			0.316	1.13793	3.02848	M	M	4
112	162.897	0.963	569	4	38	0.963						S	4
113	-90	0.352	569	4	38		0.352					S	4
114	-101.31	0.361	569	4	38			0.361	2.7358	0.975069	S	S	4
115	-94.97	1.655	570	4	39	1.655						T	4
116	180	0.421	570	4	39		0.421					T	4
117	0	0.256	570	4	39			0.256	3.93112	1.64453	T	T	4
118	180	0.814	571	4	40	0.814						S	4
119	-98.13	0.49	571	4	40		0.49					S	4
120	-90	0.395	571	4	40			0.395	1.66122	1.24051	S	S	4
121	-45	1.398	572	4	41	1.398						T	4
122	-153.435	0.626	572	4	41		0.626					T	4
123	-135	0.462	572	4	41			0.462	2.23323	1.35498	T	T	4
124	116.565	1.768	573	4	42	1.768						T	4
125	-173.66	0.632	573	4	42		0.632					T	4
126	-116.565	0.499	573	4	42			0.499	2.79747	1.26653	T	T	4
127	52.431	1.154	574	4	43	1.154						T	4
128	-53.13	0.375	574	4	43		0.375					T	4
129	0	0.466	574	4	43			0.466	3.07733	0.804721	T	T	4
130	-101.768	1.705	575	4	44	1.705						T	4
131	0	0.49	575	4	44		0.49					T	4
132	-168.69	0.329	575	4	44			0.329	3.47959	1.48936	T	T	4
133	102.529	0.635	576	4	45	0.635						S	4
134	0	0.465	576	4	45		0.465					S	4
135	-168.69	0.398	576	4	45			0.398	1.36559	1.16834	S	S	4
136	-117.646	1.654	577	4	46	1.654						T	4
137	-33.69	0.291	577	4	46		0.291					T	4
138	165.964	0.324	577	4	46			0.324	5.68385	0.898148	T	T	4
139	-95.711	0.658	578	4	47	0.658						M	4
140	174.289	0.699	578	4	47		0.699					M	4
141	0	0.349	578	4	47			0.349	0.941345	2.00287	M	M	4
142	133.264	1.661	579	4	48	1.661						M	4
143	-123.69	0.516	579	4	48		0.516					M	4
144	45	0.233	579	4	48			0.233	3.21899	2.21459	M	M	4
145	121.759	1.691	580	4	49	1.691						T	4
146	180	0.372	580	4	49		0.372					T	4
147	-104.036	0.28	580	4	49			0.28	4.5457	1.32857	T	T	4
148	144.462	1.219	581	4	50	1.219						T	4
149	-135	0.298	581	4	50		0.298					T	4
150	-143.13	0.335	581	4	50			0.335	4.0906	0.889552	T	T	4
151	-40.601	0.661	582	4	51	0.661						S	4
152	-120.964	0.368	582	4	51		0.368					S	4
153	-143.13	0.335	582	4	51			0.335	1.7962	1.09851	S	S	4
154	36.87	1.763	583	4	52	1.763						M	4
155	131.186	0.691	583	4	52		0.691					M	4
156	-75.964	0.316	583	4	52			0.316	2.55137	2.18671	M	M	4
157	129.289	1.006	584	4	53	1.006						T	4
158	-141.34	0.479	584	4	53		0.479					T	4
159	33.69	0.291	584	4	53			0.291	2.10021	1.64605	T	T	4
160	-60.945	0.69	585	4	54	0.69						S	4
161	-153.435	0.182	585	4	54		0.182					S	4
162	-153.435	0.281	585	4	54			0.281	3.79121	0.647687	S	S	4
163	104.036	2.893	586	4	55	2.893						M	4
164	-171.87	0.514	586	4	55		0.514					M	4
165	-146.31	0.284	586	4	55			0.284	5.6284	1.80986	M	M	4
166	-135	0.707	587	4	56	0.707						S	4
167	141.34	0.419	587	4	56		0.419					S	4
168	-63.435	0.324	587	4	56			0.324	1.68735	1.29321	S	S	4
169	153.435	0.926	588	4	57	0.926						M	4
170	-104.036	0.875	588	4	57		0.875					M	4
171	-120.964	0.407	588	4	57			0.407	1.05829	2.14988	M	M	4
172	-159.444	1.228	589	4	58	1.228						T	4
173	-90	0.535	589	4	58		0.535					T	4
174	-90	0.326	589	4	58			0.326	2.29533	1.6411	T	T	4
175	0	1.07	590	4	59	1.07						M	4
176	-82.875	0.56	590	4	59		0.56					M	4
177	-116.565	0.192	590	4	59			0.192	1.91071	2.91667	M	M	4
178	-84.806	0.75	591	4	60	0.75						S	4
179	-159.444	0.537	591	4	60		0.537					S	4
180	15.945	0.502	591	4	60			0.502	1.39665	1.06972	S	S	4
181	167.005	0.948	592	4	61	0.948						S	4
182	-111.801	0.368	592	4	61		0.368					S	4
183	-105.945	0.502	592	4	61			0.502	2.57609	0.733068	S	S	4
184	130.236	1.221	593	4	62	1.221						T	4
185	-143.13	0.349	593	4	62		0.349					T	4
186	0	0.302	593	4	62			0.302	3.49857	1.15563	T	T	4
187	-161.565	0.649	594	4	63	0.649						S	4
188	-75.964	0.559	594	4	63		0.559					S	4
189	-74.055	0.479	594	4	63			0.479	1.161	1.16701	S	S	4
190	-45	0.921	595	4	64	0.921						S	4
191	-158.199	0.395	595	4	64		0.395					S	4
192	-126.87	0.355	595	4	64			0.355	2.33165	1.11268	S	S	4
193	-19.983	0.86	596	4	65	0.86						S	4
194	-113.199	0.553	596	4	65		0.553					S	4
195	-99.462	0.419	596	4	65			0.419	1.55515	1.31981	S	S	4
196	-173.66	0.632	597	4	66	0.632						S	4
197	-66.038	0.718	597	4	66		0.718					S	4
198	-81.87	0.467	597	4	66			0.467	0.880223	1.53747	S	S	4
199	119.745	0.531	598	4	67	0.531						S	4
200	53.13	0.387	598	4	67		0.387					S	4
201	45	0.296	598	4	67			0.296	1.37209	1.30743	S	S	4
202	105.524	1.281	599	4	68	1.281						T	4
203	34.695	1.077	599	4	68		1.077					T	4
204	-169.695	0.727	599	4	68			0.727	1.18942	1.48143	T	T	4
205	-90	1.721	600	4	69	1.721						M	4
206	180	0.907	600	4	69		0.907					M	4
207	180	0.326	600	4	69			0.326	1.89746	2.78221	M	M	4
208	-55.305	1.116	601	4	70	1.116						M	4
209	41.634	0.806	601	4	70		0.806					M	4
210	-141.34	0.465	601	4	70			0.465	1.38462	1.73333	M	M	4
211	82.875	0.537	602	4	71	0.537						S	4
212	-168.69	0.379	602	4	71		0.379					S	4
213	-171.87	0.49	602	4	71			0.49	1.41689	0.773469	S	S	4
214	144.462	0.651	603	4	72	0.651						M	4
215	-128.66	0.4	603	4	72		0.4					M	4
216	-135	0.2	603	4	72			0.2	1.6275	2	M	M	4
217	15.945	0.479	604	4	73	0.479						S	4
218	-90	0.303	604	4	73		0.303					S	4
219	104.036	0.333	604	4	73			0.333	1.58086	0.90991	S	S	4
220	164.745	0.809	605	4	74	0.809						M	4
221	-90	0.628	605	4	74		0.628					M	4
222	-101.31	0.339	605	4	74			0.339	1.28822	1.85251	M	M	4
223	-45	0.856	606	4	75	0.856						S	4
224	-153.435	0.645	606	4	75		0.645					S	4
225	-129.806	0.535	606	4	75			0.535	1.32713	1.20561	S	S	4
226	139.399	0.614	607	4	76	0.614						S	4
227	51.34	0.429	607	4	76		0.429					S	4
228	-149.036	0.381	607	4	76			0.381	1.43124	1.12598	S	S	4
229	137.121	1.332	608	4	77	1.332						M	4
230	57.995	0.658	608	4	77		0.658					M	4
231	-135	0.313	608	4	77			0.313	2.02432	2.10224	M	M	4
232	135	0.641	609	4	78	0.641						S	4
233	45	0.219	609	4	78		0.219					S	4
234	45	0.164	609	4	78			0.164	2.92694	1.33537	S	S	4
235	-172.875	0.583	610	4	79	0.583						S	4
236	-101.31	0.396	610	4	79		0.396					S	4
237	-68.199	0.361	610	4	79			0.361	1.47222	1.09695	S	S	4
238	-135	1.151	611	4	80	1.151						M	4
239	119.055	0.707	611	4	80		0.707					M	4
240	-80.538	0.406	611	4	80			0.406	1.62801	1.74138	M	M	4
241	37.405	1.484	612	4	81	1.484						M	4
242	-61.928	1.186	612	4	81		1.186					M	4
243	-53.13	0.346	612	4	81			0.346	1.25126	3.42775	M	M	4
244	-169.38	1.095	613	4	82	1.095						T	4
245	-90	0.395	613	4	82		0.395					T	4
246	-26.565	0.291	613	4	82			0.291	2.77215	1.35739	T	T	4
247	-41.634	0.822	614	4	83	0.822						S	4
248	-126.87	0.355	614	4	83		0.355					S	4
249	-116.565	0.303	614	4	83			0.303	2.31549	1.17162	S	S	4
250	-47.726	1.052	615	4	84	1.052						T	4
251	-135	0.396	615	4	84		0.396					T	4
252	-116.565	0.271	615	4	84			0.271	2.65657	1.46125	T	T	4
253	-59.744	0.926	616	4	85	0.926						S	4
254	-129.806	0.545	616	4	85		0.545					S	4
255	8.13	0.497	616	4	85			0.497	1.69908	1.09658	S	S	4
256	127.875	0.825	617	4	86	0.825						M	4
257	-130.601	0.578	617	4	86		0.578					M	4
258	-135	0.298	617	4	86			0.298	1.42734	1.9396	M	M	4
259	128.66	1.326	618	4	87	1.326						T	4
260	-128.66	0.477	618	4	87		0.477					T	4
261	33.69	0.284	618	4	87			0.284	2.77987	1.67958	T	T	4
262	-38.66	0.875	619	4	88	0.875						S	4
263	-150.945	0.718	619	4	88		0.718					S	4
264	56.31	0.523	619	4	88			0.523	1.21866	1.37285	S	S	4
265	-66.801	1.093	620	4	89	1.093						T	4
266	-156.801	0.489	620	4	89		0.489					T	4
267	33.69	0.298	620	4	89			0.298	2.23517	1.64094	T	T	4
268	-75.964	0.853	621	4	90	0.853						S	4
269	168.69	0.31	621	4	90		0.31					S	4
270	45	0.28	621	4	90			0.28	2.75161	1.10714	S	S	4
271	135	1.233	622	4	91	1.233						M	4
272	-118.61	0.874	622	4	91		0.874					M	4
273	-158.199	0.375	622	4	91			0.375	1.41076	2.33067	M	M	4
274	-55.305	2.225	623	4	92	2.225						M	4
275	-130.601	0.641	623	4	92		0.641					M	4
276	33.69	0.219	623	4	92			0.219	3.47114	2.92694	M	M	4
277	-135	1.086	624	4	93	1.086						M	4
278	-45	0.756	624	4	93		0.756					M	4
279	-45	0.396	624	4	93			0.396	1.43651	1.90909	M	M	4
280	98.13	0.493	625	4	94	0.493						S	4
281	180	0.302	625	4	94		0.302					S	4
282	0	0.256	625	4	94			0.256	1.63245	1.17969	S	S	4
283	84.806	0.77	626	4	95	0.77						M	4
284	0	0.698	626	4	95		0.698					M	4
285	-14.036	0.288	626	4	95			0.288	1.10315	2.42361	M	M	4
286	139.399	0.626	627	4	96	0.626						M	4
287	-135	0.444	627	4	96		0.444					M	4
288	33.69	0.247	627	4	96			0.247	1.40991	1.79757	M	M	4
289	127.569	1.163	628	4	97	1.163						M	4
290	40.601	0.628	628	4	97		0.628					M	4
291	-158.199	0.339	628	4	97			0.339	1.85191	1.85251	M	M	4
292	-57.724	1.561	629	4	98	1.561						T	4
293	-170.538	0.444	629	4	98		0.444					T	4
294	-116.565	0.284	629	4	98			0.284	3.51577	1.56338	T	T	4
295	-73.301	0.739	630	4	99	0.739						M	4
296	-161.565	0.441	630	4	99		0.441					M	4
297	-153.435	0.169	630	4	99			0.169	1.67574	2.60947	M	M	4
298	95.711	1.379	631	4	100	1.379						T	4
299	170.538	0.398	631	4	100		0.398					T	4
300	-135	0.444	631	4	100			0.444	3.46482	0.896396	T	T	4
301	151.39	0.885	632	4	101	0.885						S	4
302	59.036	0.419	632	4	101		0.419					S	4
303	45	0.296	632	4	101			0.296	2.11217	1.41554	S	S	4
304	112.62	0.885	633	4	102	0.885						M	4
305	23.199	0.501	633	4	102		0.501					M	4
306	45	0.284	633	4	102			0.284	1.76647	1.76408	M	M	4
307	-65.376	1.811	634	4	103	1.811						M	4
308	30.964	0.806	634	4	103		0.806					M	4
309	-153.435	0.294	634	4	103			0.294	2.2469	2.7415	M	M	4
310	-61.39	0.843	635	4	104	0.843						S	4
311	-141.34	0.429	635	4	104		0.429					S	4
312	23.199	0.499	635	4	104			0.499	1.96503	0.859719	S	S	4
313	90	0.651	636	4	105	0.651						S	4
314	0	0.329	636	4	105		0.329					S	4
315	-161.565	0.449	636	4	105			0.449	1.97872	0.732739	S	S	4
316	102.265	1.633	637	4	106	1.633						M	4
317	-146.31	0.503	637	4	106		0.503					M	4
318	33.69	0.233	637	4	106			0.233	3.24652	2.1588	M	M	4
319	101.31	1.072	638	4	107	1.072						M	4
320	-168.69	0.352	638	4	107		0.352					M	4
321	0	0.147	638	4	107			0.147	3.04545	2.39456	M	M	4
322	118.301	1.019	639	4	108	1.019						T	4
323	-168.69	0.401	639	4	108		0.401					T	4
324	21.801	0.376	639	4	108			0.376	2.54115	1.06649	T	T	4
325	105.524	1.281	640	4	109	1.281						M	4
326	180	0.419	640	4	109		0.419					M	4
327	33.69	0.239	640	4	109			0.239	3.05728	1.75314	M	M	4
328	153.435	0.739	641	4	110	0.739						S	4
329	-90	0.306	641	4	110		0.306					S	4
330	-101.31	0.306	641	4	110			0.306	2.41503	1	S	S	4
331	-42.274	1.086	642	4	111	1.086						M	4
332	-125.538	0.587	642	4	111		0.587					M	4
333	-135	0.214	642	4	111			0.214	1.85009	2.74299	M	M	4
334	-79.992	1.25	643	4	112	1.25						M	4
335	29.055	0.698	643	4	112		0.698					M	4
336	14.036	0.31	643	4	112			0.31	1.79083	2.25161	M	M	4
337	95.906	2.034	644	4	113	2.034						M	4
338	-176.186	1.072	644	4	113		1.072					M	4
339	14.036	0.26	644	4	113			0.26	1.89739	4.12308	M	M	4
340	-29.745	0.555	645	4	114	0.555						S	4
341	-149.036	0.368	645	4	114		0.368					S	4
342	135	0.411	645	4	114			0.411	1.50815	0.895377	S	S	4
343	73.61	1.214	646	4	115	1.214						M	4
344	-41.186	0.744	646	4	115		0.744					M	4
345	-30.964	0.395	646	4	115			0.395	1.63172	1.88354	M	M	4
346	-76.608	1.511	647	4	116	1.511						T	4
347	-158.199	0.743	647	4	116		0.743					T	4
348	180	0.465	647	4	116			0.465	2.03365	1.59785	T	T	4
349	95.711	1.356	648	4	117	1.356						T	4
350	11.31	0.35	648	4	117		0.35					T	4
351	0	0.329	648	4	117			0.329	3.87429	1.06383	T	T	4
352	-123.69	1.006	649	4	118	1.006						T	4
353	-34.992	0.828	649	4	118		0.828					T	4
354	-45	0.806	649	4	118			0.806	1.21498	1.0273	T	T	4
355	-113.199	1.603	650	4	119	1.603						T	4
356	-51.34	0.433	650	4	119		0.433					T	4
357	120.964	0.385	650	4	119			0.385	3.70208	1.12468	T	T	4
358	70.346	2.022	651	4	120	2.022						T	4
359	-59.036	0.427	651	4	120		0.427					T	4
360	0	0.279	651	4	120			0.279	4.73536	1.53047	T	T	4
361	18.435	1.134	652	4	121	1.134						M	4
362	-75.964	0.818	652	4	121		0.818					M	4
363	-75.964	0.283	652	4	121			0.283	1.38631	2.89046	M	M	4
364	-90	0.954	653	4	122	0.954						S	4
365	-146.31	0.542	653	4	122		0.542					S	4
366	-18.435	0.397	653	4	122			0.397	1.76015	1.36524	S	S	4
367	41.424	1.596	654	4	123	1.596						M	4
368	-71.565	0.406	654	4	123		0.406					M	4
369	146.31	0.2	654	4	123			0.2	3.93103	2.03	M	M	4
370	-116.565	0.645	655	4	124	0.645						S	4
371	180	0.512	655	4	124		0.512					S	4
372	-51.34	0.414	655	4	124			0.414	1.25977	1.23671	S	S	4
373	-156.801	0.489	656	4	125	0.489						S	4
374	-69.444	0.566	656	4	125		0.566					S	4
375	-63.435	0.479	656	4	125			0.479	0.863958	1.18163	S	S	4
376	-99.462	0.807	657	4	126	0.807						S	4
377	168.69	0.398	657	4	126		0.398					S	4
378	158.199	0.339	657	4	126			0.339	2.02764	1.17404	S	S	4
379	98.13	1.04	658	4	127	1.04						T	4
380	21.801	0.354	658	4	127		0.354					T	4
381	11.31	0.352	658	4	127			0.352	2.93785	1.00568	T	T	4
1	-95.194	1.182	659	5	1	1.182						T	5
2	-8.13	0.75	659	5	1		0.75					T	5
3	-14.036	0.456	659	5	1			0.456	1.576	1.64474	T	T	5
4	-119.745	0.776	660	5	2	0.776						S	5
5	-33.69	0.443	660	5	2		0.443					S	5
6	-36.87	0.613	660	5	2			0.613	1.75169	0.722675	S	S	5
7	95.711	1.145	661	5	3	1.145						T	5
8	165.964	0.486	661	5	3		0.486					T	5
9	-18.435	0.396	661	5	3			0.396	2.35597	1.22727	T	T	5
10	45	0.772	662	5	4	0.772						S	5
11	-53.13	0.532	662	5	4		0.532					S	5
12	-45	0.321	662	5	4			0.321	1.45113	1.65732	S	S	5
13	70.017	1.216	663	5	5	1.216						M	5
14	161.565	0.668	663	5	5		0.668					M	5
15	0	0.321	663	5	5			0.321	1.82036	2.081	M	M	5
16	-113.962	0.979	664	5	6	0.979						S	5
17	135	0.602	664	5	6		0.602					S	5
18	-18.435	0.357	664	5	6			0.357	1.62625	1.68627	S	S	5
19	-41.987	1.45	665	5	7	1.45						T	5
20	-104.036	0.517	665	5	7		0.517					T	5
21	-90	0.346	665	5	7			0.346	2.80464	1.49422	T	T	5
22	146.31	0.82	666	5	8	0.82						S	5
23	-126.87	0.495	666	5	8		0.495					S	5
24	-123.69	0.466	666	5	8			0.466	1.65657	1.06223	S	S	5
[truncated: 1,632 more rows]
[truncated: 21 more columns]

## Sheet: HE
					SPINES								DENDRITES												1.37778	0.601726	10.7642			496	1.46239	0.734657			172	0.770546	0.479854			363	1.55466	0.467772			11	1042		46.1202	16.9445
Count	Angle	Length	Spine No. (Tot)	Neuron No.	Spine No.	Length	Width	Neck	RATIO L/W	RATIO W/N	TYPE	TYPE!	Neuron No.	Length		Length	Width	Neck	RATIO L/W	RATIO W/N			TYPE!	Neuron No.	Length	Width	Spines/10 mm	Neuron No.	TYPE!	No	Length	Width	Neuron No.	TYPE!	No	Length	Width	Neuron No.	TYPE!	No	Length	Width	Neuron No.	TYPE!		TOT	SPINES	M	S
1	-156.801	1.799	1	1	1	1.799						M	1	37									<>P	1	1.41701	0.633078	12.1466	1	M	41	1.54995	0.777317	1	S	16	0.75225	0.522937	1	T	45	1.53224	0.540822	1	P	0	102	102	40.1961	15.6863
2	-71.565	0.747	1	1	1		0.747					M	1	20.026	Average	1.41939	0.609311	0.35467	2.74674	1.82117			TYPE!	Neuron No.				Neuron No.	TYPE!				Neuron No.	TYPE!				Neuron No.	TYPE!				Neuron No.	TYPE!
3	-71.565	0.376	1	1	1			0.376	2.4083	1.9867	M	M	1	22.19	Std. Dev.	0.598327	0.31336	0.145732	1.53232	0.882561			<>P	2	1.6257	0.633457	10.3253	2	M	78	1.69796	0.714474	2	S	13	0.804462	0.474923	2	T	38	1.75832	0.521395	2	P	4	133	129	60.4651	10.0775
4	-116.565	1.092	2	1	2	1.092						T	1	4.758	Std. Err.	0.0175222	0.00917686	0.00426781	0.0448746	0.0258461			TYPE!	Neuron No.				Neuron No.	TYPE!				Neuron No.	TYPE!				Neuron No.	TYPE!				Neuron No.	TYPE!
5	-26.565	0.524	2	1	2		0.524					T	2	70.04									<>P	3	1.48487	0.647526	7.43537	3	M	37	1.59108	0.769135	3	S	18	0.745389	0.602611	3	T	61	1.63866	0.587016	3	P	2	118	116	31.8966	15.5172
6	0	0.45	2	1	2			0.45	2.08397	1.16444	T	T	2	26.062									TYPE!	Neuron No.				Neuron No.	TYPE!				Neuron No.	TYPE!				Neuron No.	TYPE!				Neuron No.	TYPE!
7	-45	0.57	3	1	3	0.57						M	2	32.708									<>P	4	1.40015	0.571	11.8491	4	M	70	1.51877	0.691071	4	S	22	0.820773	0.451273	4	T	57	1.47809	0.469754	4	P	0	149	149	46.9799	14.7651
8	-126.87	0.577	3	1	3		0.577					M	3	56.683	No of Spines	1166							TYPE!	Neuron No.				Neuron No.	TYPE!				Neuron No.	TYPE!				Neuron No.	TYPE!				Neuron No.	TYPE!
9	-116.565	0.332	3	1	3			0.332	0.987868	1.73795	M	M	3	73.775	No of Neurons	10							<>P	5	0.941653	0.83462	11.8337	5	M	74	0.997365	1.068	5	S	31	0.548161	0.515355	5	T	16	1.44637	0.373813	5	P	1	122	121	61.157	25.6198
10	-26.565	1.24	4	1	4	1.24						T	3	28.243	Tot. Dendrites Length	1096.28							TYPE!	Neuron No.				Neuron No.	TYPE!				Neuron No.	TYPE!				Neuron No.	TYPE!				Neuron No.	TYPE!
11	-135	0.278	4	1	4		0.278					T	4	54.431	Spines per 10 mm	10.636							<>P	6	1.42293	0.573915	8.54263	6	M	28	1.45286	0.661643	6	S	9	0.861222	0.563	6	T	22	1.61464	0.466727	6	P	1	60	59	47.4576	15.2542
12	-135	0.185	4	1	4			0.185	4.46043	1.5027	T	T	4	16.776									TYPE!	Neuron No.				Neuron No.	TYPE!				Neuron No.	TYPE!				Neuron No.	TYPE!				Neuron No.	TYPE!
13	-156.038	1.157	5	1	5	1.157						T	4	12.367		TYPE	TYPE	TYPE	TYPE	TOT	TOT		<>P	7	1.50408	0.545694	11.2768	7	M	77	1.65919	0.65413	7	S	25	0.81008	0.44164	7	T	45	1.62422	0.417956	7	P	3	150	147	52.381	17.0068
14	-75.964	0.55	5	1	5		0.55					T	4	13.707		M	S	T	P		SPINES		TYPE!	Neuron No.				Neuron No.	TYPE!				Neuron No.	TYPE!				Neuron No.	TYPE!				Neuron No.	TYPE!
15	-90	0.508	5	1	5			0.508	2.10364	1.08268	T	T	4	19.669	No	558	193	350	41	1142	1101		<>P	8	1.41893	0.553042	12.1606	8	M	50	1.41736	0.65232	8	S	11	0.834364	0.461636	8	T	34	1.61035	0.436618	8	P	0	95	95	52.6316	11.5789
16	-168.69	0.559	6	1	6	0.559						S	4	8.798	% TOT	0.478559	0.165523	0.300172	0.035163	0.979417	0.964098		TYPE!	Neuron No.				Neuron No.	TYPE!				Neuron No.	TYPE!				Neuron No.	TYPE!				Neuron No.	TYPE!
17	-63.435	0.439	6	1	6		0.439					S	5	35.652	% SPINES	0.506812	0.175295	0.317893		1			<>P	9	1.35167	0.519917	10.7755	9	M	10	1.2588	0.676	9	S	6	0.798	0.369167	9	T	20	1.5642	0.4871	9	P	0	36	36	27.7778	16.6667
18	-90	0.273	6	1	6			0.273	1.27335	1.60806	S	S	5	67.443									TYPE!	Neuron No.				Neuron No.	TYPE!				Neuron No.	TYPE!				Neuron No.	TYPE!				Neuron No.	TYPE!
19	100.305	1.384	7	1	7	1.384						T	6	70.236	Parameter								<>P	10	1.21081	0.505013	11.2958	10	M	31	1.48058	0.682484	10	S	21	0.730762	0.396	10	T	25	1.27952	0.37652	10	P	0	77	77	40.2597	27.2727
20	0	0.508	7	1	7		0.508					T	7	22	RATIO W/N	1.7							TYPE!	Neuron No.				Neuron No.	TYPE!				Neuron No.	TYPE!				Neuron No.	TYPE!				Neuron No.	TYPE!
21	-161.565	0.341	7	1	7			0.341	2.72441	1.48974	T	T	7	13.129	H P	5							<>P	11				11	M				11	S				11	T				11	P
22	164.055	0.881	8	1	8	0.881						M	7	42.154	H M	3							TYPE!						TYPE!					TYPE!					TYPE!					TYPE!
23	-123.69	0.77	8	1	8		0.77					M	7	7.103	H S	1							<>P						M					S					T					P
24	-116.565	0.274	8	1	8			0.274	1.14416	2.81022	M	M	7	18.459									TYPE!						TYPE!					TYPE!					TYPE!					TYPE!
25	-42.51	1.811	9	1	9	1.811						T	7	19.393									<>P						M					S					T					P
26	-135	0.816	9	1	9		0.816					T	7	10.778	#1421	neurons 1-4							TYPE!						TYPE!					TYPE!					TYPE!					TYPE!
27	45	0.718	9	1	9			0.718	2.21936	1.13649	T	T	8	78.121	#1422	neurons 5-7							<>P						M					S					T					P
28	175.914	1.627	10	1	10	1.627						T	9	33.409	#1436	neurons 8-11							TYPE!						TYPE!					TYPE!					TYPE!					TYPE!
29	-90	0.412	10	1	10		0.412					T	10	36.376				Neuron	NECK				<>P						M					S					T					P
30	-90	0.391	10	1	10			0.391	3.94903	1.05371	T	T	10	14.794									TYPE!						TYPE!					TYPE!					TYPE!					TYPE!
31	167.905	1.758	11	1	11	1.758						T	10	4.679				1	0.395284				<>P						M					S					T					P
32	-126.87	0.595	11	1	11		0.595					T	10	12.318	Length	Width	Neck						TYPE!						TYPE!					TYPE!					TYPE!					TYPE!
33	-90	0.373	11	1	11			0.373	2.95462	1.59517	T	T	11	10.398	1.41108	0.617833	0.355546	2	0.338946				<>P						M					S					T					P
34	155.556	1.408	12	1	12	1.408						T	11	24.531	0.599988	0.323948	0.150519						TYPE!						TYPE!					TYPE!					TYPE!					TYPE!
35	-104.036	0.519	12	1	12		0.519					T	11	5.767	1125			3	0.418267				<>P						M					S					T					P
36	-108.435	0.334	12	1	12			0.334	2.71291	1.55389	T	T	11	20.701									TYPE!						TYPE!					TYPE!					TYPE!					TYPE!
37	-45	0.525	13	1	13	0.525						S	11	10.265				4	0.350638				<>P						M					S					T					P
38	-126.87	0.566	13	1	13		0.566					S	11	12.28									TYPE!						TYPE!					TYPE!					TYPE!					TYPE!
39	-143.13	0.598	13	1	13			0.598	0.927562	0.946488	S	S	11	1.588				5	0.412298				<>P						M					S					T					P
40	10.008	2.106	14	1	14	2.106						M	11	15.11									TYPE!						TYPE!					TYPE!					TYPE!					TYPE!
41	-77.471	1.094	14	1	14		1.094					M	11	12.36				6	0.330898				<>P						M					S					T					P
42	-108.435	0.359	14	1	14			0.359	1.92505	3.04735	M	M	12										TYPE!						TYPE!					TYPE!					TYPE!					TYPE!
43	159.444	1.062	15	1	15	1.062						T	12					7	0.304537				<>P						M					S					T					P
44	-123.69	0.45	15	1	15		0.45					T	12
45	-90	0.43	15	1	15			0.43	2.36	1.04651	T	T	12					8	0.315316
46	5.194	1.351	16	1	16	1.351						M	12
47	-71.565	0.704	16	1	16		0.704					M	12					9	0.359722
48	-90	0.41	16	1	16			0.41	1.91903	1.71707	M	M	12
49	-4.086	1.68	17	1	17	1.68						T	12					10	0.311286
50	-90	0.645	17	1	17		0.645					T	12
51	-90	0.391	17	1	17			0.391	2.60465	1.64962	T	T	12					11	0.347989
52	135	0.718	18	1	18	0.718						M	12
53	-126.87	0.58	18	1	18		0.58					M	12
54	-135	0.309	18	1	18			0.309	1.23793	1.87702	M	M	12
55	-19.654	1.735	19	1	19	1.735						M	12
56	-102.529	0.985	19	1	19		0.985					M	12
57	63.435	0.411	19	1	19			0.411	1.76142	2.39659	M	M	12
58	146.31	0.863	20	1	20	0.863						S	12
59	-146.31	0.352	20	1	20		0.352					S	12
60	-123.69	0.348	20	1	20			0.348	2.4517	1.01149	S	S	12
61	-163.301	1.132	21	1	21	1.132						M	12
62	-63.435	0.544	21	1	21		0.544					M	12
63	-90	0.254	21	1	21			0.254	2.08088	2.14173	M	M	12
64	4.764	1.43	22	1	22	1.43						M	12
65	-71.565	0.686	22	1	22		0.686					M	12
66	-90	0.312	22	1	22			0.312	2.08455	2.19872	M	M	12
67	180	1.465	23	1	23	1.465						M	12
68	-108.435	0.791	23	1	23		0.791					M	12
69	-108.435	0.354	23	1	23			0.354	1.85209	2.23446	M	M	12
70	175.914	1.648	24	1	24	1.648						T	12
71	-90	0.547	24	1	24		0.547					T	12
72	-90	0.333	24	1	24			0.333	3.0128	1.64264	T	T	12
73	21.038	1.662	25	1	25	1.662						M	12
74	-75.964	0.488	25	1	25		0.488					M	12
75	-90	0.157	25	1	25			0.157	3.40574	3.10828	M	M	12
76	168.69	0.636	26	1	26	0.636						S	12
77	-116.565	0.229	26	1	26		0.229					S	12
78	-135	0.18	26	1	26			0.18	2.77729	1.27222	S	S	12
79	-140.194	0.915	27	1	27	0.915						S	12
80	-45	0.359	27	1	27		0.359					S	12
81	-56.31	0.412	27	1	27			0.412	2.54875	0.871359	S	S	12
82	-169.38	1.923	28	1	28	1.923						M	12
83	-78.69	0.711	28	1	28		0.711					M	12
84	-90	0.234	28	1	28			0.234	2.70464	3.03846	M	M	12
85	-143.13	0.638	29	1	29	0.638						S	12
86	-45	0.622	29	1	29		0.622					S	12
87	-63.435	0.55	29	1	29			0.55	1.02572	1.13091	S	S	12
88	161.565	1.076	30	1	30	1.076						M	12
89	-104.036	0.533	30	1	30		0.533					M	12
90	-116.565	0.229	30	1	30			0.229	2.01876	2.32751	M	M	12
91	-174.806	1.289	31	1	31	1.289						M	12
92	-90	0.372	31	1	31		0.372					M	12
93	-90	0.215	31	1	31			0.215	3.46505	1.73023	M	M	12
94	175.236	1.352	32	1	32	1.352						M	12
95	-95.711	1.161	32	1	32		1.161					M	12
96	-90	0.356	32	1	32			0.356	1.16451	3.26124	M	M	12
97	-11.889	2.31	33	1	33	2.31						M	12
98	-100.305	1.236	33	1	33		1.236					M	12
99	-104.036	0.512	33	1	33			0.512	1.86893	2.41406	M	M	12
100	174.289	1.156	34	1	34	1.156						T	12
101	-104.036	0.512	34	1	34		0.512					T	12
102	-153.435	0.354	34	1	34			0.354	2.25781	1.44633	T	T	12
103	151.189	2.66	35	1	35	2.66						T	12
104	-161.565	0.696	35	1	35		0.696					T	12
105	-104.036	0.519	35	1	35			0.519	3.82184	1.34104	T	T	12
106	7.125	1.864	36	1	36	1.864						T	12
107	-141.34	0.732	36	1	36		0.732					T	12
108	-90	0.439	36	1	36			0.439	2.54645	1.66743	T	T	12
109	0	1.555	37	1	37	1.555						T	12
110	-111.801	0.631	37	1	37		0.631					T	12
111	-90	0.391	37	1	37			0.391	2.46434	1.61381	T	T	12
112	48.366	1.492	38	1	38	1.492						T	12
113	-33.69	0.512	38	1	38		0.512					T	12
114	-90	0.557	38	1	38			0.557	2.91406	0.91921	T	T	12
115	157.38	1.469	39	1	39	1.469						T	12
116	-105.945	0.909	39	1	39		0.909					T	12
117	-101.31	0.612	39	1	39			0.612	1.61606	1.48529	T	T	12
118	-171.254	1.537	40	1	40	1.537						T	12
119	-90	0.587	40	1	40		0.587					T	12
120	-90	0.469	40	1	40			0.469	2.6184	1.2516	T	T	12
121	176.634	1.994	41	1	41	1.994						M	12
122	-97.125	0.967	41	1	41		0.967					M	12
123	-90	0.381	41	1	41			0.381	2.06205	2.53806	M	M	12
124	-29.745	0.985	42	1	42	0.985						S	12
125	-108.435	0.398	42	1	42		0.398					S	12
126	-116.565	0.288	42	1	42			0.288	2.47487	1.38194	S	S	12
127	-17.103	1.606	43	1	43	1.606						T	12
128	-128.66	0.838	43	1	43		0.838					T	12
129	-111.801	0.584	43	1	43			0.584	1.91647	1.43493	T	T	12
130	139.399	1.017	44	1	44	1.017						T	12
131	-126.87	0.56	44	1	44		0.56					T	12
132	-146.31	0.435	44	1	44			0.435	1.81607	1.28736	T	T	12
133	-174.806	1.326	45	1	45	1.326						M	12
134	-104.036	0.974	45	1	45		0.974					M	12
135	-104.036	0.506	45	1	45			0.506	1.3614	1.9249	M	M	12
136	-53.13	0.664	46	1	46	0.664						S	12
137	18.435	0.446	46	1	46		0.446					S	12
138	-146.31	0.342	46	1	46			0.342	1.48879	1.30409	S	S	12
139	27.897	2.227	47	1	47	2.227						M	12
140	-45	0.684	47	1	47		0.684					M	12
141	-90	0.356	47	1	47			0.356	3.25585	1.92135	M	M	12
142	45	1.367	48	1	48	1.367						T	12
143	-53.13	0.586	48	1	48		0.586					T	12
144	-45	0.373	48	1	48			0.373	2.33276	1.57105	T	T	12
145	-153.435	1.637	49	1	49	1.637						T	12
146	-68.199	0.621	49	1	49		0.621					T	12
147	-90	0.616	49	1	49			0.616	2.63607	1.00812	T	T	12
148	-9.462	1.408	50	1	50	1.408						M	12
149	-116.565	0.786	50	1	50		0.786					M	12
150	-90	0.381	50	1	50			0.381	1.79135	2.06299	M	M	12
151	-153.435	0.996	51	1	51	0.996						S	12
152	-54.462	0.902	51	1	51		0.902					S	12
153	-59.036	0.618	51	1	51			0.618	1.10421	1.45955	S	S	12
154	-176.82	2.116	52	1	52	2.116						T	12
155	-90	0.499	52	1	52		0.499					T	12
156	-71.565	0.385	52	1	52			0.385	4.24048	1.2961	T	T	12
157	-159.444	1.029	53	1	53	1.029						T	12
158	-90	0.264	53	1	53		0.264					T	12
159	-63.435	0.288	53	1	53			0.288	3.89773	0.916667	T	T	12
160	73.301	1.223	54	1	54	1.223						M	12
161	-29.745	0.894	54	1	54		0.894					M	12
162	-33.69	0.435	54	1	54			0.435	1.36801	2.05517	M	M	12
163	-158.199	0.629	55	1	55	0.629						S	12
164	-90	0.56	55	1	55		0.56					S	12
165	-71.565	0.398	55	1	55			0.398	1.12321	1.40704	S	S	12
166	-156.801	1.743	56	1	56	1.743						T	12
167	-90	0.385	56	1	56		0.385					T	12
168	-78.69	0.547	56	1	56			0.547	4.52727	0.703839	T	T	12
169	180	0.762	57	1	57	0.762						S	12
170	-90	0.615	57	1	57		0.615					S	12
171	-90	0.381	57	1	57			0.381	1.23902	1.61417	S	S	12
172	171.87	1.657	58	1	58	1.657						M	12
173	-110.556	1.029	58	1	58		1.029					M	12
174	-90	0.353	58	1	58			0.353	1.6103	2.91501	M	M	12
175	-156.038	1.219	59	1	59	1.219						M	12
176	-45	1.057	59	1	59		1.057					M	12
177	-90	0.324	59	1	59			0.324	1.15326	3.26235	M	M	12
178	-141.843	2.082	60	1	60	2.082						T	12
179	-45	0.563	60	1	60		0.563					T	12
180	135	0.414	60	1	60			0.414	3.69805	1.3599	T	T	12
181	-113.199	0.812	61	1	61	0.812						S	12
182	-14.036	0.991	61	1	61		0.991					S	12
183	170.538	0.732	61	1	61			0.732	0.819374	1.35383	S	S	12
184	-165.069	1.77	62	1	62	1.77						M	12
185	-74.055	0.853	62	1	62		0.853					M	12
186	-90	0.498	62	1	62			0.498	2.07503	1.71285	M	M	12
187	-172.875	1.893	63	1	63	1.893						T	12
188	-90	0.527	63	1	63		0.527					T	12
189	-104.036	0.408	63	1	63			0.408	3.59203	1.29167	T	T	12
190	22.38	2.089	64	1	64	2.089						T	12
191	-63.435	0.512	64	1	64		0.512					T	12
192	-90	0.382	64	1	64			0.382	4.08008	1.34031	T	T	12
193	28.61	1.52	65	1	65	1.52						M	12
194	-80.538	0.793	65	1	65		0.793					M	12
195	-90	0.41	65	1	65			0.41	1.91677	1.93415	M	M	12
196	-111.801	1.279	66	1	66	1.279						T	12
197	14.036	0.53	66	1	66		0.53					T	12
198	-75.964	0.398	66	1	66			0.398	2.41321	1.33166	T	T	12
199	23.962	1.166	67	1	67	1.166						T	12
200	-48.814	1.202	67	1	67		1.202					T	12
201	-81.87	0.817	67	1	67			0.817	0.97005	1.47124	T	T	12
202	0	1.143	68	1	68	1.143						T	12
203	63.435	0.485	68	1	68		0.485					T	12
204	-90	0.293	68	1	68			0.293	2.3567	1.65529	T	T	12
205	-90	1.758	69	1	69	1.758						T	12
206	36.87	0.668	69	1	69		0.668					T	12
207	-80.538	0.626	69	1	69			0.626	2.63174	1.06709	T	T	12
208	-131.186	1.245	70	1	70	1.245						T	12
209	-56.31	0.504	70	1	70		0.504					T	12
210	-71.565	0.446	70	1	70			0.446	2.47024	1.13004	T	T	12
211	-158.199	1.269	71	1	71	1.269						T	12
212	-63.435	0.528	71	1	71		0.528					T	12
213	-90	0.41	71	1	71			0.41	2.40341	1.2878	T	T	12
214	-109.983	1.436	72	1	72	1.436						T	12
215	-165.964	0.414	72	1	72		0.414					T	12
216	-18.435	0.371	72	1	72			0.371	3.4686	1.1159	T	T	12
217	-153.435	0.528	73	1	73	0.528						S	12
218	-45	0.334	73	1	73		0.334					S	12
219	-71.565	0.381	73	1	73			0.381	1.58084	0.87664	S	S	12
220	-168.69	1.827	74	1	74	1.827						T	12
221	-90	0.414	74	1	74		0.414					T	12
222	-108.435	0.398	74	1	74			0.398	4.41304	1.0402	T	T	12
223	0	0.879	75	1	75	0.879						S	12
224	-90	0.44	75	1	75		0.44					S	12
225	-90	0.381	75	1	75			0.381	1.99773	1.15486	S	S	12
226	0	1.321	76	1	76	1.321						T	12
227	-104.036	0.472	76	1	76		0.472					T	12
228	-90	0.498	76	1	76			0.498	2.79873	0.947791	T	T	12
229	16.928	2.798	77	1	77	2.798						M	12
230	-50.194	0.855	77	1	77		0.855					M	12
231	-56.31	0.367	77	1	77			0.367	3.27251	2.3297	M	M	12
232	-171.254	1.599	78	1	78	1.599						M	12
233	-80.538	0.804	78	1	78		0.804					M	12
234	-90	0.324	78	1	78			0.324	1.98881	2.48148	M	M	12
235	82.405	1.84	79	1	79	1.84						M	12
236	168.69	0.597	79	1	79		0.597					M	12
237	0	0.322	79	1	79			0.322	3.08208	1.85404	M	M	12
238	-164.745	1.297	80	1	80	1.297						M	12
239	-77.471	1.052	80	1	80		1.052					M	12
240	-75.964	0.473	80	1	80			0.473	1.23289	2.2241	M	M	12
241	172.875	2.863	81	1	81	2.863						T	12
242	-116.565	0.528	81	1	81		0.528					T	12
243	-90	0.41	81	1	81			0.41	5.42235	1.2878	T	T	12
244	-150.255	0.959	82	1	82	0.959						S	12
245	-63.435	0.472	82	1	82		0.472					S	12
246	-56.31	0.512	82	1	82			0.512	2.03178	0.921875	S	S	12
247	0	0.791	83	1	83	0.791						M	12
248	-90	0.879	83	1	83		0.879					M	12
249	-90	0.382	83	1	83			0.382	0.899886	2.30105	M	M	12
250	-128.66	0.686	84	1	84	0.686						S	12
251	-45	0.642	84	1	84		0.642					S	12
252	-45	0.477	84	1	84			0.477	1.06854	1.34591	S	S	12
253	165.964	1.052	85	1	85	1.052						T	12
254	-123.69	0.488	85	1	85		0.488					T	12
255	-90	0.41	85	1	85			0.41	2.15574	1.19024	T	T	12
256	64.799	2.201	86	1	86	2.201						M	12
257	-29.745	0.967	86	1	86		0.967					M	12
258	0	0.439	86	1	86			0.439	2.27611	2.20273	M	M	12
259	71.565	1.427	87	1	87	1.427						M	12
260	-26.565	0.435	87	1	87		0.435					M	12
261	153.435	0.25	87	1	87			0.25	3.28046	1.74	M	M	12
262	-144.462	0.938	88	1	88	0.938						M	12
263	-63.435	0.528	88	1	88		0.528					M	12
264	135	0.293	88	1	88			0.293	1.77652	1.80205	M	M	12
265	45	1.326	89	1	89	1.326						T	12
266	-63.435	0.447	89	1	89		0.447					T	12
267	-45	0.375	89	1	89			0.375	2.96644	1.192	T	T	12
268	-139.764	1.929	90	1	90	1.929						M	12
269	-63.435	0.814	90	1	90		0.814					M	12
270	-45	0.353	90	1	90			0.353	2.36978	2.30595	M	M	12
271	180	1.379	91	1	91	1.379						M	12
272	-111.801	0.631	91	1	91		0.631					M	12
273	-90	0.324	91	1	91			0.324	2.18542	1.94753	M	M	12
274	132.709	2.073	92	1	92	2.073						M	12
275	-135	0.48	92	1	92		0.48					M	12
276	-153.435	0.236	92	1	92			0.236	4.31875	2.0339	M	M	12
277	-12.529	1.109	93	1	93	1.109						T	12
278	-90	0.294	93	1	93		0.294					T	12
279	-90	0.299	93	1	93			0.299	3.77211	0.983278	T	T	12
280	102.995	1.585	94	1	94	1.585						T	12
281	-153.435	0.472	94	1	94		0.472					T	12
282	-161.565	0.391	94	1	94			0.391	3.35805	1.20716	T	T	12
283	-142.125	1.383	95	1	95	1.383						T	12
284	-56.31	0.375	95	1	95		0.375					T	12
285	-90	0.27	95	1	95			0.27	3.688	1.38889	T	T	12
286	-165.069	1.762	96	1	96	1.762						M	12
287	-90	0.908	96	1	96		0.908					M	12
288	-71.565	0.334	96	1	96			0.334	1.94053	2.71856	M	M	12
289	158.962	1.665	97	1	97	1.665						M	12
290	-90	0.644	97	1	97		0.644					M	12
291	-153.435	0.288	97	1	97			0.288	2.5854	2.23611	M	M	12
292	0	1.583	98	1	98	1.583						T	12
293	-90	0.324	98	1	98		0.324					T	12
294	-108.435	0.315	98	1	98			0.315	4.8858	1.02857	T	T	12
295	-163.61	2.012	99	1	99	2.012						M	12
296	-66.801	0.982	99	1	99		0.982					M	12
297	-90	0.353	99	1	99			0.353	2.04888	2.78187	M	M	12
298	18.435	1.427	100	1	100	1.427						T	12
299	-90	0.414	100	1	100		0.414					T	12
300	-90	0.293	100	1	100			0.293	3.44686	1.41297	T	T	12
301	41.987	1.636	101	1	101	1.636						M	12
302	-63.435	0.739	101	1	101		0.739					M	12
303	-75.964	0.426	101	1	101			0.426	2.2138	1.73474	M	M	12
304	40.601	1.058	102	1	102	1.058						M	12
305	126.87	0.539	102	1	102		0.539					M	12
306	-63.435	0.299	102	1	102			0.299	1.96289	1.80268	M	M	12
1	-116.565	1.061	103	2	1	1.061						T	12
2	-45	0.379	103	2	1		0.379					T	12
3	0	0.257	103	2	1			0.257	2.79947	1.47471	T	T	12
4	-72.121	2.236	104	2	2	2.236						M	12
5	0	0.908	104	2	2		0.908					M	12
6	-153.435	0.2	104	2	2			0.2	2.46256	4.54	M	M	12
7	4.764	1.656	105	2	3	1.656						M	12
8	82.875	0.57	105	2	3		0.57					M	12
9	-90	0.302	105	2	3			0.302	2.90526	1.88742	M	M	12
10	-93.366	1.213	106	2	4	1.213						M	12
11	-41.634	0.872	106	2	4		0.872					M	12
12	-158.199	0.316	106	2	4			0.316	1.39106	2.75949	M	M	12
13	100.62	1.132	107	2	5	1.132						T	12
14	0	0.443	107	2	5		0.443					T	12
15	0	0.421	107	2	5			0.421	2.5553	1.05226	T	T	12
16	-92.203	1.816	108	2	6	1.816						M	12
17	18.435	0.869	108	2	6		0.869					M	12
18	0	0.395	108	2	6			0.395	2.08976	2.2	M	M	12
19	105.524	1.343	109	2	7	1.343						T	12
20	-146.31	0.523	109	2	7		0.523					T	12
21	0	0.349	109	2	7			0.349	2.56788	1.49857	T	T	12
22	-19.44	1.244	110	2	8	1.244						M	12
23	-116.565	0.626	110	2	8		0.626					M	12
24	56.31	0.265	110	2	8			0.265	1.98722	2.36226	M	M	12
25	-30.579	1.783	111	2	9	1.783						M	12
26	-111.038	0.981	111	2	9		0.981					M	12
27	-141.34	0.433	111	2	9			0.433	1.81753	2.26559	M	M	12
28	110.323	2.031	112	2	10	2.031						M	12
29	29.055	0.698	112	2	10		0.698					M	12
30	30.964	0.406	112	2	10			0.406	2.90974	1.71921	M	M	12
31	-108.435	1.295	113	2	11	1.295						M	12
32	168.69	0.722	113	2	11		0.722					M	12
33	180	0.395	113	2	11			0.395	1.79363	1.82785	M	M	12
34	-109.983	0.855	114	2	12	0.855						S	12
35	-26.565	0.603	114	2	12		0.603					S	12
36	0	0.536	114	2	12			0.536	1.41791	1.125	S	S	12
37	68.629	1.694	115	2	13	1.694						T	12
38	135	0.296	115	2	13		0.296					T	12
39	0	0.279	115	2	13			0.279	5.72297	1.06093	T	T	12
40	-72.897	0.956	116	2	14	0.956						M	12
41	20.556	0.633	116	2	14		0.633					M	12
42	-153.435	0.312	116	2	14			0.312	1.51027	2.02885	M	M	12
43	-142.125	0.808	117	2	15	0.808						M	12
44	-54.462	0.596	117	2	15		0.596					M	12
45	-21.801	0.324	117	2	15			0.324	1.3557	1.83951	M	M	12
46	-81.254	0.892	118	2	16	0.892						M	12
47	14.036	0.598	118	2	16		0.598					M	12
48	180	0.327	118	2	16			0.327	1.49164	1.82875	M	M	12
49	-104.036	2.059	119	2	17	2.059						T	12
50	-171.87	0.474	119	2	17		0.474					T	12
51	-30.964	0.387	119	2	17			0.387	4.34388	1.22481	T	T	12
52	139.399	1.305	120	2	18	1.305						M	12
53	-140.194	1.12	120	2	18		1.12					M	12
54	-135	0.477	120	2	18			0.477	1.16518	2.34801	M	M	12
55	-73.856	2.716	121	2	19	2.716						T	12
56	-168.69	0.402	121	2	19		0.402					T	12
57	-126.87	0.298	121	2	19			0.298	6.75622	1.34899	T	T	12
58	86.906	2.539	122	2	20	2.539						M	12
59	171.254	0.918	122	2	20		0.918					M	12
60	180	0.186	122	2	20			0.186	2.7658	4.93548	M	M	12
61	120.069	1.509	123	2	21	1.509						M	12
62	-162.897	0.905	123	2	21		0.905					M	12
63	-161.565	0.419	123	2	21			0.419	1.6674	2.1599	M	M	12
64	-139.086	1.35	124	2	22	1.35						M	12
65	-56.31	0.987	124	2	22		0.987					M	12
66	-50.194	0.559	124	2	22			0.559	1.36778	1.76565	M	M	12
67	51.633	2.118	125	2	23	2.118						M	12
68	-32.005	0.69	125	2	23		0.69					M	12
69	-33.69	0.247	125	2	23			0.247	3.06957	2.79352	M	M	12
70	66.571	2.273	126	2	24	2.273						M	12
71	161.565	0.428	126	2	24		0.428					M	12
72	0	0.234	126	2	24			0.234	5.31075	1.82906	M	M	12
73	-135	0.955	127	2	25	0.955						S	12
74	-45	0.527	127	2	25		0.527					S	12
75	-30.964	0.407	127	2	25			0.407	1.81214	1.29484	S	S	12
76	66.801	2.166	128	2	26	2.166						T	12
77	-18.435	0.441	128	2	26		0.441					T	12
78	0	0.279	128	2	26			0.279	4.91156	1.58065	T	T	12
79	88.21	2.213	129	2	27	2.213						M	12
80	161.565	0.92	129	2	27		0.92					M	12
81	-18.435	0.257	129	2	27			0.257	2.40543	3.57977	M	M	12
82	-115.346	1.436	130	2	28	1.436						M	12
83	165.964	0.559	130	2	28		0.559					M	12
84	165.964	0.272	130	2	28			0.272	2.56887	2.05515	M	M	12
85	99.728	2.451	131	2	29	2.451						M	12
86	0	0.582	131	2	29		0.582					M	12
87	-165.964	0.283	131	2	29			0.283	4.21134	2.05654	M	M	12
88	-107.65	1.567	132	2	30	1.567						T	12
89	-45	0.543	132	2	30		0.543					T	12
90	180	0.327	132	2	30			0.327	2.88582	1.66055	T	T	12
91	124.992	1.685	133	2	31	1.685						M	12
92	36.87	0.671	133	2	31		0.671					M	12
93	-158.199	0.368	133	2	31			0.368	2.51118	1.82337	M	M	12
94	109.654	1.03	134	2	32	1.03						M	12
95	-164.055	0.537	134	2	32		0.537					M	12
96	14.036	0.26	134	2	32			0.26	1.91806	2.06538	M	M	12
97	59.534	1.356	135	2	33	1.356						T	12
98	167.905	0.999	135	2	33		0.999					T	12
99	156.038	0.687	135	2	33			0.687	1.35736	1.45415	T	T	12
100	-124.992	0.865	136	2	34	0.865						S	12
101	143.13	0.298	136	2	34		0.298					S	12
102	-18.435	0.219	136	2	34			0.219	2.90268	1.36073	S	S	12
103	-125.538	2.439	137	2	35	2.439						M	12
104	146.31	0.549	137	2	35		0.549					M	12
105	-18.435	0.214	137	2	35			0.214	4.44262	2.56542	M	M	12
106	-109.654	1.023	138	2	36	1.023						T	12
107	161.565	0.457	138	2	36		0.457					T	12
108	0	0.279	138	2	36			0.279	2.23851	1.63799	T	T	12
109	-103.134	2.127	139	2	37	2.127						M	12
110	156.801	0.531	139	2	37		0.531					M	12
111	-14.036	0.26	139	2	37			0.26	4.00565	2.04231	M	M	12
112	-90	0.745	140	2	38	0.745						S	12
113	180	0.28	140	2	38		0.28					S	12
114	-158.199	0.416	140	2	38			0.416	2.66071	0.673077	S	S	12
115	74.745	1.604	141	2	39	1.604						T	12
116	-21.801	0.428	141	2	39		0.428					T	12
117	180	0.279	141	2	39			0.279	3.74766	1.53405	T	T	12
118	107.354	1.155	142	2	40	1.155						M	12
119	-146.31	0.543	142	2	40		0.543					M	12
120	0	0.283	142	2	40			0.283	2.12707	1.91873	M	M	12
121	-135	1.859	143	2	41	1.859						T	12
122	-63.435	0.499	143	2	41		0.499					T	12
123	165.964	0.339	143	2	41			0.339	3.72545	1.47198	T	T	12
124	119.197	2.77	144	2	42	2.77						M	12
125	-124.992	0.917	144	2	42		0.917					M	12
126	0	0.419	144	2	42			0.419	3.02072	2.18854	M	M	12
127	73.496	1.935	145	2	43	1.935						M	12
128	180	0.558	145	2	43		0.558					M	12
129	0	0.233	145	2	43			0.233	3.46774	2.39485	M	M	12
130	-151.699	2.07	146	2	44	2.07						M	12
131	-94.086	1.026	146	2	44		1.026					M	12
132	-63.435	0.333	146	2	44			0.333	2.01754	3.08108	M	M	12
133	63.435	1.717	147	2	45	1.717						M	12
134	95.711	0.727	147	2	45		0.727					M	12
135	-168.69	0.375	147	2	45			0.375	2.36176	1.93867	M	M	12
136	-148.392	1.073	148	2	46	1.073						T	12
137	-45	0.382	148	2	46		0.382					T	12
138	-56.31	0.251	148	2	46			0.251	2.8089	1.52191	T	T	12
139	-113.429	2.303	149	2	47	2.303						M	12
140	-5.711	0.704	149	2	47		0.704					M	12
141	-18.435	0.229	149	2	47			0.229	3.27131	3.07424	M	M	12
142	-102.265	1.638	150	2	48	1.638						M	12
143	172.875	0.607	150	2	48		0.607					M	12
144	-14.036	0.234	150	2	48			0.234	2.69852	2.59402	M	M	12
145	106.26	1.707	151	2	49	1.707						M	12
146	-147.529	0.886	151	2	49		0.886					M	12
147	0	0.233	151	2	49			0.233	1.92664	3.80258	M	M	12
148	65.854	2.27	152	2	50	2.27						M	12
149	114.775	0.999	152	2	50		0.999					M	12
150	180	0.535	152	2	50			0.535	2.27227	1.86729	M	M	12
151	16.39	1.202	153	2	51	1.202						M	12
152	-75.964	0.575	153	2	51		0.575					M	12
153	-63.435	0.291	153	2	51			0.291	2.09043	1.97595	M	M	12
154	104.036	0.548	154	2	52	0.548						S	12
155	8.13	0.514	154	2	52		0.514					S	12
156	-170.538	0.402	154	2	52			0.402	1.06615	1.27861	S	S	12
157	-84.289	0.701	155	2	53	0.701						M	12
158	8.746	0.876	155	2	53		0.876					M	12
159	14.036	0.288	155	2	53			0.288	0.800228	3.04167	M	M	12
160	-62.65	2.32	156	2	54	2.32						M	12
161	38.66	1.355	156	2	54		1.355					M	12
162	-168.69	0.375	156	2	54			0.375	1.71218	3.61333	M	M	12
163	-52.431	1.126	157	2	55	1.126						M	12
164	49.399	0.609	157	2	55		0.609					M	12
165	180	0.303	157	2	55			0.303	1.84893	2.0099	M	M	12
166	95.711	4.93	158	2	56	4.93						P	12
167	0	0.558	158	2	56		0.558					P	12
168	153.435	0.188	158	2	56			0.188	8.83513	2.96809	P	P	12
169	82.875	0.56	159	2	57	0.56						M	12
170	180	0.489	159	2	57		0.489					M	12
171	180	0.28	159	2	57			0.28	1.14519	1.74643	M	M	12
172	113.199	2.074	160	2	58	2.074						M	12
173	-139.399	0.593	160	2	58		0.593					M	12
174	-146.31	0.28	160	2	58			0.28	3.49747	2.11786	M	M	12
175	-138.366	0.858	161	2	59	0.858						S	12
176	144.462	0.6	161	2	59		0.6					S	12
177	0	0.489	161	2	59			0.489	1.43	1.22699	S	S	12
178	124.992	0.858	162	2	60	0.858						S	12
179	-149.036	0.802	162	2	60		0.802					S	12
180	-165.964	0.566	162	2	60			0.566	1.06983	1.41696	S	S	12
181	-92.862	1.419	163	2	61	1.419						M	12
182	7.125	0.517	163	2	61		0.517					M	12
183	180	0.303	163	2	61			0.303	2.74468	1.70627	M	M	12
184	-49.635	1.865	164	2	62	1.865						M	12
185	35.538	0.563	164	2	62		0.563					M	12
186	45	0.284	164	2	62			0.284	3.31261	1.98239	M	M	12
187	-114.228	1.543	165	2	63	1.543						T	12
188	153.435	0.471	165	2	63		0.471					T	12
189	-45	0.444	165	2	63			0.444	3.27601	1.06081	T	T	12
190	-40.236	1.141	166	2	64	1.141						M	12
191	53.973	0.942	166	2	64		0.942					M	12
192	-126.87	0.368	166	2	64			0.368	1.21125	2.55978	M	M	12
193	104.931	1.055	167	2	65	1.055						M	12
194	-131.634	0.856	167	2	65		0.856					M	12
195	36.87	0.316	167	2	65			0.316	1.23248	2.70886	M	M	12
196	100.008	1.228	168	2	66	1.228						T	12
197	0	0.283	168	2	66		0.283					T	12
198	0	0.233	168	2	66			0.233	4.33922	1.21459	T	T	12
199	-45	0.954	169	2	67	0.954						M	12
200	18.435	0.678	169	2	67		0.678					M	12
201	-146.31	0.233	169	2	67			0.233	1.40708	2.90987	M	M	12
202	144.462	0.594	170	2	68	0.594						S	12
203	-128.66	0.433	170	2	68		0.433					S	12
204	-116.565	0.291	170	2	68			0.291	1.37182	1.48797	S	S	12
205	115.346	1.488	171	2	69	1.488						M	12
206	9.462	0.853	171	2	69		0.853					M	12
207	-135	0.099	171	2	69			0.099	1.74443	8.61616	M	M	12
208	-21.038	1.944	172	2	70	1.944						T	12
209	53.13	0.316	172	2	70		0.316					T	12
210	-90	0.237	172	2	70			0.237	6.1519	1.33333	T	T	12
211	126.027	0.941	173	2	71	0.941						S	12
212	-153.435	0.479	173	2	71		0.479					S	12
213	-153.435	0.343	173	2	71			0.343	1.96451	1.3965	S	S	12
214	0	1.652	174	2	72	1.652						M	12
215	-105.945	0.548	174	2	72		0.548					M	12
216	-116.565	0.147	174	2	72			0.147	3.0146	3.72789	M	M	12
217	12.529	1.287	175	2	73	1.287						T	12
218	-81.87	0.489	175	2	73		0.489					T	12
219	-45	0.379	175	2	73			0.379	2.6319	1.29024	T	T	12
220	173.29	1.192	176	2	74	1.192						T	12
221	-96.34	0.655	176	2	74		0.655					T	12
222	-120.964	0.407	176	2	74			0.407	1.81985	1.60934	T	T	12
223	49.635	1.85	177	2	75	1.85						M	12
224	-30.964	0.452	177	2	75		0.452					M	12
225	123.69	0.247	177	2	75			0.247	4.09292	1.82996	M	M	12
226	106.699	0.751	178	2	76	0.751						M	12
227	180	0.605	178	2	76		0.605					M	12
228	-126.87	0.349	178	2	76			0.349	1.24132	1.73352	M	M	12
229	163.686	2.952	179	2	77	2.952						T	12
230	-116.565	0.458	179	2	77		0.458					T	12
231	-101.31	0.352	179	2	77			0.352	6.44541	1.30114	T	T	12
232	-47.726	1.055	180	2	78	1.055						T	12
233	45	0.642	180	2	78		0.642					T	12
234	30.964	0.382	180	2	78			0.382	1.6433	1.68063	T	T	12
235	172.235	1.553	181	2	79	1.553						T	12
236	-97.125	0.536	181	2	79		0.536					T	12
237	-111.801	0.354	181	2	79			0.354	2.89739	1.51412	T	T	12
238	-41.186	0.709	182	2	80	0.709						S	12
239	45	0.168	182	2	80		0.168					S	12
240	-146.31	0.26	182	2	80			0.26	4.22024	0.646154	S	S	12
241	-60.255	1.124	183	2	81	1.124						M	12
242	3.366	1.235	183	2	81		1.235					M	12
243	-164.055	0.486	183	2	81			0.486	0.910121	2.54115	M	M	12
244	155.854	2.26	184	2	82	2.26						M	12
245	-113.962	0.666	184	2	82		0.666					M	12
246	45	0.188	184	2	82			0.188	3.39339	3.54255	M	M	12
247	111.541	2.86	185	2	83	2.86						M	12
248	-167.471	0.658	185	2	83		0.658					M	12
249	0	0.306	185	2	83			0.306	4.3465	2.15033	M	M	12
250	-49.764	2.413	186	2	84	2.413						T	12
251	-116.565	0.593	186	2	84		0.593					T	12
252	30.964	0.368	186	2	84			0.368	4.06914	1.61141	T	T	12
253	10.305	1.606	187	2	85	1.606						M	12
254	-75.964	0.566	187	2	85		0.566					M	12
255	-123.69	0.28	187	2	85			0.28	2.83746	2.02143	M	M	12
256	-10.305	1.534	188	2	86	1.534						M	12
257	-116.565	0.791	188	2	86		0.791					M	12
258	63.435	0.26	188	2	86			0.26	1.93932	3.04231	M	M	12
259	85.815	2.896	189	2	87	2.896						M	12
260	161.565	0.464	189	2	87		0.464					M	12
261	14.036	0.272	189	2	87			0.272	6.24138	1.70588	M	M	12
262	110.556	1.751	190	2	88	1.751						M	12
263	-149.036	0.774	190	2	88		0.774					M	12
264	21.801	0.419	190	2	88			0.419	2.26227	1.84726	M	M	12
265	-90	2.163	191	2	89	2.163						M	12
266	140.194	0.53	191	2	89		0.53					M	12
267	-146.31	0.28	191	2	89			0.28	4.08113	1.89286	M	M	12
268	-90	1.768	192	2	90	1.768						M	12
269	0	0.628	192	2	90		0.628					M	12
270	168.69	0.333	192	2	90			0.333	2.81529	1.88589	M	M	12
271	150.255	0.563	193	2	91	0.563						S	12
272	-126.87	0.4	193	2	91		0.4					S	12
273	-126.87	0.298	193	2	91			0.298	1.4075	1.34228	S	S	12
274	83.66	3.132	194	2	92	3.132						P	12
275	172.875	0.57	194	2	92		0.57					P	12
276	-26.565	0.188	194	2	92			0.188	5.49474	3.03191	P	P	12
277	83.48	2.482	195	2	93	2.482						M	12
278	144.462	0.568	195	2	93		0.568					M	12
279	180	0.279	195	2	93			0.279	4.36972	2.03584	M	M	12
280	-94.399	0.908	196	2	94	0.908						M	12
281	6.34	0.589	196	2	94		0.589					M	12
282	180	0.257	196	2	94			0.257	1.5416	2.29183	M	M	12
283	-85.601	0.954	197	2	95	0.954						M	12
284	7.125	0.56	197	2	95		0.56					M	12
285	0	0.279	197	2	95			0.279	1.70357	2.00717	M	M	12
286	-69.228	2.148	198	2	96	2.148						M	12
287	7.125	0.593	198	2	96		0.593					M	12
288	180	0.327	198	2	96			0.327	3.62226	1.81346	M	M	12
289	57.804	2.182	199	2	97	2.182						T	12
290	131.186	0.757	199	2	97		0.757					T	12
291	-9.462	0.468	199	2	97			0.468	2.88243	1.61752	T	T	12
292	-91.848	2.188	200	2	98	2.188						M	12
293	180	0.512	200	2	98		0.512					M	12
294	33.69	0.298	200	2	98			0.298	4.27344	1.71812	M	M	12
295	-100.784	1.461	201	2	99	1.461						M	12
296	6.34	0.586	201	2	99		0.586					M	12
297	0	0.186	201	2	99			0.186	2.49317	3.15054	M	M	12
298	-80.134	1.602	202	2	100	1.602						M	12
299	-161.565	0.662	202	2	100		0.662					M	12
300	-158.199	0.333	202	2	100			0.333	2.41994	1.98799	M	M	12
301	-43.152	1.515	203	2	101	1.515						T	12
302	-125.538	0.587	203	2	101		0.587					T	12
303	33.69	0.452	203	2	101			0.452	2.58092	1.29867	T	T	12
304	-60.255	2.222	204	2	102	2.222						T	12
305	-149.036	0.387	204	2	102		0.387					T	12
306	26.565	0.281	204	2	102			0.281	5.7416	1.37722	T	T	12
307	-106.39	2.416	205	2	103	2.416						T	12
308	-30.964	0.416	205	2	103		0.416					T	12
309	-33.69	0.265	205	2	103			0.265	5.80769	1.56981	T	T	12
310	78.232	1.711	206	2	104	1.711						T	12
311	-8.13	0.514	206	2	104		0.514					T	12
312	0	0.395	206	2	104			0.395	3.32879	1.30127	T	T	12
313	-103.241	1.191	207	2	105	1.191						M	12
314	-8.13	0.489	207	2	105		0.489					M	12
315	0	0.28	207	2	105			0.28	2.43558	1.74643	M	M	12
316	118.74	2.456	208	2	106	2.456						M	12
317	-146.31	0.768	208	2	106		0.768					M	12
318	0	0.279	208	2	106			0.279	3.19792	2.75269	M	M	12
319	72.181	2.03	209	2	107	2.03						M	12
320	143.13	0.703	209	2	107		0.703					M	12
321	180	0.283	209	2	107			0.283	2.88762	2.4841	M	M	12
322	122.276	1.568	210	2	108	1.568						M	12
323	21.038	0.942	210	2	108		0.942					M	12
324	-172.875	0.54	210	2	108			0.54	1.66454	1.74444	M	M	12
325	71.565	1.332	211	2	109	1.332						T	12
326	162.897	0.898	211	2	109		0.898					T	12
327	-5.194	0.773	211	2	109			0.773	1.4833	1.16171	T	T	12
328	165.964	3.177	212	2	110	3.177						P	12
329	-53.973	0.968	212	2	110		0.968					P	12
330	-126.87	0.335	212	2	110			0.335	3.28202	2.88955	P	P	12
331	65.095	2.135	213	2	111	2.135						T	12
332	144.462	0.555	213	2	111		0.555					T	12
333	-8.13	0.468	213	2	111			0.468	3.84685	1.1859	T	T	12
334	118.496	2.799	214	2	112	2.799						M	12
335	29.055	0.742	214	2	112		0.742					M	12
336	0	0.302	214	2	112			0.302	3.77224	2.45695	M	M	12
337	105.709	2.304	215	2	113	2.304						M	12
338	0	0.861	215	2	113		0.861					M	12
339	33.69	0.303	215	2	113			0.303	2.67596	2.84158	M	M	12
340	57.265	1.142	216	2	114	1.142						M	12
341	140.194	0.517	216	2	114		0.517					M	12
342	-45	0.182	216	2	114			0.182	2.2089	2.84066	M	M	12
343	87.138	1.377	217	2	115	1.377						T	12
344	-39.806	0.593	217	2	115		0.593					T	12
345	11.31	0.361	217	2	115			0.361	2.32209	1.64266	T	T	12
346	-52.651	3.308	218	2	116	3.308						P	12
347	-141.34	0.465	218	2	116		0.465					P	12
348	50.194	0.545	218	2	116			0.545	7.11398	0.853211	P	P	12
349	-56.31	0.981	219	2	117	0.981						S	12
350	-143.13	0.331	219	2	117		0.331					S	12
351	29.745	0.583	219	2	117			0.583	2.96375	0.567753	S	S	12
352	158.749	1.332	220	2	118	1.332						M	12
353	-112.62	0.929	220	2	118		0.929					M	12
354	-161.565	0.458	220	2	118			0.458	1.4338	2.02838	M	M	12
355	113.629	1.207	221	2	119	1.207						T	12
356	-164.055	0.525	221	2	119		0.525					T	12
357	36.87	0.375	221	2	119			0.375	2.29905	1.4	T	T	12
358	49.086	1.388	222	2	120	1.388						M	12
359	-39.806	0.512	222	2	120		0.512					M	12
360	161.565	0.229	222	2	120			0.229	2.71094	2.23581	M	M	12
361	-9.162	2.214	223	2	121	2.214						M	12
362	-111.038	0.929	223	2	121		0.929					M	12
363	-90	0.421	223	2	121			0.421	2.38321	2.20665	M	M	12
364	163.61	1.259	224	2	122	1.259						M	12
365	-116.565	0.648	224	2	122		0.648					M	12
366	-111.801	0.333	224	2	122			0.333	1.9429	1.94595	M	M	12
367	-59.421	1.801	225	2	123	1.801						T	12
368	-173.66	0.655	225	2	123		0.655					T	12
369	-149.036	0.4	225	2	123			0.4	2.74962	1.6375	T	T	12
370	-17.447	2.575	226	2	124	2.575						T	12
371	-116.565	0.479	226	2	124		0.479					T	12
372	-143.13	0.368	226	2	124			0.368	5.37578	1.30163	T	T	12
373	-16.928	1.694	227	2	125	1.694						M	12
374	68.199	1.141	227	2	125		1.141					M	12
375	-111.801	0.375	227	2	125			0.375	1.48466	3.04267	M	M	12
376	148.736	2.31	228	2	126	2.31						T	12
377	-129.806	0.495	228	2	126		0.495					T	12
378	-116.565	0.303	228	2	126			0.303	4.66667	1.63366	T	T	12
379	144.866	2.318	229	2	127	2.318						T	12
380	-173.66	0.635	229	2	127		0.635					T	12
381	-128.66	0.462	229	2	127			0.462	3.65039	1.37446	T	T	12
382	-43.363	1.745	230	2	128	1.745						M	12
383	29.745	0.52	230	2	128		0.52					M	12
384	90	0.302	230	2	128			0.302	3.35577	1.72185	M	M	12
385	110.925	2.54	231	2	129	2.54						T	12
386	18.435	0.398	231	2	129		0.398					T	12
387	-158.199	0.339	231	2	129			0.339	6.38191	1.17404	T	T	12
388	-111.038	0.986	232	2	130	0.986						S	12
389	150.945	0.739	232	2	130		0.739					S	12
390	-15.945	0.523	232	2	130			0.523	1.33424	1.413	S	S	12
391	-41.186	1.486	233	2	131	1.486						M	12
392	-90	0.698	233	2	131		0.698					M	12
393	30.964	0.387	233	2	131			0.387	2.12894	1.80362	M	M	12
394	69.444	1.817	234	2	132	1.817						T	12
395	-14.036	0.575	234	2	132		0.575					T	12
396	-15.945	0.486	234	2	132			0.486	3.16	1.18313	T	T	12
397	-110.854	1.538	235	2	133	1.538						T	12
398	153.435	0.635	235	2	133		0.635					T	12
399	-9.462	0.402	235	2	133			0.402	2.42205	1.5796	T	T	12
1	-95.906	3.107	236	3	1	3.107						P	12
2	-59.036	0.64	236	3	1		0.64					P	12
3	0	0.39	236	3	1			0.39	4.85469	1.64103	P	P	12
4	110.556	1.852	237	3	2	1.852						T	12
5	-171.87	0.71	237	3	2		0.71					T	12
6	11.31	0.502	237	3	2			0.502	2.60845	1.41434	T	T	12
7	-142.125	1.231	238	3	3	1.231						T	12
8	-53.13	0.541	238	3	3		0.541					T	12
9	-45	0.427	238	3	3			0.427	2.27542	1.26698	T	T	12
10	-50.711	1.485	239	3	4	1.485						T	12
11	-143.13	0.482	239	3	4		0.482					T	12
12	63.435	0.303	239	3	4			0.303	3.08091	1.59076	T	T	12
13	-59.036	0.64	240	3	5	0.64						S	12
14	-128.66	0.628	240	3	5		0.628					S	12
15	-135	0.427	240	3	5			0.427	1.01911	1.47073	S	S	12
16	143.973	1.476	241	3	6	1.476						T	12
17	-108.435	0.335	241	3	6		0.335					T	12
18	14.036	0.427	241	3	6			0.427	4.40597	0.784543	T	T	12
19	-51.34	0.738	242	3	7	0.738						S	12
20	-135	0.355	242	3	7		0.355					S	12
21	180	0.321	242	3	7			0.321	2.07887	1.10592	S	S	12
22	123.69	1.941	243	3	8	1.941						T	12
23	-168.69	0.543	243	3	8		0.543					T	12
24	45	0.404	243	3	8			0.404	3.57459	1.34406	T	T	12
25	99.462	2.624	244	3	9	2.624						T	12
26	26.565	0.652	244	3	9		0.652					T	12
27	-165.964	0.397	244	3	9			0.397	4.02454	1.64232	T	T	12
28	-36.87	1.102	245	3	10	1.102						T	12
29	-120.964	0.635	245	3	10		0.635					T	12
30	-135	0.377	245	3	10			0.377	1.73543	1.68435	T	T	12
31	-63.435	1.19	246	3	11	1.19						T	12
32	-158.199	0.652	246	3	11		0.652					T	12
33	0	0.427	246	3	11			0.427	1.82515	1.52693	T	T	12
34	-107.354	1.798	247	3	12	1.798						T	12
35	0	0.642	247	3	12		0.642					T	12
36	0	0.537	247	3	12			0.537	2.80062	1.19553	T	T	12
37	-29.055	1.034	248	3	13	1.034						T	12
38	-126.87	0.493	248	3	13		0.493					T	12
39	-153.435	0.512	248	3	13			0.512	2.09736	0.962891	T	T	12
40	-35.538	1.852	249	3	14	1.852						T	12
41	-126.87	0.554	249	3	14		0.554					T	12
42	36.87	0.477	249	3	14			0.477	3.34296	1.16143	T	T	12
43	-108.435	1.279	250	3	15	1.279						T	12
44	-15.945	0.697	250	3	15		0.697					T	12
45	0	0.532	250	3	15			0.532	1.83501	1.31015	T	T	12
46	-57.529	2.745	251	3	16	2.745						T	12
47	39.806	0.754	251	3	16		0.754					T	12
48	-135	0.477	251	3	16			0.477	3.64058	1.58071	T	T	12
49	170.538	1.336	252	3	17	1.336						M	12
50	-90	0.674	252	3	17		0.674					M	12
51	-108.435	0.37	252	3	17			0.37	1.9822	1.82162	M	M	12
52	135	1.33	253	3	18	1.33						T	12
53	-120.964	0.632	253	3	18		0.632					T	12
54	-141.34	0.64	253	3	18			0.64	2.10443	0.9875	T	T	12
55	61.699	1.509	254	3	19	1.509						T	12
56	-26.565	0.461	254	3	19		0.461					T	12
57	180	0.533	254	3	19			0.533	3.27332	0.864916	T	T	12
58	-85.914	1.492	255	3	20	1.492						T	12
59	-171.87	0.748	255	3	20		0.748					T	12
60	0	0.463	255	3	20			0.463	1.99465	1.61555	T	T	12
61	-54.462	0.945	256	3	21	0.945						S	12
62	11.31	0.585	256	3	21		0.585					S	12
63	33.69	0.349	256	3	21			0.349	1.61538	1.67622	S	S	12
64	137.291	1.856	257	3	22	1.856						T	12
65	-135	0.335	257	3	22		0.335					T	12
66	45	0.277	257	3	22			0.277	5.5403	1.20939	T	T	12
67	-111.251	2.01	258	3	23	2.01						T	12
68	180	0.78	258	3	23		0.78					T	12
69	180	0.463	258	3	23			0.463	2.57692	1.68467	T	T	12
70	86.634	1.846	259	3	24	1.846						M	12
71	-171.87	0.717	259	3	24		0.717					M	12
72	18.435	0.362	259	3	24			0.362	2.57462	1.98066	M	M	12
73	54.782	2.285	260	3	25	2.285						M	12
74	-45	0.753	260	3	25		0.753					M	12
75	165.964	0.439	260	3	25			0.439	3.03453	1.71526	M	M	12
76	93.366	1.846	261	3	26	1.846						M	12
77	-172.875	0.823	261	3	26		0.823					M	12
78	-168.69	0.473	261	3	26			0.473	2.24301	1.73996	M	M	12
79	-57.265	1.811	262	3	27	1.811						T	12
80	-135	0.404	262	3	27		0.404					T	12
81	-170.538	0.682	262	3	27			0.682	4.48267	0.592375	T	T	12
82	-48.814	1.131	263	3	28	1.131						T	12
83	-146.31	0.427	263	3	28		0.427					T	12
84	-161.565	0.365	263	3	28			0.365	2.64871	1.16986	T	T	12
85	108.435	0.969	264	3	29	0.969						S	12
86	-170.538	0.62	264	3	29		0.62					S	12
87	-161.565	0.382	264	3	29			0.382	1.5629	1.62304	S	S	12
88	95.711	1.14	265	3	30	1.14						T	12
89	180	0.71	265	3	30		0.71					T	12
90	-165.964	0.467	265	3	30			0.467	1.60563	1.52034	T	T	12
91	113.962	1.113	266	3	31	1.113						T	12
92	-168.69	0.551	266	3	31		0.551					T	12
93	0	0.355	266	3	31			0.355	2.01996	1.55211	T	T	12
94	-36.87	1.54	267	3	32	1.54						M	12
95	-116.565	0.493	267	3	32		0.493					M	12
96	180	0.258	267	3	32			0.258	3.12373	1.91085	M	M	12
97	-106.699	2.244	268	3	33	2.244						T	12
98	149.036	0.603	268	3	33		0.603					T	12
99	0	0.357	268	3	33			0.357	3.72139	1.68908	T	T	12
100	-99.462	1.32	269	3	34	1.32						M	12
101	180	0.851	269	3	34		0.851					M	12
102	0	0.392	269	3	34			0.392	1.55112	2.17092	M	M	12
103	85.236	1.289	270	3	35	1.289						T	12
104	171.87	0.748	270	3	35		0.748					T	12
105	0	0.568	270	3	35			0.568	1.72326	1.3169	T	T	12
106	90	0.851	271	3	36	0.851						S	12
107	180	0.71	271	3	36		0.71					S	12
108	-165.964	0.502	271	3	36			0.502	1.19859	1.41434	S	S	12
109	-108.435	0.654	272	3	37	0.654						S	12
110	-8.13	0.682	272	3	37		0.682					S	12
111	0	0.461	272	3	37			0.461	0.958944	1.47939	S	S	12
112	-66.038	1.1	273	3	38	1.1						T	12
113	34.992	1.242	273	3	38		1.242					T	12
114	180	0.748	273	3	38			0.748	0.885668	1.66043	T	T	12
115	95.711	1.079	274	3	39	1.079						M	12
116	180	0.568	274	3	39		0.568					M	12
117	180	0.284	274	3	39			0.284	1.89965	2	M	M	12
118	-102.995	1.482	275	3	40	1.482						T	12
119	0	0.461	275	3	40		0.461					T	12
120	-45	0.301	275	3	40			0.301	3.21475	1.53156	T	T	12
121	96.34	1.932	276	3	41	1.932						T	12
122	-146.31	0.748	276	3	41		0.748					T	12
123	165.964	0.482	276	3	41			0.482	2.58289	1.55187	T	T	12
124	119.745	0.92	277	3	42	0.92						S	12
125	-159.444	0.83	277	3	42		0.83					S	12
126	-153.435	0.685	277	3	42			0.685	1.10843	1.21168	S	S	12
127	85.426	2.707	278	3	43	2.707						M	12
128	168.69	0.498	278	3	43		0.498					M	12
129	180	0.251	278	3	43			0.251	5.43574	1.98406	M	M	12
130	-50.194	0.831	279	3	44	0.831						S	12
131	-143.13	0.554	279	3	44		0.554					S	12
132	-146.31	0.384	279	3	44			0.384	1.5	1.44271	S	S	12
133	84.289	1.105	280	3	45	1.105						T	12
134	0	0.461	280	3	45		0.461					T	12
135	0	0.284	280	3	45			0.284	2.39696	1.62324	T	T	12
136	63.435	1.111	281	3	46	1.111						T	12
137	-38.66	0.718	281	3	46		0.718					T	12
138	-26.565	0.449	281	3	46			0.449	1.54735	1.59911	T	T	12
139	-79.695	1.17	282	3	47	1.17						T	12
140	-170.538	0.654	282	3	47		0.654					T	12
141	14.036	0.439	282	3	47			0.439	1.78899	1.48975	T	T	12
142	56.31	1.93	283	3	48	1.93						T	12
143	146.31	0.762	283	3	48		0.762					T	12
144	-36.87	0.512	283	3	48			0.512	2.53281	1.48828	T	T	12
145	97.125	0.835	284	3	49	0.835						S	12
146	0	0.463	284	3	49		0.463					S	12
147	14.036	0.498	284	3	49			0.498	1.80346	0.929719	S	S	12
148	53.13	1.497	285	3	50	1.497						T	12
149	123.69	0.433	285	3	50		0.433					T	12
150	-33.69	0.401	285	3	50			0.401	3.45727	1.0798	T	T	12
151	-128.66	1.332	286	3	51	1.332						T	12
152	-36.87	0.504	286	3	51		0.504					T	12
153	-75.964	0.404	286	3	51			0.404	2.64286	1.24752	T	T	12
154	-162.474	2.076	287	3	52	2.076						T	12
155	-90	0.426	287	3	52		0.426					T	12
156	-71.565	0.337	287	3	52			0.337	4.87324	1.26409	T	T	12
157	101.31	1.12	288	3	53	1.12						T	12
158	180	0.467	288	3	53		0.467					T	12
159	-26.565	0.463	288	3	53			0.463	2.39829	1.00864	T	T	12
160	172.235	2.403	289	3	54	2.403						T	12
161	-90	0.39	289	3	54		0.39					T	12
162	-63.435	0.293	289	3	54			0.293	6.16154	1.33106	T	T	12
163	-151.699	1.619	290	3	55	1.619						T	12
164	-90	0.497	290	3	55		0.497					T	12
165	135	0.327	290	3	55			0.327	3.25755	1.51988	T	T	12
166	-165.964	1.343	291	3	56	1.343						T	12
167	-78.69	0.463	291	3	56		0.463					T	12
168	-75.964	0.473	291	3	56			0.473	2.90065	0.978858	T	T	12
169	-90	0.888	292	3	57	0.888						S	12
170	0	0.463	292	3	57		0.463					S	12
171	0	0.498	292	3	57			0.498	1.91793	0.929719	S	S	12
172	-135	0.628	293	3	58	0.628						S	12
173	153.435	0.476	293	3	58		0.476					S	12
174	-45	0.482	293	3	58			0.482	1.31933	0.987552	S	S	12
175	-149.036	0.621	294	3	59	0.621						S	12
176	146.31	0.427	294	3	59		0.427					S	12
177	146.31	0.384	294	3	59			0.384	1.45433	1.11198	S	S	12
178	26.565	1.637	295	3	60	1.637						M	12
179	-75.964	0.898	295	3	60		0.898					M	12
180	135	0.335	295	3	60			0.335	1.82294	2.6806	M	M	12
181	180	1.454	296	3	61	1.454						T	12
182	-78.69	0.533	296	3	61		0.533					T	12
183	-90	0.426	296	3	61			0.426	2.72795	1.25117	T	T	12
184	-45	2.234	297	3	62	2.234						T	12
185	53.13	0.61	297	3	62		0.61					T	12
186	9.462	0.612	297	3	62			0.612	3.6623	0.996732	T	T	12
187	26.565	1.428	298	3	63	1.428						T	12
188	111.801	0.587	298	3	63		0.587					T	12
189	-56.31	0.429	298	3	63			0.429	2.43271	1.3683	T	T	12
190	63.435	0.731	299	3	64	0.731						S	12
191	-18.435	1.021	299	3	64		1.021					S	12
192	161.565	0.673	299	3	64			0.673	0.715965	1.51709	S	S	12
193	-73.496	2.929	300	3	65	2.929						T	12
194	180	0.533	300	3	65		0.533					T	12
195	0	0.355	300	3	65			0.355	5.49531	1.50141	T	T	12
196	-173.418	2.821	301	3	66	2.821						T	12
197	-80.538	0.585	301	3	66		0.585					T	12
198	-71.565	0.362	301	3	66			0.362	4.82222	1.61602	T	T	12
199	92.726	2.171	302	3	67	2.171						M	12
200	-172.875	0.87	302	3	67		0.87					M	12
201	180	0.39	302	3	67			0.39	2.4954	2.23077	M	M	12
202	6.009	2.002	303	3	68	2.002						T	12
203	-90	0.603	303	3	68		0.603					T	12
204	-78.69	0.508	303	3	68			0.508	3.32007	1.18701	T	T	12
205	-131.634	1.28	304	3	69	1.28						M	12
206	-63.435	1.254	304	3	69		1.254					M	12
207	135	0.286	304	3	69			0.286	1.02073	4.38462	M	M	12
208	47.291	1.857	305	3	70	1.857						M	12
209	-45	0.604	305	3	70		0.604					M	12
210	161.565	0.317	305	3	70			0.317	3.0745	1.90536	M	M	12
211	-168.69	1.079	306	3	71	1.079						T	12
212	-78.69	0.508	306	3	71		0.508					T	12
213	-71.565	0.317	306	3	71			0.317	2.12402	1.60252	T	T	12
214	-130.101	2.671	307	3	72	2.671						T	12
215	-56.31	0.414	307	3	72		0.414					T	12
216	-33.69	0.427	307	3	72			0.427	6.45169	0.969555	T	T	12
217	57.529	1.358	308	3	73	1.358						T	12
218	-30.964	0.561	308	3	73		0.561					T	12
219	-71.565	0.365	308	3	73			0.365	2.42068	1.53699	T	T	12
220	120.964	2.452	309	3	74	2.452						T	12
221	-140.194	0.809	309	3	74		0.809					T	12
222	-170.538	0.612	309	3	74			0.612	3.0309	1.3219	T	T	12
223	-99.462	1.295	310	3	75	1.295						M	12
224	9.462	0.647	310	3	75		0.647					M	12
225	161.565	0.321	310	3	75			0.321	2.00155	2.01558	M	M	12
226	42.709	1.957	311	3	76	1.957						M	12
227	-26.565	1.016	311	3	76		1.016					M	12
228	168.69	0.482	311	3	76			0.482	1.92618	2.10788	M	M	12
229	135	1.857	312	3	77	1.857						M	12
230	-141.34	0.731	312	3	77		0.731					M	12
231	18.435	0.337	312	3	77			0.337	2.54036	2.16914	M	M	12
232	83.66	0.933	313	3	78	0.933						M	12
233	0	0.993	313	3	78		0.993					M	12
234	180	0.392	313	3	78			0.392	0.939577	2.53316	M	M	12
235	-83.66	1.034	314	3	79	1.034						T	12
236	0	0.426	314	3	79		0.426					T	12
237	0	0.284	314	3	79			0.284	2.42723	1.5	T	T	12
238	-63.435	0.73	315	3	80	0.73						S	12
239	-126.87	0.527	315	3	80		0.527					S	12
240	-165.964	0.415	315	3	80			0.415	1.3852	1.26988	S	S	12
241	-63.435	1.382	316	3	81	1.382						M	12
242	-143.13	0.512	316	3	81		0.512					M	12
243	0	0.181	316	3	81			0.181	2.69922	2.82873	M	M	12
244	-139.399	0.981	317	3	82	0.981						M	12
245	-36.87	0.524	317	3	82		0.524					M	12
246	135	0.301	317	3	82			0.301	1.87214	1.74086	M	M	12
247	-128.66	0.66	318	3	83	0.66						S	12
248	-60.255	0.827	318	3	83		0.827					S	12
249	-51.34	0.709	318	3	83			0.709	0.798065	1.16643	S	S	12
250	-173.66	3.898	319	3	84	3.898						P	12
251	119.745	0.841	319	3	84		0.841					P	12
252	-101.31	0.467	319	3	84			0.467	4.63496	1.80086	P	P	12
253	105.524	1.974	320	3	85	1.974						M	12
254	-149.036	1.223	320	3	85		1.223					M	12
255	180	0.607	320	3	85			0.607	1.61406	2.01483	M	M	12
256	-149.036	1.241	321	3	86	1.241						T	12
257	-80.538	0.682	321	3	86		0.682					T	12
258	-45	0.504	321	3	86			0.504	1.81965	1.35317	T	T	12
259	78.111	2.109	322	3	87	2.109						M	12
260	169.695	1.205	322	3	87		1.205					M	12
261	0	0.321	322	3	87			0.321	1.75021	3.75389	M	M	12
262	-90	2.341	323	3	88	2.341						M	12
263	180	1.029	323	3	88		1.029					M	12
264	-26.565	0.461	323	3	88			0.461	2.27502	2.2321	M	M	12
265	90	2.128	324	3	89	2.128						M	12
266	7.125	0.893	324	3	89		0.893					M	12
267	0	0.463	324	3	89			0.463	2.38298	1.92873	M	M	12
268	-130.601	1.005	325	3	90	1.005						T	12
269	-45	0.731	325	3	90		0.731					T	12
270	-21.801	0.573	325	3	90			0.573	1.37483	1.27574	T	T	12
271	-135	0.502	326	3	91	0.502						S	12
272	-20.556	0.843	326	3	91		0.843					S	12
273	149.036	0.59	326	3	91			0.59	0.595492	1.42881	S	S	12
274	-94.764	1.285	327	3	92	1.285						T	12
275	180	0.678	327	3	92		0.678					T	12
276	0	0.497	327	3	92			0.497	1.89528	1.36419	T	T	12
277	-106.26	2.637	328	3	93	2.637						T	12
278	164.055	0.785	328	3	93		0.785					T	12
279	-11.31	0.537	328	3	93			0.537	3.35924	1.46182	T	T	12
280	-135	0.928	329	3	94	0.928						M	12
281	-30.964	0.7	329	3	94		0.7					M	12
282	180	0.397	329	3	94			0.397	1.32571	1.76322	M	M	12
283	57.529	1.399	330	3	95	1.399						T	12
284	-18.435	0.303	330	3	95		0.303					T	12
285	-33.69	0.327	330	3	95			0.327	4.61716	0.926606	T	T	12
286	-129.289	1.508	331	3	96	1.508						M	12
287	-45	1.029	331	3	96		1.029					M	12
288	-45	0.286	331	3	96			0.286	1.4655	3.5979	M	M	12
289	108.435	1.728	332	3	97	1.728						T	12
290	15.945	0.775	332	3	97		0.775					T	12
291	0	0.463	332	3	97			0.463	2.22968	1.67387	T	T	12
292	121.608	1.647	333	3	98	1.647						M	12
293	-146.31	0.79	333	3	98		0.79					M	12
294	0	0.346	333	3	98			0.346	2.08481	2.28324	M	M	12
295	61.39	1.346	334	3	99	1.346						M	12
296	-29.745	0.9	334	3	99		0.9					M	12
297	-26.565	0.406	334	3	99			0.406	1.49556	2.21675	M	M	12
298	102.095	1.54	335	3	100	1.54						M	12
299	-141.34	0.687	335	3	100		0.687					M	12
300	180	0.293	335	3	100			0.293	2.24163	2.34471	M	M	12
301	66.371	1.789	336	3	101	1.789						M	12
302	-21.801	0.548	336	3	101		0.548					M	12
303	-33.69	0.321	336	3	101			0.321	3.2646	1.70717	M	M	12
304	-111.801	0.584	337	3	102	0.584						S	12
305	153.435	0.297	337	3	102		0.297					S	12
306	153.435	0.381	337	3	102			0.381	1.96633	0.779528	S	S	12
307	141.34	1.267	338	3	103	1.267						T	12
308	-135	0.508	338	3	103		0.508					T	12
309	-135	0.32	338	3	103			0.32	2.49409	1.5875	T	T	12
310	-71.565	0.724	339	3	104	0.724						M	12
311	-149.036	0.561	339	3	104		0.561					M	12
312	-153.435	0.155	339	3	104			0.155	1.29055	3.61935	M	M	12
313	-138.814	1.131	340	3	105	1.131						T	12
314	161.565	0.673	340	3	105		0.673					T	12
315	0	0.452	340	3	105			0.452	1.68053	1.48894	T	T	12
316	-101.31	1.175	341	3	106	1.175						M	12
317	168.69	0.508	341	3	106		0.508					M	12
318	161.565	0.294	341	3	106			0.294	2.31299	1.72789	M	M	12
319	126.87	1.092	342	3	107	1.092						T	12
320	-153.435	0.489	342	3	107		0.489					T	12
321	-135	0.414	342	3	107			0.414	2.23313	1.18116	T	T	12
322	135	1.768	343	3	108	1.768						T	12
323	-146.31	0.31	343	3	108		0.31					T	12
324	-161.565	0.287	343	3	108			0.287	5.70323	1.08014	T	T	12
325	103.392	2.234	344	3	109	2.234						T	12
326	180	0.561	344	3	109		0.561					T	12
327	-146.31	0.347	344	3	109			0.347	3.98217	1.61671	T	T	12
328	-93.013	2.026	345	3	110	2.026						M	12
329	5.194	1.2	345	3	110		1.2					M	12
330	170.538	0.644	345	3	110			0.644	1.68833	1.86335	M	M	12
331	153.435	0.69	346	3	111	0.69						S	12
332	-143.13	0.539	346	3	111		0.539					S	12
333	-146.31	0.393	346	3	111			0.393	1.28015	1.3715	S	S	12
334	-105.945	1.583	347	3	112	1.583						M	12
335	-21.801	0.548	347	3	112		0.548					M	12
336	33.69	0.32	347	3	112			0.32	2.88869	1.7125	M	M	12
337	74.745	1.254	348	3	113	1.254						M	12
338	-26.565	0.465	348	3	113		0.465					M	12
339	153.435	0.262	348	3	113			0.262	2.69677	1.77481	M	M	12
340	-127.875	1.134	349	3	114	1.134						M	12
341	-63.435	0.525	349	3	114		0.525					M	12
342	0	0.303	349	3	114			0.303	2.16	1.73267	M	M	12
343	-83.66	0.932	350	3	115	0.932						M	12
344	0	0.798	350	3	115		0.798					M	12
345	0	0.452	350	3	115			0.452	1.16792	1.76549	M	M	12
346	111.251	2.006	351	3	116	2.006						M	12
347	21.801	0.678	351	3	116		0.678					M	12
348	33.69	0.357	351	3	116			0.357	2.9587	1.89916	M	M	12
349	-77.471	1.955	352	3	117	1.955						T	12
350	50.194	0.829	352	3	117		0.829					T	12
351	14.036	0.497	352	3	117			0.497	2.35826	1.66801	T	T	12
352	138.013	1.417	353	3	118	1.417						M	12
353	-123.69	0.745	353	3	118		0.745					M	12
354	180	0.329	353	3	118			0.329	1.90201	2.26444	M	M	12
1	-143.973	1.514	354	4	1	1.514						T	12
2	-75.964	0.465	354	4	1		0.465					T	12
3	-71.565	0.362	354	4	1			0.362	3.25591	1.28453	T	T	12
4	-42.879	1.977	355	4	2	1.977						T	12
5	-135	0.452	355	4	2		0.452					T	12
6	-108.435	0.362	355	4	2			0.362	4.37389	1.24862	T	T	12
7	169.695	1.191	356	4	3	1.191						T	12
8	-101.31	0.46	356	4	3		0.46					T	12
9	-108.435	0.346	356	4	3			0.346	2.58913	1.32948	T	T	12
10	164.055	1.628	357	4	4	1.628						T	12
11	-123.69	0.416	357	4	4		0.416					T	12
12	-90	0.266	357	4	4			0.266	3.91346	1.56391	T	T	12
13	164.476	1.99	358	4	5	1.99						T	12
14	-123.69	0.384	358	4	5		0.384					T	12
15	-104.036	0.388	358	4	5			0.388	5.18229	0.989691	T	T	12
16	9.462	0.622	359	4	6	0.622						M	12
17	-74.055	0.743	359	4	6		0.743					M	12
18	-90	0.399	359	4	6			0.399	0.837147	1.86216	M	M	12
19	-122.471	1.315	360	4	7	1.315						M	12
20	-33.69	0.74	360	4	7		0.74					M	12
21	-18.435	0.371	360	4	7			0.371	1.77703	1.99461	M	M	12
22	180	1.331	361	4	8	1.331						T	12
23	146.31	0.421	361	4	8		0.421					T	12
24	-90	0.268	361	4	8			0.268	3.16152	1.5709	T	T	12
25	160.346	1.602	362	4	9	1.602						M	12
26	54.462	0.842	362	4	9		0.842					M	12
27	-104.036	0.486	362	4	9			0.486	1.90261	1.73251	M	M	12
28	25.017	1.741	363	4	10	1.741						M	12
29	-63.435	0.512	363	4	10		0.512					M	12
30	-90	0.272	363	4	10			0.272	3.40039	1.88235	M	M	12
31	-170.538	1.279	364	4	11	1.279						M	12
32	-78.69	0.549	364	4	11		0.549					M	12
33	-90	0.294	364	4	11			0.294	2.32969	1.86735	M	M	12
34	16.928	2.543	365	4	12	2.543						M	12
35	116.565	0.717	365	4	12		0.717					M	12
36	-90	0.346	365	4	12			0.346	3.54672	2.07225	M	M	12
37	-161.565	0.918	366	4	13	0.918						M	12
38	-90	0.506	366	4	13		0.506					M	12
39	-90	0.266	366	4	13			0.266	1.81423	1.90226	M	M	12
40	177.138	2.078	367	4	14	2.078						M	12
41	-111.801	0.595	367	4	14		0.595					M	12
42	-108.435	0.321	367	4	14			0.321	3.49244	1.85358	M	M	12
43	-147.995	1.005	368	4	15	1.005						T	12
44	135	0.399	368	4	15		0.399					T	12
45	90	0.24	368	4	15			0.24	2.5188	1.6625	T	T	12
46	-59.036	1.183	369	4	16	1.183						T	12
47	45	0.453	369	4	16		0.453					T	12
48	18.435	0.357	369	4	16			0.357	2.61148	1.26891	T	T	12
49	169.992	1.839	370	4	17	1.839						M	12
50	135	0.443	370	4	17		0.443					M	12
51	-135	0.251	370	4	17			0.251	4.15124	1.76494	M	M	12
52	-52.696	2.764	371	4	18	2.764						T	12
53	26.565	0.215	371	4	18		0.215					T	12
54	-123.69	0.357	371	4	18			0.357	12.8558	0.602241	T	T	12
55	26.565	1.382	372	4	19	1.382						T	12
56	-90	0.479	372	4	19		0.479					T	12
57	-108.435	0.347	372	4	19			0.347	2.88518	1.3804	T	T	12
58	124.509	2.018	373	4	20	2.018						T	12
59	38.66	0.661	373	4	20		0.661					T	12
60	30.964	0.585	373	4	20			0.585	3.05295	1.12991	T	T	12
61	145.008	1.241	374	4	21	1.241						T	12
62	-135	0.416	374	4	21		0.416					T	12
63	-123.69	0.357	374	4	21			0.357	2.98317	1.16527	T	T	12
64	-12.995	1.384	375	4	22	1.384						T	12
65	-116.565	0.683	375	4	22		0.683					T	12
66	-116.565	0.505	375	4	22			0.505	2.02635	1.35248	T	T	12
67	-28.301	1.596	376	4	23	1.596						T	12
68	-116.565	0.667	376	4	23		0.667					T	12
69	14.036	0.439	376	4	23			0.439	2.3928	1.51936	T	T	12
70	90	0.907	377	4	24	0.907						M	12
71	180	0.427	377	4	24		0.427					M	12
72	180	0.168	377	4	24			0.168	2.12412	2.54167	M	M	12
73	123.69	1.138	378	4	25	1.138						T	12
74	-165.964	0.362	378	4	25		0.362					T	12
75	-153.435	0.238	378	4	25			0.238	3.14365	1.52101	T	T	12
76	0	0.932	379	4	26	0.932						M	12
77	-90	0.373	379	4	26		0.373					M	12
78	-90	0.186	379	4	26			0.186	2.49866	2.00538	M	M	12
79	-56.31	1.492	380	4	27	1.492						T	12
80	45	0.421	380	4	27		0.421					T	12
81	45	0.433	380	4	27			0.433	3.54394	0.972286	T	T	12
82	164.745	1.229	381	4	28	1.229						M	12
83	-104.036	0.446	381	4	28		0.446					M	12
84	-90	0.188	381	4	28			0.188	2.75561	2.37234	M	M	12
85	172.875	1.717	382	4	29	1.717						M	12
86	-98.13	0.697	382	4	29		0.697					M	12
87	-123.69	0.37	382	4	29			0.37	2.46341	1.88378	M	M	12
88	153.435	1.084	383	4	30	1.084						M	12
89	-123.69	0.384	383	4	30		0.384					M	12
90	90	0.16	383	4	30			0.16	2.82292	2.4	M	M	12
91	-107.103	1.423	384	4	31	1.423						T	12
92	-38.66	0.682	384	4	31		0.682					T	12
93	26.565	0.43	384	4	31			0.43	2.08651	1.58605	T	T	12
94	176.186	1.55	385	4	32	1.55						M	12
95	-90	0.639	385	4	32		0.639					M	12
96	-90	0.32	385	4	32			0.32	2.42567	1.99687	M	M	12
97	180	0.879	386	4	33	0.879						M	12
98	-90	0.613	386	4	33		0.613					M	12
99	-108.435	0.337	386	4	33			0.337	1.43393	1.81899	M	M	12
100	-6.34	1.958	387	4	34	1.958						M	12
101	-99.462	0.691	387	4	34		0.691					M	12
102	71.565	0.321	387	4	34			0.321	2.83357	2.15265	M	M	12
103	172.875	0.856	388	4	35	0.856						S	12
104	90	0.294	388	4	35		0.294					S	12
105	90	0.294	388	4	35			0.294	2.91156	1	S	S	12
106	104.036	1.661	389	4	36	1.661						M	12
107	15.945	0.743	389	4	36		0.743					M	12
108	-165.964	0.433	389	4	36			0.433	2.23553	1.71594	M	M	12
109	157.38	1.322	390	4	37	1.322						M	12
110	-108.435	0.962	390	4	37		0.962					M	12
111	-135	0.421	390	4	37			0.421	1.37422	2.28504	M	M	12
112	4.764	1.283	391	4	38	1.283						M	12
113	-90	0.586	391	4	38		0.586					M	12
114	-90	0.32	391	4	38			0.32	2.18942	1.83125	M	M	12
115	165.964	0.867	392	4	39	0.867						S	12
116	-90	0.294	392	4	39		0.294					S	12
117	-116.565	0.203	392	4	39			0.203	2.94898	1.44828	S	S	12
118	-26.565	0.49	393	4	40	0.49						S	12
119	-101.31	0.549	393	4	40		0.549					S	12
120	-104.036	0.472	393	4	40			0.472	0.892532	1.16314	S	S	12
121	159.444	1.874	394	4	41	1.874						T	12
122	-101.31	0.531	394	4	41		0.531					T	12
123	-108.435	0.413	394	4	41			0.413	3.52919	1.28571	T	T	12
124	60.945	1.084	395	4	42	1.084						M	12
125	168.69	0.591	395	4	42		0.591					M	12
126	135	0.271	395	4	42			0.271	1.83418	2.18081	M	M	12
127	171.87	0.757	396	4	43	0.757						S	12
128	-104.036	0.472	396	4	43		0.472					S	12
129	63.435	0.278	396	4	43			0.278	1.60381	1.69784	S	S	12
130	-169.695	1.191	397	4	44	1.191						M	12
131	-99.462	0.641	397	4	44		0.641					M	12
132	-90	0.266	397	4	44			0.266	1.85803	2.40977	M	M	12
133	142.125	1.227	398	4	45	1.227						M	12
134	-116.565	0.429	398	4	45		0.429					M	12
135	-116.565	0.245	398	4	45			0.245	2.86014	1.75102	M	M	12
136	70.017	1.204	399	4	46	1.204						T	12
137	-18.435	0.312	399	4	46		0.312					T	12
138	116.565	0.304	399	4	46			0.304	3.85897	1.02632	T	T	12
139	-156.038	1.025	400	4	47	1.025						T	12
140	-45	0.774	400	4	47		0.774					T	12
141	-75.964	0.482	400	4	47			0.482	1.32429	1.60581	T	T	12
142	-149.534	2.055	401	4	48	2.055						T	12
143	-101.31	0.543	401	4	48		0.543					T	12
144	108.435	0.407	401	4	48			0.407	3.78453	1.33415	T	T	12
145	180	0.746	402	4	49	0.746						S	12
146	-71.565	0.388	402	4	49		0.388					S	12
147	-90	0.373	402	4	49			0.373	1.92268	1.04021	S	S	12
148	18.435	1.718	403	4	50	1.718						M	12
149	-80.538	0.588	403	4	50		0.588					M	12
150	-90	0.32	403	4	50			0.32	2.92177	1.8375	M	M	12
151	130.601	1.964	404	4	51	1.964						M	12
152	16.699	1.138	404	4	51		1.138					M	12
153	63.435	0.298	404	4	51			0.298	1.72583	3.81879	M	M	12
154	104.036	1.247	405	4	52	1.247						T	12
155	-168.69	0.586	405	4	52		0.586					T	12
156	-108.435	0.371	405	4	52			0.371	2.12799	1.57951	T	T	12
157	132.274	1.526	406	4	53	1.526						M	12
158	-158.199	0.608	406	4	53		0.608					M	12
159	-146.31	0.321	406	4	53			0.321	2.50987	1.89408	M	M	12
160	177.138	2.105	407	4	54	2.105						T	12
161	-90	0.377	407	4	54		0.377					T	12
162	-90	0.266	407	4	54			0.266	5.58355	1.41729	T	T	12
163	30.256	1.397	408	4	55	1.397						M	12
164	-54.462	0.89	408	4	55		0.89					M	12
165	-71.565	0.4	408	4	55			0.4	1.56966	2.225	M	M	12
166	-168.69	1.646	409	4	56	1.646						M	12
167	-90	0.692	409	4	56		0.692					M	12
168	-71.565	0.329	409	4	56			0.329	2.37861	2.10334	M	M	12
169	-153.435	1.691	410	4	57	1.691						M	12
170	-71.565	0.699	410	4	57		0.699					M	12
171	-90	0.293	410	4	57			0.293	2.41917	2.38567	M	M	12
172	-129.806	0.832	411	4	58	0.832						S	12
173	-45	0.325	411	4	58		0.325					S	12
174	-45	0.283	411	4	58			0.283	2.56	1.14841	S	S	12
175	-39.806	0.866	412	4	59	0.866						S	12
176	-108.435	0.381	412	4	59		0.381					S	12
177	-108.435	0.329	412	4	59			0.329	2.27297	1.15805	S	S	12
178	131.987	1.453	413	4	60	1.453						M	12
179	38.66	0.666	413	4	60		0.666					M	12
180	71.565	0.346	413	4	60			0.346	2.18168	1.92486	M	M	12
181	161.565	1.745	414	4	61	1.745						T	12
182	-108.435	0.608	414	4	61		0.608					T	12
183	-104.036	0.433	414	4	61			0.433	2.87007	1.40416	T	T	12
184	165.964	0.867	415	4	62	0.867						S	12
185	-111.801	0.564	415	4	62		0.564					S	12
186	-123.69	0.437	415	4	62			0.437	1.53723	1.29062	S	S	12
187	25.201	1.966	416	4	63	1.966						M	12
188	161.565	0.659	416	4	63		0.659					M	12
189	-108.435	0.362	416	4	63			0.362	2.98331	1.82044	M	M	12
190	163.301	1.112	417	4	64	1.112						T	12
191	-126.87	0.421	417	4	64		0.421					T	12
192	-90	0.268	417	4	64			0.268	2.64133	1.5709	T	T	12
193	180	1.146	418	4	65	1.146						M	12
194	-78.69	0.512	418	4	65		0.512					M	12
195	-116.565	0.272	418	4	65			0.272	2.23828	1.88235	M	M	12
196	-162.646	1.727	419	4	66	1.727						T	12
197	-90	0.4	419	4	66		0.4					T	12
198	-90	0.293	419	4	66			0.293	4.3175	1.36519	T	T	12
199	146.31	0.813	420	4	67	0.813						S	12
200	-126.87	0.437	420	4	67		0.437					S	12
201	45	0.283	420	4	67			0.283	1.86041	1.54417	S	S	12
202	-10.305	1.259	421	4	68	1.259						M	12
203	53.13	0.509	421	4	68		0.509					M	12
204	-90	0.241	421	4	68			0.241	2.47348	2.11203	M	M	12
205	-12.529	0.956	422	4	69	0.956						S	12
206	90	0.374	422	4	69		0.374					S	12
207	63.435	0.274	422	4	69			0.274	2.55615	1.36496	S	S	12
208	171.254	1.423	423	4	70	1.423						M	12
209	-102.529	0.977	423	4	70		0.977					M	12
210	-90	0.429	423	4	70			0.429	1.4565	2.27739	M	M	12
211	33.69	1.087	424	4	71	1.087						T	12
212	143.13	0.533	424	4	71		0.533					T	12
213	135	0.321	424	4	71			0.321	2.0394	1.66044	T	T	12
214	-36.87	1.02	425	4	72	1.02						T	12
215	-123.69	0.341	425	4	72		0.341					T	12
216	45	0.378	425	4	72			0.378	2.9912	0.902116	T	T	12
217	71.565	2.425	426	4	73	2.425						M	12
218	-36.87	0.566	426	4	73		0.566					M	12
219	-45	0.301	426	4	73			0.301	4.28445	1.8804	M	M	12
220	-144.462	0.932	427	4	74	0.932						S	12
221	-60.255	0.786	427	4	74		0.786					S	12
222	-68.199	0.523	427	4	74			0.523	1.18575	1.50287	S	S	12
223	58.57	2.23	428	4	75	2.23						M	12
224	-53.13	0.591	428	4	75		0.591					M	12
225	-90	0.268	428	4	75			0.268	3.77327	2.20522	M	M	12
226	-122.471	1.338	429	4	76	1.338						T	12
227	146.31	0.274	429	4	76		0.274					T	12
228	-45	0.301	429	4	76			0.301	4.88321	0.910299	T	T	12
229	29.055	1.001	430	4	77	1.001						T	12
230	-59.036	0.595	430	4	77		0.595					T	12
231	-75.964	0.388	430	4	77			0.388	1.68235	1.53351	T	T	12
232	-125.538	0.864	431	4	78	0.864						M	12
233	-33.69	0.358	431	4	78		0.358					M	12
234	-45	0.188	431	4	78			0.188	2.41341	1.90426	M	M	12
235	-153.435	1.941	432	4	79	1.941						M	12
236	-78.69	0.549	432	4	79		0.549					M	12
237	-90	0.293	432	4	79			0.293	3.53552	1.87372	M	M	12
238	62.103	2.037	433	4	80	2.037						T	12
239	123.69	0.358	433	4	80		0.358					T	12
240	0	0.241	433	4	80			0.241	5.68994	1.48548	T	T	12
241	16.699	1.12	434	4	81	1.12						T	12
242	-78.69	0.569	434	4	81		0.569					T	12
243	-90	0.346	434	4	81			0.346	1.96837	1.64451	T	T	12
244	-135	1.36	435	4	82	1.36						T	12
245	-56.31	0.334	435	4	82		0.334					T	12
246	-90	0.278	435	4	82			0.278	4.07186	1.20144	T	T	12
247	-176.424	1.683	436	4	83	1.683						T	12
248	-71.565	0.362	436	4	83		0.362					T	12
249	-90	0.426	436	4	83			0.426	4.64917	0.849765	T	T	12
250	25.346	2.217	437	4	84	2.217						M	12
251	-71.565	0.985	437	4	84		0.985					M	12
252	-59.036	0.576	437	4	84			0.576	2.25076	1.71007	M	M	12
253	160.71	2.182	438	4	85	2.182						M	12
254	-116.565	0.512	438	4	85		0.512					M	12
255	-116.565	0.274	438	4	85			0.274	4.26172	1.86861	M	M	12
256	71.565	1.668	439	4	86	1.668						M	12
257	180	0.88	439	4	86		0.88					M	12
258	-63.435	0.298	439	4	86			0.298	1.89545	2.95302	M	M	12
259	-19.983	1.238	440	4	87	1.238						T	12
260	63.435	0.536	440	4	87		0.536					T	12
261	-90	0.346	440	4	87			0.346	2.3097	1.54913	T	T	12
262	-122.005	1.019	441	4	88	1.019						T	12
263	135	0.452	441	4	88		0.452					T	12
264	146.31	0.325	441	4	88			0.325	2.25442	1.39077	T	T	12
265	30.964	1.229	442	4	89	1.229						M	12
266	-90	0.666	442	4	89		0.666					M	12
267	-56.31	0.37	442	4	89			0.37	1.84535	1.8	M	M	12
268	55.305	1.736	443	4	90	1.736						M	12
269	-45	0.847	443	4	90		0.847					M	12
270	165.964	0.465	443	4	90			0.465	2.04959	1.82151	M	M	12
271	59.036	1.891	444	4	91	1.891						T	12
272	-45	0.624	444	4	91		0.624					T	12
273	-26.565	0.453	444	4	91			0.453	3.03045	1.37748	T	T	12
274	-131.424	2.449	445	4	92	2.449						T	12
275	153.435	0.48	445	4	92		0.48					T	12
276	-45	0.301	445	4	92			0.301	5.10208	1.59468	T	T	12
277	12.529	0.937	446	4	93	0.937						M	12
278	111.801	0.589	446	4	93		0.589					M	12
279	-71.565	0.321	446	4	93			0.321	1.59083	1.83489	M	M	12
280	-90	1.519	447	4	94	1.519						M	12
281	45	0.904	447	4	94		0.904					M	12
282	0	0.294	447	4	94			0.294	1.68031	3.07483	M	M	12
283	98.746	1.344	448	4	95	1.344						M	12
284	26.565	0.703	448	4	95		0.703					M	12
285	-165.964	0.362	448	4	95			0.362	1.91181	1.94199	M	M	12
286	-147.995	0.988	449	4	96	0.988						M	12
287	129.806	0.754	449	4	96		0.754					M	12
288	-75.964	0.407	449	4	96			0.407	1.31034	1.85258	M	M	12
289	-119.745	1.739	450	4	97	1.739						T	12
290	-14.036	0.388	450	4	97		0.388					T	12
291	-26.565	0.287	450	4	97			0.287	4.48196	1.35192	T	T	12
292	63.435	1.191	451	4	98	1.191						M	12
293	-21.801	0.608	451	4	98		0.608					M	12
294	161.565	0.35	451	4	98			0.35	1.95888	1.73714	M	M	12
295	-98.746	1.375	452	4	99	1.375						M	12
296	32.005	1.005	452	4	99		1.005					M	12
297	0	0.346	452	4	99			0.346	1.36816	2.90462	M	M	12
298	61.699	1.524	453	4	100	1.524						M	12
299	-26.565	0.455	453	4	100		0.455					M	12
300	0	0.168	453	4	100			0.168	3.34945	2.70833	M	M	12
301	45	1.054	454	4	101	1.054						T	12
302	-51.34	0.697	454	4	101		0.697					T	12
303	-45	0.433	454	4	101			0.433	1.5122	1.6097	T	T	12
304	-90	1.733	455	4	102	1.733						M	12
305	14.036	0.465	455	4	102		0.465					M	12
306	0	0.213	455	4	102			0.213	3.72688	2.1831	M	M	12
307	-149.036	1.256	456	4	103	1.256						T	12
308	143.13	0.495	456	4	103		0.495					T	12
309	-33.69	0.321	456	4	103			0.321	2.53737	1.54206	T	T	12
310	-90	0.854	457	4	104	0.854						M	12
311	0	0.644	457	4	104		0.644					M	12
312	-26.565	0.272	457	4	104			0.272	1.32609	2.36765	M	M	12
313	109.983	1.196	458	4	105	1.196						M	12
314	15.255	1.24	458	4	105		1.24					M	12
315	14.036	0.509	458	4	105			0.509	0.964516	2.43615	M	M	12
316	79.695	1.248	459	4	106	1.248						T	12
317	-33.69	0.762	459	4	106		0.762					T	12
318	-14.036	0.885	459	4	106			0.885	1.6378	0.861017	T	T	12
319	-151.699	1.62	460	4	107	1.62						T	12
320	-90	0.399	460	4	107		0.399					T	12
321	0	0.294	460	4	107			0.294	4.06015	1.35714	T	T	12
322	180	2.397	461	4	108	2.397						T	12
323	153.435	0.414	461	4	108		0.414					T	12
324	-90	0.487	461	4	108			0.487	5.78986	0.850103	T	T	12
325	11.31	1.626	462	4	109	1.626						T	12
326	-75.964	0.518	462	4	109		0.518					T	12
327	-63.435	0.485	462	4	109			0.485	3.139	1.06804	T	T	12
328	171.87	1.504	463	4	110	1.504						M	12
329	-90	0.569	463	4	110		0.569					M	12
330	-71.565	0.289	463	4	110			0.289	2.64323	1.96886	M	M	12
331	-113.962	1.064	464	4	111	1.064						T	12
332	-33.69	0.384	464	4	111		0.384					T	12
333	-45	0.251	464	4	111			0.251	2.77083	1.52988	T	T	12
334	18.435	2.347	465	4	112	2.347						M	12
335	-75.964	1.313	465	4	112		1.313					M	12
336	-56.31	0.433	465	4	112			0.433	1.78751	3.03233	M	M	12
337	-139.399	0.969	466	4	113	0.969						S	12
338	-53.13	0.518	466	4	113		0.518					S	12
339	-45	0.603	466	4	113			0.603	1.87066	0.859038	S	S	12
340	-130.601	1.048	467	4	114	1.048						T	12
341	-45	0.377	467	4	114		0.377					T	12
342	-33.69	0.402	467	4	114			0.402	2.77984	0.937811	T	T	12
343	-160.017	1.236	468	4	115	1.236						T	12
344	-90	0.444	468	4	115		0.444					T	12
345	-71.565	0.327	468	4	115			0.327	2.78378	1.3578	T	T	12
346	-155.225	1.572	469	4	116	1.572						T	12
347	-71.565	0.324	469	4	116		0.324					T	12
348	-63.435	0.413	469	4	116			0.413	4.85185	0.784504	T	T	12
349	-151.189	2.512	470	4	117	2.512						M	12
350	-57.995	0.971	470	4	117		0.971					M	12
351	-63.435	0.201	470	4	117			0.201	2.58702	4.83085	M	M	12
352	57.995	1.084	471	4	118	1.084						T	12
353	0	0.374	471	4	118		0.374					T	12
354	-63.435	0.241	471	4	118			0.241	2.8984	1.55187	T	T	12
355	-26.565	2.453	472	4	119	2.453						M	12
356	-96.34	0.932	472	4	119		0.932					M	12
357	33.69	0.466	472	4	119			0.466	2.63197	2	M	M	12
358	-26.565	1.179	473	4	120	1.179						T	12
359	-108.435	0.388	473	4	120		0.388					T	12
360	-135	0.347	473	4	120			0.347	3.03866	1.11816	T	T	12
361	-3.366	1.816	474	4	121	1.816						M	12
362	90	0.933	474	4	121		0.933					M	12
363	-101.31	0.523	474	4	121			0.523	1.94641	1.78394	M	M	12
364	-166.759	1.86	475	4	122	1.86						M	12
365	-90	1.118	475	4	122		1.118					M	12
366	-99.462	0.648	475	4	122			0.648	1.66369	1.72531	M	M	12
367	164.055	0.775	476	4	123	0.775						S	12
368	-99.462	0.622	476	4	123		0.622					S	12
369	-116.565	0.658	476	4	123			0.658	1.24598	0.945289	S	S	12
370	180	0.854	477	4	124	0.854						S	12
371	-90	0.538	477	4	124		0.538					S	12
372	-101.31	0.556	477	4	124			0.556	1.58736	0.967626	S	S	12
373	-21.038	1.444	478	4	125	1.444						T	12
374	63.435	0.298	478	4	125		0.298					T	12
375	-153.435	0.179	478	4	125			0.179	4.84564	1.6648	T	T	12
376	-52.125	1.102	479	4	126	1.102						M	12
377	53.13	0.539	479	4	126		0.539					M	12
378	0	0.228	479	4	126			0.228	2.04453	2.36404	M	M	12
379	-66.801	0.857	480	4	127	0.857						S	12
380	-135	0.304	480	4	127		0.304					S	12
381	45	0.208	480	4	127			0.208	2.81908	1.46154	S	S	12
382	-75.964	0.852	481	4	128	0.852						S	12
383	-135	0.416	481	4	128		0.416					S	12
384	-123.69	0.339	481	4	128			0.339	2.04808	1.22714	S	S	12
385	161.565	0.633	482	4	129	0.633						S	12
386	-116.565	0.441	482	4	129		0.441					S	12
387	-123.69	0.357	482	4	129			0.357	1.43537	1.23529	S	S	12
388	120.256	1.441	483	4	130	1.441						M	12
389	30.964	0.586	483	4	130		0.586					M	12
390	45	0.321	483	4	130			0.321	2.45904	1.82555	M	M	12
391	132.274	1.564	484	4	131	1.564						M	12
392	51.34	0.661	484	4	131		0.661					M	12
393	45	0.341	484	4	131			0.341	2.36611	1.93842	M	M	12
394	153.435	0.941	485	4	132	0.941						S	12
395	-101.31	0.505	485	4	132		0.505					S	12
396	-126.87	0.474	485	4	132			0.474	1.86337	1.0654	S	S	12
397	160.017	1.222	486	4	133	1.222						T	12
398	-101.31	0.46	486	4	133		0.46					T	12
399	-108.435	0.287	486	4	133			0.287	2.65652	1.60279	T	T	12
400	70.017	1.34	487	4	134	1.34						M	12
401	-15.945	0.743	487	4	134		0.743					M	12
402	180	0.433	487	4	134			0.433	1.8035	1.71594	M	M	12
403	-126.87	1.019	488	4	135	1.019						M	12
404	-38.66	0.678	488	4	135		0.678					M	12
405	-26.565	0.325	488	4	135			0.325	1.50295	2.08615	M	M	12
406	59.036	1.311	489	4	136	1.311						M	12
407	165.964	0.388	489	4	136		0.388					M	12
408	153.435	0.203	489	4	136			0.203	3.37887	1.91133	M	M	12
409	49.399	0.969	490	4	137	0.969						S	12
410	-45	0.566	490	4	137		0.566					S	12
411	-14.036	0.43	490	4	137			0.43	1.71201	1.31628	S	S	12
412	-126.87	1.102	491	4	138	1.102						T	12
413	-33.69	0.416	491	4	138		0.416					T	12
414	135	0.301	491	4	138			0.301	2.64904	1.38206	T	T	12
415	48.814	1.13	492	4	139	1.13						M	12
416	130.601	1.04	492	4	139		1.04					M	12
417	-45	0.358	492	4	139			0.358	1.08654	2.90503	M	M	12
418	14.931	1.712	493	4	140	1.712						M	12
419	-90	0.96	493	4	140		0.96					M	12
420	-45	0.421	493	4	140			0.421	1.78333	2.28029	M	M	12
421	-55.491	2.04	494	4	141	2.04						M	12
422	33.69	0.724	494	4	141		0.724					M	12
423	-45	0.416	494	4	141			0.416	2.81768	1.74038	M	M	12
424	-131.186	1.225	495	4	142	1.225						M	12
425	168.69	0.575	495	4	142		0.575					M	12
426	-63.435	0.208	495	4	142			0.208	2.13043	2.76442	M	M	12
427	-146.31	0.687	496	4	143	0.687						S	12
428	143.13	0.491	496	4	143		0.491					S	12
429	143.13	0.474	496	4	143			0.474	1.39919	1.03586	S	S	12
430	-116.565	1.407	497	4	144	1.407						T	12
431	168.69	0.491	497	4	144		0.491					T	12
432	135	0.396	497	4	144			0.396	2.86558	1.2399	T	T	12
433	47.726	1.62	498	4	145	1.62						T	12
434	120.964	0.731	498	4	145		0.731					T	12
435	-78.69	0.497	498	4	145			0.497	2.21614	1.47082	T	T	12
436	-127.569	1.739	499	4	146	1.739						T	12
437	-56.31	0.37	499	4	146		0.37					T	12
438	-45	0.321	499	4	146			0.321	4.7	1.15265	T	T	12
439	53.13	1.635	500	4	147	1.635						M	12
440	-36.87	0.517	500	4	147		0.517					M	12
441	153.435	0.251	500	4	147			0.251	3.16248	2.05976	M	M	12
442	45	0.586	501	4	148	0.586						S	12
443	108.435	0.334	501	4	148		0.334					S	12
444	146.31	0.358	501	4	148			0.358	1.75449	0.932961	S	S	12
445	-161.565	0.952	502	4	149	0.952						S	12
446	108.435	0.329	502	4	149		0.329					S	12
447	-45	0.301	502	4	149			0.301	2.89362	1.09302	S	S	12
1	123.69	1.768	503	5	1	1.768						T	12
2	-150.255	0.523	503	5	1		0.523					T	12
3	180	0.326	503	5	1			0.326	3.3805	1.60429	T	T	12
4	118.61	0.895	504	5	2	0.895						S	12
5	-170.538	0.452	504	5	2		0.452					S	12
6	0	0.302	504	5	2			0.302	1.98009	1.49669	S	S	12
7	118.072	1.187	505	5	3	1.187						M	12
8	-158.199	0.722	505	5	3		0.722					M	12
9	26.565	0.281	505	5	3			0.281	1.64404	2.5694	M	M	12
10	-111.448	2.1	506	5	4	2.1						M	12
11	0	0.234	506	5	4		0.234					M	12
12	0	0.093	506	5	4			0.093	8.97436	2.51613	M	M	12
13	-34.695	1.104	507	5	5	1.104						M	12
14	-101.31	0.373	507	5	5		0.373					M	12
15	26.565	0.2	507	5	5			0.2	2.95979	1.865	M	M	12
16	-78.366	2.464	508	5	6	2.464						M	12
17	180	0.931	508	5	6		0.931					M	12
18	18.435	0.229	508	5	6			0.229	2.64662	4.0655	M	M	12
19	141.34	0.931	509	5	7	0.931						M	12
20	-140.711	0.977	509	5	7		0.977					M	12
21	-149.036	0.368	509	5	7			0.368	0.952917	2.65489	M	M	12
22	119.358	1.325	510	5	8	1.325						M	12
23	18.435	0.876	510	5	8		0.876					M	12
24	180	0.306	510	5	8			0.306	1.51256	2.86275	M	M	12
25	98.13	1.498	511	5	9	1.498						T	12
26	-170.538	0.421	511	5	9		0.421					T	12
27	180	0.302	511	5	9			0.302	3.55819	1.39404	T	T	12
28	119.055	2.886	512	5	10	2.886						M	12
29	-146.31	0.511	512	5	10		0.511					M	12
30	18.435	0.221	512	5	10			0.221	5.64775	2.31222	M	M	12
31	-112.834	1.418	513	5	11	1.418						M	12
32	-14.036	0.265	513	5	11		0.265					M	12
33	180	0.14	513	5	11			0.14	5.35094	1.89286	M	M	12
34	45	0.972	514	5	12	0.972						M	12
35	-50.194	0.512	514	5	12		0.512					M	12
36	-45	0.233	514	5	12			0.233	1.89844	2.19742	M	M	12
37	180	1.699	515	5	13	1.699						M	12
38	-90	0.607	515	5	13		0.607					M	12
39	-108.435	0.237	515	5	13			0.237	2.79901	2.56118	M	M	12
40	43.025	1.432	516	5	14	1.432						M	12
41	-45	0.611	516	5	14		0.611					M	12
42	-18.435	0.281	516	5	14			0.281	2.3437	2.17438	M	M	12
43	127.405	1.457	517	5	15	1.457						M	12
44	-174.289	0.685	517	5	15		0.685					M	12
45	0	0.302	517	5	15			0.302	2.12701	2.26821	M	M	12
46	74.476	1.339	518	5	16	1.339						T	12
47	-153.435	0.312	518	5	16		0.312					T	12
48	-45	0.215	518	5	16			0.215	4.29167	1.45116	T	T	12
49	57.995	0.639	519	5	17	0.639						M	12
50	-15.945	0.525	519	5	17		0.525					M	12
51	0	0.233	519	5	17			0.233	1.21714	2.25322	M	M	12
52	-108.435	0.626	520	5	18	0.626						M	12
53	-9.462	0.406	520	5	18		0.406					M	12
54	180	0.211	520	5	18			0.211	1.54187	1.92417	M	M	12
55	78.69	0.662	521	5	19	0.662						S	12
56	180	0.443	521	5	19		0.443					S	12
57	180	0.279	521	5	19			0.279	1.49436	1.58781	S	S	12
58	63.435	0.336	522	5	20	0.336						S	12
59	-30.964	0.416	522	5	20		0.416					S	12
60	-11.31	0.31	522	5	20			0.31	0.807692	1.34194	S	S	12
61	108.435	0.655	523	5	21	0.655						S	12
62	180	0.349	523	5	21		0.349					S	12
63	-18.435	0.211	523	5	21			0.211	1.87679	1.65403	S	S	12
64	-19.654	3.135	524	5	22	3.135						P	12
65	-124.992	0.858	524	5	22		0.858					P	12
66	158.199	0.344	524	5	22			0.344	3.65385	2.49419	P	P	12
67	102.529	1.953	525	5	23	1.953						M	12
68	23.199	0.523	525	5	23		0.523					M	12
69	-14.036	0.288	525	5	23			0.288	3.73423	1.81597	M	M	12
70	-100.008	1.164	526	5	24	1.164						T	12
71	-18.435	0.272	526	5	24		0.272					T	12
72	-36.87	0.336	526	5	24			0.336	4.27941	0.809524	T	T	12
73	52.595	1.429	527	5	25	1.429						M	12
74	149.744	0.99	527	5	25		0.99					M	12
75	-35.538	0.563	527	5	25			0.563	1.44343	1.75844	M	M	12
76	-85.486	2.663	528	5	26	2.663						M	12
77	-172.875	0.607	528	5	26		0.607					M	12
78	180	0.209	528	5	26			0.209	4.38715	2.90431	M	M	12
79	-122.005	0.684	529	5	27	0.684						M	12
80	-32.005	0.667	529	5	27		0.667					M	12
81	-21.801	0.368	529	5	27			0.368	1.02549	1.8125	M	M	12
82	82.405	1.03	530	5	28	1.03						M	12
83	59.036	0.375	530	5	28		0.375					M	12
84	-26.565	0.147	530	5	28			0.147	2.74667	2.55102	M	M	12
85	34.509	1.382	531	5	29	1.382						M	12
86	-73.301	0.762	531	5	29		0.762					M	12
87	-53.13	0.329	531	5	29			0.329	1.81365	2.31611	M	M	12
88	-77.471	1.282	532	5	30	1.282						M	12
89	11.31	0.356	532	5	30		0.356					M	12
90	0	0.14	532	5	30			0.14	3.60112	2.54286	M	M	12
91	-150.642	1.325	533	5	31	1.325						M	12
92	-59.036	0.787	533	5	31		0.787					M	12
93	-71.565	0.26	533	5	31			0.26	1.68361	3.02692	M	M	12
94	39.806	1.094	534	5	32	1.094						M	12
95	125.538	0.582	534	5	32		0.582					M	12
96	-33.69	0.247	534	5	32			0.247	1.87973	2.35628	M	M	12
97	86.424	1.095	535	5	33	1.095						M	12
98	30.964	0.387	535	5	33		0.387					M	12
99	180	0.186	535	5	33			0.186	2.82946	2.08065	M	M	12
100	77.471	0.658	536	5	34	0.658						S	12
101	0	0.306	536	5	34		0.306					S	12
102	165.964	0.28	536	5	34			0.28	2.15033	1.09286	S	S	12
103	-70.017	0.817	537	5	35	0.817						M	12
104	38.66	0.429	537	5	35		0.429					M	12
105	26.565	0.136	537	5	35			0.136	1.90443	3.15441	M	M	12
106	-141.843	1.196	538	5	36	1.196						M	12
107	-63.435	0.479	538	5	36		0.479					M	12
108	-63.435	0.26	538	5	36			0.26	2.49687	1.84231	M	M	12
109	146.31	0.703	539	5	37	0.703						S	12
110	39.806	0.549	539	5	37		0.549					S	12
111	-140.194	0.527	539	5	37			0.527	1.28051	1.04175	S	S	12
112	-68.629	1.754	540	5	38	1.754						T	12
113	-146.31	0.229	540	5	38		0.229					T	12
114	-153.435	0.188	540	5	38			0.188	7.65939	1.21809	T	T	12
115	160.017	1.626	541	5	39	1.626						T	12
116	78.69	0.333	541	5	39		0.333					T	12
117	-135	0.215	541	5	39			0.215	4.88288	1.54884	T	T	12
118	59.931	1.524	542	5	40	1.524						M	12
119	-29.745	0.563	542	5	40		0.563					M	12
120	0	0.165	542	5	40			0.165	2.70693	3.41212	M	M	12
121	122.905	1.453	543	5	41	1.453						M	12
122	-164.055	0.537	543	5	41		0.537					M	12
123	45	0.149	543	5	41			0.149	2.70577	3.60403	M	M	12
124	167.471	0.635	544	5	42	0.635						S	12
125	-111.801	0.396	544	5	42		0.396					S	12
126	-101.31	0.306	544	5	42			0.306	1.60354	1.29412	S	S	12
127	-98.13	1.028	545	5	43	1.028						T	12
128	-161.565	0.215	545	5	43		0.215					T	12
129	0	0.163	545	5	43			0.163	4.7814	1.31902	T	T	12
130	-53.13	1.41	546	5	44	1.41						M	12
131	-120.964	0.407	546	5	44		0.407					M	12
132	45	0.168	546	5	44			0.168	3.46437	2.42262	M	M	12
133	-96.34	0.635	547	5	45	0.635						S	12
134	-23.199	0.575	547	5	45		0.575					S	12
135	175.236	0.815	547	5	45			0.815	1.10435	0.705521	S	S	12
136	-75.069	2.201	548	5	46	2.201						M	12
137	21.038	0.972	548	5	46		0.972					M	12
138	0	0.119	548	5	46			0.119	2.2644	8.16807	M	M	12
139	125.218	1.452	549	5	47	1.452						T	12
140	56.31	0.23	549	5	47		0.23					T	12
141	26.565	0.165	549	5	47			0.165	6.31304	1.39394	T	T	12
142	-116.565	0.614	550	5	48	0.614						S	12
143	158.199	0.324	550	5	48		0.324					S	12
144	77.471	0.639	550	5	48			0.639	1.89506	0.507042	S	S	12
145	-8.13	0.502	551	5	49	0.502						S	12
146	180	0.35	551	5	49		0.35					S	12
147	47.726	1.004	551	5	49			1.004	1.43429	0.348606	S	S	12
148	-45	0.182	552	5	50	0.182						S	12
149	-26.565	0.156	552	5	50		0.156					S	12
150	144.462	1.233	552	5	50			1.233	1.16667	0.126521	S	S	12
151	-116.565	0.416	553	5	51	0.416						S	12
152	180	0.188	553	5	51		0.188					S	12
153	141.843	1.239	553	5	51			1.239	2.21277	0.151735	S	S	12
154	80.538	0.373	554	5	52	0.373						S	12
155	11.31	0.324	554	5	52		0.324					S	12
156	102.339	2.236	554	5	52			2.236	1.15123	0.144902	S	S	12
157	45	0.149	555	5	53	0.149						M	12
158	83.157	1.729	555	5	53		1.729					M	12
159	14.036	0.531	555	5	53			0.531	0.086177	3.25612	M	M	12
160	0	0.211	556	5	54	0.211						S	12
161	-61.39	0.832	556	5	54		0.832					S	12
162	38.66	0.906	556	5	54			0.906	0.253606	0.918322	S	S	12
163	23.962	0.687	557	5	55	0.687						M	12
164	-66.501	1.749	557	5	55		1.749					M	12
165	-173.66	0.632	557	5	55			0.632	0.392796	2.76741	M	M	12
166	-168.69	0.333	558	5	56	0.333						M	12
167	99.782	2.031	558	5	56		2.031					M	12
168	-175.914	0.956	558	5	56			0.956	0.163959	2.12448	M	M	12
169	-153.435	0.346	559	5	57	0.346						M	12
170	150.068	2.618	559	5	57		2.618					M	12
171	-113.199	0.531	559	5	57			0.531	0.132162	4.93032	M	M	12
172	-146.31	0.219	560	5	58	0.219						M	12
173	158.552	2.087	560	5	58		2.087					M	12
174	-78.69	0.352	560	5	58			0.352	0.104935	5.92898	M	M	12
175	18.435	0.215	561	5	59	0.215						M	12
176	128.991	1.908	561	5	59		1.908					M	12
177	35.538	0.615	561	5	59			0.615	0.112683	3.10244	M	M	12
178	38.66	0.433	562	5	60	0.433						M	12
179	143.842	2.253	562	5	60		2.253					M	12
180	-135	0.709	562	5	60			0.709	0.192188	3.17772	M	M	12
181	33.69	0.24	563	5	61	0.24						M	12
182	133.995	2.764	563	5	61		2.764					M	12
183	40.601	0.626	563	5	61			0.626	0.0868307	4.41534	M	M	12
184	33.69	0.252	564	5	62	0.252						M	12
185	-104.036	1.141	564	5	62		1.141					M	12
186	153.435	0.656	564	5	62			0.656	0.220859	1.73933	M	M	12
187	172.875	0.548	565	5	63	0.548						M	12
188	-114.775	1.978	565	5	63		1.978					M	12
189	146.31	0.742	565	5	63			0.742	0.277048	2.66577	M	M	12
190	0	0.26	566	5	64	0.26						M	12
191	-102.265	1.638	566	5	64		1.638					M	12
192	-128.66	0.477	566	5	64			0.477	0.15873	3.43396	M	M	12
193	-11.31	0.379	567	5	65	0.379						M	12
194	29.982	2.079	567	5	65		2.079					M	12
195	-59.036	0.396	567	5	65			0.396	0.182299	5.25	M	M	12
196	-45	0.331	568	5	66	0.331						M	12
197	123.232	2.439	568	5	66		2.439					M	12
198	-146.31	0.219	568	5	66			0.219	0.135711	11.137	M	M	12
199	26.565	0.156	569	5	67	0.156						M	12
200	-147.724	1.549	569	5	67		1.549					M	12
201	-51.34	0.445	569	5	67			0.445	0.10071	3.4809	M	M	12
202	-36.87	0.375	570	5	68	0.375						M	12
203	165.069	1.084	570	5	68		1.084					M	12
204	-111.801	0.368	570	5	68			0.368	0.345941	2.94565	M	M	12
205	-123.69	0.284	571	5	69	0.284						M	12
206	56.976	1.704	571	5	69		1.704					M	12
207	-63.435	0.77	571	5	69			0.77	0.166667	2.21299	M	M	12
208	-21.801	0.361	572	5	70	0.361						M	12
209	-93.576	2.19	572	5	70		2.19					M	12
210	-168.69	0.375	572	5	70			0.375	0.16484	5.84	M	M	12
211	0	0.279	573	5	71	0.279						S	12
212	-120.964	1.221	573	5	71		1.221					S	12
213	-19.983	0.791	573	5	71			0.791	0.228501	1.54362	S	S	12
214	-26.565	0.449	574	5	72	0.449						S	12
215	-118.301	1.061	574	5	72		1.061					S	12
216	157.38	0.907	574	5	72			0.907	0.423186	1.16979	S	S	12
217	161.565	0.429	575	5	73	0.429						M	12
218	138.504	2.388	575	5	73		2.388					M	12
219	-128.66	0.433	575	5	73			0.433	0.179648	5.51501	M	M	12
220	33.69	0.303	576	5	74	0.303						M	12
221	-126.469	2.001	576	5	74		2.001					M	12
222	-59.036	0.858	576	5	74			0.858	0.151424	2.33217	M	M	12
223	158.199	0.324	577	5	75	0.324						M	12
224	115.278	2.748	577	5	75		2.748					M	12
225	180	0.443	577	5	75			0.443	0.117904	6.20316	M	M	12
226	-146.31	0.271	578	5	76	0.271						S	12
227	-81.87	1.007	578	5	76		1.007					S	12
228	-175.236	0.794	578	5	76			0.794	0.269116	1.26826	S	S	12
229	180	0.419	579	5	77	0.419						M	12
230	33.69	1.207	579	5	77		1.207					M	12
231	-60.255	0.575	579	5	77			0.575	0.347142	2.09913	M	M	12
232	-45	0.382	580	5	78	0.382						M	12
233	-31.43	1.44	580	5	78		1.44					M	12
234	-120.964	0.846	580	5	78			0.846	0.265278	1.70213	M	M	12
235	-150.255	0.511	581	5	79	0.511						M	12
236	56.768	2.433	581	5	79		2.433					M	12
237	135	0.495	581	5	79			0.495	0.210029	4.91515	M	M	12
238	-18.435	0.243	582	5	80	0.243						S	12
239	79.992	1.228	582	5	80		1.228					S	12
240	180	0.977	582	5	80			0.977	0.197883	1.25691	S	S	12
241	-168.69	0.356	583	5	81	0.356						M	12
242	-68.749	1.34	583	5	81		1.34					M	12
243	-141.34	0.414	583	5	81			0.414	0.265672	3.23671	M	M	12
244	11.31	0.379	584	5	82	0.379						S	12
245	135	0.773	584	5	82		0.773					S	12
246	-150.255	0.575	584	5	82			0.575	0.490298	1.34435	S	S	12
247	-153.435	0.312	585	5	83	0.312						M	12
248	-70.71	1.473	585	5	83		1.473					M	12
249	21.801	0.368	585	5	83			0.368	0.211813	4.00272	M	M	12
250	-161.565	0.251	586	5	84	0.251						M	12
251	-49.185	2.06	586	5	84		2.06					M	12
252	-138.366	0.808	586	5	84			0.808	0.121845	2.5495	M	M	12
253	26.565	0.199	587	5	85	0.199						S	12
254	135	0.428	587	5	85		0.428					S	12
255	-128.66	0.412	587	5	85			0.412	0.464953	1.03883	S	S	12
256	-146.31	0.23	588	5	86	0.23						M	12
257	163.072	1.634	588	5	86		1.634					M	12
258	-110.556	0.567	588	5	86			0.567	0.140759	2.88183	M	M	12
259	-135	0.165	589	5	87	0.165						M	12
260	60.642	1.333	589	5	87		1.333					M	12
261	-37.875	0.782	589	5	87			0.782	0.123781	1.7046	M	M	12
262	-127.304	1.88	590	5	88	1.88						M	12
263	-45	0.512	590	5	88		0.512					M	12
264	-26.565	0.284	590	5	88			0.284	3.67187	1.80282	M	M	12
265	-85.601	0.866	591	5	89	0.866						M	12
266	11.31	0.739	591	5	89		0.739					M	12
267	9.462	0.39	591	5	89			0.39	1.17185	1.89487	M	M	12
268	-110.556	0.596	592	5	90	0.596						S	12
269	165.964	0.525	592	5	90		0.525					S	12
270	-21.801	0.419	592	5	90			0.419	1.13524	1.25298	S	S	12
271	-151.699	1.031	593	5	91	1.031						M	12
272	-71.565	0.441	593	5	91		0.441					M	12
273	-45	0.197	593	5	91			0.197	2.33787	2.23858	M	M	12
274	74.745	0.785	594	5	92	0.785						M	12
275	158.199	0.354	594	5	92		0.354					M	12
276	0	0.192	594	5	92			0.192	2.21751	1.84375	M	M	12
277	-112.38	1.283	595	5	93	1.283						T	12
278	-164.055	0.52	595	5	93		0.52					T	12
279	-36.87	0.349	595	5	93			0.349	2.46731	1.48997	T	T	12
280	180	0.838	596	5	94	0.838						M	12
281	68.199	0.412	596	5	94		0.412					M	12
282	-90	0.234	596	5	94			0.234	2.03398	1.76068	M	M	12
283	25.346	1.437	597	5	95	1.437						M	12
284	-83.66	0.609	597	5	95		0.609					M	12
285	-45	0.265	597	5	95			0.265	2.35961	2.29811	M	M	12
286	146.31	0.782	598	5	96	0.782						S	12
287	59.036	0.414	598	5	96		0.414					S	12
288	-135	0.303	598	5	96			0.303	1.88889	1.36634	S	S	12
289	-63.435	1.54	599	5	97	1.54						T	12
290	45	0.56	599	5	97		0.56					T	12
291	11.31	0.356	599	5	97			0.356	2.75	1.57303	T	T	12
292	63.435	0.969	600	5	98	0.969						S	12
293	153.435	0.439	600	5	98		0.439					S	12
294	14.036	0.28	600	5	98			0.28	2.20729	1.56786	S	S	12
295	135	0.972	601	5	99	0.972						M	12
296	-147.995	0.678	601	5	99		0.678					M	12
297	-168.69	0.339	601	5	99			0.339	1.43363	2	M	M	12
298	-102.529	0.611	602	5	100	0.611						S	12
299	170.538	0.419	602	5	100		0.419					S	12
300	180	0.302	602	5	100			0.302	1.45823	1.38742	S	S	12
301	-16.39	1.221	603	5	101	1.221						T	12
302	80.538	0.384	603	5	101		0.384					T	12
303	75.964	0.265	603	5	101			0.265	3.17969	1.44906	T	T	12
304	135	0.709	604	5	102	0.709						S	12
305	45	0.477	604	5	102		0.477					S	12
306	-135	0.313	604	5	102			0.313	1.48637	1.52396	S	S	12
307	135	0.526	605	5	103	0.526						S	12
308	-161.565	0.208	605	5	103		0.208					S	12
309	-161.565	0.251	605	5	103			0.251	2.52885	0.828685	S	S	12
310	123.69	0.782	606	5	104	0.782						S	12
311	-126.87	0.346	606	5	104		0.346					S	12
312	-135	0.219	606	5	104			0.219	2.26012	1.57991	S	S	12
313	25.463	1.592	607	5	105	1.592						T	12
314	105.945	0.523	607	5	105		0.523					T	12
315	-26.565	0.355	607	5	105			0.355	3.04398	1.47324	T	T	12
316	-59.036	1.616	608	5	106	1.616						T	12
317	180	0.419	608	5	106		0.419					T	12
318	165.964	0.302	608	5	106			0.302	3.8568	1.38742	T	T	12
319	-122.735	1.13	609	5	107	1.13						T	12
320	135	0.296	609	5	107		0.296					T	12
321	135	0.23	609	5	107			0.23	3.81757	1.28696	T	T	12
322	-116.565	0.624	610	5	108	0.624						S	12
323	180	0.237	610	5	108		0.237					S	12
324	0	0.233	610	5	108			0.233	2.63291	1.01717	S	S	12
325	-50.528	1.504	611	5	109	1.504						M	12
326	30.964	0.382	611	5	109		0.382					M	12
327	-153.435	0.177	611	5	109			0.177	3.93717	2.15819	M	M	12
328	72.646	1.141	612	5	110	1.141						M	12
329	175.601	0.915	612	5	110		0.915					M	12
330	180	0.512	612	5	110			0.512	1.24699	1.78711	M	M	12
331	-130.601	0.644	613	5	111	0.644						S	12
332	-37.875	0.814	613	5	111		0.814					S	12
333	155.556	0.825	613	5	111			0.825	0.791155	0.986667	S	S	12
334	-27.216	2.717	614	5	112	2.717						M	12
335	-130.601	0.676	614	5	112		0.676					M	12
336	-104.036	0.237	614	5	112			0.237	4.01923	2.85232	M	M	12
337	-115.346	1.467	615	5	113	1.467						M	12
338	180	0.442	615	5	113		0.442					M	12
339	180	0.209	615	5	113			0.209	3.319	2.11483	M	M	12
340	6.009	1.354	616	5	114	1.354						M	12
341	149.036	0.387	616	5	114		0.387					M	12
342	-90	0.084	616	5	114			0.084	3.49871	4.60714	M	M	12
343	29.055	1.489	617	5	115	1.489						M	12
344	-75.964	0.288	617	5	115		0.288					M	12
345	153.435	0.149	617	5	115			0.149	5.17014	1.93289	M	M	12
346	-138.814	0.775	618	5	116	0.775						S	12
347	120.964	0.364	618	5	116		0.364					S	12
348	146.31	0.24	618	5	116			0.24	2.12912	1.51667	S	S	12
349	-161.565	0.678	619	5	117	0.678						S	12
350	-63.435	0.355	619	5	117		0.355					S	12
351	143.13	0.346	619	5	117			0.346	1.90986	1.02601	S	S	12
352	65.225	2.051	620	5	118	2.051						M	12
353	156.801	0.567	620	5	118		0.567					M	12
354	135	0.233	620	5	118			0.233	3.61728	2.43348	M	M	12
355	-167.471	1.255	621	5	119	1.255						T	12
356	-90	0.283	621	5	119		0.283					T	12
357	-90	0.28	621	5	119			0.28	4.43463	1.01071	T	T	12
358	23.749	1.876	622	5	120	1.876						T	12
359	-38.66	0.461	622	5	120		0.461					T	12
360	-53.13	0.316	622	5	120			0.316	4.06941	1.45886	T	T	12
361	-146.31	0.996	623	5	121	0.996						M	12
362	-51.34	0.48	623	5	121		0.48					M	12
363	123.69	0.24	623	5	121			0.24	2.075	2	M	M	12
364	-26.565	1.249	624	5	122	1.249						M	12
365	45	0.494	624	5	122		0.494					M	12
366	75.964	0.251	624	5	122			0.251	2.52834	1.96813	M	M	12
1	90	3.142	625	6	1	3.142						P	12
2	-5.711	0.725	625	6	1		0.725					P	12
3	0	0.303	625	6	1			0.303	4.33379	2.39274	P	P	12
4	119.745	2.806	626	6	2	2.806						T	12
5	26.565	0.645	626	6	2		0.645					T	12
6	18.435	0.398	626	6	2			0.398	4.35039	1.6206	T	T	12
7	84.289	1.357	627	6	3	1.357						T	12
8	0	0.326	627	6	3		0.326					T	12
9	-165.964	0.288	627	6	3			0.288	4.16258	1.13194	T	T	12
10	-84.094	2.059	628	6	4	2.059						M	12
11	180	0.536	628	6	4		0.536					M	12
12	0	0.096	628	6	4			0.096	3.84142	5.58333	M	M	12
13	-63.435	0.926	629	6	5	0.926						S	12
14	-143.973	0.988	629	6	5		0.988					S	12
15	-167.471	0.627	629	6	5			0.627	0.937247	1.57576	S	S	12
16	116.565	1.27	630	6	6	1.27						T	12
17	-158.962	1.001	630	6	6		1.001					T	12
18	-168.69	0.672	630	6	6			0.672	1.26873	1.48958	T	T	12
19	-85.914	1.96	631	6	7	1.96						T	12
20	165.964	0.303	631	6	7		0.303					T	12
21	26.565	0.292	631	6	7			0.292	6.46865	1.03767	T	T	12
22	64.983	1.176	632	6	8	1.176						M	12
23	147.995	0.671	632	6	8		0.671					M	12
24	-21.801	0.344	632	6	8			0.344	1.75261	1.95058	M	M	12
25	-67.834	2.035	633	6	9	2.035						T	12
26	0	0.256	633	6	9		0.256					T	12
27	-168.69	0.346	633	6	9			0.346	7.94922	0.739884	T	T	12
28	99.462	2.097	634	6	10	2.097						M	12
29	-171.254	0.892	634	6	10		0.892					M	12
30	0	0.209	634	6	10			0.209	2.3509	4.26794	M	M	12
31	-87.614	1.652	635	6	11	1.652						T	12
32	0	0.466	635	6	11		0.466					T	12
33	0	0.279	635	6	11			0.279	3.54506	1.67025	T	T	12
34	-116.565	0.937	636	6	12	0.937						S	12
35	-21.801	0.782	636	6	12		0.782					S	12
36	-15.945	0.523	636	6	12			0.523	1.19821	1.49522	S	S	12
37	85.236	0.892	637	6	13	0.892						M	12
38	170.538	0.448	637	6	13		0.448					M	12
39	146.31	0.215	637	6	13			0.215	1.99107	2.08372	M	M	12
40	-107.103	0.95	638	6	14	0.95						S	12
41	-20.556	0.545	638	6	14		0.545					S	12
42	168.69	0.361	638	6	14			0.361	1.74312	1.5097	S	S	12
43	-128.157	1.229	639	6	15	1.229						M	12
44	146.31	0.762	639	6	15		0.762					M	12
45	180	0.257	639	6	15			0.257	1.61286	2.96498	M	M	12
46	108.435	1.553	640	6	16	1.553						M	12
47	-164.055	0.531	640	6	16		0.531					M	12
48	-18.435	0.199	640	6	16			0.199	2.92467	2.66834	M	M	12
49	-115.346	1.468	641	6	17	1.468						M	12
50	-30.964	0.428	641	6	17		0.428					M	12
51	-18.435	0.221	641	6	17			0.221	3.42991	1.93665	M	M	12
52	-84.289	2.156	642	6	18	2.156						T	12
53	180	0.375	642	6	18		0.375					T	12
54	0	0.303	642	6	18			0.303	5.74933	1.23762	T	T	12
55	83.29	1.239	643	6	19	1.239						T	12
56	166.608	1.513	643	6	19		1.513					T	12
57	162.897	0.982	643	6	19			0.982	0.818903	1.54073	T	T	12
58	72.897	0.935	644	6	20	0.935						M	12
59	-32.735	1.169	644	6	20		1.169					M	12
60	173.66	0.632	644	6	20			0.632	0.799829	1.84968	M	M	12
61	90	0.978	645	6	21	0.978						S	12
62	180	0.535	645	6	21		0.535					S	12
63	158.199	0.368	645	6	21			0.368	1.82804	1.4538	S	S	12
64	120.964	0.782	646	6	22	0.782						M	12
65	26.565	0.439	646	6	22		0.439					M	12
66	-135	0.2	646	6	22			0.2	1.78132	2.195	M	M	12
67	49.764	1.219	647	6	23	1.219						M	12
68	-56.31	0.265	647	6	23		0.265					M	12
69	-45	0.149	647	6	23			0.149	4.6	1.77852	M	M	12
70	12.804	1.57	648	6	24	1.57						T	12
71	-80.538	0.445	648	6	24		0.445					T	12
72	-90	0.372	648	6	24			0.372	3.52809	1.19624	T	T	12
73	-90	1.373	649	6	25	1.373						M	12
74	0	0.862	649	6	25		0.862					M	12
75	-171.87	0.448	649	6	25			0.448	1.59281	1.92411	M	M	12
76	90	0.721	650	6	26	0.721						M	12
77	180	0.535	650	6	26		0.535					M	12
78	0	0.256	650	6	26			0.256	1.34766	2.08984	M	M	12
79	-118.072	1.157	651	6	27	1.157						M	12
80	127.875	0.787	651	6	27		0.787					M	12
81	-30.964	0.396	651	6	27			0.396	1.47014	1.98737	M	M	12
82	-78.232	1.716	652	6	28	1.716						T	12
83	-170.538	0.398	652	6	28		0.398					T	12
84	-165.964	0.243	652	6	28			0.243	4.31156	1.63786	T	T	12
85	90	1.048	653	6	29	1.048						T	12
86	-16.699	0.723	653	6	29		0.723					T	12
87	-26.565	0.627	653	6	29			0.627	1.44952	1.15311	T	T	12
88	102.265	1.626	654	6	30	1.626						T	12
89	180	0.396	654	6	30		0.396					T	12
90	180	0.283	654	6	30			0.283	4.10606	1.39929	T	T	12
91	166.608	1.474	655	6	31	1.474						M	12
92	-104.036	0.548	655	6	31		0.548					M	12
93	-165.964	0.294	655	6	31			0.294	2.68978	1.86395	M	M	12
94	180	1.559	656	6	32	1.559						T	12
95	75.964	0.543	656	6	32		0.543					T	12
96	-68.199	0.355	656	6	32			0.355	2.87109	1.52958	T	T	12
97	-149.744	0.979	657	6	33	0.979						S	12
98	-50.194	0.545	657	6	33		0.545					S	12
99	-45	0.477	657	6	33			0.477	1.79633	1.14256	S	S	12
100	-56.889	1.917	658	6	34	1.917						T	12
101	-69.444	0.537	658	6	34		0.537					T	12
102	172.875	0.56	658	6	34			0.56	3.56983	0.958929	T	T	12
103	139.764	1.189	659	6	35	1.189						T	12
104	-130.601	0.642	659	6	35		0.642					T	12
105	-161.565	0.458	659	6	35			0.458	1.85202	1.40175	T	T	12
106	46.975	1.416	660	6	36	1.416						M	12
107	-41.186	0.725	660	6	36		0.725					M	12
108	-53.13	0.298	660	6	36			0.298	1.9531	2.43289	M	M	12
109	48.814	2.211	661	6	37	2.211						M	12
110	-64.537	1.593	661	6	37		1.593					M	12
111	153.435	0.182	661	6	37			0.182	1.38795	8.75275	M	M	12
112	-63.435	0.468	662	6	38	0.468						S	12
113	-158.199	0.42	662	6	38		0.42					S	12
114	-161.565	0.475	662	6	38			0.475	1.11429	0.884211	S	S	12
115	-57.995	0.704	663	6	39	0.704						S	12
116	33.69	0.498	663	6	39		0.498					S	12
117	-167.471	0.635	663	6	39			0.635	1.41365	0.784252	S	S	12
118	-76.608	1.513	664	6	40	1.513						M	12
119	-153.435	0.272	664	6	40		0.272					M	12
120	0	0.14	664	6	40			0.14	5.5625	1.94286	M	M	12
121	127.569	1.164	665	6	41	1.164						M	12
122	-128.66	0.447	665	6	41		0.447					M	12
123	-14.036	0.257	665	6	41			0.257	2.60403	1.7393	M	M	12
124	122.905	1.414	666	6	42	1.414						T	12
125	-161.565	0.177	666	6	42		0.177					T	12
126	-158.199	0.324	666	6	42			0.324	7.9887	0.546296	T	T	12
[truncated: 1,500 more rows]
[truncated: 21 more columns]

## Sheet: Stat.
															type M				type S				type T
	Length		Width		Density		% M		% S		% T		% Spines		Length		Width		Length		Width		Length		Width
	Cond.1	Cond.2	Cond.1	Cond.2	Cond.1	Cond.2	Cond.1	Cond.2	Cond.1	Cond.2	Cond.1	Cond.2	Cond.1	Cond.2	Cond.1	Cond.2	Cond.1	Cond.2	Cond.1	Cond.2	Cond.1	Cond.2	Cond.1	Cond.2	Cond.1	Cond.2
Media	1.32752	1.37778	0.600537	0.601726	9.94036	10.7642	61.3983	46.1202	19.5606	16.9445	19.0411	36.9352	0.942578	0.990811	1.4443	1.46239	0.684997	0.734657	0.757307	0.770546	0.462942	0.479854	1.51402	1.55466	0.489904	0.467772
std. Err.	0.105728	0.186614	0.0392537	0.0952193	1.29564	1.59641	15.2372	11.1764	6.0765	5.46897	12.1865	12.1315	0.0904203	0.0110173	0.114143	0.205961	0.0554407	0.125251	0.0684928	0.0883741	0.0387018	0.072277	0.0996075	0.13079	0.0256778	0.0694559
Media %	1	1.03786	1	1.00198	1	1.08287	1	0.751165	1	0.866257	1	1.93977	1	1.05117	1	1.01252	1	1.0725	1	1.01748	1	1.03653	1	1.02684	1	0.954824
std. Err. %	0.079643	0.140573	0.0653642	0.158557	0.130341	0.160599	0.24817	0.182031	0.31065	0.27959	0.640013	0.637123	0.0959287	0.0116884	0.0790299	0.142602	0.0809356	0.182849	0.0904427	0.116695	0.0835997	0.156125	0.0657902	0.0863858	0.052414	0.141775
P		0.468276		0.971281		0.221291		0.0198193		0.324973		0.00406326		0.111324		0.810823		0.266598		0.71244		0.522437		0.478845		0.407014
	1.31305	1.41701	0.595316	0.633078	11.7423	12.1466	57.8947	40.1961	16.8421	15.6863	25.2632	44.1176	0.979381	1	1.34189	1.54995	0.685127	0.777317	0.74775	0.75225	0.489312	0.522937	1.62383	1.53224	0.460167	0.540822
	1.39446	1.6257	0.58391	0.633457	11.972	10.3253	58.3333	60.4651	17.3611	10.0775	24.3056	29.4574	0.966443	0.969925	1.49489	1.69796	0.668167	0.714474	0.72832	0.804462	0.42064	0.474923	1.62923	1.75832	0.498314	0.521395
	1.37569	1.48487	0.612912	0.647526	10.5454	7.43537	46.6431	31.8966	17.3145	15.5172	36.0424	52.5862	0.992982	0.983051	1.44388	1.59108	0.706977	0.769135	0.79798	0.745389	0.552531	0.602611	1.56496	1.63866	0.520186	0.587016
	1.14656	1.40015	0.547087	0.571	9.37339	11.8491	40.4762	46.9799	33.3333	14.7651	26.1905	38.255	0.992126	1	1.32878	1.51877	0.668039	0.691071	0.739524	0.820773	0.436976	0.451273	1.38297	1.47809	0.500303	0.469754
	1.41715	0.941653	0.613528	0.83462	9.49382	11.8337	48.8889	61.157	22.7778	25.6198	28.3333	13.2231	0.983607	0.991803	1.65301	0.997365	0.776148	1.068	0.76	0.548161	0.441195	0.515355	1.53847	1.44637	0.471471	0.373813
	1.22495	1.42293	0.557341	0.573915	7.56863	8.54263	73.1707	47.4576	18.2927	15.2542	8.53659	37.2881	1	0.983333	1.34482	1.45286	0.583417	0.661643	0.672067	0.861222	0.469	0.563	1.38229	1.61464	0.523143	0.466727
	1.22073	1.50408	0.55951	0.545694	9.02621	11.2768	54.7368	52.381	25.2632	17.0068	20	30.6122	1	0.98	1.33921	1.65919	0.657096	0.65413	0.706042	0.81008	0.428875	0.44164	1.44186	1.62422	0.49025	0.417956
	1.47084	1.41893	0.655667	0.553042	10.3594	12.1606	65.2174	52.6316	13.0435	11.5789	21.7391	35.7895	0.958333	1	1.59162	1.41736	0.762711	0.65232	0.737444	0.834364	0.454222	0.461636	1.54853	1.61035	0.4554	0.436618
	1.28981	1.35167	0.621694	0.519917	9.82571	10.7755	82.2581	27.7778	17.7419	16.6667	0	55.5556	0.738095	1	1.40488	1.2588	0.651392	0.676	0.756273	0.798	0.484	0.369167		1.5642		0.4871
	1.422	1.21081	0.658409	0.505013	9.49668	11.2958	86.3636	40.2597	13.6364	27.2727	0	32.4675	0.814815	1	1.50005	1.48058	0.690895	0.682484	0.927667	0.730762	0.452667	0.396		1.27952		0.37652
						0
					#DIV/0!	0	#VALUE!	0	#VALUE!	0	#VALUE!	0	#VALUE!	0
						0
					#DIV/0!	0	#VALUE!	0	#VALUE!	0	#VALUE!	0	#VALUE!	0
						0
					#DIV/0!	0	#VALUE!	0	#VALUE!	0	#VALUE!	0	#VALUE!	0
						0
					#DIV/0!	0	#VALUE!	0	#VALUE!	0	#VALUE!	0	#VALUE!	0
						0
					#DIV/0!	0	#VALUE!	0	#VALUE!	0	#VALUE!	0	#VALUE!	0
						0
					#DIV/0!	0	#VALUE!	0	#VALUE!	0	#VALUE!	0	#VALUE!	0
						0
					#DIV/0!	0	#VALUE!	0	#VALUE!	0	#VALUE!	0	#VALUE!	0
						0
					#DIV/0!	0	#VALUE!	0	#VALUE!	0	#VALUE!	0	#VALUE!	0
						0
					#DIV/0!	0	#VALUE!	0	#VALUE!	0	#VALUE!	0	#VALUE!	0
					#DIV/0!	0	#VALUE!	0	#VALUE!	0	#VALUE!	0	#VALUE!	0	0		0
	0	0			0	0
	0	0			0	0	0	0	0	0	0	0	0	0	0	0	0	0	0	0	0	0	0	0	0	0
	0	0			0	0
	0	0			0	0	0	0	0	0	0	0	0	0	0	0	0	0	0	0	0	0	0	0	0	0
	0	0			0	0
	0	0			0	0	0	0	0	0	0	0	0	0	0	0	0	0	0	0	0	0	0	0	0	0
	0	0			0	0
	0	0			0	0	0	0	0	0	0	0	0	0	0	0	0	0	0	0	0	0	0	0	0	0
	0	0			0	0
	0	0			0	0	0	0	0	0	0	0	0	0	0	0	0	0	0	0	0	0	0	0	0	0
	0	0			0	0
	0	0			0	0	0	0	0	0	0	0	0	0	0	0	0	0	0	0	0	0	0	0	0	0
	0	0			0	0
	0	0			0	0	0	0	0	0	0	0	0	0	0	0	0	0	0	0	0	0	0	0	0	0
	0	0			0	0
	0	0			0	0	0	0	0	0	0	0	0	0	0	0	0	0	0	0	0	0	0	0	0	0
	0	0			0	0
	0	0			0	0	0	0	0	0	0	0	0	0	0	0	0	0	0	0	0	0	0	0	0	0
	0	0			0	0
	0	0			0	0	0	0	0	0	0	0	0	0	0	0	0	0	0	0	0	0	0	0	0	0
	0	0			0	0
	0	0			0	0	0	0	0	0	0	0	0	0	0	0	0	0	0	0	0	0	0	0	0	0
	0	0			0	0
	0	0			0	0	0	0	0	0	0	0	0	0	0	0	0	0	0	0	0	0	0	0	0	0
	0	0			0	0
	0	0			0	0	0	0	0	0	0	0	0	0	0	0	0	0	0	0	0	0	0	0	0	0
	0	0			0	0
	0	0			0	0	0	0	0	0	0	0	0	0	0	0	0	0	0	0	0	0	0	0	0	0
	0	0			0	0
	0	0			0	0	0	0	0	0	0	0	0	0	0	0	0	0	0	0	0	0	0	0	0	0
	0	0			0	0
	0	0			0	0	0	0	0	0	0	0	0	0	0	0	0	0	0	0	0	0	0	0	0	0
	0	0			0	0
	0	0			0	0	0	0	0	0	0	0	0	0	0	0	0	0	0	0	0	0	0	0	0	0
	0	0			0	0
	0	0			0	0	0	0	0	0	0	0	0	0	0	0	0	0	0	0	0	0	0	0	0	0
	0	0			0	0
	0	0			0	0	0	0	0	0	0	0	0	0	0	0	0	0	0	0	0	0	0	0	0	0
	0	0			0	0
	0	0			0	0	0	0	0	0	0	0	0	0	0	0	0	0	0	0	0	0	0	0	0	0
	0	0			0	0
	0	0			0	0	0	0	0	0	0	0	0	0	0	0	0	0	0	0	0	0	0	0	0	0

## Sheet: Graph.
		LENGTH						WIDTH
	Cond.1		Cond.2				Cond.1		Cond.2
class	cumul.	cumul. %	cumul.	cumul. %		class	cumul.	cumul. %	cumul.	cumul. %
0	0	0	0	0		0	0	0	0	0
0.1	0	0	0	0		0.1	0	0	0	0
0.2	0	0	5	0.428816		0.2	10	0.826446	12	1.02916
0.3	0	0	17	1.45798		0.3	43	3.55372	78	6.68954
0.4	2	0.165289	32	2.74443		0.4	223	18.4298	252	21.6123
0.5	17	1.40496	40	3.43053		0.5	488	40.3306	475	40.7376
0.6	47	3.8843	62	5.31732		0.6	726	60	719	61.6638
0.7	109	9.00826	107	9.17667		0.7	909	75.124	879	75.3859
0.8	185	15.2893	159	13.6364		0.8	1015	83.8843	961	82.4185
0.9	270	22.314	226	19.3825		0.9	1088	89.9174	1027	88.0789
1	362	29.9174	297	25.4717		1	1135	93.8017	1078	92.4528
1.1	460	38.0165	380	32.5901		1.1	1171	96.7769	1102	94.5111
1.2	556	45.9504	458	39.2796		1.2	1184	97.8512	1114	95.5403
1.3	636	52.562	537	46.0549		1.3	1194	98.6777	1129	96.8268
1.4	710	58.6777	625	53.6021		1.4	1203	99.4215	1138	97.5986
1.5	796	65.7851	696	59.6913		1.5	1207	99.7521	1140	97.7702
1.6	856	70.7438	764	65.5232		1.6	1209	99.9174	1143	98.0274
1.7	917	75.7851	823	70.5832		1.7	1209	99.9174	1146	98.2847
1.8	977	80.7438	885	75.9005		1.8	1209	99.9174	1151	98.7136
1.9	1019	84.2149	934	80.1029		1.9	1209	99.9174	1151	98.7136
2	1051	86.8595	973	83.4477		2	1210	100	1153	98.8851
2.1	1076	88.9256	1015	87.0497		2.1	1210	100	1158	99.3139
2.2	1099	90.8264	1043	89.4511		2.2	1210	100	1159	99.3997
2.3	1125	92.9752	1073	92.024		2.3	1210	100	1160	99.4854
2.4	1148	94.876	1089	93.3962		2.4	1210	100	1161	99.5712
2.5	1159	95.7851	1113	95.4545		2.5	1210	100	1163	99.7427
2.6	1169	96.6116	1120	96.0549		2.6	1210	100	1163	99.7427
2.7	1178	97.3554	1127	96.6552		2.7	1210	100	1164	99.8285
2.8	1191	98.4298	1139	97.6844		2.8	1210	100	1166	100
2.9	1193	98.595	1149	98.542		2.9	1210	100	1166	100
3	1197	98.9256	1152	98.7993		3	1210	100	1166	100
3.1	1200	99.1736	1154	98.9708
3.2	1200	99.1736	1159	99.3997
3.3	1203	99.4215	1163	99.7427
3.4	1203	99.4215	1164	99.8285
3.5	1206	99.6694	1164	99.8285
3.6	1206	99.6694	1164	99.8285
3.7	1206	99.6694	1164	99.8285
3.8	1207	99.7521	1164	99.8285
3.9	1209	99.9174	1165	99.9142
4	1209	99.9174	1165	99.9142
