# Supplementary material for: Early structural and functional plasticity alterations in a susceptibility period of DYT1 dystonia mouse striatum
Source: eLife. 2018 Mar 5;7:e33331. doi: 10.7554/eLife.33331 (PMC5849413; doi:10.7554/eLife.33331)
Supplement: Figure 6—source data 1. [file elife-33331-fig6-data1.xlsx]

## Sheet: Figure 6A,B
Figure 6A		TIME COURSE BDNF/proBDNF Tor1a+/+						Table Analyzed	Data 1
								One-way analysis of variance
		BDNF/proBDNF	mean	st dev	SEM			P value	0.043
	p15	0.793244	0.668494	0.244139	0.122069			P value summary	*
	p15	0.799832						Are means signif. different? (P < 0.05)	Yes
	p15	0.778366						Number of groups	3
	p15	0.302534						F	4.783
	p26	0.0842612	0.221805	0.172259	0.0861296			R square	0.5446
	p26	0.061597
	p26	0.377991						ANOVA Table	SS	df	MS
	p26	0.36337						Treatment (between columns)	0.4391	2	0.2195
	p60	0.851259	0.574354	0.241721	0.139558			Residual (within columns)	0.3672	8	0.0459
	p60	0.40554						Total	0.8063	10
	p60	0.466261
								Tukey's Multiple Comparison Test	Mean Diff,	q	Significant? P < 0,05?	Summary	95% CI of diff
								p15 vs p26	0.45	4.201	Yes	*	0,01712 to 0,8829
								p15 vs p60	0.1	0.8643	No	ns	-0,3676 to 0,5676
								p26 vs p60	-0.35	3.025	No	ns	-0,8176 to 0,1176
Figure 6B		TIME COURSE BDNF/proBDNF Tor1a+/∆gag						Table Analyzed	Data 1
		BDNF/proBDNF	mean	st dev	SEM			One-way analysis of variance
	p15	0.344535	0.538838	0.163162	0.0815812			P value	0.0109
	p15	0.72526						P value summary	*
	p15	0.603309						Are means signif. different? (P < 0.05)	Yes
	p15	0.482246						Number of groups	3
	p26	0.349305	0.181568	0.129337	0.0646683			F	8.379
	p26	0.0761819						R square	0.6769
	p26	0.217468
	p26	0.0833171						ANOVA Table	SS	df	MS
	p60	0.238758	0.32041	0.0713663	0.0356831			Treatment (between columns)	0.2627	2	0.1313
	p60	0.315787						Residual (within columns)	0.1254	8	0.01568
	p60	0.314207						Total	0.3881	10
	p60	0.41289
								Tukey's Multiple Comparison Test	Mean Diff,	q	Significant? P < 0,05?	Summary	95% CI of diff
								p15 vs p26	0.36	5.751	Yes	**	0,1070 to 0,6130
								p15 vs p60	0.22	3.254	No	ns	-0,05323 to 0,4932
								p26 vs p60	-0.14	2.071	No	ns	-0,4132 to 0,1332

## Sheet: Figure 6C
Figure 6C
	Values normalized to Tor1a+/+ mean value of each experiment
P26	Tor1a+/+				Tor1a+/Δgag
	proBDNF		BDNF		proBDNF		BDNF		proBDNF	Unpaired t test			BDNF	Unpaired t test
exp 160616	0.5864		0.527104		1.42018		1.68041			P value	0,0052			P value	0,0442
	1.18717		0.551399		1.30781		1.00674			P value summary	**			P value summary	*
	0.961924		1.20478		1.46351		1.24006			Are means signif. different? (P < 0.05)	Yes			Are means signif. different? (P < 0.05)	Yes
	1.29667		1.65297		1.48668		1.18813			One- or two-tailed P value?	Two-tailed			One- or two-tailed P value?	Two-tailed
	0.967843		1.06375		1.56614		1.753			t, df	t=3.238 df=16			t, df	t=2.184 df=16
exp 2204	1.59957		0.894214		1.88481		1.90976
	0.561929		0.447665		2.96046		3.70677			How big is the difference?				How big is the difference?
	0.352738		0.281367		3.49318		5.04282		Tor1a+/+	Mean ± SEM of column A	1.000 ± 0.1245 N=10		Tor1a+/+	Mean ± SEM of column A	1.000 ± 0.2761 N=10
	1.16863		3.13485						Tor1a+/Δgag	Mean ± SEM of column B	1.948 ± 0.2897 N=8		Tor1a+/Δgag	Mean ± SEM of column B	2.191 ± 0.5049 N=8
	1.31713		0.241907							Difference between means	-0.9478 ± 0.2927			Difference between means	-1.191 ± 0.5452
mean	1		1		1.94785		2.19096			95% confidence interval	-1.568 to -0.3272			95% confidence interval	-2.347 to -0.03515
SEM	0.1245		0.2761		0.2897		0.5049			R squared	0,3958			R squared	0,2297
N	10		10		8		8
Student's t test					p<0,01		p<0,05
RAW DATA			Tor1a+/+ = wt
			Tor1a+/Δgag = het											Values normalized to wt mean
exp 160616	proBDNF			BDNF			actin 30s		proBDNF/act		BDNF/act			proBDNF		BDNF
wt639	1231.7		wt639	947.456		wt639	2728.58		0.451407	Mean wt	0.347234	Mean wt		0.5864		0.527104
wt640	2623.46		wt640	1042.75		wt640	2870.7		0.913874	0.769794	0.363239	0.658759		1.18717		0.551399
wt636	2389.41		wt636	2560.99		wt636	3226.82		0.740483		0.793658			0.961924		1.20478
wt637	2786.99		wt637	3040.36		wt637	2792.11		0.998166		1.08891			1.29667		1.65297
wt O	2400.82		wt O	2258.11		wt O	3222.41		0.74504		0.700754			0.967843		1.06375
het A	2574.58		het A	2606.94		het A	2354.99		1.09324		1.10699			1.42018		1.68041
het B	2037.41		het B	1622.46		het B	2446.41		0.832816		0.6632			1.30781		1.00674
het C	3284.23		het C	2381.41		het C	2915.16		1.1266		0.816903			1.46351		1.24006
het635	3300.06		het635	2256.94		het635	2883.58		1.14443		0.782688			1.48668		1.18813
het638	3457.53		het638	3311.82		het638	2867.87		1.20561		1.1548			1.56614		1.753
														Values normalized to wt mean
exp 2204	proBDNF			BDNF			actin 30s		proBDNF/act		BDNF/act			proBDNF		BDNF
wt971	3605.67		wt971	858.284		wt971	2972.53		1.213	Mean wt	0.288739	Mean wt		1.59957		0.894214
wt1344	1088.43		wt1344	369.213		wt1344	2554.23		0.426126	0.758328	0.144549	0.322897		0.561929		0.447665
wt1342	962.527		wt1342	326.92		wt1342	3598.36		0.267491		0.0908526			0.352738		0.281367
wt1345	4118.89		wt1345	4704.62		wt1345	4647.77		0.886208		1.01223			1.16863		3.13485
wt1337	3659.84		wt1337	286.213		wt1337	3664.18		0.998815		0.078111			1.31713		0.241907
het1340	4619.18		het1340	1992.89		het1340	3231.77		1.4293		0.616656			1.88481		1.90976
het1343	6840.38		het1343	3646.89		het1343	3046.94		2.245		1.1969			2.96046		3.70677
het1338	8367.18		het1338	5143.26		het1338	3158.65		2.64898		1.62831			3.49318		5.04282

## Sheet: Figure 6D
	Figure 6D
		sample	Tor1a+/+	Tor1a+/Δgag					Tor1a+/+	Tor1a+/Δgag
		1	1.42866	1.37046				Mean	1	1.399
		2	1.01724	2.38611				Std. Deviation	0.2663	0.4595
		3	0.93389	1.58519				Std. Error	0.08421	0.1625
		4	0.49243	1.12349
		5	1.27426	0.964593				Unpaired Student's t test
		6	1.00208	0.95204				P value	0.0344
		7	0.851449	1.36203				P value summary	*
		8	0.748683	1.44636				Are means signif. different? (P < 0.05)	Yes
		9	1.12176					One- or two-tailed P value?	Two-tailed
		10	1.12956					t, df	t=2,312 df=16
	RAW DATA	(Tor1a+/+ = wt; Tor1a+/Δgag = het)
			Bdnf														hprt
		samples	Ct	Ct	Ct	Ct (mean)	SEM	dCt	SE dCt	2^(-dCt)	SE 2^(-dCt)	ddCt	SE ddCt	-ddCt	2^-ddCt (fold change)	SE 2^-ddCt	Ct	Ct	Ct	Ct (mean)	SEM
	2017-05-30	wt C	28.28	28.18	28.28	28.2467	0.0333333	3.30333	0.0333333	0.101297	0.00234046						24.87	24.98	24.98	24.9433	0.03667
		het B	30.72	30.68	30.56	30.6533	0.048074	3.36333	0.048074	0.0971708	0.00323796	0.06	0.0584998	-0.06	0.959264	0.0388971	27.21	27.3	27.36	27.29	0.04359
		wt G	28.96	29.04	29.06	29.02	0.0305505	3.79333	0.0305505	0.0721262	0.00152734						25.18	25.23	25.27	25.2267	0.02603
		het F	30.63	30.56	30.47	30.5533	2.56333	2.605	0.0463081	0.169184	0.00543054	-1.23	0.0554777	1.23	2.34567	0.0902009	27.99	28.01	27.97	27.99	0.01155
		wt 1	28.52	28.46	28.46	28.48	0.02	3.91667	0.02	0.0662164	0.000917955						24.57	24.54	24.58	24.5633	0.01202
		het H	29.15	29.04	29.04	29.0767	0.0366667	3.15333	0.0366667	0.112396	0.0028566	-0.763333	0.0417665	0.763333	1.69741	0.0732863	25.89	25.91	25.97	25.9233	0.02404
		wt 3	29.19	29.1	29.28	29.19	0.0519615	4.84	0.0519615	0.0349152	0.00125754						24.35	24.74	-	24.55	0.195
		het 5	28.74	28.64	28.74	28.7067	0.0333333	3.65	0.0333333	0.07966	0.00184054	-1.19	0.0617342	1.19	2.28153	0.0976286	25.05	25.08	25.04	25.0567	0.01202
		wt 4	28.7	28.72	28.72	28.7133	0.00666667	3.46833	0.00666667	0.0903499	0.000627706						25.16	25.23	25.33	25.24	0.04933
		het 6	29.13	29.11	29.12	29.1167	0.00881917	3.87	0.00881917	0.0683934	0.000418087	0.401667	0.0110554	-0.401667	0.756983	0.00580079	25.13	25.18	25.43	25.2467	0.0928
		wt 2	31.86	31.81	31.81	31.8267	0.0152753	3.815	0.0152753	0.0710511	0.000752288						28.06	27.95	27.97	27.99	0.03383
		wt E	30.97	30.86	30.9	0.0351188	4.05	0.0351188	0.0351188	0.060371	0.00146958						26.85	26.92	-	26.89	0.035
	2017-07-19	wt N	28.74	28.72	-	28.73	0.01	4.17	0.01	0.0555527	0.000385062						24.62	24.52	24.54	24.56	0.03055
		het Q	28.9	28.78	28.73	28.8033	0.0504425	3.82333	0.0504425	0.0706418	0.00246993	-0.346667	0.0514242	0.346667	1.27162	0.0453262	25.06	24.97	24.93	24.9867	0.03844
		wt R	28.86	28.92	28.78	28.8533	0.0405518	3.58667	#REF!	0.083235	0.0023396						25.24	25.23	25.33	25.2667	0.0318
		het S	28.34	28.33	28.34	28.3367	0.00333333	3.30667	0.00333333	0.101063	0.000233506	-0.28	0.0406885	0.28	1.21419	0.0342441	25.26	24.92	24.91	25.03	0.115
		wt P	29.17	29.09	29.11	29.1233	0.024037	3.57667	0.024037	0.0838139	0.00139644						25.55	25.51	25.58	25.5467	0.02028
		het O	34.14	34.51	34.32	34.3233	0.106823	3.22	0.106823	0.107321	0.00794644	-0.356667	0.109494	0.356667	1.28046	0.0971812	30.96	31.2	31.15	31.1033	0.07311
			2^(-dCt)			2^(-dCt)
		samples	WT	%		ET	%
	2017-05-30	wt C	0.101297	1.42866	et B	0.0971708	1.37046
		wt G	0.0721262	1.01724	et F	0.169184	2.38611
		wt 1	0.0662164	0.93389	et H	0.112396	1.58519
		wt 3	0.0349152	0.49243	et 5	0.07966	1.12349
		wt 4	0.0903499	1.27426	et 6	0.0683934	0.964593
		wt 2	0.0710511	1.00208
		wt E	0.060371	0.851449
		M	0.0709039
	2017-07-19	wt N	0.0555527	0.748683	et Q	0.0706418	0.95204
		wt R	0.083235	1.12176	et S	0.101063	1.36203
		wt P	0.0838139	1.12956	et O	0.107321	1.44636
		M	0.0742005	1		0.100729	1.39878

## Sheet: Figure 6E
Figure 6E
	Values normalized to Tor1a+/+ mean value
P60	Tor1a+/+				Tor1a+/Δgag
	proBDNF		BDNF		proBDNF		BDNF		proBDNF	Unpaired t test			BDNF	Unpaired t test
	0.272776		0.254469		0.795263		0.921416			P value	0,5629			P value	0,9934
	0.91654		1.16966		1.47383		0.696076			P value summary	ns			P value summary	ns
	1.81945		2.16888		0.571623		0.885592			Are means signif. different? (P < 0.05)	No			Are means signif. different? (P < 0.05)	No
	0.581843		0.570618		1.21967		0.434084			One- or two-tailed P value?	Two-tailed			One- or two-tailed P value?	Two-tailed
	0.837317		0.950474		1.89115		2.37589			t, df	t=0.5950 df=12			t, df	t=0.008468 df=12
	1.36009		0.824129		1.27115		1.12921
	1.21198		1.06176		0.853693		0.537844			How big is the difference?				How big is the difference?
mean	1		1		1.15377		0.997159		Tor1a+/+	Mean ± SEM of column A	1.000 ± 0.1942 N=7		Tor1a+/+	Mean ± SEM of column A	1.000 ± 0.2274 N=7
SEM	0.1942		0.2274		0.1706		0.2467		Tor1a+/Δgag	Mean ± SEM of column B	1.154 ± 0.1706 N=7		Tor1a+/Δgag	Mean ± SEM of column B	0.9972 ± 0.2467 N=7
N	7		7		7		7			Difference between means	-0.1538 ± 0.2584			Difference between means	0.002841 ± 0.3355
Student's t test					p>0,05		p>0,05			95% confidence interval	-0.7169 to 0.4093			95% confidence interval	-0.7282 to 0.7339
										R squared	0,02866			R squared	0,000005975
RAW DATA	Tor1a+/+ = wt
	Tor1a+/Δgag = het
	proBDNF		BDNF		actin 60s		proBDNF/act		BDNF/act
								mean wt		mean wt
862wt	1047991		526577	862wt	3816841		0.27457	1.00658	0.137961	0.542155
850het	3598134		2245426	850het	4494891		0.800494		0.499551
856wt	4554083		3130305	856wt	4936305		0.922569		0.634139
874het	7157154		1820648	874het	4824426		1.48352		0.377381
857wt	10365154		6654983	857wt	5659619		1.83142		1.17587
859het	2627305		2192355	859het	4566184		0.575383		0.480128
851wt	2536477		1339820	851wt	4330891		0.585671		0.309364
854het	6043397		1158477	854het	4922548		1.2277		0.235341
848 wt	4475861		2736548	848 wt	5310548		0.842825		0.515304
846 het	9063468		6132983	846 het	4761255		1.90359		1.2881
855wt	6210154		2026770	855wt	4536134		1.36904		0.446806
852het	5742861		2747770	852het	4488305		1.27952		0.612207
860wt	6167154		2910012	860wt	5055255		1.21995		0.575641
858het	4700033		1594891	858het	5469548		0.859309		0.291595
