# Supplementary material for: Early structural and functional plasticity alterations in a susceptibility period of DYT1 dystonia mouse striatum
Source: eLife. 2018 Mar 5;7:e33331. doi: 10.7554/eLife.33331 (PMC5849413; doi:10.7554/eLife.33331)
Supplement: Figure 7—source data 1. [file elife-33331-fig7-data1.xlsx]

## Sheet: Figure 7
Figure 7A		time-course LTD in ANA-12							Figure 7B		time-course LTP in ANA-12							LTD in ANA-12					Figure 7C		AMPAR IV relationship in ANA-12							Figure 7D		time-course LTD in ANA-12							LTD P60 in ANA-12					Figure 7D		time-course LTD in pirenzepine
P28-35		Tor1a+/+	N=3, n=12			Tor1a+/Δgag	N=3, n=10		P24-35		Tor1a+/+	N=3, n=8			Tor1a+/Δgag	N=3, n=9		Tor1a+/+						P26	Tor1a+/+			Tor1a+/Δgag				P60		Tor1a+/+	N=3, n=8			Tor1a+/Δgag	N=3, n=4		Tor1a+/∆gag					P28-35		Tor1a+/Δgag
																		P28-35	pre-HFS	post-HFS				HP (mV)	Mean	SEM	n	Mean	SEM	n											P60	pre-HFS	post-HFS					N=3, n=3
		EPSP amplitude				EPSP amplitude					EPSP amplitude				EPSP amplitude			mean	99.1591	65.3105				-70	-142.991	9.85	3	-151.79	12.87	6				EPSP amplitude				EPSP amplitude			mean	100.031	95.66					EPSP amplitude
	time (s)	mean	sem		time (s)	mean	sem			time (s)	mean	sem		time (s)	mean	sem		SEM	1.26484	1.44031				-40	-98.3679	12.4	3	-111.626	11.31	6			time (s)	mean	sem		time (s)	mean	sem		SEM	6.03034	9.09				time (s)	mean	sem
	-520	102.71	5.88432		-520	101.465	1.76767			-520	102.076	1.74074		-520	100.22	3.85268		n=12	paired Student's t test p<0,05					-25	-68.5213	12.44	3	-77.3548	13.01	5			-520	106.808	8.18568		-520	116.868	8.20029		n=8	paired Student's t test p>0,05					-520	105.252	2.07566
	-500	99.2101	2.34035		-500	100.511	1.10869			-500	98.8812	0.27946		-500	105.181	4.67456								-10	-40.0749	1.82	3	-53.0398	8.97	6			-500	97.8077	8.07571		-500	102.853	9.15932								-500	97.8684	2.00653
	-480	97.2262	2.68325		-480	106.782	3.08484			-480	100.788	0.88989		-480	102.523	4.69342								0	1.47046	9.62	3	-16.9224	8.26	6			-480	97.6662	0.885942		-480	101.882	8.32755								-480	106.66	3.82295
	-460	96.5383	2.22507		-460	102.462	2.60253			-460	97.3428	1.53684		-460	98.3368	1.81449		Tor1a+/∆gag						10	20.153	7.81	3	19.4592	5.24	6			-460	108.616	5.94965		-460	102.712	8.79408		Tor1a+/∆gag in ANA-12						-460	100.861	1.65887
	-440	102.242	1.31702		-440	99.9629	2.02742			-440	95.6248	3.67438		-440	95.703	3.84627		P28-35	pre-HFS	post-HFS				25	45.2478	15.39	3	40.3604	4.43	5			-440	100.136	1.23951		-440	97.0587	8.74786		P60	pre-HFS	post-HFS				-440	105.088	3.60977
	-420	108.362	6.67025		-420	101.496	2.00313			-420	105.298	1.59851		-420	99.6823	4.32787		mean	99.5978	63.4115				40	73.5593	7.76	3	67.6538	7.16	5			-420	99.33	4.63716		-420	88.4772	8.16101		mean	101.038	98.75				-420	102.238	2.50235
	-400	106.006	5.58464		-400	98.8984	2.66274			-400	106.836	8.25406		-400	104.635	2.41985		SEM	0.500294	4.38641					2way ANOVA p>0,05								-400	97.5839	15.1091		-400	86.6763	8.38952		SEM	5.35741	11				-400	94.8031	4.29853
	-380	104.331	2.50843		-380	101.423	1.91847			-380	101.238	6.92248		-380	102.083	4.33874		n=10	paired Student's t test p<0,05														-380	101.054	3.56526		-380	106.893	8.62217		n=4	paired Student's t test p>0,05					-380	103.669	3.49145
	-360	98.3664	3.87821		-360	97.8873	2.47563			-360	96.1927	7.02853		-360	101.859	3.73082																	-360	100.748	4.51731		-360	98.468	8.65654								-360	102.161	1.43362
	-340	94.5971	2.06305		-340	102.502	2.1476			-340	107.292	6.95964		-340	95.0597	2.25315								P26	AMPAR RI in ANA-12								-340	93.6645	10.0197		-340	96.4793	8.31321								-340	102.019	4.95113
	-320	94.5683	6.55774		-320	103.987	1.498			-320	100.632	7.07249		-320	104.357	3.04527		LTP in ANA-12							Tor1a+/+	Tor1a+/Δgag							-320	103.08	4.98676		-320	110.056	7.87089								-320	100.61	1.3512
	-300	97.9533	6.3833		-300	99.1009	4.96624			-300	91.9283	5.94049		-300	101.365	2.85259								mean	0.5122	0.446							-300	102.275	4.04747		-300	119.295	7.60984								-300	103.791	2.03377
	-280	91.6796	6.70181		-280	101.048	2.63393			-280	105.465	9.30689		-280	110.1	2.28251		Tor1a+/+						SEM	0.02591	0.3588							-280	100.159	1.34289		-280	100.535	8.82381								-280	103.256	2.90963
	-260	97.6915	5.74762		-260	96.9396	3.07992			-260	100.504	0.61335		-260	95.3838	2.32184		P24-35	pre-HFS	post-HFS					n=3	n=5							-260	108.298	16.4982		-260	107.363	9.98427								-260	102.843	5.26912
	-240	100.329	4.68774		-240	103.043	1.97841			-240	109.27	3.72666		-240	99.3132	4.45879		mean	100.447	144.554					Student's t test p>0,05								-240	105.678	6.60244		-240	97.6381	8.59725								-240	99.482	3.04408
	-220	101.657	4.07942		-220	99.0457	3.77223			-220	102.205	5.78236		-220	101.022	1.76362		SEM	3.68382	2.67389													-220	100.587	3.13598		-220	87.7568	7.8305								-220	97.5404	1.9368
	-200	99.744	4.69794		-200	101.249	2.16628			-200	98.9276	19.487		-200	96.3078	3.69216		n=8	paired Student's t test p<0,05														-200	91.6132	7.08964		-200	91.3429	7.80953								-200	100.111	3.50181
	-180	99.2915	2.11869		-180	101.544	3.38068			-180	99.9795	2.54333		-180	100.889	4.08385																	-180	101.139	5.04122		-180	106.329	7.90937								-180	94.7597	3.40176
	-160	97.4004	3.51698		-160	98.7431	6.53579			-160	95.6799	1.75989		-160	98.1443	4.29866																	-160	103.107	5.86311		-160	102.649	8.27087								-160	98.2616	3.76644
	-140	106.924	6.84599		-140	99.2036	3.90552			-140	93.7391	7.00857		-140	101.246	2.03069		Tor1a+/∆gag															-140	98.0457	1.01581		-140	102.978	7.99606								-140	97.6978	2.06081
	-120	106.26	2.64944		-120	100.169	3.80144			-120	100.071	2.44892		-120	100.867	3.65787		P24-35	pre-HFS	post-HFS													-120	103.302	3.30669		-120	90.2781	7.26495								-120	97.6998	3.19537
	-100	97.9522	3.44338		-100	98.7401	2.95092			-100	100.103	6.20707		-100	99.1353	5.36103		mean	99.6791	148.11													-100	99.6829	1.68231		-100	100.269	7.28952								-100	96.6829	1.93128
	-80	100.778	6.36781		-80	97.305	2.00712			-80	97.1132	9.70015		-80	96.6559	3.25944		SEM	0.294336	10.5466													-80	99.8077	0.717603		-80	107.253	7.58207								-80	96.5826	2.40553
	-60	98.9507	2.74474		-60	100.472	3.90034			-60	100.137	5.89403		-60	99.4208	2.79368		n=9	paired Student's t test p<0,05														-60	97.3729	1.64824		-60	90.7322	6.63026								-60	100.17	1.20393
	-40	100.225	4.48618		-40	93.9756	4.18883			-40	95.3273	1.17165		-40	97.5839	4.49226																	-40	90.4837	7.57026		-40	103.777	7.56115								-40	105.282	2.96048
	-20	100.497	7.4384		-20	97.8052	2.83218			-20	96.4846	0.1787		-20	95.5154	3.75709																	-20	101.766	4.15707		-20	87.3497	7.45611								-20	96.3799	3.09985
	hfs	***************			hfs	***************				hfs	***************			hfs	***************																		hfs	***************			hfs	***************									hfs	***************
	20	55.2607	8.99371		20	72.9308	3.96564			20	117.869	1.86423		20	125.54	3.71731																	20	93.8217	19.5131		20	99.5486	8.86979								20	--	--
	40	60.9518	10.3854		40	72.6362	2.78609			40	125.119	14.7636		40	115.505	4.29226																	40	90.0737	19.2696		40	98.1862	8.68971								40	88.3179	7.18158
	60	60.3811	9.98978		60	73.507	3.49833			60	140.362	3.31736		60	125.772	8.10721																	60	101.145	2.4185		60	94.5531	8.13901								60	95.4429	5.73211
	80	66.8179	10.0988		80	73.4182	3.13634			80	138.243	6.21751		80	130.071	16.9469																	80	99.427	5.80282		80	89.0409	9.06767								80	98.2956	4.25969
	100	71.8306	4.64135		100	73.9801	2.71616			100	124.539	2.14305		100	132.544	8.38267																	100	96.946	9.73425		100	105.029	8.98067								100	101.977	3.21057
	120	69.5932	3.89831		120	75.113	2.97456			120	128.747	6.83642		120	133.694	5.96061																	120	99.4002	5.27893		120	113.079	8.74019								120	98.6301	5.70725
	140	75.3074	5.47174		140	73.8839	3.79468			140	135.312	8.12476		140	136.679	9.25867																	140	94.4463	14.7291		140	100.692	7.47648								140	97.483	5.93704
	160	68.7441	4.619		160	70.5877	1.3482			160	141.629	13.1612		160	143.653	9.70285																	160	87.707	16.0678		160	105.108	9.32382								160	99.8871	7.05288
	180	67.8566	1.08713		180	71.7047	2.31591			180	148.869	18.7413		180	139.568	10.4919																	180	94.6733	15.6605		180	94.7723	8.95523								180	96.9064	6.68326
	200	75.4305	1.88513		200	68.2695	4.08971			200	139.646	12.6258		200	142.178	11.5192																	200	99.8802	11.1198		200	89.4951	9.22822								200	101.09	5.82489
	220	69.6167	7.45057		220	70.7614	2.73272			220	153.525	10.3833		220	136.063	10.1705																	220	97.4782	20.6269		220	90.1528	9.18025								220	97.308	7.91407
	240	72.6843	7.71201		240	72.8768	3.35025			240	144.581	4.57955		240	146.337	15.8724																	240	92.9523	6.68747		240	95.3674	8.37677								240	94.8962	9.17309
	260	75.8107	7.71148		260	76.501	1.9546			260	138.148	5.24836		260	150.852	10.2589																	260	94.9505	19.7986		260	84.7345	8.86947								260	96.0362	8.13313
	280	75.8101	7.64334		280	76.9582	2.7494			280	151.229	12.8955		280	144.122	12.9386																	280	94.2063	1.34048		280	96.2757	8.11821								280	96.6879	6.74075
	300	77.7085	16.7207		300	75.7365	1.91942			300	142.316	5.4277		300	145.461	8.71584																	300	89.4517	4.32344		300	91.9536	6.8466								300	99.4322	9.64254
	320	79.3014	11.2216		320	71.0632	4.34276			320	143.613	9.59646		320	149.165	11.2158																	320	92.181	11.0169		320	98.468	6.99887								320	90.1175	6.02363
	340	75.0946	11.319		340	75.711	3.01531			340	138.588	0.61109		340	146.393	11.9366																	340	97.6257	6.13265		340	81.0927	7.98142								340	95.1791	6.57993
	360	73.8784	10.4231		360	73.9091	3.70775			360	145.026	13.4906		360	145.595	13.4964																	360	94.55	10.2112		360	84.5466	8.20029								360	99.219	5.74838
	380	76.635	6.198		380	77.8585	3.37483			380	133.366	0.21979		380	145.622	9.85019																	380	101.268	1.26025		380	103.824	9.15932								380	97.2429	4.34902
	400	74.5772	4.92053		400	71.7197	2.88401			400	139.097	1.67319		400	146.333	11.2805																	400	94.2907	9.27772		400	103.229	8.32755								400	98.9659	8.66917
	420	73.0478	13.0328		420	72.6487	4.90265			420	135.641	0.34144		420	142.957	12.1119																	420	103.159	7.2287		420	84.1864	8.79408								420	95.687	4.78424
	440	77.591	8.13433		440	75.9325	4.83784			440	151.649	5.36997		440	140.188	8.94682																	440	99.0512	6.73163		440	104.184	8.74786								440	100.912	4.6708
	460	76.01	11.199		460	72.3899	3.5798			460	137.393	11.0951		460	143.846	14.8272																	460	98.9568	7.22838		460	98.5933	8.16101								460	100.406	6.04429
	480	69.5709	9.25632		480	70.7037	5.44854			480	141.45	12.663		480	141.039	11.53																	480	94.2033	1.43921		480	109.195	8.38952								480	96.6527	4.99364
	500	75.2197	5.19334		500	70.8791	3.28223			500	138.945	21.8407		500	141.66	13.3539																	500	97.6267	4.3437		500	100.676	8.62217								500	92.0875	4.53778
	520	78.5065	7.7663		520	68.8233	7.07786			520	158.358	15.0881		520	137.812	13.4044																	520	90.9953	3.19331		520	89.9648	8.65654								520	101.753	6.75851
	540	75.8319	1.15698		540	70.0096	2.91158			540	138.365	10.0712		540	134.96	8.59809																	540	94.7445	2.47579		540	92.3138	8.31321								540	96.8116	5.55463
	560	74.4788	4.41604		560	64.2024	4.35238			560	137.929	20.6815		560	140.783	6.86794																	560	96.3694	2.11816		560	102.602	7.87089								560	95.6743	4.72015
	580	64.3317	3.88261		580	67.5046	4.50589			580	157.742	3.85568		580	132.555	6.96978																	580	95.1733	10.7409		580	101.13	7.60984								580	103.526	4.07027
	600	64.3251	1.31929		600	64.1941	4.08729			600	149.445	14.8811		600	144.04	12.2803																	600	97.9396	4.32204		600	91.061	8.82381								600	96.4978	5.93922
	620	75.6246	6.03928		620	69.1367	4.64177			620	147.852	1.14949		620	136.962	13.6127																	620	95.4868	0.757589		620	100.441	9.98427								620	100.907	4.89279
	640	65.8772	8.92909		640	65.2653	5.05866			640	147.032	0.53186		640	132.942	9.01228																	640	96.2047	3.89061		640	111.246	8.59725								640	98.6618	4.50706
	660	75.8731	7.45349		660	70.1565	2.56531			660	146.618	7.0014		660	148.946	14.9272																	660	93.3574	18.9406		660	102.211	7.8305								660	96.2763	5.17645
	680	75.6987	2.92939		680	62.982	3.19936			680	138.12	24.6597		680	142.261	9.43706																	680	90.355	8.07127		680	111.356	7.80953								680	94.082	8.69752
	700	73.85	2.257		700	63.672	4.35628			700	164.8	5.5611		700	142.142	10.2535																	700	82.4744	10.2662		700	87.9604	7.90937								700	100.922	8.83096
	720	74.4453	3.96665		720	62.5543	6.32691			720	134.137	21.8642		720	142.446	15.6646																	720	90.5027	10.1837		720	101.976	8.27087								720	92.9353	6.54831
	740	69.7424	5.08062		740	61.4839	6.86957			740	142.08	9.5573		740	147.875	14.2429																	740	94.5661	1.20237		740	109.853	7.99606								740	98.6681	5.61588
	760	69.6723	4.45121		760	70.5797	7.52808			760	147.807	7.34611		760	140.873	8.4054																	760	92.0089	21.0151		760	103.072	7.26495								760	96.8372	6.36614
	780	58.6974	5.58608		780	66.7985	6.75294			780	141.144	2.4522		780	145.279	12.4642																	780	86.482	10.9641		780	103.914	7.28952								780	93.1483	7.51642
	800	69.7146	7.34666		800	58.2599	4.62084			800	142.64	28.8444		800	146.054	14.6435																	800	91.9981	4.47068		800	104.32	7.58207								800	95.8391	4.93107
	820	65.5455	6.14777		820	66.3464	5.58582			820	135.37	6.20349		820	145.653	10.1773																	820	99.8619	13.881		820	100.366	6.63026								820	97.5325	5.63231
	840	68.3293	7.45317		840	64.7102	5.85161			840	135.03	11.4477		840	154.055	17.921																	840	95.9175	5.71404		840	102.25	7.56115								840	94.0398	7.94523
	860	72.0879	7.14917		860	69.2584	3.90819			860	134.769	5.06119		860	148.992	17.3107																	860	92.831	14.0142		860	103.237	7.45611								860	98.9737	3.39417
	880	68.6629	5.6911		880	66.0709	7.45142			880	145.666	20.5572		880	147.291	11.4035																	880	101.889	0.638167		880	98.561	6.8466								880	101.199	5.65879
	900	61.011	3.97421		900	63.1378	5.38733			900	153.275	13.3863		900	146.706	9.21775																	900	101.78	0.6728		900	104.235	6.99887								900	101.323	3.88373
	920	64.1583	6.65967		920	62.7523	6.13002			920	134.93	1.3891		920	148.818	16.5871																	920	94.0509	14.5624		920	100.321	7.98142								920	104.012	4.15671
	940	62.2694	2.55819		940	61.3292	6.27471			940	129.993	4.61445		940	146.005	17.0168																	940	94.5341	17.7159		940	97.9969	8.86979								940	99.3343	4.75408
	960	65.7606	4.92404		960	60.8533	4.99537			960	132.839	2.91653		960	146.839	15.6317																	960	101.54	3.92319		960	98.0703	8.68971								960	99.484	6.73257
	980	63.7681	7.37992		980	62.2144	3.83961			980	130.844	6.1243		980	149.914	17.6215																	980	100.638	2.32752		980	102.272	8.13901								980	101.61	6.40845
	1000	71.4521	3.99932		1000	60.4229	5.37926			1000	144.279	20.0978		1000	142.239	12.3784																	1000	92.4504	15.1906		1000	101.432	9.06767								1000	101.828	4.05328
	1020	58.1995	3.32918		1020	67.251	4.20893			1020	136.354	12.6903		1020	151.143	15.3821																	1020	98.1201	8.24136		1020	100.05	8.98067								1020	100.636	4.77832
	1040	65.4031	1.55065		1040	67.4968	3.74389			1040	149.37	0.87824		1040	145.087	11.265																	1040	91.3916	15.8584		1040	95.8649	8.74019								1040	103.686	4.54559
	1060	63.7457	4.04972		1060	64.8597	3.92964			1060	154.506	0.4592		1060	156.181	18.8896																	1060	97.6696	9.42078		1060	90.9069	7.47648								1060	96.9352	5.74949
	1080	64.7408	8.4883		1080	62.8509	2.61731			1080	135.669	2.99499		1080	143.587	9.08076																	1080	99.7917	10.3117		1080	104.743	9.32382								1080	98.7836	5.97892
	1100	60.1193	9.0882		1100	69.2486	1.70568			1100	133.596	17.2592		1100	154.275	15.8901																	1100	93.2794	12.5266		1100	99.0686	8.95523								1100	97.0009	5.20106
	1120	60.6385	6.76564		1120	65.0928	4.53784			1120	137.713	3.75656		1120	145.215	14.5046																	1120	95.7628	9.48509		1120	103.186	9.22822								1120	95.6291	6.39574
	1140	61.7226	4.62759		1140	66.2083	3.10274			1140	135.647	12.1879		1140	168.492	21.6906																	1140	95.3096	11.7214		1140	102.047	9.18025								1140	102.498	7.25379
	1160	60.8676	4.60851		1160	61.6724	2.0495			1160	152.31	0.43469		1160	141.456	10.6699																	1160	93.1523	9.97828		1160	101.376	8.37677								1160	101.978	5.86261
	1180	60.1962	6.34387		1180	66.5826	3.02586			1180	145.181	2.46069		1180	146.331	13.2033																	1180	95.7542	9.38568		1180	102.035	8.86947								1180	98.3407	8.27265
	1200	66.8402	1.0945		1200	72.6705	3.0521			1200	140.15	4.81727		1200	144.128	17.0153																	1200	98.1494	10.0266		1200	98.0703	8.68971								1200	101.242	7.92457
	1220	63.1407	8.92645		1220	65.5831	3.35008			1220	151.863	23.3133		1220	155.206	16.1282																	1220	93.9699	12.268		1220	102.272	8.13901								1220	107.489	4.90399
	1240	67.102	4.75972		1240	61.4843	3.32117			1240	141.198	8.47603		1240	156.246	16.5233																	1240	103.991	4.0621		1240	101.432	9.06767								1240	93.9638	8.66736
	1260	61.4352	2.14442		1260	61.1087	2.37584			1260	145.454	6.24879		1260	153.718	12.9077																	1260	98.7949	8.48359		1260	100.05	8.98067								1260	100.402	4.89986
	1280	64.6571	4.23943		1280	63.6323	2.03954			1280	148.029	10.412		1280	149.307	17.5272																	1280	93.6357	11.5919		1280	95.8649	8.74019								1280	101.753	2.91886
	1300	58.5342	6.77176		1300	61.4119	3.97303			1300	135.54	2.56146		1300	156.811	16.6806																	1300	100.532	0.347142		1300	90.9069	7.47648								1300	98.1364	8.34261
	1320	66.6626	9.22655		1320	62.9147	4.73328			1320	139.748	2.12705		1320	158.543	12.9714																	1320	91.8631	13.4446		1320	104.743	9.32382								1320	100.772	7.1802
	1340	64.2996	7.30578		1340	62.4903	2.57902			1340	153.787	3.22892		1340	154.762	19.393																	1340	95.1999	11.4936		1340	99.0686	8.95523								1340	96.3306	6.81234
	1360	64.8055	4.77239		1360	61.9512	2.78317			1360	139.096	0.99589		1360	153.634	14.9674																	1360	103.329	0.856197		1360	103.186	9.22822								1360	96.5424	8.34096
	1380	62.8095	5.36608		1380	64.602	3.42626			1380	148.773	11.8014		1380	156.362	10.1828																	1380	89.9713	20.4035		1380	102.047	9.18025								1380	105.401	4.39092
	1400	70.1956	6.11635		1400	62.032	5.77414			1400	154.132	18.1697		1400	158.925	9.51236																	1400	109.058	2.27295		1400	101.976	8.27087								1400	97.1382	6.10536
	1420	61.6293	7.11714		1420	61.588	1.75115			1420	146.586	10.4195		1420	145.518	13.9215																	1420	99.9767	2.33716		1420	109.853	7.99606								1420	104.731	7.41148
	1440	59.2353	5.64212		1440	62.9979	4.20266			1440	145.313	2.90121		1440	154.875	12.4342																	1440	96.5312	7.99966		1440	103.072	7.26495								1440	100.129	7.26299
	1460	62.7299	3.81053		1460	76.4784	5.12925			1460	147.355	5.68862		1460	156.866	13.2347																	1460	92.2479	13.6981		1460	103.914	7.28952								1460	101.384	3.79735
	1480	65.9891	1.64621		1480	60.3014	5.99299			1480	156.257	2.9345		1480	173.445	14.4276																	1480	89.2751	14.1294		1480	104.32	7.58207								1480	96.058	8.45556
	1500	58.465	4.51569		1500	69.5203	3.9991			1500	150.729	7.93047		1500	158.517	7.69808																	1500	94.7947	13.3909		1500	100.366	6.63026								1500	96.5707	4.936
